# Supplementary material
Source: PubMed Central journal article supplement (PMC11616043)
Supplement: SC-015-D4SC04361H-s001.pdf [file SC-015-D4SC04361H-s001.pdf]

Supplemental material for:

## Total Syntheses of Atropodiastereomers of Heterodimeric *Amaryllidaceae* Alkaloids: Narcipavline and Narcikachnine

Souvik Pal,<sup>a</sup> Satyajit Majumder,<sup>a</sup> Sovan Niyogi,<sup>b</sup> Pranay Shyamal,<sup>b</sup> Debabrata Mondal,<sup>b</sup>  
Bishnu Das,<sup>b</sup> and Alakesh Bisai<sup>\*a, b</sup>

<sup>a</sup>Department of Chemical Sciences, Indian Institute of Science Education and Research  
Kolkata, Mohanpur Campus, Kalyani, Nadia – 741 246, West Bengal, INDIA

<sup>b</sup>Department of Chemistry, Indian Institute of Science Education and Research Bhopal, Bhauri,  
Bhopal – 462 066, Madhya Pradesh, INDIA

e-Mail: [alakesh@iiserkol.ac.in](mailto:alakesh@iiserkol.ac.in), [alakeshb@gmail.com](mailto:alakeshb@gmail.com)

### Table of Contents

|                                                                                |             |
|--------------------------------------------------------------------------------|-------------|
| Materials and Methods                                                          | S2          |
| Synthesis of pinacolato borane compound ( <b>SI-1</b> )                        | S4          |
| Synthesis of ( <b>17</b> )                                                     | S5 - S6     |
| Synthesis of galanthaindole ( <b>7</b> )                                       | S6 - S7     |
| Synthesis of azide compound ( <b>SI-5</b> )                                    | S7 - S8     |
| Synthesis of benzyl amine ( <b>12</b> )                                        | S8 - S10    |
| Synthesis of $\alpha$ -substituted enone ( <b>SI-3</b> )                       | S10 - S11   |
| Synthesis of (+)- <b>16</b>                                                    | S12 - S13   |
| Synthesis of (+)- <b>SI-4</b>                                                  | S13 - S14   |
| Synthesis of (–)- <b>14</b>                                                    | S15 - S16   |
| Synthesis of (–)- <b>13</b>                                                    | S16 - S18   |
| Synthesis of (–)- <b>10</b>                                                    | S18 - S19   |
| Synthesis of ( <b>8a</b> and <b>8b</b> )                                       | S19 - S21   |
| Synthesis of ( <b>18a</b> and <b>18b</b> )                                     | S21 - S23   |
| Synthesis of (–)- <b>11</b>                                                    | S23 - S24   |
| Synthesis of (–)- <b>20</b>                                                    | S25 - S26   |
| Synthesis of galanthamine [(–)- <b>6a</b> ]                                    | S27 - S30   |
| Synthesis of lycoramine [(–)- <b>6b</b> ]                                      | S31 - S34   |
| Synthesis of (–)- <b>23</b>                                                    | S36 - S37   |
| Synthesis of (–)- <b>24</b>                                                    | S38 - S39   |
| Synthesis of ( <b>25a</b> and <b>25b</b> )                                     | S39 - S41   |
| Synthesis of ( <b>26a</b> and <b>26b</b> )                                     | S41 - S43   |
| Synthesis of narcipavlines ( <b>1a</b> and <b>1b</b> )                         | S43 - S45   |
| Synthesis of narcikachnines ( <b>2a</b> and <b>2b</b> )                        | S45 - S47   |
| Comparison table of narcipavlines ( <b>1</b> ) and narcikachnines ( <b>2</b> ) | S47 - S56   |
| Theoretical Studies                                                            | S57 - S70   |
| Spectral Traces                                                                | S71 - S137  |
| Single Crystal XRD data                                                        | S138 - S137 |
| References                                                                     | S164        |

## Materials and Methods

Unless otherwise stated, reactions were carried out using oven dried glass ware with Teflon coated magnetic stirring bars were used to stir the reactions. The Syringe was used to transfer the solvents and liquid reagents. Tetrahydrofuran (THF), Diethyl ether (Et<sub>2</sub>O), PhMe was distilled over sodium/benzophenone ketyl. Dichloromethane (CH<sub>2</sub>Cl<sub>2</sub>) was distilled over calcium hydride. All other solvents like MeOH, EtOAc, DMF, Dichloroethane (DCE) and reagents were used as received. Reaction temperatures above 25 °C were maintained by using oil bath on a magnetic stirrer. Thin layer chromatography (TLC) analysis was performed by using silica gel precoated plates (0.25 mm) 60 (F-254), Visualized by UV irradiation, yellow dip stain and other stains. Silica gel of particle size 230-400 and 100-200 mesh were used to perform flash chromatography. Digital melting point apparatus is used to record the melting points. <sup>1</sup>H-NMR spectra were recorded by using 400, 500 MHz spectrometers, <sup>13</sup>C-NMR operating frequencies are 101 MHz, 126 MHz respectively. Chemical shifts (δ) are reported in ppm relative to the residual solvents (CDCl<sub>3</sub>) signal (δ = 7.29 ppm for <sup>1</sup>H NMR and δ = 77.0 ppm for <sup>13</sup>C NMR) and (CD<sub>3</sub>OD) signal (δ = 3.33 for <sup>1</sup>H NMR and δ = 49.0 for <sup>13</sup>C NMR). Data for <sup>1</sup>H NMR spectra are reported as follows: chemical shift (multiplicity, coupling constants, and number of hydrogen). Abbreviations are as follows: s (singlet), d (doublet), t (triplet), q (quartet), m (multiplet), br (broad). IR spectra were recorded on a FT-IR system (Spectrum BX) and are reported in frequency of absorption (cm<sup>-1</sup>). Only selected IR absorbencies are reported. High Resolution Mass Spectrometry (HRMS) data was recorded on MicrOTOF-Q-II mass spectrometer using methanol as solvent. Optical rotations were measured on an automatic polarimeter. Enantiomeric excess was determined by chiral HPLC analysis performed on HPLC system with Daicel Chiralpak IA, IC-3, OD-H column.

## Synthesis of galanthindole and corresponding benzylamine:

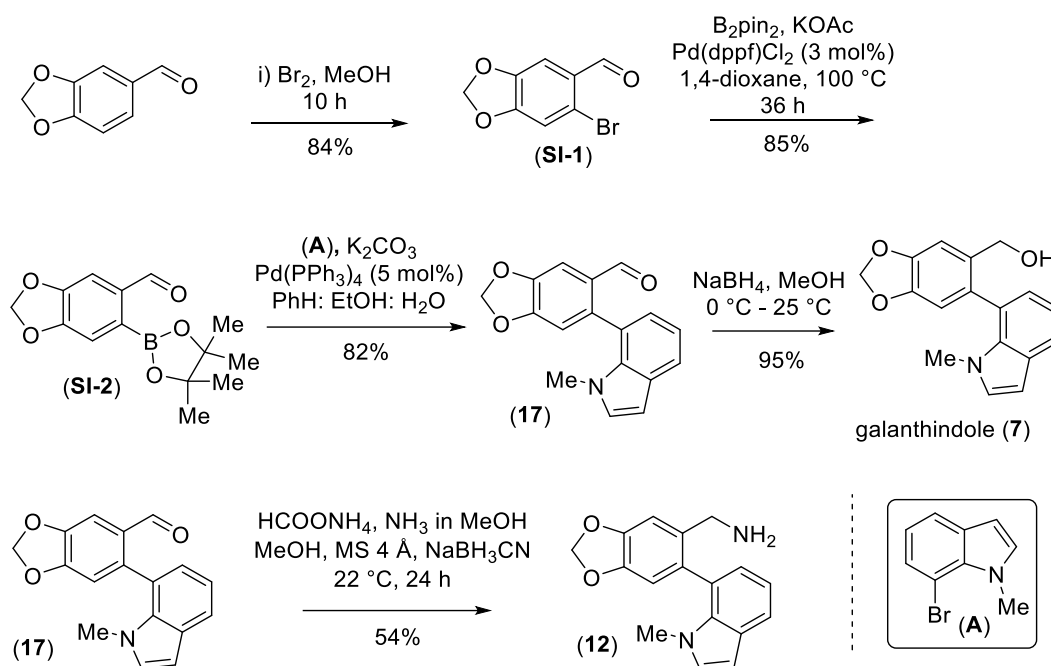

For the synthesis of galanthindole, we followed Hsieh's procedure.<sup>1a</sup> However, we have modified the procedure a bit where **SI-2** was converted to **17** under Suzuki coupling using  $\text{Pd(PPh}_3)_4$  as catalyst [as compared to the literature use of  $\text{Pd(II)}$ ]. Further, compound **17** was reduced to galanthindole **7** just by  $\text{NaBH}_4$  reduction [as compared to the literature use of  $\text{LiAlH}_4$  reduction]. Overall yield of galanthindole **7** from piperonal is 56% over 4 steps. Further, the reductive amination of aldehyde **17** afforded benzyl amine **12** in 54% yield.

## Preparation of $\alpha$ -substituted enone (**SI-3**) via Trost's procedure:

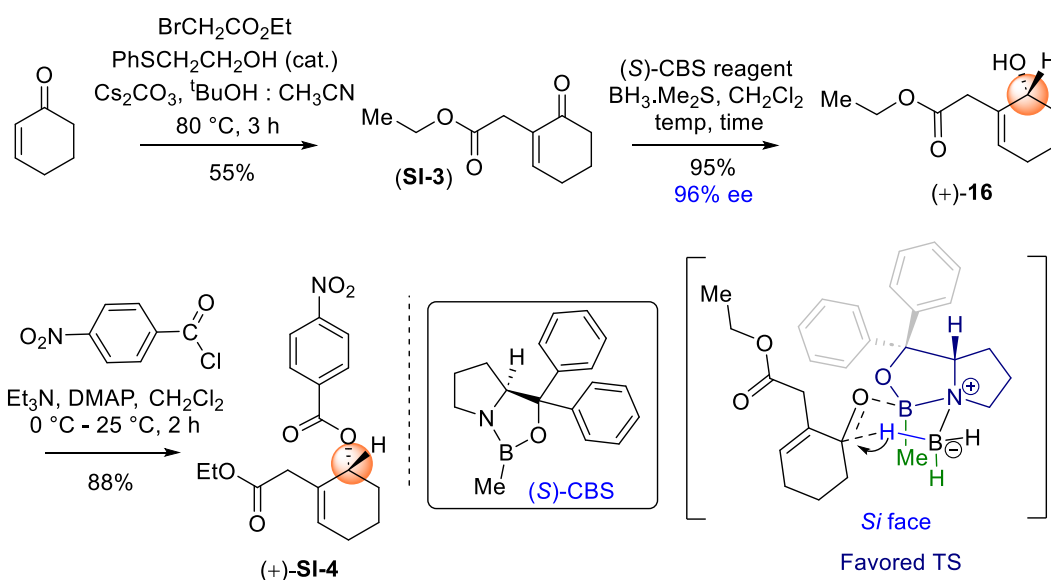

- Trost have prepared SI-3 in three steps from cyclohexanone.
- Our developed methodology can access SI-3 in only 1 step with good yield.
- Asymmetric reduction of SI-3 was done using (*S*)-CBS reagent.

### Preparation of pinacolato borane compound (SI-2):

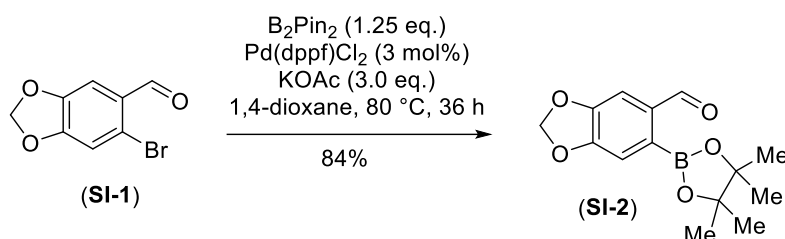

Bis(pinacolato)diboron (2.66 g, 10.46 mmol, 1.2 equiv.), 6-bromobenzo[*d*][1,3]dioxole-5-carbaldehyde (**SI-1**) (2 gm, 8.72 mmol, 1.0 equiv), PdCl<sub>2</sub>(dppf) (192 mg, 0.26 mmol, 3 mol %) and KOAc (2.56 g, 26 mmol, 3.0 equiv) were stirred in a sealed tube in dry 1,4-dioxane (25 mL) under N<sub>2</sub> atmosphere at 80 °C for 36 h. Upon completion of the reaction (as judged by running TLC), the reaction mixture was diluted with water (20 mL) and extracted with EtOAc (20 mL X 2). The combined organic layers were dried over Na<sub>2</sub>SO<sub>4</sub> and concentrated under the reduced pressure. Next, purification through a column chromatography (10% EtOAc in hexane)] to afford **SI-2** (2.02 g, 84%) as a white solid.

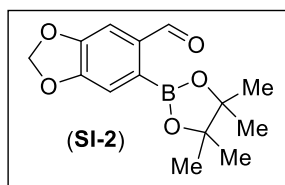

**6-(4,4,5,5-Tetramethyl-1,3,2-dioxaborolan-2-yl)benzo[*d*][1,3]dioxole-5-carbaldehyde (SI-2):** Compound **SI-2** was obtained as a white solid (8.72 mmol scale of reaction, 2.02 gm of product, 84% yield);  $R_f = 0.6$  (20% EtOAc in *n*-hexane).

<sup>1</sup>H NMR (500 MHz, CDCl<sub>3</sub>): δ 10.41 (s, 1H), 7.35 (s, 1H), 7.21 (s, 1H), 5.95 (s, 2H), 1.27 (s, 12H).

<sup>13</sup>C {<sup>1</sup>H} NMR (126 MHz, CDCl<sub>3</sub>): δ 192.8, 151.8, 150.3, 138.1, 114.7, 108.3, 106.66, 101.9, 84.4, 24.8.

IR (film) $\nu_{\text{max}}$ : 3450, 2970, 2925, 2900, 1696, 1600, 1252  $\text{cm}^{-1}$ .

**Suzuki coupling between 7-bromo *N*-methyl indole and pinacolatoborane compound (SI-2):**

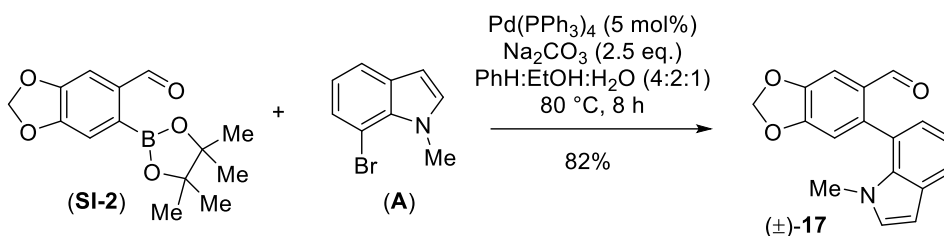

Pinacolato-borane derivative **SI-2** (1.97 mg, 7.54 mmol, 1.25 equiv.), and 7-bromo *N*-methyl indole (**A**) (1.2 g, 5.72 mmol, 1.0 equiv.), and Na<sub>2</sub>CO<sub>3</sub> (1.5 g, 14.3 mmol, 2.5 equiv.) were stirred in a sealed tube in PhH: EtOH: H<sub>2</sub>O (4:2:1) (15 mL) under N<sub>2</sub> atmosphere and degassed for 10 min. Next, Pd(PPh<sub>3</sub>)<sub>4</sub> (165 mg, 0.143 mmol, 5 mol %) was added to the reaction mixture under inert atmosphere. Then, capped the sealed tube and heated at 80 °C for 12 h. Upon complete consumption of starting materials, the organic layers were separated and washed with brine. The combined organic layers were dried over Na<sub>2</sub>SO<sub>4</sub> and the organic layers were concentrated under reduced pressure. Purification through a column chromatography (10% EtOAc in hexane) afforded **17** (1.3 gm, 82% yield) as a yellow gel.

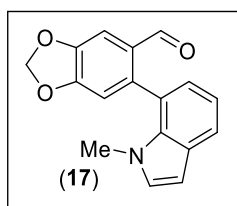

**6-(1-Methyl-1H-indol-7-yl)benzo[d][1,3]dioxole-5-carbaldehyde [(±)-17]:** Compound **17** was obtained as a yellow gel (5.72 mmol scale of reaction, 1.3 g of product, 82% yield);  $R_f = 0.45$  (20% EtOAc in *n*-hexane).

**<sup>1</sup>H NMR** (500 MHz, CDCl<sub>3</sub>):  $\delta$  9.56 (d,  $J = 1.8$  Hz, 1H), 7.70 (d,  $J = 7.9$  Hz, 1H), 7.51 (s, 1H), 7.15 (t,  $J = 7.6$  Hz, 1H), 7.05 – 6.98 (m, 2H), 6.93 (s, 1H), 6.58 (dd,  $J = 3.4, 1.6$  Hz, 1H), 6.16 (d,  $J = 8.0$  Hz, 2H), 3.33 (s, 2H).

$^{13}\text{C}$   $\{^1\text{H}\}$  NMR (126 MHz,  $\text{CDCl}_3$ ):  $\delta$  190.7, 151.7, 148.2, 141.3, 134.8, 131.2, 130.4, 129.7, 125.0, 121.3, 120.8, 119.0, 111.4, 105.5, 102.2, 101.4, 36.2.

HRMS (ESI-TOF)  $m/z$ :  $[\text{M}+\text{H}]^+$  Calcd for  $[\text{C}_{17}\text{H}_{13}\text{NO}_3 + \text{H}]^+$  280.0974; Found 280.0984.

IR (film) $\nu_{\text{max}}$ : 2927, 1683, 1600, 1509, 1353, 1266, 1137, 1061  $\text{cm}^{-1}$ .

### Synthesis of galanthindole $[(\pm)\text{-}7]$ :

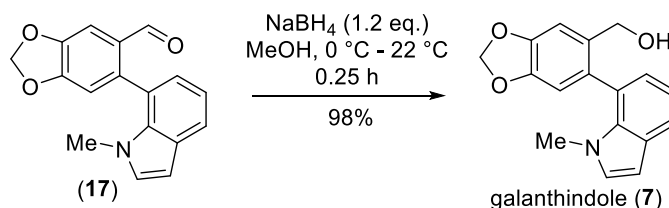

Compound **17** (1 gm, 3.58 mmol, 1.0 equiv.) was dissolved in MeOH and stirred it in  $0\text{ }^\circ\text{C}$ . Then,  $\text{NaBH}_4$  (162 mg, 4.3 mmol, 1.2 equiv.) was added portion wise to the reaction mixture at  $0\text{ }^\circ\text{C}$ . Then ice bath was removed and stirred the reaction mixture for another 20 minutes. Upon completion of the reaction, it was quenched with saturated  $\text{NH}_4\text{Cl}$  solution and the organic layer was extracted with EtOAc (20 mL X 2). The combined organic layers were dried over  $\text{Na}_2\text{SO}_4$  and concentrated under reduced pressure. The crude reaction mixture was purified using column chromatography (22% EtOAc/*n*-hexane) to afford **7** (986 mg, 98% yield), as a white solid.

### Attempts towards asymmetric reduction of **17** using (*S*)-CBS and Borane.DMS:

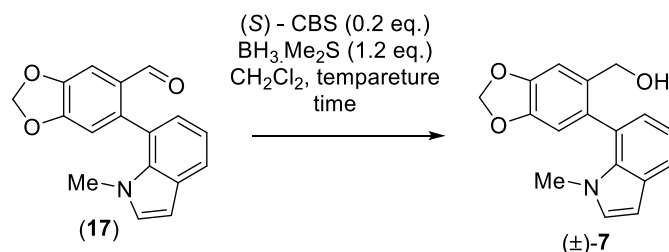

| ( <i>S</i> )-CBS | Solvent                  | Temp                       | Time | Yield <sup>b</sup> | <i>ee</i> <sup>c</sup> |
|------------------|--------------------------|----------------------------|------|--------------------|------------------------|
| 20 mol%          | $\text{CH}_2\text{Cl}_2$ | $22\text{ }^\circ\text{C}$ | 1 h  | 85%                | 0                      |
| 20 mol%          | $\text{CH}_2\text{Cl}_2$ | $0\text{ }^\circ\text{C}$  | 3 h  | 78%                | 0                      |

|         |                                 |        |     |     |   |
|---------|---------------------------------|--------|-----|-----|---|
| 20 mol% | CH <sub>2</sub> Cl <sub>2</sub> | -78 °C | 3 h | 60% | 0 |
|---------|---------------------------------|--------|-----|-----|---|

<sup>a</sup>All reactions were carried out using 0.18 mmol of **17** with 1.2 equiv. Of BH<sub>3</sub>.Me<sub>2</sub>S.

<sup>b</sup>Yields are reported after column chromatography. <sup>c</sup>HPLC analysis were done using ChiralPak IA column.

To a stirred solution of (*S*)-CBS [36 μL (1*M* in toluene), 0.036 mmol, 0.2 equiv.] in dry CH<sub>2</sub>Cl<sub>2</sub> (3 mL) was added BH<sub>3</sub>.Me<sub>2</sub>S [22 μL (1*M* in THF), 0.22 mmol, 1.2 equiv.] dropwise at 25 °C. After 10 min of stirring at this temperature, the reaction mixture transferred to 0 °C chiller, then a solution of aldehyde **13** (50 mg, 0.18 mmol, 1.0 equiv.) in CH<sub>2</sub>Cl<sub>2</sub> (2 mL) was added slowly to the mixture. Following completion of the reaction, the reaction mixture was quenched with 2(*M*) HCl (1 mL) and extracted with CH<sub>2</sub>Cl<sub>2</sub> (5 mL X 2). The combined organic layers were dried over Na<sub>2</sub>SO<sub>4</sub> and concentrated in vacuo under reduced pressure. The crude reaction mixture was purified using column chromatography (22% EtOAc/*n*-hexane) to afford **7** (986 mg, 98% yield), as a white solid.

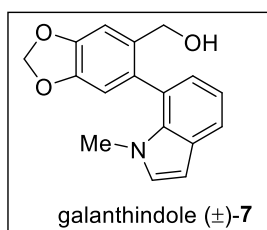

**(6-(1-Methyl-1*H*-indol-7-yl)benzo[*d*][1,3]dioxol-5-yl)methanol [(±)-7]**: Compound **7** was obtained as a white solid (3.58 mmol scale of reaction, 986 mg of product, 98% yield); *R*<sub>f</sub> = 0.4 (30% EtOAc in *n*-hexane).

<sup>1</sup>H NMR (500 MHz, CDCl<sub>3</sub>): δ 7.65 (d, *J* = 7.9 Hz, 1H), 7.12 (t, *J* = 7.5 Hz, 1H), 7.07 (s, 1H), 7.00 – 6.93 (m, 2H), 6.85 (s, 1H), 6.55 (d, *J* = 3.1 Hz, 1H), 6.06 (d, *J* = 8.9 Hz, 2H), 4.32 (d, *J* = 3.5 Hz, 2H), 3.31 (s, 3H).

<sup>13</sup>C {<sup>1</sup>H} NMR (126 MHz, CDCl<sub>3</sub>): δ 147.6, 146.4, 134.3, 133.8, 132.3, 131.0, 129.8, 124.0, 123.9, 120.7, 119.3, 111.1, 108.1, 101.4, 101.3, 63.3, 35.9.

**HRMS** (ESI-TOF) *m/z*: [M+H]<sup>+</sup>Calcd for [C<sub>17</sub>H<sub>15</sub>NO<sub>3</sub> + H]<sup>+</sup> 282.1130; Found 282.1136.

**IR** (film)*ν*<sub>max</sub>: 3357, 2935, 1481, 1021 cm<sup>-1</sup>.

Melting point: 128-130 °C.

HPLC analysis was done using a Chiralpak IA column [*n*-hexane/2-propanol = 85/15; flow rate: 1.0 mL/min; detection: at 254 nm,  $t_R = 8.376$  min,  $t_R = 9.699$  min, (50:50)].

HPLC data of (±)-**7** [reaction using *S*-CBS at 22 °C]:  $t_R = 8.409$  min,  $t_R = 9.788$  min, (50:50)

HPLC data of (±)-**7** [reaction using *S*-CBS at 0 °C],  $t_R = 8.391$  min,  $t_R = 9.721$  min, (50:50)

HPLC data of (±)-**7** [reaction using *S*-CBS at -78 °C],  $t_R = 8.374$  min,  $t_R = 9.792$  min, (50:50)

### Alternative approach to galanthindolyl benzylic amine (**12**) from galanthindole (**7**):

#### Synthesis of azide compound (**SI-5**):

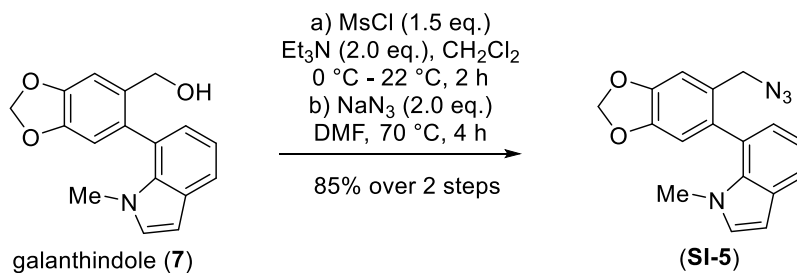

An oven dried round bottom flask charged with **7** (900 mg, 3.2 mmol, 1.0 equiv.) in CH<sub>2</sub>Cl<sub>2</sub> followed by addition of triethylamine (TEA) (900 μL, 6.4 mmol, 2.0 equiv.) at 0 °C. After 5-minute of stirring, methane sulfonyl chloride (372 μL, 4.8 mmol, 1.5 equiv.) was added at 0 °C over 2 minutes and allowed to stir the reaction mixture for 2 h. Upon complete consumption of starting materials (monitored by TLC analysis), the reaction mixture was quenched with water and it was extracted with dichloromethane (30 mL X 2). Next, organic layers were dried over Na<sub>2</sub>SO<sub>4</sub> and concentrated under reduced pressure, to afford the crude mesylate derivative.

The crude product was taken in a 50 mL RB and dissolved in DMF (5 mL) under N<sub>2</sub> atmosphere. Sodium azide (208 mg, 6.4 mmol, 2.0 equiv.) was added to it and the reaction mixture was warm at 70 °C for 4 h. Upon complete consumption of starting materials (as monitored by TLC analysis), organic layer was extracted with 40% EtOAc in hexane and concentrated under reduced pressure. The crude reaction mixture was purified using column chromatography (6% EtOAc/*n*-hexane) to afford **SI-5** (830 mg, 85%), as a colorless gel.



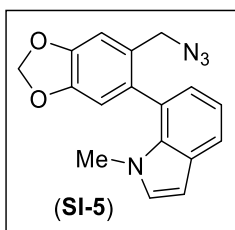

**7-(6-(Azidomethyl) benzo[*d*][1,3]dioxol-5-yl)-1-methyl-1*H*-indole (SI-5):** Compound **SI-5** was obtained as a colorless gel (3.2 mmol scale of reaction, 830 mg of product, 85% yield);  $R_f = 0.65$  (10% EtOAc in *n*-hexane).

**$^1\text{H}$  NMR** (500 MHz,  $\text{CDCl}_3$ ):  $\delta$  7.67 (dd,  $J = 7.9, 1.1$  Hz, 1H), 7.14 (t,  $J = 7.5$  Hz, 1H), 6.99 (s, 2H), 6.95 (d,  $J = 6.7$  Hz, 1H), 6.88 (s, 1H), 6.56 (d,  $J = 3.2$  Hz, 1H), 6.08 (dd,  $J = 8.5, 1.3$  Hz, 2H), 4.07 (s, 2H), 3.32 (s, 3H).

**$^{13}\text{C}$  { $^1\text{H}$ } NMR** (126 MHz,  $\text{CDCl}_3$ ):  $\delta$  147.8, 147.0, 134.2, 133.4, 131.0, 129.9, 128.6, 124.33, 123.4, 120.9, 119.3, 111.3, 108.6, 101.6, 101.4, 52.7, 36.0.

**HRMS** (ESI-TOF)  $m/z$ :  $[\text{M}+\text{H}]^+$  Calcd for  $[\text{C}_{17}\text{H}_{14}\text{N}_4\text{O}_2 + \text{H}]^+$  307.1195; Found 307.1197.

**IR** (film) $\nu_{\text{max}}$ : 2294, 1723, 1536, 1156, 856  $\text{cm}^{-1}$ .

### Synthesis of benzylic amine (**12**):

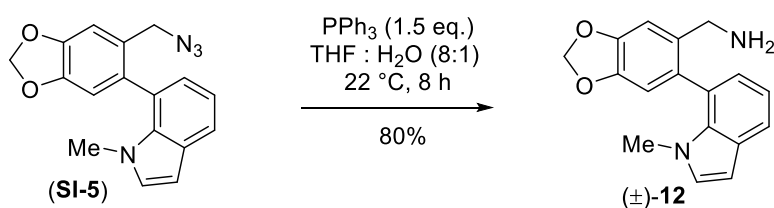

In a 50 mL round bottom flask, compound **SI-5** (800 mg, 2.6 mmol, 1.0 equiv.) was dissolved in THF:  $\text{H}_2\text{O}$  (8:1) (20 mL), and triphenyl phosphine (1.2 gm, 3.9 mmol, 1.5 equiv.) was added and stirred the reaction mixtures for 8 h. After complete consumption of the starting material (monitored by TLC analysis) the reaction mixture was diluted with EtOAc (5 mL). Then the organic layer was extracted with EtOAc (10 mL X 3). Next, the crude product was purified *via* column chromatography (with basic alumina using 40% EtOAc in hexane to 10% MeOH in  $\text{CH}_2\text{Cl}_2$ ) to afford benzyl amine **12** in 80% yield (590 mg) as yellow gel.

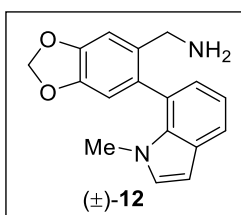

**(6-(1-Methyl-1H-indol-7-yl)benzo[*d*][1,3]dioxol-5-yl)methanamine [(±)-12]:** Compound **12** was obtained as a yellow semi-solid (2.6 mmol scale of reaction, 590 mg of product, 80% yield);  $R_f = 0.35$  (70% EtOAc in *n*-hexane).

**$^1\text{H}$  NMR** (500 MHz,  $\text{CDCl}_3$ ):  $\delta$  7.64 (d,  $J = 8.1$  Hz, 1H), 7.12 (t,  $J = 7.8$  Hz, 1H), 7.01 (s, 1H), 6.98 – 6.95 (m, 2H), 6.84 (s, 1H), 6.55 (dd,  $J = 3.1, 1.3$  Hz, 1H), 6.12 – 5.96 (m, 2H), 3.50 (s, 2H), 3.31 (s, 3H).

**$^{13}\text{C}$  { $^1\text{H}$ } NMR** (126 MHz,  $\text{CDCl}_3$ ):  $\delta$  147.6, 145.8, 136.1, 134.3, 132.1, 130.9, 129.8, 124.4, 124.1, 120.5, 119.3, 111.2, 107.9, 101.3, 44.4, 35.8.

**IR** (film) $\nu_{\text{max}}$ : 3512, 3380, 1150, 1091, 812  $\text{cm}^{-1}$ .

#### Synthesis of benzylic amine [(±)-12]:

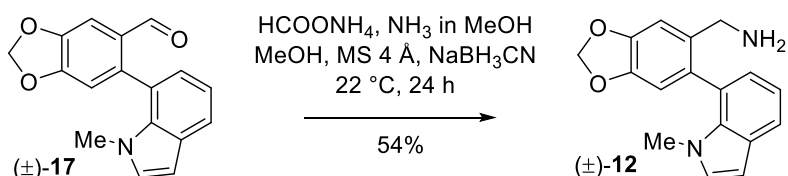

An oven dried round bottom flask was charged with aldehyde compound **17** (200 mg, 0.716 mmol, 1.0 equiv.), and ammonium formate (451 mg, 7.16 mmol, 10 equiv.), 4 Å MS in anhydrous MeOH under inert atmosphere along with 1 mL  $\text{NH}_3$  in MeOH. Then  $\text{NaBH}_3\text{CN}$  (136 mg, 2.15 mmol, 3.0 equiv.) was added to the reaction mixture at 0 °C, followed by addition of catalytic amount of TFA (20  $\mu\text{L}$ ). Then the reaction mixture stirred at 22 °C for 12 h. After complete consumption of starting material (monitored by TLC analysis) the crude reaction mixture was filtered and evaporated to dryness. Then, it was diluted with EtOAc (20 mL), and quenched with saturated  $\text{NaHCO}_3$  solution. The organic layer was extracted with EtOAc (20 mL X 2) and concentrated in rotary evaporator. The crude product was purified by flash

chromatography using 70% (EtOAc/hexane) - 5% (MeOH/CH<sub>2</sub>Cl<sub>2</sub>) eluent to afford of the pure desired product **12** (108 mg, 54%).

**Preparation of  $\alpha$ -Substituted enone (SI-3) via a One-Pot Protocol:**

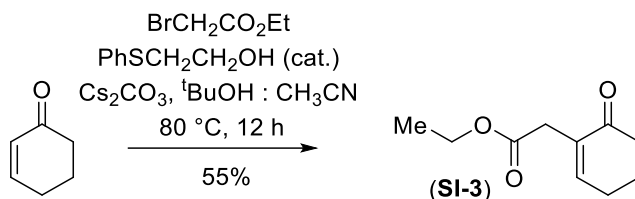

In a 100 mL oven dried round bottom flask, 2-cyclohexenone (1 gm, 10.4 mmol, 1.0 equiv.) was dissolved in 1:1 mixture of CH<sub>3</sub>CN: <sup>t</sup>BuOH 20 mL. Then, PhSCH<sub>2</sub>CH<sub>2</sub>OH (320 mg, 2.08 mmol, 0.2 equiv.) was added to the reaction mixture followed by addition of BrCH<sub>2</sub>COOEt (1.3 mL, 15.6 mmol, 1.5 equiv.) and Cs<sub>2</sub>CO<sub>3</sub> (6.8 gm, 20.8 mmol, 2.0 equiv.). Then the reaction mixture placed in a pre-heated oil bath at 80 °C, and stirring was continued at that temperature for 12 h. After complete consumption of starting material, the reaction mixture cooled down to room temperature and removed the solvent under reduced pressure. the reaction mixture was quenched with saturated NH<sub>4</sub>Cl and was extracted with EtOAc (30 mL X 2) and washed with brine (5 mL X 1). The combined organic layers were dried over Na<sub>2</sub>SO<sub>4</sub> and concentrated under reduced pressure. The crude product was purified by column chromatography (100–200 silica, 4-8% EtOAc/*n*-hexane) to furnish pure **SI-3** (10.4 mmol scale of reaction, 1.04 g of product, 55% yield).

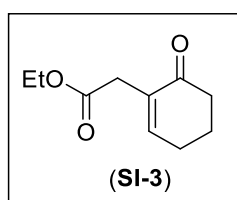

**Ethyl 2-(6-oxocyclohex-1-en-1-yl)acetate (SI-3):** Compound **SI-3** was obtained as a colorless oil (101 mmol scale of reaction, 10 gm of product, 70% yield);  $R_f = 0.5$  (20% EtOAc in *n*-hexane).

<sup>1</sup>H NMR (500 MHz, CDCl<sub>3</sub>):  $\delta$  6.88 (t,  $J = 4.3$  Hz, 1H), 4.14 (q,  $J = 7.1$  Hz, 2H), 3.20 (s, 2H), 2.52 – 2.45 (m, 2H), 2.43 (h,  $J = 4.5$  Hz, 2H), 2.05 (p,  $J = 6.3$  Hz, 2H), 1.26 (t,  $J = 7.1$  Hz, 3H).

$^{13}\text{C}$   $\{^1\text{H}\}$  NMR (100 MHz,  $\text{CDCl}_3$ ):  $\delta$  198.4, 171.5, 148.3, 133.7, 60.8, 38.1, 35.5, 26.2, 23.1, 14.3.

### Luche Reduction of $\alpha$ -substituted cyclohexanone (SI-3):

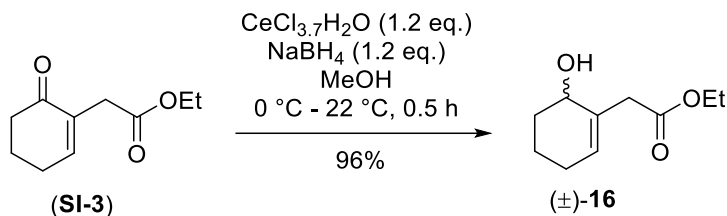

In an oven-dried round-bottom flask, enone **SI-3** (100 mg, 0.55 mmol, 1.0 equiv) was taken in  $\text{MeOH}$  (3 mL) and cooled to  $0\text{ }^\circ\text{C}$ . After 10 min of stirring,  $\text{CeCl}_3 \cdot 7\text{H}_2\text{O}$  (246 mg, 0.66 mmol, 1.2 equiv) was added portion-wise to the reaction mixture followed by slow addition of  $\text{NaBH}_4$  (25 mg, 0.66 mmol, 1.2 equiv.). After complete consumption of starting materials (confirmed by TLC analysis), the reaction mixture was quenched with saturated  $\text{NH}_4\text{Cl}$  and was extracted with  $\text{EtOAc}$  (5 mL X 2) and washed with brine (5 mL X 1). The combined organic layers were dried over  $\text{Na}_2\text{SO}_4$  and concentrated under reduced pressure. The crude product was purified by column chromatography (100–200 silica, 8%  $\text{EtOAc}/n$ -hexane) to furnish pure **16** (0.55 mmol scale of reaction, 99 mg of product, 98% yield).

### Catalytic Enantioselective Reduction of Enone (SI-3) using CBS Catalyst:

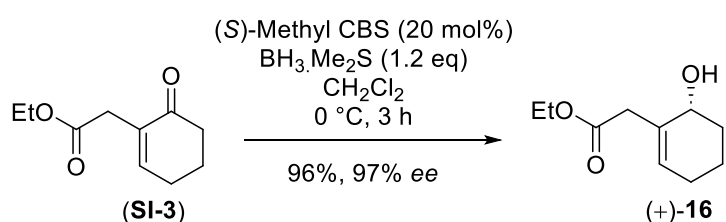

To a stirred solution of  $(S)$ -CBS [1.1 mL (1M in toluene), 1.092 mmol, 0.2 equiv.] in dry  $\text{CH}_2\text{Cl}_2$  (15 mL) was added  $\text{BH}_3 \cdot \text{Me}_2\text{S}$  [1.93 mL (1M in THF), 6.576 mmol, 1.2 equiv] dropwise at  $25\text{ }^\circ\text{C}$ . After 10 min of stirring at this temperature, the reaction mixture transferred to  $0\text{ }^\circ\text{C}$  chiller, then a solution of enone **SI-3** (1 gm, 5.48 mmol, 1.0 equiv.) in  $\text{CH}_2\text{Cl}_2$  (5 mL) was added slowly by a syringe pump over 3 h. Following completion of the reaction, the reaction mixture was quenched with 2(*M*)  $\text{HCl}$  (10 mL) and extracted with  $\text{CH}_2\text{Cl}_2$  (15 mL X 2). The combined organic layers were dried over  $\text{Na}_2\text{SO}_4$  and concentrated in vacuo under

reduced pressure. The crude mixture was purified by chromatography (100–200 mesh silica, 8% EtOAc/n-hexane) to give enantiopure compound (+)-**16** as a colourless gel (969 mg, 96% yield, 96% *ee*). [The catalytic enantioselective reduction of **11b** with (*S*)-CBS in 2.5 gm scale afforded product in 91% yield and 94% *ee*]. As this is compound is not UV active HPLC done after making benzoate derivative.

#### Detail Optimization Table for enantioselective CBS Reduction of Enone:<sup>a</sup>

| ( <i>S</i> )-CBS | Solvent                             | Temp        | Time       | Yield <sup>b</sup> | <i>ee</i> <sup>c</sup> |
|------------------|-------------------------------------|-------------|------------|--------------------|------------------------|
| 50 mol%          | THF                                 | 22 °C       | 4 h        | 92%                | 84%                    |
| 20 mol%          | THF                                 | 22 °C       | 6 h        | 90%                | 86%                    |
| 20 mol%          | THF                                 | 0 °C        | 9 h        | 85%                | 88%                    |
| 20 mol%          | CH <sub>2</sub> Cl <sub>2</sub>     | 22 °C       | 3 h        | 96%                | 93%                    |
| <b>20 mol%</b>   | <b>CH<sub>2</sub>Cl<sub>2</sub></b> | <b>0 °C</b> | <b>3 h</b> | <b>95%</b>         | <b>96%</b>             |
| 20 mol%          | CH <sub>2</sub> Cl <sub>2</sub>     | -10 °C      | 12 h       | 90%                | 94%                    |
| 10 mol%          | CH <sub>2</sub> Cl <sub>2</sub>     | 0 °C        | 5 h        | 93%                | 94%                    |

<sup>a</sup>All reactions were carried out using 0.25 mmol of **SI-3** with 1.2 equiv. Of BH<sub>3</sub>.Me<sub>2</sub>S.

<sup>b</sup>Yields are reported after column chromatography. <sup>c</sup>HPLC analysis were done using ChiralPak IC-3 column, after making 4-Nitrobenzoate derivative.

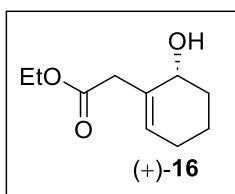

**Ethyl (*R*)-2-(6-hydroxycyclohex-1-en-1-yl)acetate [(+)-**16**]:** Compound (+)-**16** was obtained as a colorless oil (5.48 mmol scale of reaction, 969 mg of product, 96% yield); *R<sub>f</sub>* = 0.47 (20% EtOAc in *n*-hexane).

<sup>1</sup>H NMR (500 MHz, CDCl<sub>3</sub>): δ 5.70 (d, *J* = 4.1 Hz, 1H), 4.15 (p, *J* = 7.7 Hz, 3H), 3.25 (d, *J* = 15.9 Hz, 1H), 3.04 (d, *J* = 15.9 Hz, 1H), 2.29 – 1.98 (m, 1H), 1.98 (s, 1H), 1.82 – 1.71 (m, 3H), 1.60 (dd, *J* = 9.8, 4.6 Hz, 1H), 1.28 (t, *J* = 7.2 Hz, 3H).

<sup>13</sup>C {<sup>1</sup>H} NMR (100 MHz, CDCl<sub>3</sub>): δ 173.6, 132.9, 130.3, 67.5, 61.1, 40.9, 32.0, 25.7, 18.1, 14.3.

$[\alpha]_D^{25.0} = +94.60$  ( $c = 0.05$  g/mL,  $\text{CHCl}_3$ )

### Preparation of 4-nitro benzoate Derivative (SI-4):

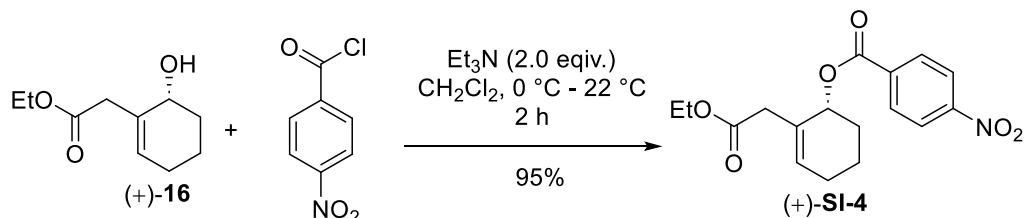

In an oven-dried round-bottom flask, enol (+)-**16** (50 mg, 0.274 mmol, 1.0 equiv.) was taken in  $\text{CH}_2\text{Cl}_2$  (3 mL) and cooled to 0 °C. Triethylamine (76  $\mu\text{L}$ , 0.548 mmol, 2.0 equiv.) was added to the reaction mixture. After 5 min of stirring, 4-nitro benzoyl chloride (76 mg, 0.411 mmol, 1.5 equiv.) was added to the reaction mixture and stirred the reaction mixture further 2 h at 22 °C. After complete consumption of starting materials (confirmed by TLC), the reaction mixture was quenched with saturated  $\text{NH}_4\text{Cl}$  and was extracted with  $\text{CH}_2\text{Cl}_2$  (5 mL X 2) and washed with brine (5 mL X 1). The combined organic layers were dried over  $\text{Na}_2\text{SO}_4$  and concentrated under reduced pressure. The crude product was purified by column chromatography (100–200 silica, 5% EtOAc/*n*-hexane) to furnish pure (+)-**SI-4** (0.274 mmol scale of reaction, 86 mg of product, 95% yield).

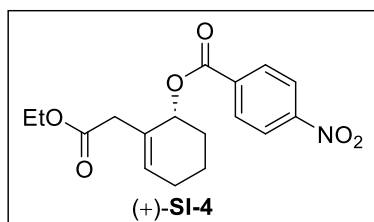

**(R)-2-(2-Ethoxy-2-oxoethyl)cyclohex-2-en-1-yl 4-nitrobenzoate [(+)-SI-4]:** Compound (+)-**SI-4** was obtained as a yellowish semi solid (0.274 mmol scale of reaction, 86 mg of product, 95% yield);  $R_f = 0.55$  (20% EtOAc in *n*-hexane).

**<sup>1</sup>H NMR** (500 MHz,  $\text{CDCl}_3$ )  $\delta$  8.30 (d,  $J = 8.8$  Hz, 2H), 8.23 (d,  $J = 8.9$  Hz, 2H), 6.00 (t,  $J = 3.9$  Hz, 1H), 5.67 (d,  $J = 4.8$  Hz, 2H), 4.15 – 3.94 (m, 2H), 3.14 (dd,  $J = 15.8, 1.9$  Hz, 1H), 3.02 (d,  $J = 15.6$  Hz, 1H), 2.34 – 2.21 (m, 1H), 2.14 (d,  $J = 17.4$  Hz, 1H), 2.02 – 1.97 (m, 2H), 1.80 – 1.70 (m, 2H), 1.18 (t,  $J = 7.1$  Hz, 3H).

$^{13}\text{C}$   $\{^1\text{H}\}$  NMR (126 MHz,  $\text{CDCl}_3$ )  $\delta$  171.4, 164.3, 150.6, 136.0, 133.1, 130.7, 128.9, 123.5, 71.3, 60.7, 40.0, 28.8, 25.29, 18.1, 14.1.

HRMS (ESI-TOF)  $m/z$ :  $[\text{M}+\text{H}]^+$  Calcd for  $[\text{C}_{17}\text{H}_{19}\text{NO}_6 + \text{Na}]^+$  356.1105; Found 356.1088.

$[\alpha]_{\text{D}}^{25.0} = +114.00$  ( $c = 0.05$  g/mL,  $\text{CHCl}_3$ )

Enantiomeric excess of pure compound was determined via HPLC analysis using a Chiralpak IC-3 column; solvent: hexane/2-propanol = 85/15; flow rate: 1.0 mL/min; detection: at 254 nm):  $t_{\text{R}}$  minor = 15.760 min,  $t_{\text{R}}$  major = 18.118 min.  $[\alpha]_{\text{D}}^{25.0} = +114.00$  ( $c = 0.05$  g/ml,  $\text{CHCl}_3$ ) for 96% ee).

#### Mitsunobu Reaction of enantioenriched enol (+)-**16** with iodo compound (**15**):

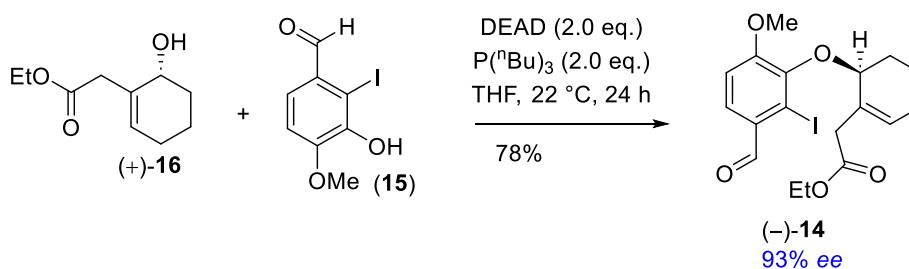

An oven-dried round bottom flask was charged with compound **15** (1.54 gm, 6.34 mmol, 1.3 equiv.) and tributyl phosphine (2.45 ml, 9.76 mmol, 2.0 equiv.) in 20 mL of dry THF under nitrogen atmosphere. To this, a solution of compound (+)-**16** (900 mg, 4.88 mmol, 1.0 equiv.) in dry THF (10 mL), was added dropwise at 0 °C. After 10 min of stirring, DEAD (1.53 mL, 9.76 mmol, 2.0 equiv.) was added to the reaction mixture dropwise at 0 °C. Then the resulting yellow solution was allowed to warm to room temperature and stirred in the same temperature for 26 h. After completion of the starting material, the reaction mixture concentrated under reduced pressure. The resulting mixture was extracted with EtOAc (2 X 50 mL) and the combined organic layers were dried over anhydrous  $\text{Na}_2\text{SO}_4$ , filtered, and concentrated in a rotary evaporator under reduced pressure. The residue thus obtained was subjected to flash chromatography (silica; 4% EtOAc/hexane to 12% EtOAc/hexane) and (-)-**14** (1.69 g, 78 %) was obtained as colour less oil after concentration of the appropriate fraction.

Compound (-)-**14** was crystallized via slow evaporation for 7 days in CDCl<sub>3</sub> and *i*-PrOH solvent.

**Optimization Table for Mitsunobu reaction:<sup>a</sup>**

| Entry | <b>15</b><br>(equiv.) | Azo<br>dicarboxylate | Phosphine                        | Solvent           | Temp. | Time | Yield <sup>b</sup> | <i>ee</i> <sup>c</sup> |
|-------|-----------------------|----------------------|----------------------------------|-------------------|-------|------|--------------------|------------------------|
| 1.    | 1.0                   | DIAD                 | PPh <sub>3</sub>                 | THF               | 22 °C | 48 h | 20%                |                        |
| 2.    | 2.0                   | DIAD                 | PPh <sub>3</sub>                 | THF               | 65 °C | 36 h | 52%                | 82%                    |
| 3.    | 2.0                   | DIAD                 | PCy <sub>3</sub>                 | THF               | 22 °C | 30 h | 55%                | 90%                    |
| 4.    | 1.2                   | DEAD                 | PPh <sub>3</sub>                 | THF               | 22 °C | 48 h | 65%                | 84%                    |
| 5.    | 1.2                   | DEAD                 | P( <sup>n</sup> Bu) <sub>3</sub> | THF               | 22 °C | 24 h | 78%                | 93%                    |
| 6.    | 1.2                   | DEAD                 | P( <sup>n</sup> Bu) <sub>3</sub> | THF               | 0 °C  | 40 h | 58%                | 93%                    |
| 7.    | 1.2                   | DEAD                 | P( <sup>n</sup> Bu) <sub>3</sub> | PhMe              | 22 °C | 30 h | 70%                | 91%                    |
| 8.    | 1.2                   | DEAD                 | P( <sup>n</sup> Bu) <sub>3</sub> | PhMe:<br>THF(1:1) | 22 °C | 30 h | 70%                | 92%                    |
| 9.    | 1.2                   | DBAD                 | P( <sup>n</sup> Bu) <sub>3</sub> | THF               | 22 °C | 36 h | 62%                | 88%                    |
| 10.   | 1.2                   | D'BAD                | PPh <sub>3</sub>                 | THF               | 22 °C | 48 h | 47%                |                        |

<sup>a</sup>Reactions were carried out with 0.3 mmol (1.0 equiv.) of **16**. <sup>b</sup>Yields are reported after purification.

<sup>c</sup>Enantiomeric excess was determined using chiralpak OD-H column of pure (-)-**16**.

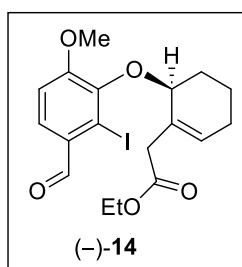

**Ethyl (*S*)-2-(6-(3-formyl-2-iodo-6-methoxyphenoxy)cyclohex-1-en-1-yl)acetate [(-)-**14**]:**

Compound (-)-**14** [CCDC: **2384521**] was obtained as colourless liquid [4.88 mmol scale of reaction, 1.69 g of product, 78% yield; *R*<sub>f</sub> = 0.5 (20% EtOAc in hexane)].

<sup>1</sup>H NMR (500 MHz, CDCl<sub>3</sub>): δ 10.08 (s, 1H), 7.70 (d, *J* = 8.4 Hz, 1H), 6.98 (d, *J* = 8.6 Hz, 1H), 5.92 (t, *J* = 3.7 Hz, 1H), 5.04 (d, *J* = 4.4 Hz, 1H), 4.36 – 4.08 (m, 2H), 3.92 (s, 3H), 3.58 (d, *J* = 16.4 Hz, 1H), 3.14 (d, *J* = 16.4 Hz, 1H), 2.30 – 2.07 (m, 3H), 1.98 (m, 1H), 1.62 (m, 1H), 1.60 – 1.55 (m, 1H), 1.29 (t, *J* = 7.1 Hz, 3H).



$^{13}\text{C}$   $\{^1\text{H}\}$  NMR (126 MHz,  $\text{CDCl}_3$ ):  $\delta$  191.1, 170.8, 149.8, 148.6, 132.9, 130.2, 128.5, 128.3, 126.9, 110.2, 86.0, 60.2, 56.0, 48.6, 41.1, 23.7, 18.9, 14.0.

IR (film) $\nu_{\text{max}}$ : 2940, 2902, 1742, 1683, 1580, 1321, 1026, 928  $\text{cm}^{-1}$ .

HRMS (ESI-TOF)  $m/z$ :  $[\text{M}+\text{H}]^+$  Calcd for  $[\text{C}_{18}\text{H}_{21}\text{IO}_5 + \text{H}]^+$  467.0331; Found 467.0330.

$[\alpha]_{\text{D}}^{25.0} = -77.00$  ( $c = 0.02$  g/ml,  $\text{CHCl}_3$ )

Enantiomeric excess of was determined via HPLC analysis using a Chiralpak OD-H column; [solvent: hexane/2-propanol = 90/10; flow rate: 1.0 mL/min; detection: at 254 nm):  $t_{\text{R}}$  minor = 11.843 min,  $t_{\text{R}}$  major = 12.995 min.  $[\alpha]_{\text{D}}^{25.0} = -77.00$  ( $c = 0.02$  g/ml,  $\text{CHCl}_3$ ) for 93% ee].

#### Intramolecular Heck Coupling of Compound [(-)-14]:

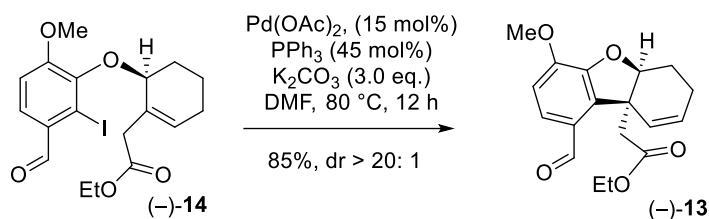

Compound (-)-**14** (1.3 g, 2.93 mmol, 1.0 equiv.) and  $\text{K}_2\text{CO}_3$  (1.21 g, 8.79 mmol, 3.0 equiv.) was taken in a sealed tube and 10 mL of anhydrous DMF was added to it under nitrogen atmosphere. Then the reaction mixture was degassed with  $\text{N}_2$ -balloon for 10 min. Next,  $\text{Pd}(\text{OAc})_2$  (98 mg, 0.439 mmol, 0.15 equiv.) and  $\text{PPh}_3$  (346 mg, 1.319 mmol, 0.45 equiv.) were added to the reaction mixture under nitrogen atmosphere. Next, the sealed tube was capped and heated the reaction mixture at 80 °C for 12 h. Upon completion of the reaction (judged by TLC analysis), it was diluted with 40% EtOAc in *n*-hexane (10 mL) and 25 mL  $\text{H}_2\text{O}$ . The resulting mixture was extracted with 40% EtOAc in hexane (2 X 30 mL) and the combined organic layers were dried over anhydrous  $\text{Na}_2\text{SO}_4$ , filtered, and concentrated in a rotary evaporator under reduced pressure. The crude product was purified by flash chromatography using EtOAc/*n*-hexane as eluents to afford (-)-**13** as a yellowish liquid (787 mg, 85% yield).

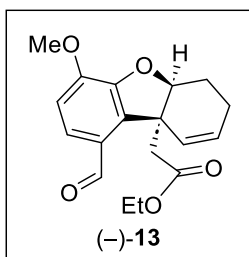

**Ethyl 2-((5a*S*,9a*S*)-1-formyl-4-methoxy-6,7-dihydrodibenzo[*b,d*]furan-9a(5a*H*)-yl)acetate**

[(-)-**13**]: Compound (-)-**13** was obtained as yellowish liquid (2.39 mmol scale of reaction, 787 mg of product, 85% yield);  $R_f = 0.48$  (20% EtOAc in hexane).

**$^1\text{H}$  NMR** (500 MHz,  $\text{CDCl}_3$ ):  $\delta$  9.84 (s, 1H), 7.33 (d,  $J = 8.4$  Hz, 1H), 6.88 (d,  $J = 8.3$  Hz, 1H), 6.08 (ddt,  $J = 10.2, 2.5, 1.2$  Hz, 1H), 5.89 – 5.83 (m, 1H), 5.17 (t,  $J = 3.6$  Hz, 1H), 3.98 (q,  $J = 7.1$  Hz, 2H), 3.95 (s, 3H), 3.40 (d,  $J = 15.1$  Hz, 1H), 2.85 (d,  $J = 15.2$  Hz, 1H), 2.31 – 2.24 (m, 1H), 2.20 (m, 1H), 2.02 – 1.95 (m, 1H), 1.88 (m, 1H), 1.09 (t,  $J = 7.1$  Hz, 3H).

**$^{13}\text{C}$  { $^1\text{H}$ } NMR** (126 MHz,  $\text{CDCl}_3$ ):  $\delta$  191.1, 171.0, 149.9, 148.7, 133.1, 130.3, 128.6, 128.45, 127.0, 110.4, 86.1, 60.3, 56.2, 48.7, 41.3, 23.9, 19.1, 14.2.

**IR** (film) $\nu_{\text{max}}$ : 2942, 1740, 1682, 1576, 1286, 1205, 928, 732  $\text{cm}^{-1}$ .

**HRMS** (ESI-TOF)  $m/z$ :  $[\text{M}+\text{Na}]^+$  Calcd for  $[\text{C}_{18}\text{H}_{20}\text{O}_5 + \text{Na}]^+$  339.1208; Found 339.1224.

$[\alpha]_{\text{D}}^{25.0} = -72.50$  ( $c = 0.025$  g/ml,  $\text{CHCl}_3$ )

**Preparation of bis-aldehyde compound [(-)-**10**]:**

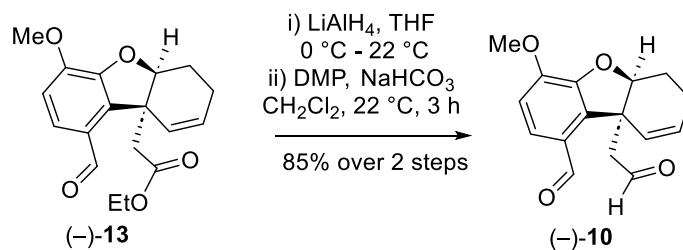

In an oven dried round bottom flask, compound (-)-**13** (300 mg, 0.948 mmol, 1.0 equiv.) was dissolved in dry THF (10 mL) under nitrogen atmosphere. To this solution,  $\text{LiAlH}_4$  (72 mg, 1.9 mmol, 2.0 equiv.) was added slowly at 0 °C. After stirring 30 minutes at 0 °C, the reaction

mixture was diluted with EtOAc (10 mL), and quenched with 10% aq. NaOH solution. The organic layer was extracted with EtOAc (2 X 20 mL) and the combined organic layers were dried over anhydrous Na<sub>2</sub>SO<sub>4</sub>, filtered, and concentrated in a rotary evaporator under reduced pressure. The crude product was directly charged for next steps.

The crude product was dissolved in CH<sub>2</sub>Cl<sub>2</sub> (10 mL) in a round bottom flask and DMP (Dess-Martin Periodinane reagent) (456 mg, 0.948 mmol, 1.0 equiv.) and NaHCO<sub>3</sub> (90 mg, 0.948 mmol, 1.0 equiv.) was added to the reaction mixture and stirring continued for 2.5 h at room temperature. After complete consumption of starting material (TLC analysis), the reaction mixture diluted with CH<sub>2</sub>Cl<sub>2</sub> (10 mL) and quenched with saturated Na<sub>2</sub>S<sub>2</sub>O<sub>3</sub> solution. The organic layer was extracted with CH<sub>2</sub>Cl<sub>2</sub> (2 X 10 mL) and concentrated in a rotary evaporator under reduced pressure. The crude product was purified by flash chromatography using 12% EtOAc/hexane as eluent to afford desired product (–)-**10** (219 mg, 85%).

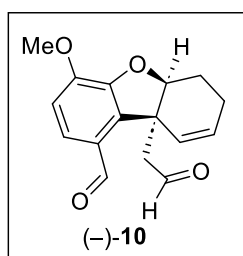

**(5a*S*,9a*S*)-4-Methoxy-9a-(2-oxoethyl)-5a,6,7,9a-tetrahydrodibenzo[*b,d*]furan-1-carbaldehyde [(–)-**10**]:** Compound (–)-**10** was obtained as yellowish liquid (0.948 mmol scale of reaction, 219 mg of product, 85% yield);  $R_f = 0.5$  (30% EtOAc in hexane).

**<sup>1</sup>H NMR** (500 MHz, CDCl<sub>3</sub>):  $\delta$  9.82 (s, 1H), 9.67 (t,  $J = 2.4$  Hz, 1H), 7.37 (d,  $J = 8.4$  Hz, 1H), 6.93 (d,  $J = 8.3$  Hz, 1H), 6.11 (ddt,  $J = 10.0, 2.5, 1.1$  Hz, 1H), 5.89 (ddd,  $J = 9.8, 5.4, 2.3$  Hz, 1H), 4.92 (t,  $J = 3.6$  Hz, 1H), 3.98 (s, 3H), 3.48 (dd,  $J = 16.3, 2.4$  Hz, 1H), 3.05 (dd,  $J = 16.3, 2.4$  Hz, 1H), 2.39 – 2.19 (m, 2H), 2.08 – 1.98 (m, 1H), 1.93 – 1.80 (m, 1H).

**<sup>13</sup>C {<sup>1</sup>H} NMR** (126 MHz, CDCl<sub>3</sub>):  $\delta$  201.4, 191.5, 150.3, 148.9, 132.3, 131.5, 128.6, 127.93, 126.8, 110.6, 86.6, 56.2, 50.1, 48.0, 23.4, 19.0.

**IR** (film) $\nu_{\max}$ : 2904, 1682, 1670, 1452, 1321 cm<sup>-1</sup>.

$[\alpha]_D^{25.0} = -62.50$  ( $c = 0.025$  g/ml,  $\text{CHCl}_3$ )

### DIBAL-H Reduction (–)-13:

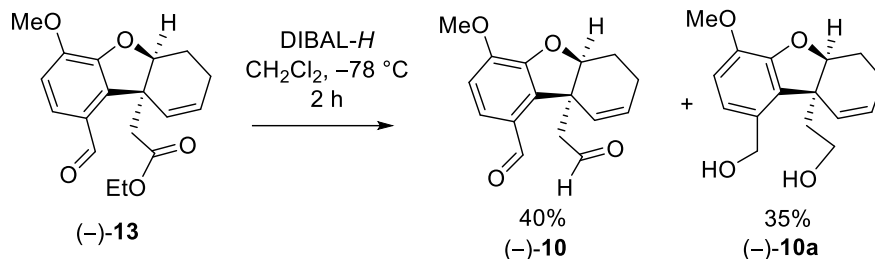

In an oven dried round bottom flask compound (–)-13 (100 mg, 0.316 mmol, 1.0 equiv.) was dissolved in dry  $\text{CH}_2\text{Cl}_2$  (3 mL) under nitrogen atmosphere. To that solution 1(*M*) DIBAL-H in PhMe (316  $\mu\text{L}$  mg, 0.316 mmol, 1.0 equiv.) was added slowly at  $-78^\circ\text{C}$ . After stirring 2 h at  $-78^\circ\text{C}$  the reaction mixture was diluted with  $\text{CH}_2\text{Cl}_2$  (3 mL), and quenched with aq. Rochelle's salt solution. The organic layer was extracted with  $\text{CH}_2\text{Cl}_2$  (2 X 10 mL) and the combined organic layers were dried over anhydrous  $\text{Na}_2\text{SO}_4$ , filtered, and concentrated in a rotary evaporator under reduced pressure. The crude product was purified by flash chromatography to afford 40% yield of (–)-10 and 35% yield of (–)-10a (30 mg).

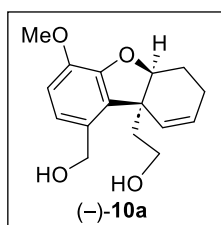

**2-((5a*S*,9a*S*)-1-(Hydroxymethyl)-4-methoxy-6,7-dihydrodibenzo[*b,d*]furan-9a(5a*H*)-yl)ethan-1-ol [(–)-10a]:** Compound (–)-10a was obtained as colourless gel (0.316 mmol scale of reaction, 30 mg of product, 35% yield);  $R_f = 0.1$  (30% EtOAc in *n*-hexane).

**$^1\text{H NMR}$**  (400 MHz,  $\text{CDCl}_3$ ):  $\delta$  6.78 (d,  $J = 8.3$  Hz, 1H), 6.69 (d,  $J = 8.3$  Hz, 1H), 5.79 (d,  $J = 1.4$  Hz, 2H), 4.78 – 4.75 (m, 1H), 4.66 (d,  $J = 12.1$  Hz, 1H), 4.52 (dd,  $J = 12.1, 0.5$  Hz, 1H), 3.83 (s, 3H), 3.64 (td,  $J = 6.6, 2.7$  Hz, 2H), 2.23 – 2.14 (m, 3H), 2.05 – 1.99 (m, 1H), 1.98 – 1.91 (m, 1H), 1.83 – 1.74 (m, 1H).

$^{13}\text{C}$   $\{^1\text{H}\}$  NMR (101 MHz,  $\text{CDCl}_3$ ):  $\delta$  147.4, 144.8, 131.8, 130.1, 129.3, 127.8, 122.7, 111.1, 85.1, 61.9, 59.4, 55.9, 49.1, 40.5, 24.1, 19.6.

IR (film) $\nu_{\text{max}}$ : 3560, 2982, 1470, 1281, 1084, 760  $\text{cm}^{-1}$ .

HRMS (ESI-TOF)  $m/z$ :  $[\text{M}+\text{Na}]^+$  Calcd for  $[\text{C}_{16}\text{H}_{20}\text{O}_4 + \text{Na}]^+$  299.1259; Found 299.1263.

### Sequential double reductive amination of bis-aldehyde [(-)-10] with galanthindolyl benzylic amine ( $\pm$ )-12:

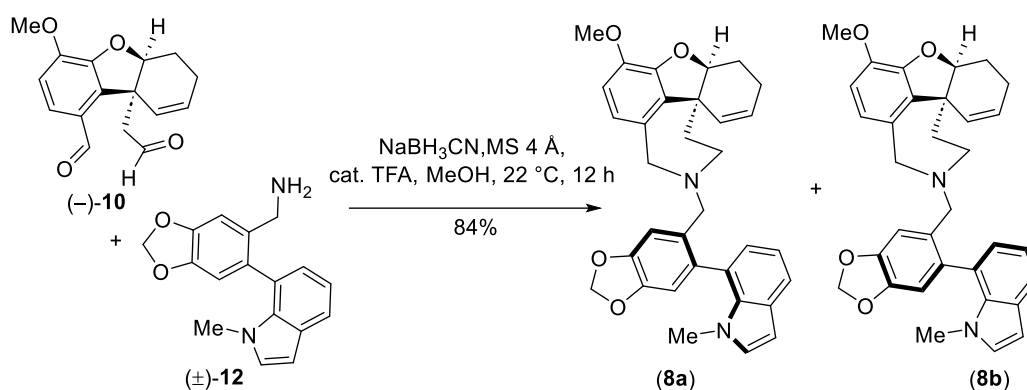

An oven dried round bottom flask was charged with bis-aldehyde compound (-)-10 (200 mg, 0.734 mmol, 1.0 equiv.), and benzylic amine ( $\pm$ )-12 (206 mg, 0.734 mmol, 1.0 equiv.), 4 Å MS in anhydrous MeOH under inert atmosphere. Then,  $\text{NaBH}_3\text{CN}$  (139 mg, 2.2 mmol, 3.0 equiv.) was added to the reaction mixture at 0 °C, followed by addition of catalytic amount of TFA (20  $\mu\text{L}$ ). Then the reaction mixture stirred at 22 °C for 12 h. After complete consumption of starting material (monitored by TLC analysis), the crude reaction mixture was filtered and evaporated to dryness. Then it was diluted with EtOAc (20 mL), and quenched with saturated  $\text{NaHCO}_3$  solution. The organic layer was extracted with EtOAc (20 mL X 2) and concentrated in rotary evaporator. The crude product was purified by flash chromatography using 12% (EtOAc/hexane) eluent to afford of the pure desired product (-)-8 (321 mg, 84%) as a 1:1 diastereomeric mixtures (8a and 8b). The diastereomeric mixture is inseparable in column chromatography (TLC showed single spot).

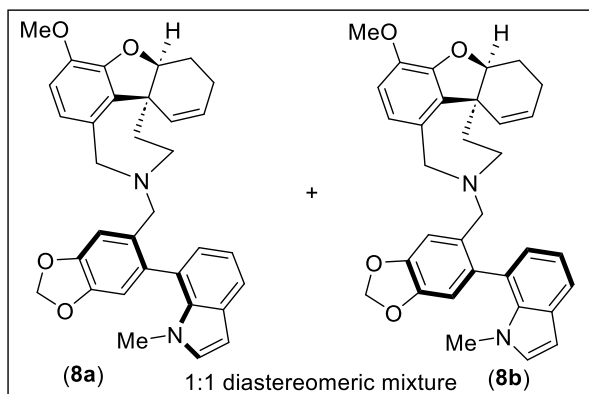

(4*aS*,8*aS*)-3-Methoxy-11-((6-(1-methyl-1*H*-indol-7-yl)benzo[*d*][1,3]dioxol-5-yl)methyl)-4*a*,5,9,10,11,12-hexahydro-6*H*-benzo[2,3]benzofuro[4,3-*cd*]azepine [(-)-**8**]: Compound (-)-**8** was obtained as 1:1 diastereomeric ratio, yellowish liquid (0.734 mmol scale of reaction, 321 mg of product, 84% yield);  $R_f = 0.48$  (20% EtOAc in hexane). NMR is reported as 1:1 diastereomeric mixtures.

<sup>1</sup>H NMR (500 MHz, CDCl<sub>3</sub>) [1:1 dr of **8a** and **8b**]:  $\delta$  7.59 (t,  $J = 7.6$  Hz, 2H), 7.09 (d,  $J = 7.5$  Hz, 1H), 7.07 – 7.03 (m, 2H), 7.01 (d,  $J = 7.5$  Hz, 1H), 6.95 (d,  $J = 3.1$  Hz, 1H), 6.92 (d,  $J = 7.0$  Hz, 1H), 6.90 (d,  $J = 3.1$  Hz, 1H), 6.83 (s, 2H), 6.79 (d,  $J = 7.3$  Hz, 1H), 6.63 (d,  $J = 8.1$  Hz, 1H), 6.55 (d,  $J = 8.1$  Hz, 1H), 6.51 (dd,  $J = 7.8, 3.1$  Hz, 2H), 6.43 (d,  $J = 8.1$  Hz, 1H), 6.34 (d,  $J = 8.1$  Hz, 1H), 6.09 – 6.01 (m, 4H), 5.91 (t,  $J = 8.2$  Hz, 2H), 5.74 (dt,  $J = 10.8, 5.6$  Hz, 2H), 4.43 (d,  $J = 14.4$  Hz, 2H), 3.87 (s, 3H), 3.84 (s, 3H), 3.53 (d,  $J = 14.7$  Hz, 1H), 3.46 (d,  $J = 16.4$  Hz, 1H), 3.31 (s, 3H), 3.29 – 3.23 (m, 2H), 3.21 (s, 3H), 3.09 – 2.93 (m, 2H), 2.70 (d,  $J = 14.1$  Hz, 1H), 2.55 (d,  $J = 14.8$  Hz, 1H), 2.35 (tq,  $J = 13.8, 8.1, 6.2$  Hz, 5H), 2.02 – 1.90 (m, 3H), 1.82 – 1.65 (m, 4H), 1.47 – 1.36 (m, 2H).

<sup>13</sup>C {<sup>1</sup>H} NMR (126 MHz, CDCl<sub>3</sub>) [1:1 dr of **8a** and **8b**]:  $\delta$  147.2, 147.0, 145.7, 141.6, 140.7, 134.7, 134.6, 134.0, 133.5, 130.53, 130.49, 129.6, 126.9, 126.3, 124.8, 124.1, 123.9, 121.2, 121.0, 120.2, 120.1, 119.0, 111.1, 110.8, 110.7, 109.2, 109.1, 101.2, 101.0, 100.95, 88.86, 88.84, 58.3, 57.5, 56.00, 55.96, 54.4, 52.1, 48.1, 48.0, 35.77, 35.75, 22.51, 22.45, 19.81.

IR (film) $\nu_{\max}$ : 2942, 1740, 1682, 1576, 1286, 1205, 928, 732 cm<sup>-1</sup>.

HRMS (ESI-TOF)  $m/z$ : [M+H]<sup>+</sup> Calcd for [C<sub>33</sub>H<sub>32</sub>N<sub>2</sub>O<sub>4</sub> + H]<sup>+</sup> 521.2440; Found 537.2448.

### Riley oxidation of indole ring of compound [(-)-8]:

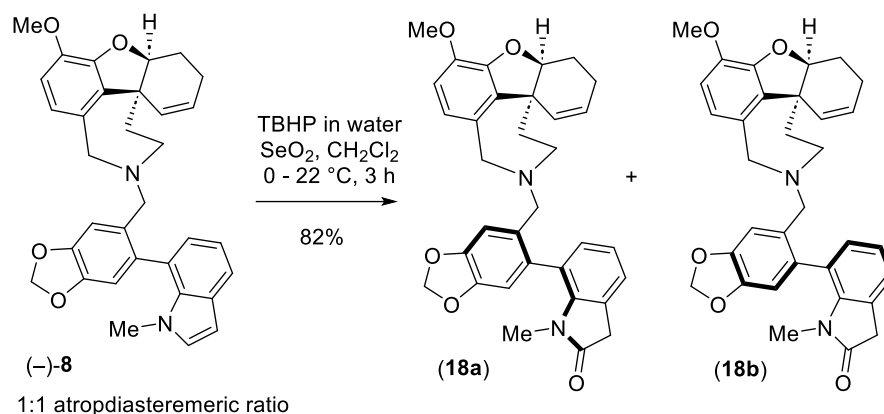

In an oven-dried round bottom flask was charged with compound **(-)-8** (1:1 diastereomeric mixtures), (250 mg, 0.48 mmol, 1.0 equiv.) and  $\text{SeO}_2$  (54 mg, 0.48 mmol, 1.0 equiv.) and TBHP in water (2 mL, 1.44 mmol, 3.0 equiv.) in 10 mL of  $\text{CH}_2\text{Cl}_2$  under nitrogen atmosphere. Then the reaction mixture was allowed to stir in room temperature for 3 h. After completion the reaction, it was quenched with saturated  $\text{NH}_4\text{Cl}$  solution and diluted with  $\text{CH}_2\text{Cl}_2$  (10 mL). The organic layer was extracted with  $\text{CH}_2\text{Cl}_2$  (10 mL X 2), and the combined organic layers were dried over anhydrous  $\text{Na}_2\text{SO}_4$ , filtered, and concentrated in a rotary evaporator under reduced pressure. The crude product was purified by flash chromatography using  $\text{EtOAc}/n$ -hexane as eluent to afford **(-)-18** as the desired product as a reddish liquid (210 mg, 82%) as 1:1 diastereomeric mixtures of **18a** and **18b**.

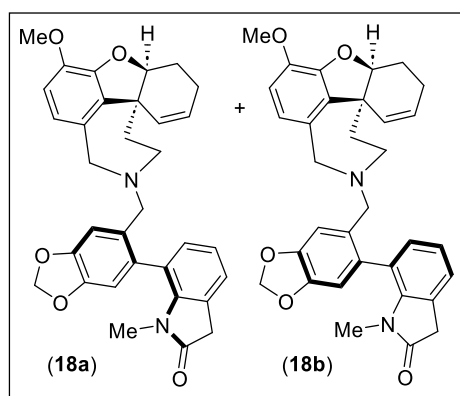

**7-(6-(((4*aS*,8*aR*)-3-Methoxy-4*a*,5,9,10-tetrahydro-6*H*-benzo[2,3]benzofuro[4,3-*cd*]azepin-11(12*H*)-yl)methyl)benzo[*d*][1,3]dioxol-5-yl)-1-methylindolin-2-one** [(-)-18]: Compound

(-)-**18** was obtained as 1:1 diastereomeric ratio, yellowish liquid (0.48 mmol scale of reaction, 210 mg of product, 82% yield);  $R_f = 0.35$  (30% EtOAc in hexane).

$^1\text{H NMR}$  (500 MHz,  $\text{CDCl}_3$ ) [1:1 dr of **18a** and **18b**]:  $\delta$  7.59 (td,  $J = 7.5, 1.4$  Hz, 2H), 7.37 – 7.33 (m, 1H), 7.19 (d,  $J = 7.0$  Hz, 1H), 7.10 (t,  $J = 7.5$  Hz, 1H), 7.03 (t,  $J = 7.5$  Hz, 1H), 6.93 (q,  $J = 4.7, 3.9$  Hz, 1H), 6.87 (s, 1H), 6.77 (d,  $J = 3.2$  Hz, 2H), 6.64 (d,  $J = 8.1$  Hz, 1H), 6.58 (d,  $J = 8.2$  Hz, 1H), 6.41 (d,  $J = 8.1$  Hz, 1H), 6.37 (d,  $J = 8.1$  Hz, 1H), 6.09 – 6.05 (m, 4H), 5.94 (t,  $J = 9.7$  Hz, 2H), 5.78 (dd,  $J = 10.6, 5.4$  Hz, 2H), 4.51 (d,  $J = 11.9$  Hz, 2H), 4.07 – 3.93 (m, 2H), 3.88 (s, 3H), 3.86 (s, 3H), 3.43 (d,  $J = 15.5$  Hz, 2H), 3.35 – 3.16 (m, 6H), 2.80 (s, 3H), 2.74 (s, 3H), 2.65 (s, 2H), 2.37 (q,  $J = 7.9, 5.3$  Hz, 5H), 2.11 – 1.96 (m, 3H), 1.89 (td,  $J = 13.1, 3.0$  Hz, 2H), 1.73 (dddd,  $J = 16.2, 10.8, 5.7, 3.1$  Hz, 4H), 1.50 – 1.42 (m, 2H).

Total number of hydrogens counts for 1:1 dr of **18a** and **18b**:

[ $\delta$  7.59 (td,  $J = 7.5, 1.4$  Hz, 2H), 7.37 – 7.33 (m, 1H), 7.19 (d,  $J = 7.0$  Hz, 1H), 7.10 (t,  $J = 7.5$  Hz, 1H), 7.03 (t,  $J = 7.5$  Hz, 1H), 6.93 (q,  $J = 4.7, 3.9$  Hz, 1H), 6.87 (s, 1H), 6.77 (d,  $J = 3.2$  Hz, 2H), 6.64 (d,  $J = 8.1$  Hz, 1H), 6.58 (d,  $J = 8.2$  Hz, 1H), 6.41 (d,  $J = 8.1$  Hz, 1H), 6.37 (d,  $J = 8.1$  Hz, 1H)]-14 aromatic proton,

{6.09 – 6.05 (m, 4H)}-methylene dioxy  $\text{CH}_2$ -proton,

{4.51 (d,  $J = 11.9$  Hz, 2H)}-hydrodibenzofuran core, *cis*-junction proton,

{3.88 (s, 3H), 3.86 (s, 3H)}-OMe-protons,

{2.80 (s, 3H), 2.74 (s, 3H)}-*N*-Me protons, which shows the environment of aromatic indole ring has been changed,

{4.07 – 3.93 (m, 2H), 3.46 (dd,  $J = 30.1, 14.8$  Hz, 2H), 3.35 – 3.16 (m, 6H), 2.65 (s, 2H), 2.37 (q,  $J = 7.9, 5.3$  Hz, 5H), 2.11 – 1.96 (m, 3H), 1.89 (td,  $J = 13.1, 3.0$  Hz, 2H), 1.73 (dddd,  $J = 16.2, 10.8, 5.7, 3.1$  Hz, 4H), 1.50 – 1.42 (m, 2H)}-28 aliphatic protons]

$^{13}\text{C}$   $\{^1\text{H}\}$  NMR (126 MHz,  $\text{CDCl}_3$ ) [1:1 dr of **18a** and **18b**]:  $\delta$  162.6, 159.2, 159.1, 148.9, 146.9, 141.0, 139.3, 137.9, 133.9, 129.0, 128.2, 125.3, 124.7, 123.1, 118.5, 114.1, 110.6, 109.9, 101.7, 88.8, 88.5, 56.0, 55.9, 52.4, 46.1, 40.9, 39.3, 36.6, 36.5, 33.8, 31.9, 29.4, 29.0, 27.4, 24.7, 23.3, 22.7, 22.3, 21.5, 19.6, 19.4.

DEPT-135 spectra shows 8 methylene ( $-\text{CH}_2$ ) carbon peaks.



**IR** (film) $\nu_{\text{max}}$ : 2942, 1740, 1682, 1576, 1286, 1205, 928, 732  $\text{cm}^{-1}$ .

**HRMS** (ESI-TOF)  $m/z$ :  $[\text{M}+\text{H}]^+$  Calcd for  $[\text{C}_{33}\text{H}_{32}\text{N}_2\text{O}_5 + \text{H}]^+$  537.2390; Found 537.2380.

$[\alpha]_{\text{D}}^{25.0} = -22.50$  ( $c = 0.025$  g/mL,  $\text{CHCl}_3$ )

### Allylic Oxidation of Compound (–)-13:

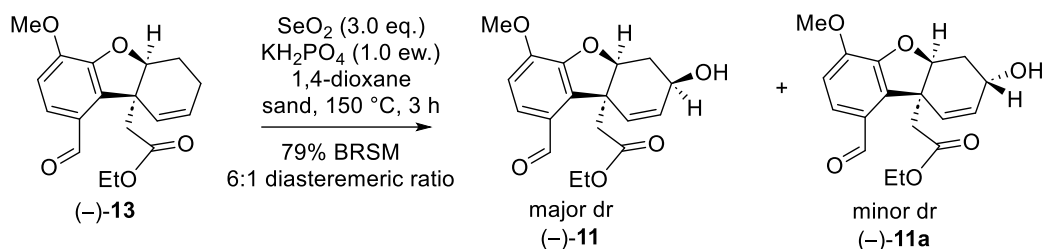

An oven dried sealed tube was charged with alkene (–)-13 (400 mg, 1.26 mmol, 1.0 equiv.), anhydrous monobasic potassium hydrogen phosphate (171 mg, 1.26 mmol, 1.0 equiv.), oven dried quartz sand (700 mg) and anhydrous dioxane (4 mL) under  $\text{N}_2$  atmosphere. Degassed the solution for 10 min using  $\text{N}_2$ -balloon. Then finely grounded selenium dioxide (140 mg, 1.26 mmol, 1.0 equiv.), was added to the solution and it was immersed in a 150 °C oil bath. After stirring for 1 h, more selenium dioxide (140 mg, 1.26 mmol, 1.0 equiv.) and quartz sand (700 mg) was added under  $\text{N}_2$  atmosphere. The solution was stirred for an additional 1 h. Then again to the solution was added more selenium dioxide (140 mg, 1.26 mmol, 1.0 equiv.) and quartz sand (700 mg). The solution was stirred for an additional 1 h and was filtered through a short silica gel path and washed with ethyl acetate. The organic solvent was evacuated under vacuum and the resulting yellow oil was dissolved in ethyl acetate and washed with 1N aqueous NaOH. The aqueous layer was extracted with ethyl acetate. The combined organic layers were dried over sodium sulfate and concentrated in vacuo. The resulting slightly yellow oil was purified by flash chromatography (40% to 60% EtOAc in *n*-hexane) to give 130 mg (30% yield) of the starting material followed by 248 mg (60% yield, dr ~6:1) of the allylic alcohol. The SM further charge for recycle and BRSM yield up to 79% yield.

| Reaction Condition |
|--------------------|
|--------------------|

|                                                                                          |                            |
|------------------------------------------------------------------------------------------|----------------------------|
| SeO <sub>2</sub> (1.2 equiv.), CH <sub>3</sub> COOH, 100 °C, 8 h                         | SM decomposed              |
| SeO <sub>2</sub> (1.5 equiv.), 1,4-dioxane, 100 °C, 12 h                                 | No reaction                |
| SeO <sub>2</sub> (1.0 equiv.), TBHP (2.5 equiv.), CH <sub>2</sub> Cl <sub>2</sub> , 24 h | No reaction                |
| SeO <sub>2</sub> (1.5 equiv.), 150 °C, 1,4-dioxane                                       | 30% product + SM recovered |

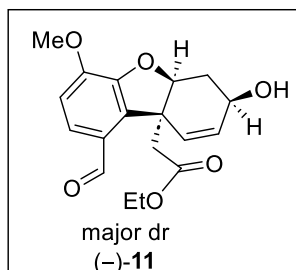

**Ethyl 2-((5a*S*,7*R*,9a*S*)-1-formyl-7-hydroxy-4-methoxy-6,7-dihydrodibenzo[*b,d*]furan-9a(5a*H*)-yl)acetate [(-)-**11**]:** Compound (-)-**11** was obtained as colourless liquid [1.26 mmol scale of reaction, 330 mg of product, 79% yield (BRSM)], 6:1 inseparable diastereomeric mixture;  $R_f = 0.35$  (40% EtOAc in *n*-hexane). NMR is reported for the major diastereomer.

**<sup>1</sup>H NMR** (500 MHz, CDCl<sub>3</sub>): δ 9.86 (s, 1H), 7.41 (d,  $J = 8.4$  Hz, 1H), 6.93 (d,  $J = 8.3$  Hz, 1H), 6.21 (dt,  $J = 10.2, 1.1$  Hz, 1H), 6.01 (dd,  $J = 10.2, 4.6$  Hz, 1H), 5.23 – 5.17 (m, 1H), 4.24 (q,  $J = 4.4$  Hz, 1H), 4.00 (q,  $J = 7.1$  Hz, 2H), 3.96 (s, 3H), 3.41 (d,  $J = 15.4$  Hz, 1H), 2.80 (d,  $J = 15.5$  Hz, 1H), 2.51 – 2.38 (m, 1H), 2.21 (m, 1H), 1.12 (t,  $J = 7.1$  Hz, 3H).

**<sup>13</sup>C {<sup>1</sup>H} NMR** (126 MHz, CDCl<sub>3</sub>): δ 191.2, 170.5, 150.1, 147.6, 131.9, 131.2, 129.5, 128.54, 126.9, 110.5, 85.3, 62.2, 60.4, 56.1, 48.8, 39.6, 31.6, 14.0.

**IR** (film) $\nu_{\max}$ : 3423, 2902, 1738, 1684, 1600, 1508, 1432. 1285, 1110, 976, 762 cm<sup>-1</sup>.

**HRMS** (ESI-TOF)  $m/z$ : [M+Na]<sup>+</sup> Calcd for [C<sub>18</sub>H<sub>20</sub>O<sub>6</sub> + Na]<sup>+</sup> 355.1152; Found 355.1136.

$[\alpha]_D^{25.0} = -38.25$  ( $c = 0.04$  g/ml, CHCl<sub>3</sub>)

**Reductive amination and Lactamization cascade of ester-aldehyde (11) with MeNH<sub>2</sub>:**

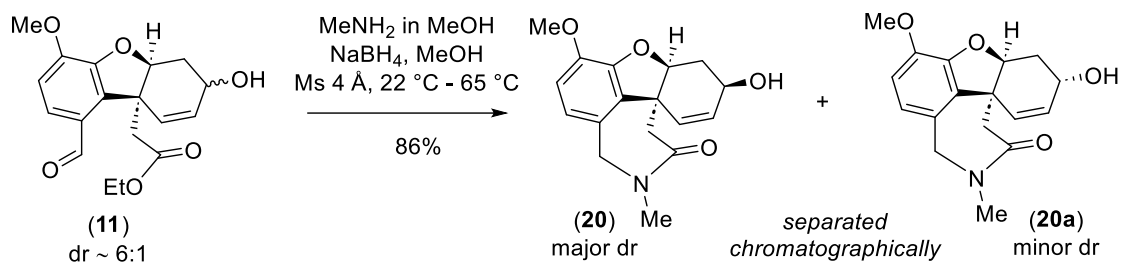

An oven dried round bottom flask was charged with ester-aldehyde compound (–)-**11** (200 mg, 0.601 mmol, 1.0 equiv.), and MeNH<sub>2</sub> in MeOH (25%) (3 mL, 6.01 mmol, 10.0 equiv.), 4 Å MS in anhydrous MeOH under inert atmosphere. Next, the reaction mixture allowed to stir at room temperature for 12 h, for complete formation of imine. Then, NaBH<sub>4</sub> (169 mg, 1.202 mmol, 2.0 equiv.) was added to the reaction mixture at 0 °C, followed by addition of catalytic amount of TFA (20 µL). Then the reaction mixture stirred at 22 °C for 6 h, followed by heating at 60 °C, for 2 h in a pre-heated oil bath. After complete consumption of starting material (monitored by TLC analysis) the crude reaction mixture was filtered and evaporated to dryness. Then it was diluted with EtOAc (20 mL), and quenched with saturated NaHCO<sub>3</sub> solution (20 mL). The organic layer was extracted with EtOAc (20 mL X 2), dried over Na<sub>2</sub>SO<sub>4</sub> and concentrated in rotary evaporator. The crude product was purified by flash chromatography using 12% EtOAc/hexane as eluent to afford desired product in 6:1 dr [(–)-**20** as major diastereomer and (–)-**20a** as minor diastereomer].

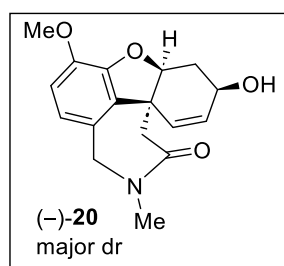

**(4*aS*,6*R*,8*aS*)-6-Hydroxy-3-methoxy-11-methyl-4*a*,5,11,12-tetrahydro-6*H*-**

**benzo[2,3]benzofuro[4,3-*cd*]azepin-10(9*H*)-one** [(–)-**20**]: Compound (–)-**20** was obtained as white foam (0.601 mmol scale of reaction, 135 mg of product, 74% yield);  $R_f = 0.04$  (70% EtOAc in *n*-hexane).

**<sup>1</sup>H NMR** (500 MHz, CDCl<sub>3</sub>): δ 6.73 (s, 1H), 6.05 (dd,  $J = 10.2, 5.1$  Hz, 1H), 5.52 (d,  $J = 10.1$  Hz, 1H), 4.77 (s, 1H), 4.49 (d,  $J = 16.1$  Hz, 1H), 4.36 (d,  $J = 16.1$  Hz, 1H), 4.18 (s, 1H), 3.87 (s, 3H), 3.04 (s, 3H), 2.81 (q,  $J = 13.8$  Hz, 2H), 2.77 – 2.65 (m, 1H), 2.19 – 2.01 (m, 1H).

$^{13}\text{C}$   $\{^1\text{H}\}$  NMR (126 MHz,  $\text{CDCl}_3$ ):  $\delta$  170.9, 146.6, 144.9, 132.1, 128.4, 125.2, 120.1, 112.0, 88.4, 61.6, 56.2, 52.0, 43.3, 41.6, 35.9, 29.3.

IR (film) $\nu_{\text{max}}$ : 2927, 1476, 748, 583  $\text{cm}^{-1}$ .

HRMS (ESI-TOF)  $m/z$ :  $[\text{M}+\text{H}]^+$  Calcd for  $[\text{C}_{17}\text{H}_{19}\text{NO}_4 + \text{H}]^+$  302.1392; Found 302.1396.

$[\alpha]_{\text{D}}^{25.0} = -78.25$  ( $c = 0.04$  g/ml,  $\text{CHCl}_3$ ).

SCXRD data of **20** is given in the CCDC **2333542**. This X-ray structure was obtained from a racemic reaction that was carried out initially. This confirms the structure of major diastereomer [diastereoselectivity at the -OH group].

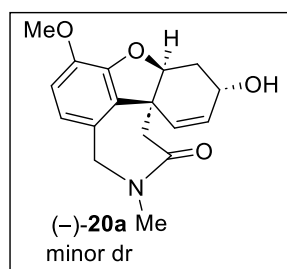

(4a*S*,6*S*,8a*S*)-6-Hydroxy-3-methoxy-11-methyl-4a,5,11,12-tetrahydro-6*H*-

benzo[2,3]benzofuro[4,3-*cd*]azepin-10(9*H*)-one [(-)-**20a**]: Compound (-)-**20a** (minor diastereomer) was obtained as white foam (0.601 mmol scale of reaction, 22 mg of product, 12% yield);  $R_f = 0.47$  (70% EtOAc in hexane).

$^1\text{H}$  NMR (500 MHz,  $\text{CDCl}_3$ ):  $\delta$  6.69 (q,  $J = 8.2$  Hz, 2H), 5.86 (d,  $J = 10.3$  Hz, 1H), 5.48 (d,  $J = 10.0$  Hz, 1H), 4.71 (dd,  $J = 17.3, 6.0$  Hz, 2H), 4.52 (d,  $J = 15.9$  Hz, 1H), 4.25 (d,  $J = 15.9$  Hz, 1H), 3.88 (s, 3H), 3.01 (s, 3H), 2.87 (s, 3H), 1.96 – 1.73 (m, 1H).

**Total Synthesis of galantamine [(-)-6a]:**

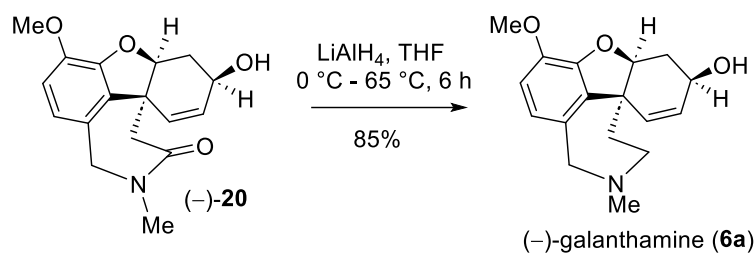

In an oven dried round bottom flask, lactam (-)-**20** (180 mg, 0.597 mmol, 1.0 equiv.) was dissolved in dry THF (10 mL) under nitrogen atmosphere. To this solution, LiAlH<sub>4</sub> (114 mg, 2.98 mmol, 5.0 equiv.) was added slowly at 0 °C. Then, the reaction mixture was placed in a pre-heated oil bath at 65 °C and the stirring was continued for 6 h. After complete consumption of starting material, the reaction mixture was cooled in an ice bath and diluted with EtOAc (10 mL), and quenched with 10% aq. NaOH solution. The organic layer was extracted with EtOAc (2 X 20 mL) and the combined organic layers were dried over anhydrous Na<sub>2</sub>SO<sub>4</sub>, filtered, and concentrated in a rotary evaporator under reduced pressure. The crude product was purified via column chromatography (neutral alumina) with 3% MeOH in CH<sub>2</sub>Cl<sub>2</sub>, to afford (-)-galantamine (**6a**) in 85% yield (146 mg).

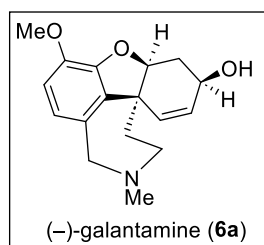

**(4a*S*,6*R*,8a*S*)-3-Methoxy-11-methyl-4a,5,9,10,11,12-hexahydro-6*H*-**

**benzo[2,3]benzofuro[4,3-*cd*]azepin-6-ol** [(-)-**6a**]: galantamine (-)-**6a** was obtained as yellow semi-solid (0.597 mmol scale of reaction, 146 mg of product, 85% yield); *R<sub>f</sub>* = 0.35 (10% MeOH in CH<sub>2</sub>Cl<sub>2</sub>).

**<sup>1</sup>H NMR** (500 MHz, CDCl<sub>3</sub>): δ 6.68 (d, *J* = 8.2 Hz, 1H), 6.65 (d, *J* = 8.2 Hz, 1H), 6.08 (d, *J* = 10.3 Hz, 1H), 6.02 (dd, *J* = 10.2, 4.9 Hz, 1H), 4.63 (d, *J* = 3.5 Hz, 1H), 4.19 – 4.08 (m, 2H), 3.85 (s, 3H), 3.72 (d, *J* = 14.9 Hz, 1H), 3.31 (t, *J* = 13.7 Hz, 1H), 3.09 (d, *J* = 14.3 Hz, 1H), 2.77 – 2.67 (m, 1H), 2.43 (s, 3H), 2.20 – 2.08 (m, 1H), 2.03 (ddd, *J* = 15.6, 4.9, 2.3 Hz, 1H), 1.73 – 1.56 (m, 1H).

$^{13}\text{C}$   $\{^1\text{H}\}$  NMR (126 MHz,  $\text{CDCl}_3$ ):  $\delta$  145.9, 144.2, 133.1, 128.7, 127.7, 126.8, 122.2, 111.3, 88.7, 62.1, 60.6, 55.9, 53.8, 48.2, 42.0, 33.8, 30.0.

IR (film) $\nu_{\text{max}}$ : 2942, 1740, 1682, 1576, 1286, 1205, 928, 732  $\text{cm}^{-1}$ .

HRMS (ESI-TOF)  $m/z$ :  $[\text{M}+\text{H}]^+$  Calcd for  $[\text{C}_{17}\text{H}_{21}\text{NO}_3 + \text{H}]^+$  288.1600; Found 288.1588.

$[\alpha]_{\text{D}}^{25.0} = -82.50$  ( $c = 0.025$  g/ml,  $\text{CHCl}_3$ )

### Comparison of $^1\text{H}$ -NMR Data of Galantamine:

| Zhou's Synthesis of (-)-Galantamine ( <b>6a</b> ) ( $^1\text{H}$ -NMR, 400 MHz, $\text{CDCl}_3$ ) <sup>1</sup>  |      |       |                         |
|-----------------------------------------------------------------------------------------------------------------|------|-------|-------------------------|
| $\delta$ (ppm)                                                                                                  | Int. | mult. | $J$ (Hz)                |
| 6.63                                                                                                            | 2H   | dd    | $J = 16.0, 8.0$ Hz      |
| 6.06                                                                                                            | 1H   | d     | $J = 10.4$ Hz           |
| 5.99                                                                                                            | 1H   | dd    | $J = 10.2, 4.8$ Hz      |
| 4.60                                                                                                            | 1H   | s     | -                       |
| 4.13                                                                                                            | 1H   | br    | -                       |
| 4.07                                                                                                            | 1H   | d     | $J = 15.2$ Hz           |
| 3.82                                                                                                            | 3H   | s     | -                       |
| 3.67                                                                                                            | 1H   | d     | $J = 15.2$ Hz           |
| 3.25                                                                                                            | 1H   | t     | $J = 13.6$ Hz           |
| 3.04                                                                                                            | 1H   | d     | $J = 14.4$ Hz           |
| 2.67                                                                                                            | 1H   | dd    | $J = 15.6, 1.6$ Hz      |
| 2.39                                                                                                            | 3H   | s     | -                       |
| 2.07                                                                                                            | 1H   | td    | $J = 13.4, 2.8$ Hz      |
| 2.00                                                                                                            | 1H   | ddd   | $J = 15.6, 4.8, 2.2$ Hz |
| 1.56                                                                                                            | 1H   | dd    | $J = 13.6, 2.2$ Hz      |
| Trost's Synthesis of (-)-Galantamine ( <b>6a</b> ) ( $^1\text{H}$ -NMR, 500 MHz, $\text{CDCl}_3$ ) <sup>2</sup> |      |       |                         |
| $\delta$ (ppm)                                                                                                  | Int. | mult. | $J$ (Hz)                |

|                                                                                                 |      |       |                         |
|-------------------------------------------------------------------------------------------------|------|-------|-------------------------|
| 6.64                                                                                            | 1H   | d     | $J = 8.3$ Hz            |
| 6.60                                                                                            | 1H   | d     | $J = 8.3$ Hz            |
| 6.04                                                                                            | 1H   | d     | $J = 10.2$ Hz           |
| 5.98                                                                                            | 1H   | ddd   | $J = 10.2, 5.1, 1.0$ Hz |
| 4.59                                                                                            | 1H   | s     | -                       |
| 4.12                                                                                            | 1H   | br s  | -                       |
| 4.07                                                                                            | 1H   | d     | $J = 15.1$ Hz           |
| 3.81                                                                                            | 3H   | s     | -                       |
| 3.66                                                                                            | 1H   | d     | $J = 15.1$ Hz           |
| 3.25                                                                                            | 1H   | t     | $J = 13.0$ Hz           |
| 3.03                                                                                            | 1H   | br d  | $J = 13.9$ Hz           |
| 2.67                                                                                            | 1H   | ddt   | $J = 15.9, 3.7, 1.2$ Hz |
| 2.38                                                                                            | 3H   | s     | -                       |
| 2.06                                                                                            | 1H   | td    | $J = 13.2, 2.0$ Hz      |
| 1.98                                                                                            | 1H   | ddd   | $J = 15.9, 4.1, 2.4$ Hz |
| 1.67                                                                                            | 1H   | br s  | -                       |
| 1.55                                                                                            | 1H   | ddd   | $J = 13.6, 3.6, 1.1$ Hz |
| This Synthesis of (-)-Galantamine ( <b>6a</b> ) ( $^1\text{H-NMR}$ , 500 MHz, $\text{CDCl}_3$ ) |      |       |                         |
| $\delta$ (ppm)                                                                                  | Int. | mult. | $J$ (Hz)                |
| 6.68                                                                                            | 1H   | d     | $J = 8.2$ Hz            |
| 6.65                                                                                            | 1H   | d     | $J = 8.2$ Hz            |
| 6.08                                                                                            | 1H   | d     | $J = 10.3$ Hz           |
| 6.02                                                                                            | 1H   | dd    | $J = 10.2, 4.9$ Hz      |
| 4.63                                                                                            | 1H   | d     | $J = 3.5$ Hz            |
| 4.19-4.08                                                                                       | 2H   | m     | -                       |
| 3.85                                                                                            | 3H   | s     | -                       |
| 3.72                                                                                            | 1H   | d     | $J = 14.9$ Hz           |
| 3.31                                                                                            | 1H   | t     | $J = 13.7$ Hz           |
| 3.09                                                                                            | 1H   | d     | $J = 14.3$ Hz           |
| 2.77 – 2.67                                                                                     | 1H   | m     | -                       |
| 2.43                                                                                            | 3H   | s     | -                       |

|             |    |     |                         |
|-------------|----|-----|-------------------------|
| 2.20 – 2.08 | 1H | m   | -                       |
| 2.03        | 1H | ddd | $J = 15.6, 4.9, 2.3$ Hz |
| 1.73 – 1.56 | 1H | m   | -                       |

**Comparison of  $^{13}\text{C}$ -NMR Data of Galantamine:**

| Zhou's Synthesis of (-)-Galantamine ( <b>6a</b> ) ( $^{13}\text{C}$ -NMR, 100 MHz, $\text{CDCl}_3$ ) <sup>1</sup> | Trost's Synthesis of (-)-Galantamine ( <b>6a</b> ) ( $^{13}\text{C}$ -NMR, 125 MHz, $\text{CDCl}_3$ ) <sup>2</sup> | This Synthesis of (-)-Galantamine ( <b>6a</b> ) ( $^{13}\text{C}$ -NMR, 126 MHz, $\text{CDCl}_3$ ) |
|-------------------------------------------------------------------------------------------------------------------|--------------------------------------------------------------------------------------------------------------------|----------------------------------------------------------------------------------------------------|
| 145.8                                                                                                             | 145.7                                                                                                              | 145.9                                                                                              |
| 144.1                                                                                                             | 144.1                                                                                                              | 144.2                                                                                              |
| 133.0                                                                                                             | 133.0                                                                                                              | 133.1                                                                                              |
| 129.4                                                                                                             | 129.3                                                                                                              | 128.7                                                                                              |
| 127.6                                                                                                             | 127.6                                                                                                              | 127.7                                                                                              |
| 126.9                                                                                                             | 126.8                                                                                                              | 126.8                                                                                              |
| 122.1                                                                                                             | 122.0                                                                                                              | 122.2                                                                                              |
| 111.1                                                                                                             | 111.1                                                                                                              | 111.3                                                                                              |
| 88.7                                                                                                              | 88.7                                                                                                               | 88.7                                                                                               |
| 62.1                                                                                                              | 62.1                                                                                                               | 62.1                                                                                               |
| 60.7                                                                                                              | 60.6                                                                                                               | 60.6                                                                                               |
| 55.9                                                                                                              | 55.9                                                                                                               | 55.9                                                                                               |
| 53.9                                                                                                              | 53.8                                                                                                               | 53.8                                                                                               |
| 48.2                                                                                                              | 48.2                                                                                                               | 48.2                                                                                               |
| 42.2                                                                                                              | 42.1                                                                                                               | 42.0                                                                                               |
| 33.8                                                                                                              | 33.8                                                                                                               | 33.8                                                                                               |
| 30.0                                                                                                              | 29.9                                                                                                               | 30.0                                                                                               |

**Hydrogenation of galantamine [(-)-**6a**]:**



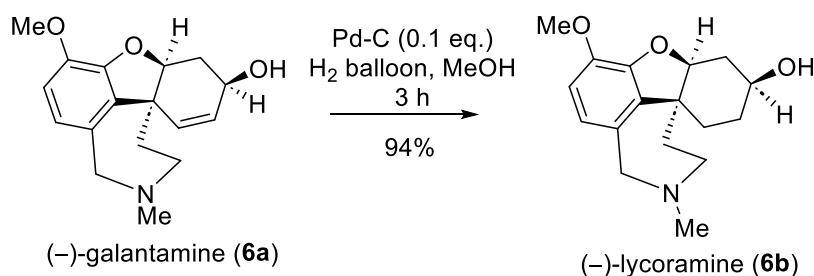

An oven-dried round bottom flask was charged with galantamine (–)-**6a** (50 mg, 0.173 mmol, 1.0 equiv.) in 3 mL of MeOH under nitrogen atmosphere. Next, the reaction vessel was degassed with N<sub>2</sub>-balloon for about 10 minutes. Then, Pd-C (5 mg, 10 vol% wt/wt) was added and H<sub>2</sub>-balloon was purged into the solution and stirring was continued for 3 h at 22 °C. Upon complete consumption of the starting material (judged by TLC analysis), H<sub>2</sub>-balloon was removed. Next, the reaction mixture was filtered and washed with MeOH, and evaporated the solvent under reduced pressure. The crude product was purified by flash chromatography (neutral alumina) with 3% MeOH in CH<sub>2</sub>Cl<sub>2</sub>, to afford (–)-lycoramine (**6b**) in 94% yield (47 mg).

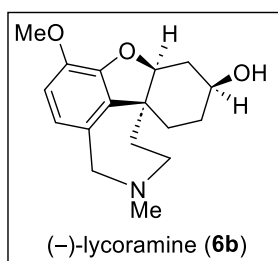

(4a*S*,6*S*,8a*R*)-3-Methoxy-11-methyl-4a,5,7,8,9,10,11,12-octahydro-6*H*-

**benzo[2,3]benzofuro[4,3-*cd*]azepin-6-ol** [(–)-**6b**]: Lycoramine (–)-**6b** was obtained as pale yellow semi-solid (0.173 mmol scale of reaction, 47 mg of product, 92% yield); *R<sub>f</sub>* = 0.33 (10% MeOH in CH<sub>2</sub>Cl<sub>2</sub>).

<sup>1</sup>H NMR (500 MHz, CDCl<sub>3</sub>): δ 6.73 (d, *J* = 8.1 Hz, 1H), 6.69 (d, *J* = 8.2 Hz, 1H), 4.43 (d, *J* = 3.4 Hz, 1H), 4.29 (d, *J* = 14.8 Hz, 1H), 4.13 (s, 1H), 3.89 (s, 3H), 3.49 (t, *J* = 13.5 Hz, 1H), 3.26 (d, *J* = 14.3 Hz, 1H), 3.13 (q, *J* = 7.5 Hz, 1H), 2.57 (d, *J* = 13.5 Hz, 1H), 2.53 (s, 3H), 2.06 (t, *J* = 14.5 Hz, 1H), 1.94 (d, *J* = 16.7 Hz, 1H), 1.87 (d, *J* = 12.8 Hz, 1H), 1.75 (dd, *J* = 13.8, 8.5 Hz, 2H), 1.48 – 1.41 (m, 1H), 1.33 – 1.26 (m, 1H).

$^{13}\text{C}$   $\{^1\text{H}\}$  NMR (126 MHz,  $\text{CDCl}_3$ ):  $\delta$  146.4, 145.2, 135.7, 130.6, 123.0, 111.4, 89.7, 65.1, 58.6, 56.0, 55.4, 45.9, 40.0, 31.5, 29.9, 27.6, 23.9.

HRMS (ESI-TOF)  $m/z$ :  $[\text{M}+\text{H}]^+$  Calcd for  $[\text{C}_{17}\text{H}_{23}\text{NO}_3 + \text{H}]^+$  290.1751; Found 290.1750.

IR (film) $\nu_{\text{max}}$ : 2942, 1740, 1682, 1576, 1286, 1205, 928, 732  $\text{cm}^{-1}$ .

$[\alpha]_{\text{D}}^{25.0} = -91.76$  ( $c = 0.025$  g/ml,  $\text{CHCl}_3$ )

### Comparison of $^1\text{H}$ -NMR Data of Lycoramine:

| Zhou's report (-)-lycoramine ( <b>6b</b> ) ( $^1\text{H}$ -NMR, 400 MHz, $\text{CDCl}_3$ ) <sup>1</sup>     |      |       |                    |
|-------------------------------------------------------------------------------------------------------------|------|-------|--------------------|
| $\delta$ (ppm)                                                                                              | Int. | mult. | $J$ (Hz)           |
| 6.59                                                                                                        | 2H   | dd    | $J = 21.6, 8.0$ Hz |
| 4.34                                                                                                        | 1H   | br    | -                  |
| 4.08 – 4.02                                                                                                 | 1H   | m     | -                  |
| 3.98                                                                                                        | 1H   | d     | $J = 15.2$ Hz      |
| 3.82                                                                                                        | 3H   | s     | -                  |
| 3.65 – 3.59                                                                                                 | 2H   | m     | -                  |
| 3.18                                                                                                        | 1H   | t     | $J = 12.8$ Hz      |
| 3.03 – 3.00                                                                                                 | 1H   | m     | -                  |
| 2.48 – 2.43                                                                                                 | 1H   | m     | -                  |
| 2.33                                                                                                        | 3H   | s     | -                  |
| 2.01 – 1.58                                                                                                 | 8H   | m     | -                  |
| 1.58 – 1.48                                                                                                 | 1H   | m     | -                  |
| Xu's report ( $\pm$ )-lycoramine ( <b>6b</b> ) ( $^1\text{H}$ -NMR, 400 MHz, $\text{CDCl}_3$ ) <sup>3</sup> |      |       |                    |
| $\delta$ (ppm)                                                                                              | Int. | mult. | $J$ (Hz)           |
| 6.65                                                                                                        | 1H   | d     | $J = 8.2$ Hz       |
| 6.60                                                                                                        | 1H   | d     | $J = 8.2$ Hz       |
| 4.37                                                                                                        | 1H   | t     | $J = 3.2$ Hz       |

|                                                                                                |      |       |                                       |
|------------------------------------------------------------------------------------------------|------|-------|---------------------------------------|
| 4.08                                                                                           | 1H   | dd    | $J = 4.8, 2.4 \text{ Hz}$             |
| 4.03                                                                                           | 1H   | d     | $J = 15.0 \text{ Hz}$                 |
| 3.85                                                                                           | 3H   | s     | -                                     |
| 3.64                                                                                           | 1H   | dd    | $J = 14.8, 1.2 \text{ Hz}$            |
| 3.23                                                                                           | 1H   | ddd   | $J = 14.5, 12.6, 1.9 \text{ Hz}$      |
| 3.13 – 3.01                                                                                    | 1H   | m     | -                                     |
| 2.50                                                                                           | 1H   | dd    | $J = 16.0, 2.2 \text{ Hz}$            |
| 2.38                                                                                           | 3H   | s     | -                                     |
| 2.02 – 1.94                                                                                    | 1H   | m     | -                                     |
| 1.94 – 1.84                                                                                    | 2H   | m     | -                                     |
| 1.83 – 1.75                                                                                    | 2H   | m     | -                                     |
| 1.75 – 1.62                                                                                    | 2H   | m     | -                                     |
| 1.62 – 1.52                                                                                    | 1H   | m     | -                                     |
| This Synthesis of (-)-Lycoramine ( <b>6b</b> ) ( $^1\text{H-NMR}$ , 400 MHz, $\text{CDCl}_3$ ) |      |       |                                       |
| $\delta$ (ppm)                                                                                 | Int. | mult. | $J$ (Hz)                              |
| 6.73                                                                                           | 1H   | d     | $J = 8.1 \text{ Hz}$                  |
| 6.69                                                                                           | 1H   | d     | $J = 8.2 \text{ Hz}$                  |
| 4.43                                                                                           | 1H   | d     | $J = 3.4 \text{ Hz}$                  |
| 4.29                                                                                           | 1H   | d     | $J = 14.8 \text{ Hz}$                 |
| 4.13                                                                                           | 1H   | s     | -                                     |
| 3.89                                                                                           | 3H   | s     | -                                     |
| 3.49                                                                                           | 1H   | t     | $J = 13.5 \text{ Hz}$                 |
| 3.26                                                                                           | 1H   | d     | $J = 14.3 \text{ Hz}$                 |
| 3.13                                                                                           | 1H   | q     | $J = 7.5 \text{ Hz}$                  |
| 2.57                                                                                           | 1H   | d     | $J = 13.5 \text{ Hz}$                 |
| 2.53                                                                                           | 3H   | s     | -                                     |
| 2.06                                                                                           | 1H   | t     | $J = 14.5 \text{ Hz}$                 |
| 1.94                                                                                           | 1H   | d     | $J = 16.7 \text{ Hz}$                 |
| 1.87                                                                                           | 1H   | d     | $J = 12.8 \text{ Hz}$                 |
| 1.75                                                                                           | 2H   | dd    | $J = 13.8 \text{ Hz}, 8.5 \text{ Hz}$ |
| 1.48-1.41                                                                                      | 1H   | m     | -                                     |

**Comparison of  $^{13}\text{C}$ -NMR Data Comparison of  $^1\text{H}$ -NMR Data of Lycoramine:**

| Zhou's Synthesis of (-)-<br>Lycoramine ( <b>6b</b> ) ( $^{13}\text{C}$ -<br>NMR, 100 MHz, $\text{CDCl}_3$ ) <sup>1</sup> | Xu's Synthesis of ( $\pm$ )-<br>Lycoramine ( <b>6b</b> ) ( $^{13}\text{C}$ -<br>NMR, 100 MHz,<br>$\text{CDCl}_3$ ) <sup>3</sup> | This Synthesis of (-)-<br>Lycoramine ( <b>6b</b> ) ( $^{13}\text{C}$ -<br>NMR, 126 MHz, $\text{CDCl}_3$ ) |
|--------------------------------------------------------------------------------------------------------------------------|---------------------------------------------------------------------------------------------------------------------------------|-----------------------------------------------------------------------------------------------------------|
| 146.0                                                                                                                    | 146.0                                                                                                                           | 146.4                                                                                                     |
| 144.1                                                                                                                    | 144.3                                                                                                                           | 145.2                                                                                                     |
| 136.3                                                                                                                    | 136.4                                                                                                                           | 135.7                                                                                                     |
| 128.6                                                                                                                    |                                                                                                                                 | 130.6                                                                                                     |
| 121.9                                                                                                                    | 122.1                                                                                                                           | 123.0                                                                                                     |
| 110.7                                                                                                                    | 110.7                                                                                                                           | 111.4                                                                                                     |
| 89.9                                                                                                                     | 90.1                                                                                                                            | 89.7                                                                                                      |
| 65.4                                                                                                                     | 65.5                                                                                                                            | 65.1                                                                                                      |
| 60.4                                                                                                                     | 60.4                                                                                                                            | 58.6                                                                                                      |
| 55.9                                                                                                                     | 56.0                                                                                                                            | 56.0                                                                                                      |
| 54.0                                                                                                                     | 54.1                                                                                                                            | 53.4                                                                                                      |
| 46.7                                                                                                                     | 46.8                                                                                                                            | 45.9                                                                                                      |
| 41.8                                                                                                                     | 41.7                                                                                                                            | 40.0                                                                                                      |
| 31.6                                                                                                                     | 31.6                                                                                                                            | 31.5                                                                                                      |
| 31.2                                                                                                                     | 31.1                                                                                                                            | 29.9                                                                                                      |
| 27.6                                                                                                                     | 27.7                                                                                                                            | 27.6                                                                                                      |
| 23.7                                                                                                                     | 23.7                                                                                                                            | 23.7                                                                                                      |

**Reductive amination and lactamization of ester aldehyde (11) with benzylic amine (12):**

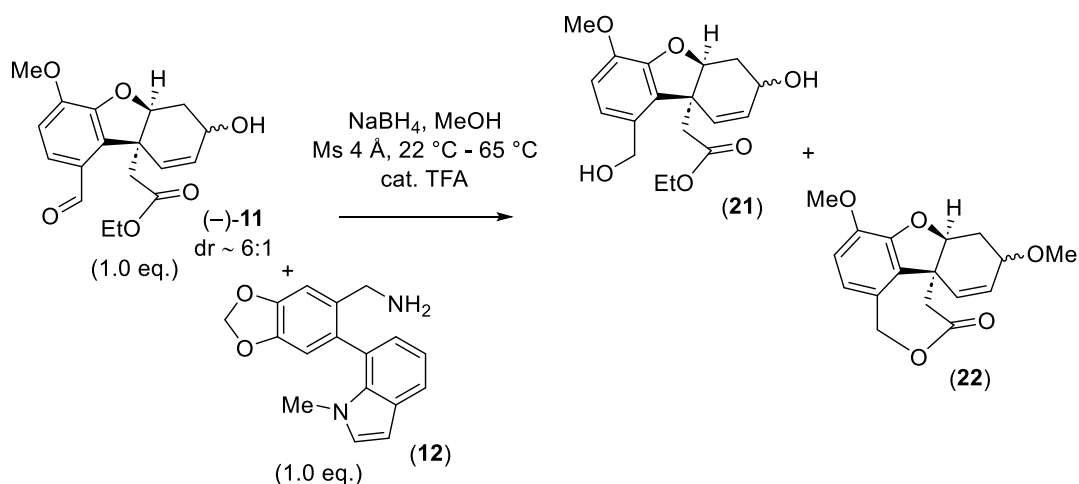

An oven dried round bottom flask was charged with ester-aldehyde compound  $(-)\text{-11}$  (200 mg, 0.601 mmol, 1.0 equiv.), and benzyl amine  $(12)$  (168 mg, 0.601 mmol, 1.0 equiv.), 4 Å MS in anhydrous MeOH under inert atmosphere. Then the reaction mixture was allowed to stir at room temperature for 12 h. Next,  $\text{NaBH}_4$  (46 mg, 1.2 mmol, 2.0 equiv.) was added to the reaction mixture at 0 °C, followed by addition of catalytic amount of TFA (20  $\mu\text{L}$ ). Then the reaction mixture stirred at 22 °C for 6 h, followed by heating at 60 °C, for 2 h in a pre-heated oil bath. After complete consumption of starting material (monitored by TLC) the crude reaction mixture was filtered and evaporated to dryness. Then it was diluted with EtOAc (20 mL), and quenched with saturated  $\text{NaHCO}_3$  solution. The organic layer was extracted with EtOAc (20 mL X 2) dried with  $\text{Na}_2\text{SO}_4$  and concentrated in rotary evaporator. The crude product was purified by flash chromatography using 12% EtOAc/hexane as eluent to afford 26% yield of  $(-)\text{-21}$  along with 42% yield of  $(-)\text{-22}$ .

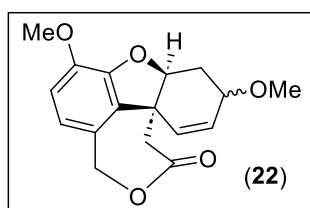

**(4a*S*,8a*S*)-3,6-dimethoxy-4a,5-dihydro-6*H*,12*H*-benzo[*b*]oxepino[5,4,3-*cd*]benzofuran-10(9*H*)-one** [ $(-)\text{-22}$ ]: Compound  $(-)\text{-22}$  was obtained as colorless gel (0.601 mmol scale of reaction, 76 mg of product, 42% yield);  $R_f = 0.55$  (40% EtOAc in hexane).

$^1\text{H NMR}$  (500 MHz,  $\text{CDCl}_3$ ):  $\delta$  6.88 (d,  $J = 8.3$  Hz, 1H), 6.78 (d,  $J = 8.3$  Hz, 1H), 5.99 (s, 2H), 5.11 (dd,  $J = 6.1, 3.4$  Hz, 1H), 4.76 (d,  $J = 12.1$  Hz, 1H), 4.67 (d,  $J = 12.1$  Hz, 1H), 4.24 (q,  $J$

= 4.3 Hz, 1H), 3.87 (s, 3H), 3.63 (s, 3H), 3.05 (d,  $J = 14.8$  Hz, 1H), 2.80 (d,  $J = 14.8$  Hz, 1H), 2.39 (ddd,  $J = 14.6, 6.2, 4.5$  Hz, 1H), 2.20 (ddd,  $J = 14.6, 5.0, 3.5$  Hz, 1H).

$^{13}\text{C}$  { $^1\text{H}$ } NMR (126 MHz,  $\text{CDCl}_3$ ):  $\delta$  171.0, 146.6, 145.2, 130.2, 129.9, 129.2, 128.9, 123.5, 111.7, 84.2, 62.7, 62.6, 55.9, 51.8, 49.0, 40.8, 31.8.

IR (film) $\nu_{\text{max}}$ : 2927, 1476, 748, 583 $\text{cm}^{-1}$ .

HRMS (ESI-TOF)  $m/z$ :  $[\text{M}+\text{H}]^+$  Calcd for  $[\text{C}_{17}\text{H}_{18}\text{O}_5 + \text{H}]^+$  303.1232; Found 303.1227.

### TBS-protection of compound [(-)-11]:

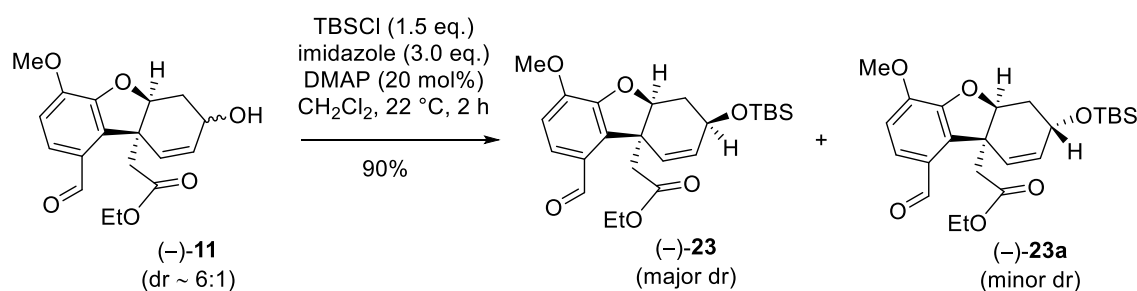

In an oven-dried round bottom flask, allylic alcohol (-)-11 (500 mg, dr ~6:1, 1.5 mmol, 1.0 equiv.), was taken in  $\text{CH}_2\text{Cl}_2$  (10 mL). The reaction mixture placed in an ice bath at 0 °C. To this solution was added imidazole (306 mg, 4.5 mmol, 3.0 equiv.), DMAP (37 mg, 0.3 mmol, 0.2 equiv.) and TBSCl (340 mg, 2.25 mmol, 1.5 equiv.) successively and the reaction mixtures allowed to stir at room temperature for 2 h. After complete consumption of starting material (monitored by TLC analysis) the reaction mixture was diluted with  $\text{CH}_2\text{Cl}_2$  (10 mL) and quenched with  $\text{H}_2\text{O}$  (15 mL). The resulting mixture was extracted with  $\text{CH}_2\text{Cl}_2$  (2 X 20 mL) and the combined organic layers were dried over anhydrous  $\text{Na}_2\text{SO}_4$ , filtered, and concentrated in a rotary evaporator under reduced pressure. The crude product was purified by flash chromatography using 8% EtOAc in *n*-hexane to afford desired product (-)-23 (major diastereomer) in 77% yield (502 mg), and the minor diastereomer 23a in 13% yield.

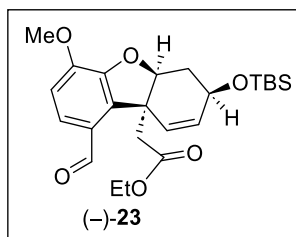

**Ethyl 2-((5a*S*,7*R*,9a*S*)-7-((tert-butyldimethylsilyl)oxy)-1-formyl-4-methoxy-6,7-dihydrodibenzo[*b,d*]furan-9a(5a*H*)-yl)acetate [(-)-**23**]:** Compound (-)-**23** was obtained as colourless liquid (1.5 mmol scale of reaction, 502 mg of product, 77% yield of major diastereomer);  $R_f = 0.45$  (20% EtOAc in hexane).

**$^1\text{H NMR}$**  (500 MHz,  $\text{CDCl}_3$ ):  $\delta$  9.87 (s, 1H), 7.38 (d,  $J = 8.4$  Hz, 1H), 6.91 (d,  $J = 8.4$  Hz, 1H), 6.53 (dd,  $J = 10.3, 1.9$  Hz, 1H), 5.84 (ddd,  $J = 10.3, 2.3, 1.2$  Hz, 1H), 5.37 (dd,  $J = 10.5, 5.3$  Hz, 1H), 4.37 (ddt,  $J = 9.1, 4.6, 2.1$  Hz, 1H), 4.07 (q,  $J = 7.1$  Hz, 2H), 3.97 (s, 3H), 3.00 (d,  $J = 14.8$  Hz, 1H), 2.80 (d,  $J = 14.8$  Hz, 1H), 2.34 (m, 1H), 1.91 – 1.74 (m, 1H), 1.19 (t,  $J = 7.1$  Hz, 3H), 0.86 (s, 9H), 0.06 (d,  $J = 9.1$  Hz, 6H).

**$^{13}\text{C} \{^1\text{H}\}$  NMR** (126 MHz,  $\text{CDCl}_3$ ):  $\delta$  191.0, 170.6, 150.4, 147.9, 134.2, 131.7, 130.6, 127.1, 126.8, 110.5, 84.7, 64.7, 60.4, 56.1, 49.9, 42.0, 36.8, 29.7, 25.7, 18.0, 14.1, -4.7, -4.8.

**IR** (film) $\nu_{\text{max}}$ : 2902, 1738, 1680, 1589, 1452, 1321  $\text{cm}^{-1}$ .

**HRMS** (ESI-TOF)  $m/z$ :  $[\text{M}+\text{Na}]^+$  Calcd for  $[\text{C}_{24}\text{H}_{34}\text{O}_6\text{Si} + \text{Na}]^+$  469.2022; Found 469.2025.

$[\alpha]_{\text{D}}^{24.0} = -65.11$  ( $c = 0.025$  g/mL, EtOH)

#### Synthesis of di-aldehyde compound [(-)-**24**]:

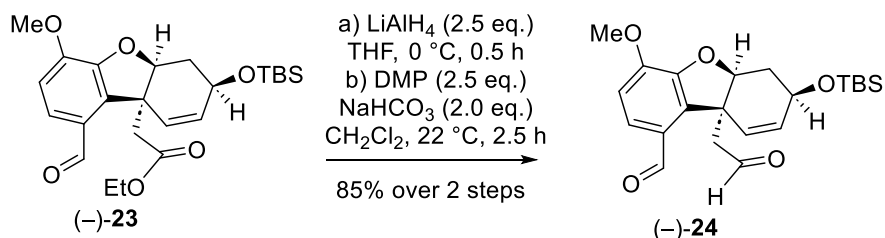

In an oven dried round bottom flask, compound (-)-**23** (480 mg, 1.074 mmol, 1.0 equiv.) was dissolved in dry THF (10 mL) under nitrogen atmosphere. To this solution was added  $\text{LiAlH}_4$

(82 mg, 2.14 mmol, 2.0 equiv.) slowly at 0 °C for 3 minutes. After stirring 30 minutes at 0 °C the reaction mixture was diluted with EtOAc (10 mL), and quenched with 10% aq. NaOH solution. The organic layer was extracted with EtOAc (2 X 20 mL), dried over Na<sub>2</sub>SO<sub>4</sub> and the combined organic layers were dried over anhydrous Na<sub>2</sub>SO<sub>4</sub>, filtered, and concentrated in a rotary evaporator under reduced pressure. The crude product was directly charged for next steps.

The crude product was dissolved in CH<sub>2</sub>Cl<sub>2</sub> 10 mL in a round bottom flask and DMP [Dess-Martin Periodinane] (456 mg, 1.074 mmol, 1.0 equiv.) and NaHCO<sub>3</sub> (90 mg, 1.074 mmol, 1.0 equiv.) was added to the reaction mixture and stirring continued for 2.5 h at room temperature. After complete consumption of starting material, the reaction mixture diluted with CH<sub>2</sub>Cl<sub>2</sub> (10 mL) and quenched with saturated Na<sub>2</sub>S<sub>2</sub>O<sub>3</sub> solution. The organic layer was extracted with CH<sub>2</sub>Cl<sub>2</sub> (2 X 10 mL) and concentrated in a rotary evaporator under reduced pressure. The crude product was purified by flash chromatography using 12% EtOAc/hexane as eluent to afford of the pure desired product (–)-**24** (367 mg, 90% yield).

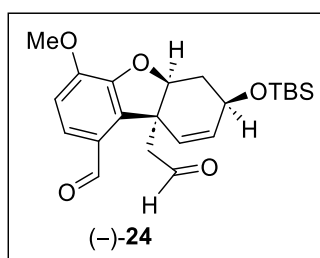

(5*aS*,7*R*,9*aS*)-7-((*tert*-butyldimethylsilyl)oxy)-4-Methoxy-9*a*-(2-oxoethyl)-5*a*,6,7,9*a*-tetrahydrodibenzo[*b,d*]furan-1-carbaldehyde [(–)-**24**]: Compound (–)-**32** was obtained as colourless liquid (1.074 mmol scale of reaction, 367 mg of product, 85% yield);  $R_f$  = 0.50 (20% EtOAc in *n*-hexane).

<sup>1</sup>H NMR (500 MHz, CDCl<sub>3</sub>): δ 9.84 (s, 1H), 9.62 (t,  $J$  = 2.3 Hz, 1H), 7.39 (d,  $J$  = 8.3 Hz, 1H), 6.93 (d,  $J$  = 8.4 Hz, 1H), 6.55 (dd,  $J$  = 10.3, 1.9 Hz, 1H), 5.85 (ddd,  $J$  = 10.4, 2.3, 1.2 Hz, 1H), 5.01 (dd,  $J$  = 10.3, 5.2 Hz, 1H), 4.37 (ddt,  $J$  = 9.0, 4.6, 2.1 Hz, 1H), 3.97 (s, 3H), 3.16 (dd,  $J$  = 16.0, 2.2 Hz, 1H), 2.91 (dd,  $J$  = 16.0, 2.4 Hz, 1H), 2.38 – 2.29 (m, 1H), 1.86 – 1.76 (m, 1H), 0.85 (s, 9H), 0.06 (d,  $J$  = 8.9 Hz, 6H).



$^{13}\text{C}$   $\{^1\text{H}\}$  NMR (126 MHz,  $\text{CDCl}_3$ ):  $\delta$  200.9, 191.3, 150.5, 147.9, 134.1, 131.4, 131.1, 126.8, 126.6, 110.7, 85.4, 64.6, 56.1, 50.8, 49.1, 36.4, 25.7, 18.0, -4.7, -4.7.

IR (film) $\nu_{\text{max}}$ : 2904, 1682, 1670, 1452, 1321  $\text{cm}^{-1}$ .

HRMS (ESI-TOF)  $m/z$ :  $[\text{M}+\text{Na}]^+$  Calcd for  $[\text{C}_{22}\text{H}_{30}\text{O}_5\text{Si} + \text{Na}]^+$  425.1760; Found 425.1781.

$[\alpha]_{\text{D}}^{25.0} = -71.20$  ( $c = 0.025$  g/mL,  $\text{CHCl}_3$ )

**Double reductive amination of dialdehyde (–)-**24** with benzylic amine (±)-**12** formation of 7-member azepine core:**

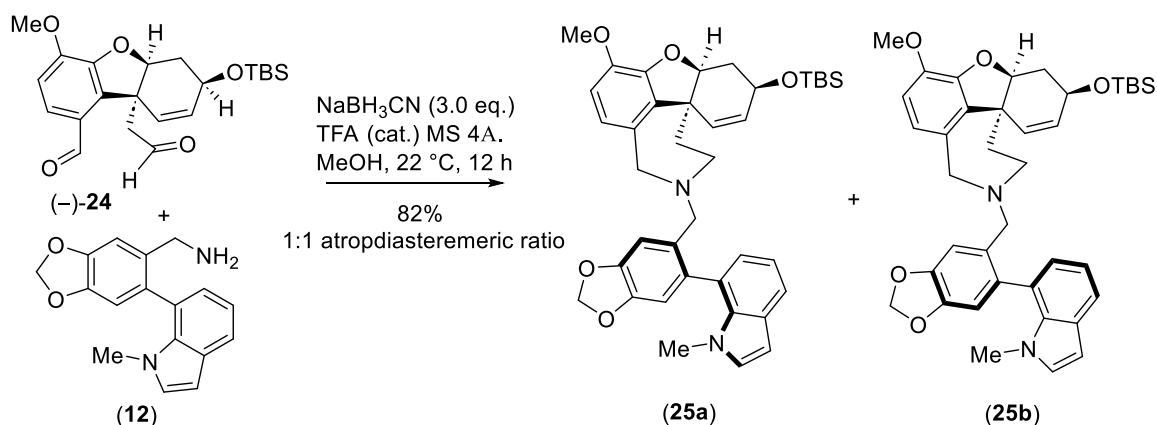

An oven dried round bottom flask was charged with di-aldehyde compound (–)-**24** (359 mg, 0.891 mmol, 1.0 equiv.), and benzyl amine (±)-**12** (250 mg, 0.891 mmol, 1.0 equiv.), 4 Å MS in anhydrous MeOH under inert atmosphere. Then  $\text{NaBH}_3\text{CN}$  (169 mg, 2.673 mmol, 3.0 equiv.) was added to the reaction mixture at 0 °C, followed by addition of catalytic amount of TFA (20  $\mu\text{L}$ ). Then the reaction mixture stirred at 22 °C for 12 h. After complete consumption of starting material (monitored by TLC analysis) the crude reaction mixture was filtered and evaporated to dryness. Then it was diluted with EtOAc (20 mL), and quenched with saturated  $\text{NaHCO}_3$  solution (15 mL). The organic layer was extracted with EtOAc (20 mL X 2), dried over  $\text{Na}_2\text{SO}_4$  and concentrated in rotary evaporator. The crude product was purified by flash chromatography using 12% EtOAc/hexane as eluent to afford of the pure desired product (–)-**25** in 82% yield (475 mg) as a 1:1 diastereomeric mixtures.

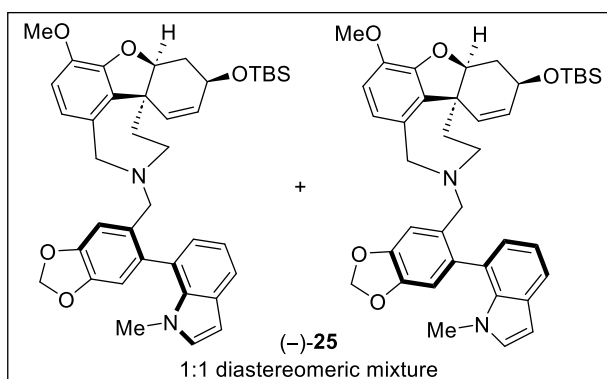

**(4a*S*,6*R*,8a*S*)-6-((*tert*-butyldimethylsilyl)oxy)-3-methoxy-11-((6-(1-methyl-1*H*-indol-7-yl)benzo[*d*][1,3]dioxol-5-yl)methyl)-4a,5,9,10,11,12-hexahydro-6*H***

**benzo[2,3]benzofuro[4,3-*cd*]azepine [(-)-**25**]:** Compound (-)-**25** was obtained as white foam as 1:1 dr (0.891 mmol scale of reaction, 475 mg of product, 82% yield);  $R_f = 0.55$  (30% EtOAc in *n*-hexane).

**$^1\text{H}$  NMR** [1:1 dr of **25a** and **25b**] (500 MHz,  $\text{CDCl}_3$ ):  $\delta$  7.59 (t,  $J = 8.4$  Hz, 2H), 7.05 (td,  $J = 17.4, 16.7, 7.5$  Hz, 4H), 6.97 – 6.87 (m, 3H), 6.83 (s, 2H), 6.79 (d,  $J = 7.4$  Hz, 1H), 6.63 (d,  $J = 8.1$  Hz, 1H), 6.55 (d,  $J = 8.1$  Hz, 1H), 6.52 – 6.47 (m, 2H), 6.42 (d,  $J = 8.1$  Hz, 1H), 6.33 (d,  $J = 8.3$  Hz, 1H), 6.04 (d,  $J = 8.1$  Hz, 4H), 5.97 (dd,  $J = 10.4, 5.8$  Hz, 2H), 5.77 (dt,  $J = 10.3, 5.0$  Hz, 2H), 4.40 (d,  $J = 14.5$  Hz, 2H), 4.22 (s, 2H), 3.96 – 3.87 (m, 2H), 3.85 (s, 3H), 3.82 (s, 3H), 3.50 (dd,  $J = 33.3, 14.7$  Hz, 2H), 3.33 (m, 2H), 3.31 (s, 3H), 3.28 – 3.22 (m, 2H), 3.20 (s, 3H), 2.96 (dd,  $J = 36.1, 13.7$  Hz, 2H), 2.65 (d,  $J = 14.2$  Hz, 1H), 2.51 (d,  $J = 14.0$  Hz, 1H), 2.37 (d,  $J = 15.1$  Hz, 2H), 2.00 (t,  $J = 15.6$  Hz, 2H), 1.71-1.62 (m, 4H), 1.33-1.25 (m, 2H), 0.88 (s, 18H), 0.08 (s, 6H), 0.03 (s, 6H).

**$^{13}\text{C}$  { $^1\text{H}$ } NMR** [1:1 dr of **25a** and **25b**] (126 MHz,  $\text{CDCl}_3$ ):  $\delta$  147.2, 147.1, 147.0, 145.6, 143.9, 134.6, 134.5, 133.4, 133.3, 132.8, 130.4, 130.4, 129.4, 128.9, 127.6, 124.7, 123.9, 123.7, 120.9, 120.6, 120.1, 120.0, 118.8, 118.8, 111.9, 111.7, 110.9, 109.1, 109.0, 101.1, 101.1, 100.9, 100.8, 88.7, 86.9, 86.9, 63.7, 62.1, 62.0, 58.2, 57.3, 56.4, 56.3, 54.3, 52.2, 48.2, 48.1, 35.9, 35.6, 32.8, 32.7, 25.8, 18.1, -4.5, -4.6.

**IR** (film) $\nu_{\text{max}}$ : 2927, 1476, 748, 583 $\text{cm}^{-1}$ .

**HRMS** (ESI-TOF)  $m/z$ :  $[\text{M}+\text{H}]^+$  Calcd for  $[\text{C}_{39}\text{H}_{46}\text{N}_2\text{O}_5\text{Si} + \text{H}]^+$  651.3254; Found 651.3267.

$[\alpha]_D^{25.0} = -38.25$  ( $c = 0.04$  g/ml,  $\text{CHCl}_3$ )

### Synthesis of dehydro narcipavline [(-)-26]:

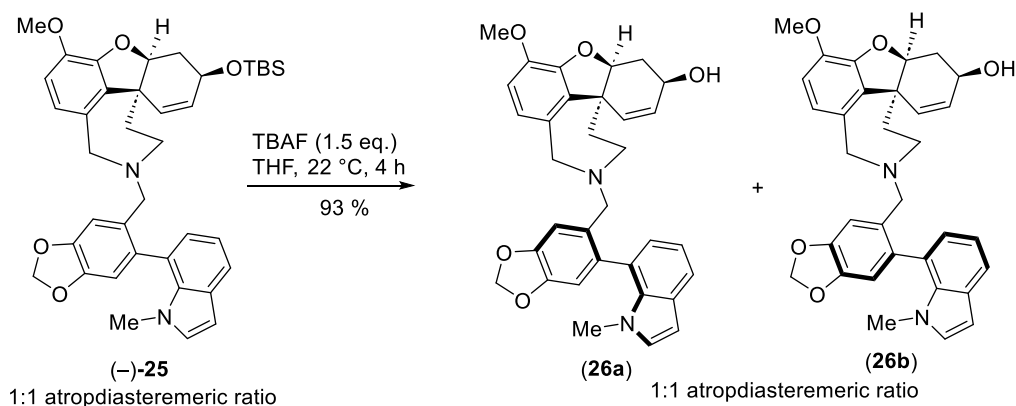

In a round bottom flask compound, (-)-**25** (dr ~ 1:1) (400 mg, 0.614 mmol, 1.0 equiv.) was dissolved in 4 mL of dry THF under nitrogen atmosphere. The reaction mixture placed in an ice bath. Then, 1(M) solution TBAF in THF (920  $\mu\text{L}$ , 0.921 mmol, 1.5 equiv.) was added dropwise at 0 °C. Further the reaction mixture allowed to stir at 22 °C for 4 h. After complete conversion of the starting material (monitored by TLC analysis), reaction mixture diluted with 10 mL EtOAc and quenched with  $\text{H}_2\text{O}$  15 mL. The organic layer extracted with EtOAc (20 mL X 2) and washed with brine solution and concentrated in rotary evaporator. The crude product was purified by flash chromatography using 30% EtOAc/hexane as eluent to afford desired product (-)-**26** (306 mg, 83%) as a 1:1 diastereomeric mixtures which shows single spot in TLC and inseparable *via* column chromatography. [N. B.: Racemic ( $\pm$ )-**26** was crystallized in *i*-PrOH by keeping it in room temperature for 21 days.]

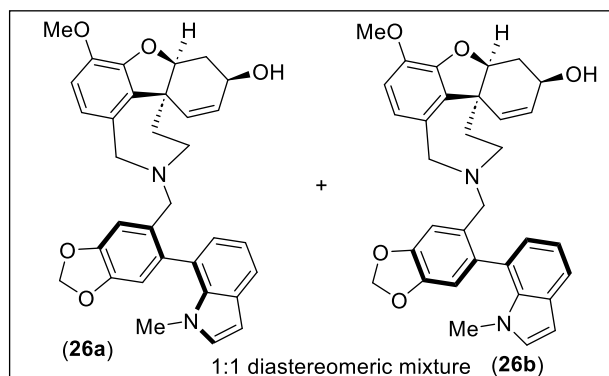

(4a*S*,6*R*,8a*S*)-3-methoxy-11-((6-(1-methyl-1*H*-indol-7-yl)benzo[*d*][1,3]dioxol-5-yl)methyl)-4a,5,9,10,11,12-hexahydro-6*H*-benzo[2,3]benzofuro[4,3-*cd*]azepin-6-ol [(-)-**26**]: Compound (-)-**26** [dr ~ 1:1] was obtained as yellow semi-solid. (0.6 mmol scale of reaction, 300 mg of product, 90% yield);  $R_f = 0.35$  (60% EtOAc in *n*-hexane).

**<sup>1</sup>H NMR** [1:1 dr of **26a** and **26b**] (500 MHz, CDCl<sub>3</sub>): δ 7.59 (td,  $J = 8.2, 1.2$  Hz, 2H), 7.08 (d,  $J = 7.3$  Hz, 1H), 7.05 (t,  $J = 4.5$  Hz, 2H), 7.00 (t,  $J = 7.5$  Hz, 1H), 6.95 (d,  $J = 3.1$  Hz, 1H), 6.92 (dd,  $J = 7.2, 1.2$  Hz, 1H), 6.89 (d,  $J = 3.1$  Hz, 1H), 6.83 (d,  $J = 1.7$  Hz, 2H), 6.78 (d,  $J = 6.0$  Hz, 1H), 6.66 (d,  $J = 8.1$  Hz, 1H), 6.58 (d,  $J = 8.1$  Hz, 1H), 6.50 (dd,  $J = 8.8, 3.2$  Hz, 3H), 6.42 (d,  $J = 8.1$  Hz, 1H), 6.04 (dd,  $J = 3.0, 1.4$  Hz, 2H), 6.03 (d,  $J = 1.5$  Hz, 2H), 6.00 – 5.91 (m, 4H), 4.42 (d,  $J = 15.4$  Hz, 2H), 4.10 (q,  $J = 5.1$  Hz, 2H), 3.89 (d,  $J = 5.6$  Hz, 1H), 3.86 (s, 3H), 3.83 (d,  $J = 15.7$  Hz, 1H), 3.83 (s, 3H), 3.59 (d,  $J = 15.3$  Hz, 1H), 3.53 (d,  $J = 15.4$  Hz, 1H), 3.34 (dd,  $J = 13.9, 5.8$  Hz, 2H), 3.30 (s,  $J = 10.3$  Hz, 3H), 3.29 – 3.23 (m, 2H), 3.20 (s, 3H), 3.06 – 2.91 (m, 2H), 2.74 – 2.56 (m, 2H), 1.96-1.88 (m, 2H), 1.73-1.64 (m, 2H), 1.62-1.55 (m, 2H), 1.38 – 1.31 (m, 2H).

**<sup>13</sup>C {<sup>1</sup>H} NMR** [1:1 dr of **26a** and **26b**] (126 MHz, CDCl<sub>3</sub>): δ 147.2, 145.9, 145.8, 145.7, 144.0, 134.6, 134.5, 133.3, 133.3, 130.5, 130.4, 129.4, 127.4, 127.1, 124.6, 123.9, 123.7, 122.0, 121.7, 120.1, 120.1, 118.8, 111.2, 111.1, 111.0, 111.0, 109.0, 109.0, 101.1, 101.1, 100.9, 100.9, 88.6, 88.6, 62.1, 61.5, 58.4, 57.5, 56.0, 55.9, 54.3, 51.9, 48.2, 48.1, 35.7, 35.6, 31.9, 29.9, 29.9, 29.7, 22.7.

**IR** (film) $\nu_{\max}$ : 3423, 2902, 1589, 1452, 1321 cm<sup>-1</sup>.

**HRMS** (ESI-TOF)  $m/z$ : [M+H]<sup>+</sup> Calcd for [C<sub>33</sub>H<sub>32</sub>N<sub>2</sub>O<sub>5</sub> + H]<sup>+</sup> 537.2390; Found 537.2391.

$[\alpha]_D^{25.0} = -36.2$  ( $c = 0.04$  g/ml, CHCl<sub>3</sub>)

Enantiomeric excess of pure compound was determined via HPLC analysis using a Chiralpak OD-H column [solvent: hexane/2-propanol = 70/30; flow rate: 1.0 mL/min; detection: at 254 nm, 93% ee]:  $t_R$  major = 14.370 min,  $t_R$  minor = 18.857 min, for one of the diastereomer, and  $t_R$  major = 23.586 min,  $t_R$  minor = 29.402 min, for the other diastereomer.

Compound ( $\pm$ )-**26** (8-10 mg) was dissolved in 1 mL of *i*-PrOH and allowed for slow evaporation at 22 °C for 21 days. This resulted yellow crystal grow for one of the diastereomers. Crystal data (CCDC: **2363948**) given later part of the supporting information.

The  $^1\text{H}$  NMR analysis of yellow solid crystals of **26b** in  $\text{CDCl}_3$  showed the data for single atropodiastereomer. However, when  $^{13}\text{C}$  NMR of **26b** was recorded after 24 h, we observed the generation of double peaks for each carbon, clearly indicting single diastereomer converting to a mixture of atropodiastereomers at room temperature within a day. To confirm this, we immediately recorded  $^1\text{H}$  NMR spectra of the same sample of **26b** and confirmed this fact.

The  $^1\text{H}$ -NMR characterization data of **26b** given below and all the NMR spectra of diastereomeric mixtures have been given in spectral traces.

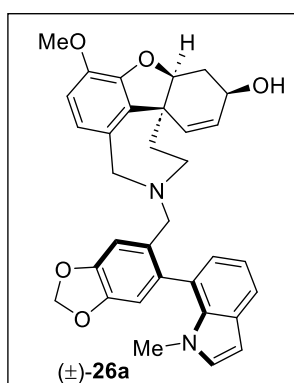

(4*a*S,6*R*,8*a*S)-3-methoxy-11-((6-(1-methyl-1*H*-indol-7-yl)benzo[*d*][1,3]dioxol-5-yl)methyl)-4*a*,5,9,10,11,12-hexahydro-6*H*-benzo[2,3]benzofuro[4,3-*cd*]azepin-6-ol [( $\pm$ )-**26**]: Yellow crystalline solid.

$^1\text{H}$  NMR (400 MHz,  $\text{CDCl}_3$ ) (mixed with *i*PrOH):  $\delta$  7.56 (dd,  $J = 7.9, 1.2$  Hz, 1H), 7.04 (dd,  $J = 7.9, 7.1$  Hz, 1H), 6.99 (s, 1H), 6.89 (d,  $J = 1.2$  Hz, 1H), 6.85 (d,  $J = 3.1$  Hz, 1H), 6.79 (s, 1H), 6.55 (d,  $J = 8.2$  Hz, 1H), 6.46 (d,  $J = 3.1$  Hz, 1H), 6.39 (d,  $J = 8.2$  Hz, 1H), 6.04 – 5.96 (m, 2H), 5.95 – 5.86 (m, 2H), 4.40 (s, 1H), 4.04 (br s, 1H), [4.06 – 3.93 (m, 1H), *i*PrOH, C-H proton], 3.79 (s, 3H), 3.49 (d,  $J = 15.3$  Hz, 1H), 3.29 (q, 3H), 3.16 (s, 3H), 2.96 (t,  $J = 13.3$  Hz, 1H), 2.70 – 2.56 (m, 2H), 2.36 (d,  $J = 11.3$  Hz, 1H), 1.90 (ddd,  $J = 15.7, 4.9, 2.3$  Hz, 1H), 1.53 (dd,  $J = 13.1, 3.2$  Hz, 1H), 1.33 – 1.28 (m, 1H), [1.20 (s, 3H), 1.19 (s, 3H) for *i*PrOH].

**Hydrogenation of dehydro narcipavline synthesis of narcipavline [(-)-1]:**

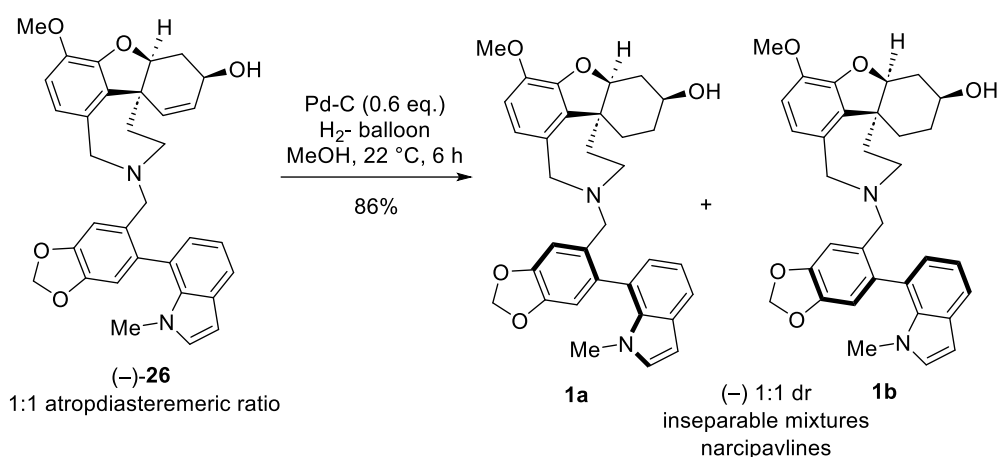

An oven-dried round bottom flask was charged with compound **(-)-26** (1:1 dr of **26a** and **26b**) (250 mg, 0.465 mmol, 1.0 equiv.) in 4 mL of MeOH under nitrogen atmosphere. Next, the reaction mixture was degassed for 10 min using N<sub>2</sub>-balloon. Then, Pd-C (150 mg, 60 vol% wt/wt) was added and H<sub>2</sub>-balloon was purged into the solution and stirring was continued for 6 h at 22 °C. Upon complete consumption of the starting materials (monitored by TLC analysis), H<sub>2</sub>-balloon was removed. The reaction mixture was filtered and washed with MeOH, and evaporated the solvent under reduced pressure. The crude product was purified by flash chromatography using 50% EtOAc/hexane as eluent to afford **(-)-narcipavline (1)** (215 mg, 86%) as a 1:1 diastereomeric mixtures [single spot on the TLC and are inseparable by column chromatography].

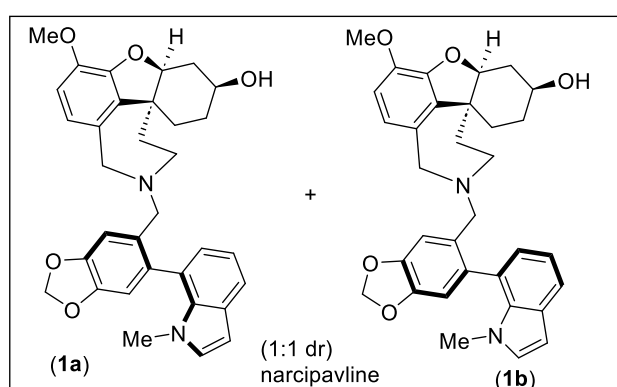

**(4a*S*,6*S*,8a*R*)-3-Methoxy-11-((6-(1-methyl-1*H*-indol-7-yl)benzo[*d*][1,3]dioxol-5-yl)methyl)-4a,5,7,8,9,10,11,12-octahydro-6*H*-benzo[2,3]benzofuro[4,3-*cd*]azepin-6-ol**  
**[(-)-1]:** Compound **(-)-1** was obtained as yellow gummy mass as 1:1 diastereomeric ratio of **1a**

and **1b**. (0.465 mmol scale of reaction, 215 mg of product, 86% yield);  $R_f = 0.35$  (70% EtOAc in *n*-hexane). This showed single spot on TLC and are inseparable by column chromatography.

**<sup>1</sup>H NMR** [1:1 dr of **1a** and **1b**] (400 MHz, CDCl<sub>3</sub>): δ 7.46 (td,  $J = 7.7, 1.2$  Hz, 2H), 7.03 (s, 1H), 7.01 (s, 1H), 7.03 – 6.96 (m, 1H), 6.97 (d,  $J = 7.9$  Hz, 1H), 6.92 (d,  $J = 3.2$  Hz, 1H), 6.88 (dd,  $J = 7.9, 7.1$  Hz, 1H), 6.83 (dd,  $J = 7.2, 1.2$  Hz, 1H), 6.75 (s, 1H), 6.74 (s, 1H), 6.64 (d,  $J = 1.6$  Hz, 1H), 6.62 (d,  $J = 2.7$  Hz, 1H), 6.55 (d,  $J = 8.2$  Hz, 1H), 6.42 (d,  $J = 3.1$  Hz, 1H), 6.38 (d,  $J = 3.2$  Hz, 1H), 6.33 (d,  $J = 8.1$  Hz, 1H), 6.29 (d,  $J = 8.2$  Hz, 1H), 6.02 – 5.95 (m, 4H), 4.59 (br s, 1H), 3.98-3.93 (m, 4H), 3.84 (d,  $J = 6.3$  Hz, 2H), 3.78 (s, 3H), 3.75 (s, 3H), 3.53 (d,  $J = 8.0$  Hz, 1H), 3.49 (d,  $J = 7.9$  Hz, 1H), 3.34 (t,  $J = 14.7$  Hz, 2H), 3.25 (s, 3H), 3.26 – 3.14 (m, 2H), 3.14 (s, 3H), 2.92 (dd,  $J = 14.9, 10.8$  Hz, 2H), 2.69 (dd,  $J = 14.5, 4.4$  Hz, 2H), 2.25 – 2.12 (m, 2H), 1.88–1.76 (m, 2H), 1.72 – 1.49 (m, 8H), 1.36 – 1.27 (m, 4H).

**<sup>13</sup>C {<sup>1</sup>H} NMR** [1:1 dr of **1a** and **1b**] (126 MHz, CDCl<sub>3</sub>): δ 148.9, 148.8, 147.84, 147.77, 147.7, 147.4, 145.4, 145.3, 137.3, 137.2, 135.9, 135.8, 135.2, 134.8, 132.5, 131.84, 131.79, 131.2, 131.1, 129.7, 125.9, 125.7, 124.9, 122.7, 122.5, 121.1, 121.0, 119.7, 119.6, 112.8, 112.6, 111.9, 111.8, 110.1, 109.9, 102.63, 102.59, 101.87, 101.85, 90.4, 90.3, 65.88, 65.86, 59.2, 58.8, 56.71, 56.67, 55.5, 54.3, 52.6, 52.5, 47.9, 47.8, 36.1, 35.8, 33.1, 32.9, 32.74, 32.68, 27.9, 27.8, 25.3, 25.2.

**IR** (film) $\nu_{\max}$ : 3406, 2927, 1684, 1446, 1222, 1039, 933 cm<sup>-1</sup>.

**HRMS** (ESI-TOF)  $m/z$ : [M+H]<sup>+</sup> Calcd for [C<sub>33</sub>H<sub>34</sub>N<sub>2</sub>O<sub>5</sub> + H]<sup>+</sup> 539.2546; Found 539.2560.

$[\alpha]_D^{25.0} = -34.00$  ( $c = 0.0025$  g/ml, CHCl<sub>3</sub>) for 1:1 atropdiastereomeric mixture.

Enantiomeric excess of pure compound was determined via HPLC analysis using a Chiralpak OD-H column [solvent: hexane/2-propanol = 60/40; flow rate: 1.0 mL/min; detection at 254 nm; 94% ee.]:  $t_R$  major = 11.579 min,  $t_R$  minor = 12.634 min for one of the diastereomers and  $t_R$  major = 14.898 min,  $t_R$  minor = 20.023 min for the other diastereomer [dr was found to be ~ 1:1].

**Synthesis of Narcikachnine (2) from Narcipavline (1):**

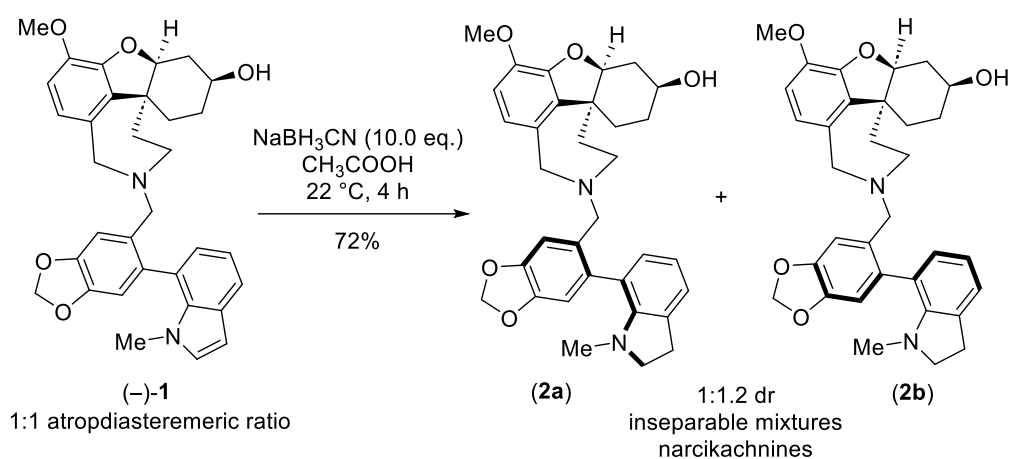

In a 25 ml round bottom flask, narcipavlines (-)-**1** (dr ~ 1:1) (150 mg, 0.278 mmol, 1.0 equiv.) was dissolved in 2 mL of AcOH and the reaction mixture placed in an ice bath. Then,  $\text{NaBH}_3\text{CN}$  (175 mg, 2.78 mmol, 10.0 equiv.) was added to the residue at 0 °C portion wise and the stirring was continued at room temperature for 4 h. After complete consumption of starting material (monitored by TLC in 5% MeOH in  $\text{CH}_2\text{Cl}_2$ ), the reaction was quenched by adding water (2 mL). Next, most of the AcOH was removed under vacuum and the residue was treated with NaOH aqueous solution. Next, the reaction was extracted with  $\text{CH}_2\text{Cl}_2$  (10 mL X 2) by maintaining the pH 8-10. The organic layers were combined and dried over  $\text{Na}_2\text{SO}_4$  and the solvent was removed under the reduced pressure. Finally, the residual raw product was purified by chromatography (neutral alumina, 60% EtOAc/*n*-hexane to 5% MeOH/ $\text{CH}_2\text{Cl}_2$ ) obtain (-)-narcikachnine (**2**) (108 mg, 72%) as dr ~ 1:1 for **2a** and **2b**. These diastereomers showed single spot-on TLC and were found to be inseparable in column chromatography.

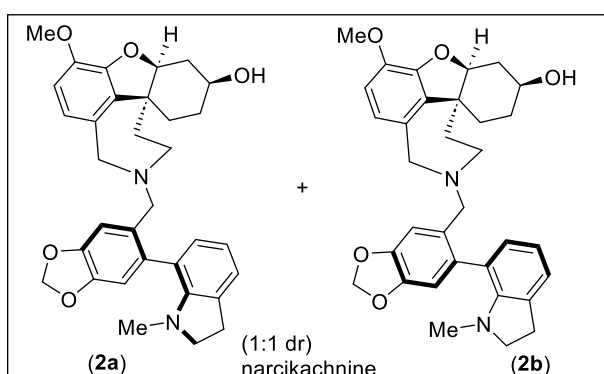

(4*aS*,6*S*,8*aR*)-3-Methoxy-11-((6-(1-methylindolin-7-yl)benzo[*d*][1,3]dioxol-5-yl)methyl)-4*a*,5,7,8,9,10,11,12-octahydro-6*H*-benzo[2,3]benzofuro[4,3-*cd*]azepin-6-ol      [(-)-**2**]:



Compound (–)-**2** was obtained as white solid. (0.278 mmol scale of reaction, 107 mg of product, 90% yield) as 1: 1 (**2a**: **2b**) atropdiastereomeric mixture;  $R_f = 0.3$  (5% MeOH in  $\text{CH}_2\text{Cl}_2$ ). For comparison of  $^1\text{H}$ -NMR and  $^{13}\text{C}$ - $\{^1\text{H}\}$  NMR with the isolation paper, the NMRs of **2** were recorded in  $\text{CD}_3\text{OD}$  and  $\text{CDCl}_3$ .

$^1\text{H}$  NMR (400 MHz,  $\text{CD}_3\text{OD}$ ) [ $\sim$ 1:1 dr of **2a**: **2b**]:  $\delta$  7.04 (dd,  $J = 9.1, 2.7$  Hz, 4H), 6.83 (d,  $J = 7.5$  Hz, 1H), 6.78 – 6.67 (m, 7H), 6.55 (d,  $J = 8.6$  Hz, 1H), 6.41 (s, 1H), 6.00 (dd,  $J = 10.1, 3.3$  Hz, 4H), 4.59 (s, 2H), 4.24 (s, 1H), 4.13 – 3.96 (m, 5H), 3.84 (s, 3H), 3.84 (s, 3H), 3.79 (d,  $J = 15.4$  Hz, 2H), 3.61 (d,  $J = 35.8$  Hz, 2H), 3.53 – 3.41 (m, 2H), 3.29 – 3.18 (m, 2H), 3.08 (d,  $J = 14.1$  Hz, 2H), 2.98 – 2.89 (m, 4H), 2.87 – 2.76 (m, 2H), 2.70 (m, 2H), 2.31 (d,  $J = 16.3$  Hz, 1H), 2.24 (d,  $J = 10.5$  Hz, 1H), 2.24 (s, 3H), 2.14 (s, 3H), 1.98 (dt,  $J = 15.8, 4.5$  Hz, 1H), 1.89 (dd,  $J = 16.0, 4.4$  Hz, 1H), 1.85 – 1.60 (m, 8H), 1.50 – 1.40 (m, 2H), 1.37 – 1.32 (m, 2H).

$^1\text{H}$  NMR (400 MHz,  $\text{CDCl}_3$ ) [ $\sim$ 1:1 dr of **2a**: **2b**]:  $\delta$  7.06 (d,  $J = 2.0$  Hz, 1H), 7.01 (s, 1H), 6.99 (s, 1H), 6.84 – 6.76 (m, 1H), 6.74 (s, 1H), 6.71 (s, 1H), 6.70 – 6.60 (m, 3H), 6.64 – 6.54 (m, 3H), 6.52 (d,  $J = 8.2$  Hz, 1H), 6.39 (d,  $J = 8.3$  Hz, 1H), 5.97 – 5.96 (m, 4H), 4.26 – 4.25 (m, 1H), 4.12 – 3.99 (m, 5H), 3.85 (s, 3H), 3.84 (s, 3H), 3.80 – 3.61 (m, 2H), 3.55 – 3.36 (m, 4H), 3.26 – 3.21 (m, 2H), 3.04 – 3.02 (m, 2H), 2.95 – 2.86 (m, 4H), 2.83 – 2.74 (m, 2H), 2.44 (t,  $J = 15.3$  Hz, 2H), 2.22 (s, 3H), 2.15 (s, 3H), 1.87 – 1.58 (m, 14H), 1.36 – 1.28 (m, 3H).

$^{13}\text{C}$   $\{^1\text{H}\}$  NMR (126 MHz,  $\text{CD}_3\text{OD}$ ) [ $\sim$ 1:1 dr of **2a**: **2b**]:  $\delta$  150.5, 149.8, 147.3, 146.8, 146.6, 146.41, 144.1, 135.9, 135.7, 134.20, 131.2, 130.2, 129.9, 123.3, 123.1, 121.4, 118.4, 111.5, 111.3, 110.1, 109.7, 108.5, 101.24, 101.19, 89.1, 88.9, 64.5, 58.3, 56.7, 56.4, 55.3, 51.7, 49.8, 46.6, 46.5, 31.38, 31.35, 30.82, 30.75, 28.2, 28.0, 26.5, 24.0, 23.9.

$^{13}\text{C}$   $\{^1\text{H}\}$  NMR (126 MHz,  $\text{CDCl}_3$ ) [ $\sim$ 1:1 dr of **2a**: **2b**]:  $\delta$  150.6, 150.4, 146.9, 145.9, 144.0, 136.6, 133.5, 131.1, 130.5, 130.2, 124.1, 123.5, 123.3, 123.0, 121.8, 118.0, 115.9, 110.6, 110.4, 110.3, 108.9, 108.5, 101.1, 101.0, 90.0, 89.8, 65.5, 65.4, 58.5, 57.1, 56.9, 56.0, 55.9, 52.3, 46.7, 46.6, 38.8, 38.7, 31.9, 31.6, 31.5, 31.4, 28.7, 28.5, 27.68, 27.65, 23.8.

IR (film) $\nu_{\text{max}}$ : 3385, 2925, 1462, 1264, 1040  $\text{cm}^{-1}$ .

HRMS (ESI-TOF)  $m/z$ :  $[\text{M}+\text{H}]^+$  Calcd for  $[\text{C}_{33}\text{H}_{36}\text{N}_2\text{O}_5 + \text{H}]^+$  541.2703; Found 541.2691.

$[\alpha]_D^{25.0} = -31.40$  ( $c = 0.0025$  g/ml,  $\text{CHCl}_3$ ) for atropodiastereomeric mixtures.

VT experiment shows remarkable change in different temperature. At the higher experimental temperature, the proton resonances towards coalesced for both diastereomers. Although we can achieve only up to 65 °C, still the changes are clear, which proves that **2a** and **2b** are the atropodiastereomers. The peak near 4.15 coalesced, and the *N*-methyl peak 2.0, and 2.1 changes happened. After cooling back to RT (298 K), we observed 1:1 ratio of atropodiastereomeric mixtures along with decomposition.

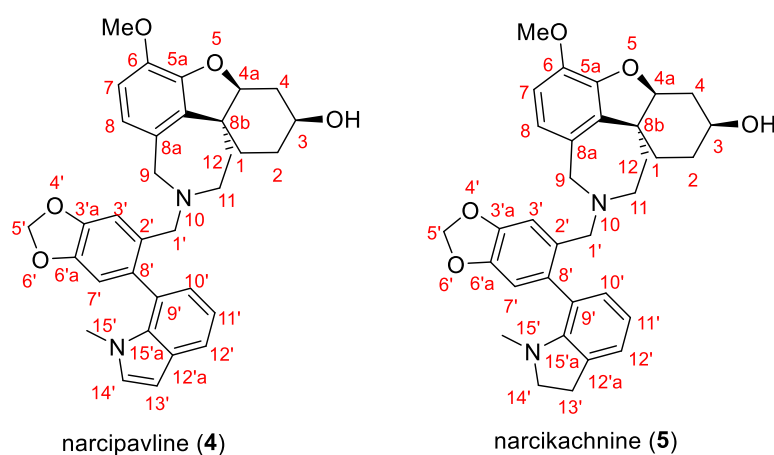

**Comparison of  $^1\text{H-NMR}$  Data of (-)-narcipavline [(-)-1] of this report with natural (1) by Cahlíková:<sup>4</sup>**

|    | Cahlíková's isolation report<br>( $^1\text{H-NMR}$ , 500 MHz, $\text{CD}_3\text{OD}$ ) <sup>4</sup> | This report<br>( $^1\text{H-NMR}$ , 500 MHz, $\text{CD}_3\text{OD}$ )  |
|----|-----------------------------------------------------------------------------------------------------|------------------------------------------------------------------------|
| 1  | 1.72-1.53 m                                                                                         | 1.72–1.49 (m, 4H)                                                      |
| 2  | 1.72-1.53 and 1.42-1.23 m                                                                           | 1.72–1.49 (m, 2H) 1.36 –1.27 (m, 2H)                                   |
| 3  | 4.02-3.93 m                                                                                         | 3.98-3.93 (m, 2H)                                                      |
| 4  | 2.25-2.15 and 1.91-1.77 m                                                                           | 2.25 – 2.12 (m, 2H) and 1.82 (dddd, $J = 24.8, 16.0, 5.3, 4.1$ Hz, 2H) |
| 4a | 4.02-3.93 and 3.87-3.80 m                                                                           | 3.98-3.93 (m, 2H)                                                      |
| 5a |                                                                                                     |                                                                        |
| 6  |                                                                                                     |                                                                        |

|      |                                                                                 |                                                                                       |
|------|---------------------------------------------------------------------------------|---------------------------------------------------------------------------------------|
| 7    | 6.66-6.63 m and 6.56 d ( $J = 8.2$ Hz)                                          | 6.62 (d, $J = 2.7$ Hz, 1H) and 6.55 (d, $J = 8.2$ Hz, 1H)                             |
| 8    | 6.34 d ( $J = 8.2$ Hz) and 6.29 ( $J = 8.2$ Hz)                                 | 6.33 (d, $J = 8.1$ Hz, 1H) and 6.29 (d, $J = 8.2$ Hz, 1H)                             |
| 8a   |                                                                                 |                                                                                       |
| 8b   |                                                                                 |                                                                                       |
| 9    | 3.87-3.80, 3.78-3.72 and 3.54-3.45 m                                            | 3.84 (d, $J = 6.3$ Hz, 2H) and 3.53 (d, $J = 8.0$ Hz, 1H), 3.49 (d, $J = 7.9$ Hz, 1H) |
| 11   | 2.96-2.87 and 2.71-2.64 m                                                       | 2.92 (dd, $J = 14.9, 10.8$ Hz, 2H), and 2.69 (dd, $J = 14.5, 4.4$ Hz, 2H)             |
| 12   | 1.42-1.23 m                                                                     | 1.72-1.49 (m, 2H), 1.36-1.27 (m, 2H)                                                  |
| 13   | 3.36-3.24 m and 3.24                                                            |                                                                                       |
| 1'   | 3.11 m                                                                          | 3.34 (t, $J = 14.7$ Hz, 2H) and 3.26-3.14 (m, 2H)                                     |
| 2'   |                                                                                 |                                                                                       |
| 3'   | 7.03 and 7.01 s                                                                 | 7.03 (s, 1H) and 7.01 (s, 1H)                                                         |
| 3'a  |                                                                                 |                                                                                       |
| 5'   | 6.01- 5.99 m                                                                    | 6.02 - 5.95 (m, 4H)                                                                   |
| 6'a  |                                                                                 |                                                                                       |
| 7'   | 6.76 and 6.74 s                                                                 | 6.75 (s, 1H) and 6.74 (s, 1H)                                                         |
| 8'   |                                                                                 |                                                                                       |
| 9'   |                                                                                 |                                                                                       |
| 10'  | 6.83 dd ( $J = 7.4$ Hz, $J = 1.0$ Hz) and 6.66-6.63 m                           | 6.83 (dd, $J = 7.2, 1.2$ Hz, 1H) and 6.64 (d, $J = 1.6$ Hz, 1H)                       |
| 11'  | 7.03-6.96 and 6.89 t ( $J = 7.4$ Hz)                                            | 6.92 (d, $J = 3.2$ Hz, 1H), 6.88 (dd, $J = 7.9, 7.1$ Hz, 1H)                          |
| 12'  | 7.48 dd ( $J = 7.7$ Hz, $J = 1.0$ Hz) and 7.46 dd ( $J = 7.7$ Hz, $J = 1.0$ Hz) | 7.46 (td, $J = 7.7, 1.2$ Hz, 2H)                                                      |
| 12'a |                                                                                 |                                                                                       |

|                       |                                               |                                                           |
|-----------------------|-----------------------------------------------|-----------------------------------------------------------|
| 13'                   | 6.43 d ( $J=2.9$ Hz) and 6.39 d ( $J=2.9$ Hz) | 6.42 (d, $J = 3.1$ Hz, 1H) and 6.38 (d, $J = 3.2$ Hz, 1H) |
| 14'                   | 7.03-6.96 and 6.94-6.92 m                     | 7.03–6.96 (m, 1H) and 6.97 (d, $J = 7.9$ Hz, 1H)          |
| 15'a                  |                                               |                                                           |
| 6-OCH <sub>3</sub>    | 3.80 and 3.77 s                               | 3.78 (s, 3H) and 3.75 (s, 3H)                             |
| 15'-N CH <sub>3</sub> | 3.27 and 3.16 s                               | 3.25 (s, 3H) and 3.14 (s, 3H)                             |
| O-H                   |                                               | 4.59 (bs, 2 H)                                            |

**Comparison of <sup>13</sup>C-NMR Data of (-)-narcipavline [(-)-**1**] of this report with isolation of (**1**) by Cahlíková:<sup>4</sup>**

|    | Cahlíková's isolation report<br>( <sup>13</sup> C-NMR, 500 MHz, CD <sub>3</sub> OD) <sup>4</sup> | This report<br>( <sup>13</sup> C-NMR, 500 MHz, CD <sub>3</sub> OD) |
|----|--------------------------------------------------------------------------------------------------|--------------------------------------------------------------------|
| 1  | 25.3 and 25.2                                                                                    | 25.3 and 25.2                                                      |
| 2  | 27.9 and 27.8                                                                                    | 27.9 and 27.8                                                      |
| 3  | 65.9 and 65.9                                                                                    | 65.88 and 65.86                                                    |
| 4  | 32.8 and 32.7                                                                                    | 32.74 and 32.68                                                    |
| 4a | 90.4 and 90.4                                                                                    | 90.4 and 90.3                                                      |
| 5a | 147.8 and 147.8                                                                                  | 147.84 and 147.77                                                  |
| 6  | 145.3 and 145.1                                                                                  | 145.4 and 145.3                                                    |
| 7  | 112.7 and 112.6                                                                                  | 112.8 and 112.6                                                    |
| 8  | 122.6 and 122.3                                                                                  | 122.7 and 122.5                                                    |
| 8a | 130.3                                                                                            | 129.7                                                              |
| 8b | 137.4 and 137.2                                                                                  | 137.3 and 137.2                                                    |
| 9  | 59.3 and 58.7                                                                                    | 59.2 and 58.8                                                      |
| 11 | 52.6 and 52.5                                                                                    | 52.6 and 52.5                                                      |
| 12 | 33.1 and 32.3                                                                                    | 33.1 and 32.9                                                      |
| 13 | 48.0 and 47.9                                                                                    | 47.9 and 47.8                                                      |
| 1' | 55.4 and 54.2                                                                                    | 55.5 and 54.3                                                      |
| 2' | 133.1 and 132.9                                                                                  | 132.5                                                              |
| 3' | 110.1 and 109.9                                                                                  | 110.1 and 109.9                                                    |

|                       |                 |                   |
|-----------------------|-----------------|-------------------|
| 3'a                   | 148.8 and 148.8 | 148.9 and 148.8   |
| 5'                    | 102.6 and 102.5 | 102.63 and 102.59 |
| 6'a                   | 147.5 and 147.3 | 147.7 and 147.4   |
| 7'                    | 111.9 and 111.8 | 111.9 and 111.8   |
| 8'                    | 135.0 and 134.7 | 135.2 and 134.8   |
| 9'                    | 126.0 and 125.8 | 125.9 and 125.7   |
| 10'                   | 124.9           | 124.9             |
| 11'                   | 119.7 and 119.6 | 119.7 and 119.6   |
| 12'                   | 121.0 and 120.9 | 121.1 and 121.0   |
| 12'a                  | 131.2 and 131.1 | 131.2 and 131.1   |
| 13'                   | 101.8 and 101.8 | 101.87 and 101.85 |
| 14'                   | 131.8 and 131.7 | 131.84, 131.79    |
| 15'a                  | 135.9 and 135.8 | 135.9 and 135.8   |
| 6-OCH <sub>3</sub>    | 56.7 and 56.7   | 56.71 and 56.67   |
| 15'-N CH <sub>3</sub> | 36.0 and 35.8   | 36.1 and 35.8     |

**Comparison of <sup>1</sup>H-NMR data of (-)-narcikachnine [(-)-**2**] with isolation of (**2**) by Cahlíková:<sup>4</sup>**

|    | Cahlíková's isolation report<br>( <sup>1</sup> H-NMR, 500 MHz, CDCl <sub>3</sub> ) <sup>4</sup> | This report in<br>( <sup>1</sup> H-NMR, 500 MHz, CD <sub>3</sub> OD)                        | This report in<br>( <sup>1</sup> H-NMR, 400 MHz, CDCl <sub>3</sub> ) |
|----|-------------------------------------------------------------------------------------------------|---------------------------------------------------------------------------------------------|----------------------------------------------------------------------|
| 1  | 1.88–1.47 m                                                                                     | 1.85–1.60 (m, 2H), 1.50 – 1.40 (m, 2H)                                                      | 1.87–1.58 m                                                          |
| 2  | 1.88–1.47 m                                                                                     | 1.85 –1.60 (m, 4H)                                                                          | 1.87–1.58 m                                                          |
| 3  | 4.04 bs                                                                                         | 4.24 (bs, 1H), 4.13–3.96 (m, 1H)                                                            | 4.12–3.99                                                            |
| 4  | 2.46 t ( <i>J</i> = 8.2 Hz) and 1.88–1.47 m                                                     | 2.70 (m, 2H), 2.24 (d, <i>J</i> = 10.5 Hz, 1H), and 1.98 (dt, <i>J</i> = 15.8, 4.5 Hz, 1H), | 2.44 (t, <i>J</i> = 15.3 Hz) and 1.87–1.58 m                         |
| 4a | 4.28–4.25 and 4.14–4.11 m                                                                       | 4.13–3.96 (m, 2H)                                                                           | 4.26–4.25 m and 4.12–3.99 m                                          |
| 5a |                                                                                                 |                                                                                             |                                                                      |
| 6  |                                                                                                 |                                                                                             |                                                                      |

|      |                                                                                            |                                                    |                                                   |
|------|--------------------------------------------------------------------------------------------|----------------------------------------------------|---------------------------------------------------|
| 7    | 6.62–6.57 m                                                                                | 6.78–6.67 (m, 2H)                                  | 6.64 – 6.54 m                                     |
| 8    | 6.51 d ( $J = 8.3$ Hz) and 6.40 ( $J = 8.3$ Hz)                                            | 6.55 (d, $J = 8.6$ Hz, 1H) and 6.41 (s, 1 H)       | 6.52 (d, $J = 8.2$ Hz) and 6.39 (d, $J = 8.3$ Hz) |
| 8a   |                                                                                            |                                                    |                                                   |
| 8b   |                                                                                            |                                                    |                                                   |
| 9    | 3.89 ( $J = 15.0$ Hz) d, 3.88 ( $J = 15.0$ Hz) and 3.65 d ( $J = 15.0$ Hz) and 3.52–3.43 m | 4.13–3.96 (m, 2H), 3.79 (d, $J = 15.4$ Hz, 2H)     | 4.12–3.99 m, 3.80–3.61 m, 3.55–3.36 m             |
| 11   | 3.05–2.85 and 2.83–2.72 m                                                                  | 2.98–2.89 (m, 4H)                                  | 2.95–2.86 m                                       |
| 12   | 1.88–1.47 and 1.44–1.37 m                                                                  | 1.85–1.60 (m, 2H), 1.37–1.32 (m, 2H)               | 1.87–1.58 m, 1.36–1.28 m                          |
| 13   |                                                                                            |                                                    |                                                   |
| 1'   | 3.52–3.42 m and 3.39–3.32 m                                                                | 3.61 (d, $J = 35.8$ Hz, 2H), and 3.53–3.41 (m, 2H) | 3.55 – 3.36 m                                     |
| 2'   |                                                                                            |                                                    |                                                   |
| 3'   | 7.06 and 7.04–6.99 m                                                                       | 7.11–7.02 (m, 2H)                                  | 7.06 d ( $J = 2.0$ Hz) and 7.01 s                 |
| 3'a  |                                                                                            |                                                    |                                                   |
| 5'   | 5.98–5.96 m                                                                                | 6.00, (dd, $J = 10.1, 3.3$ Hz, 4H)                 | 5.97 – 5.96 m                                     |
| 6'a  |                                                                                            |                                                    |                                                   |
| 7'   | 6.75 and 6.72 s                                                                            | 6.78–6.67 (m, 2 H)                                 | 6.74 s and 6.71 s                                 |
| 8'   |                                                                                            |                                                    |                                                   |
| 9'   |                                                                                            |                                                    |                                                   |
| 10'  | 6.82 d ( $J = 7.1$ Hz) and 6.68–6.62 m                                                     | 6.82 d ( $J = 7.5$ Hz, 1H) and 6.78–6.67 m (1 H)   | 6.84–6.76 m and 6.70–6.60 m                       |
| 11'  | 6.66 t ( $J = 7.1$ Hz) and 6.62–6.57 m                                                     | 6.78–6.67 (m, 2 H)                                 | 6.70–6.60 m                                       |
| 12'  | 7.04–6.99 m                                                                                | 7.11–7.02 (m, 2H)                                  | 6.99 s                                            |
| 12'a |                                                                                            |                                                    |                                                   |
| 13'  | 3.03–2.85 and 2.83–2.72 m                                                                  | 2.98–2.89 (m, 2H), and 2.87–2.76 (m, 2H)           | 2.95–2.86 m, 2.83–2.74 m                          |

|                       |                                                                                                 |                                                |                             |
|-----------------------|-------------------------------------------------------------------------------------------------|------------------------------------------------|-----------------------------|
| 14'                   | 3.31–3.21 m and 3.17 dd ( $J = 9.1$ Hz, $J = 9.1$ Hz) and 3.08 dd ( $J = 9.1$ Hz, $J = 9.1$ Hz) | 3.29–3.18 (m, 2H), 3.08 (d, $J = 14.1$ Hz, 2H) | 3.26–3.21 m and 3.04–3.02 m |
| 15'a                  |                                                                                                 |                                                |                             |
| 6-OCH <sub>3</sub>    | 3.85 s                                                                                          | 3.84 (s, 3H) and 3.84 (s, 3H)                  | 3.85 s, and 3.84 s          |
| 15'-N CH <sub>3</sub> | 2.23 and 2.18 s                                                                                 | 2.24 (s, 3H) and 2.14 (s, 3H)                  | 2.22 s and 2.15 s           |
| OH                    |                                                                                                 | 4.59 (bs, 2H)                                  |                             |

**Comparison of <sup>13</sup>C-NMR data of (-)-narcikachnine [(-)-**2**] with isolation of (**2**) by Cahlíková:<sup>4</sup>**

|    | Cahlíková's isolation report<br>( <sup>13</sup> C-NMR, 125 MHz, CDCl <sub>3</sub> ) <sup>4</sup> | This report<br>( <sup>13</sup> C-NMR, 126 MHz, CD <sub>3</sub> OD) | This report<br>( <sup>13</sup> C-NMR, 126 MHz, CDCl <sub>3</sub> ) |
|----|--------------------------------------------------------------------------------------------------|--------------------------------------------------------------------|--------------------------------------------------------------------|
| 1  | 23.8 and 23.7                                                                                    | 24.0 and 23.9                                                      | 23.8                                                               |
| 2  | 27.7                                                                                             | 26.5                                                               | 27.68, 27.65                                                       |
| 3  | 65.5 and 65.5                                                                                    | 64.5                                                               | 65.5 and 65.4                                                      |
| 4  | 31.5 and 31.4                                                                                    | 30.82 and 30.75                                                    | 31.5 and 31.4                                                      |
| 4a | 90.0 and 89.9                                                                                    | 89.1 and 88.9                                                      | 90.0 and 89.8                                                      |
| 5a | 146.0                                                                                            | 146.8                                                              | 145.9                                                              |
| 6  | 143.9                                                                                            | 144.1                                                              | 144.0                                                              |
| 7  | 110.6 and 110.5                                                                                  | 111.5 and 111.3                                                    | 110.6                                                              |
| 8  | 121.7 and 121.7                                                                                  | 121.4                                                              | 121.8                                                              |
| 8a | 130.1                                                                                            | 129.9                                                              | 130.2                                                              |
| 8b | 136.6                                                                                            | 135.9 and 135.7                                                    | 136.6                                                              |
| 9  | 58.6 and 58.3                                                                                    | 58.3                                                               | 58.5                                                               |
| 11 | 52.3 and 51.2                                                                                    | 51.7 and 49.8                                                      | 52.3                                                               |
| 12 | 32.1 and 31.2                                                                                    | 31.38 and 31.35                                                    | 31.9 and 31.6                                                      |
| 13 | 46.7 and 46.7                                                                                    | 46.6 and 46.5                                                      | 46.7 and 46.6                                                      |
| 1' | 54.9 and 53.7                                                                                    | 56.4                                                               | 52.4                                                               |

|                          |                 |                   |                 |
|--------------------------|-----------------|-------------------|-----------------|
| 2'                       | 131.9           | 131.2             |                 |
| 3'                       | 108.7 and 108.5 | 108.5             | 108.9 and 108.5 |
| 3'a                      | 146.9 and 146.9 | 147.3             | 146.9           |
| 5'                       | 100.9 and 100.9 | 101.24 and 101.19 | 101.1 and 101.0 |
| 6'a                      | 145.9 and 145.7 | 146.4 and 146.6   | 145.9           |
| 7'                       | 110.4 and 110.3 | 110.1 and 109.7   | 110.4 and 110.3 |
| 8'                       | 133.6 and 133.4 | 134.2             | 133.6 and 133.5 |
| 9'                       | 122.8 and 122.8 | 123.3 and 123.1   | 123.0           |
| 10'                      | 130.4 and 130.2 | 130.2             | 130.5           |
| 11'                      | 118.0 and 117.9 | 118.4             | 118.0           |
| 12'                      | 123.2           | 123.3             | 123.5 and 123.3 |
| 12'a                     | 131.0           | 131.2             | 131.1           |
| 13'                      | 28.6 and 28.6   | 28.2 and 28.0     | 28.7 and 28.5   |
| 14'                      | 57.1 and 56.9   | 56.6              | 57.1 and 56.9   |
| 15'a                     | 150.5 and 150.4 | 150.5 and 149.9   | 150.6 and 150.4 |
| 6-OCH <sub>3</sub>       | 55.9 and 55.9   | 55.3              | 56.0 and 55.9   |
| 15'-N<br>CH <sub>3</sub> | 38.7 and 38.7   | 37.9              | 38.8 and 38.7   |



## Theoretical Calculations: Methods

### Geometry optimization

The geometry optimizations for molecules narcipavline **1**, narcikachnine **2**, and galanthindole **7** were performed using Density Functional Theory (DFT) as implemented in Gaussian 16. The B3LYP functional was employed in combination with the 6-31G(d) basis set. All molecules were treated with a neutral charge (0) and a singlet spin state. The optimizations were carried out in the gas phase to ensure accurate energy minimization.

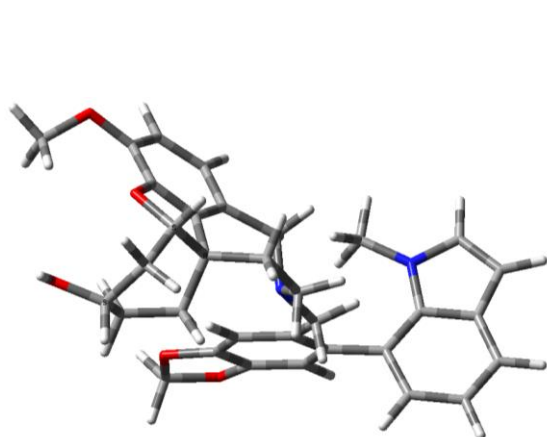

Energy minimized structure of **1a**

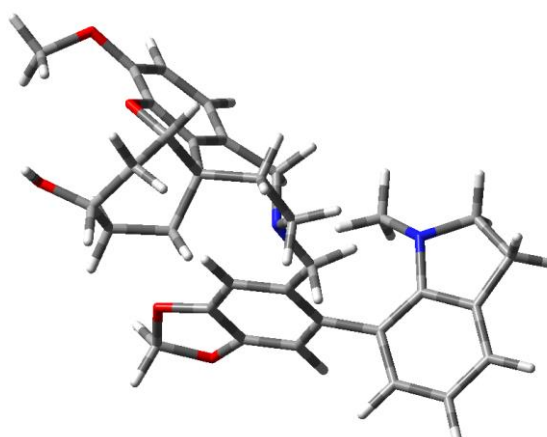

Energy minimized structure of **2a**

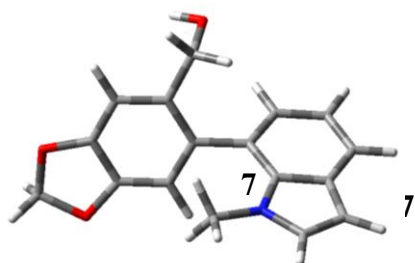

### Computational assessment of rotational energy barriers

To computationally assess the rotational barriers of atropisomers, we conducted relaxed torsion scans employing the B3LYP/6-31G(d) method with the `opt=modredundant` keyword. This approach effectively samples the potential energy surface (PES) for torsional motion. The rotation around the C-C bond of interest was simulated in 36 discrete steps, each involving a 10-degree rotation. At each step, the geometry was fully optimized with tight convergence criteria to ensure the accuracy of the results.

A torsion profile was generated by plotting the energy values obtained from the 36 geometry optimizations against the corresponding dihedral angles. This profile allowed us to identify and

characterize the transition states (TS) that emerged during the rotation around the bonds of interest. Each identified TS structure from the relaxed torsion scan was subsequently followed by transition state optimization using the same B3LYP/6-31G(d) method, confirming that these structures were first-order saddle points on the potential energy surface through vibrational frequency calculations.

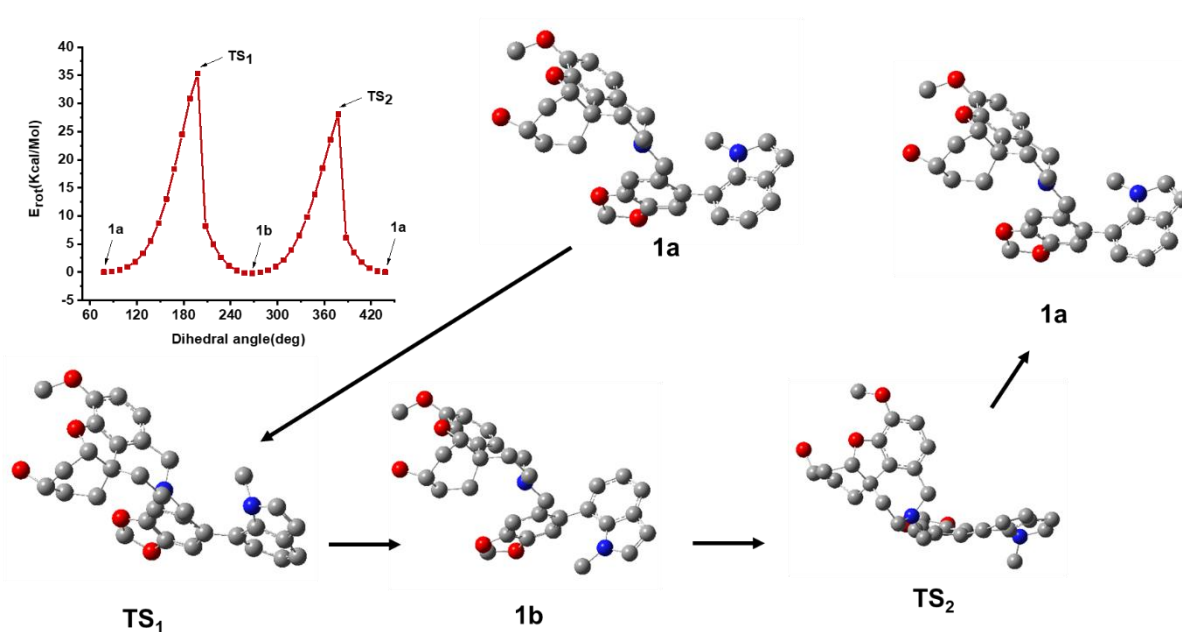

rotational energy barrier plot for narcipavline 1

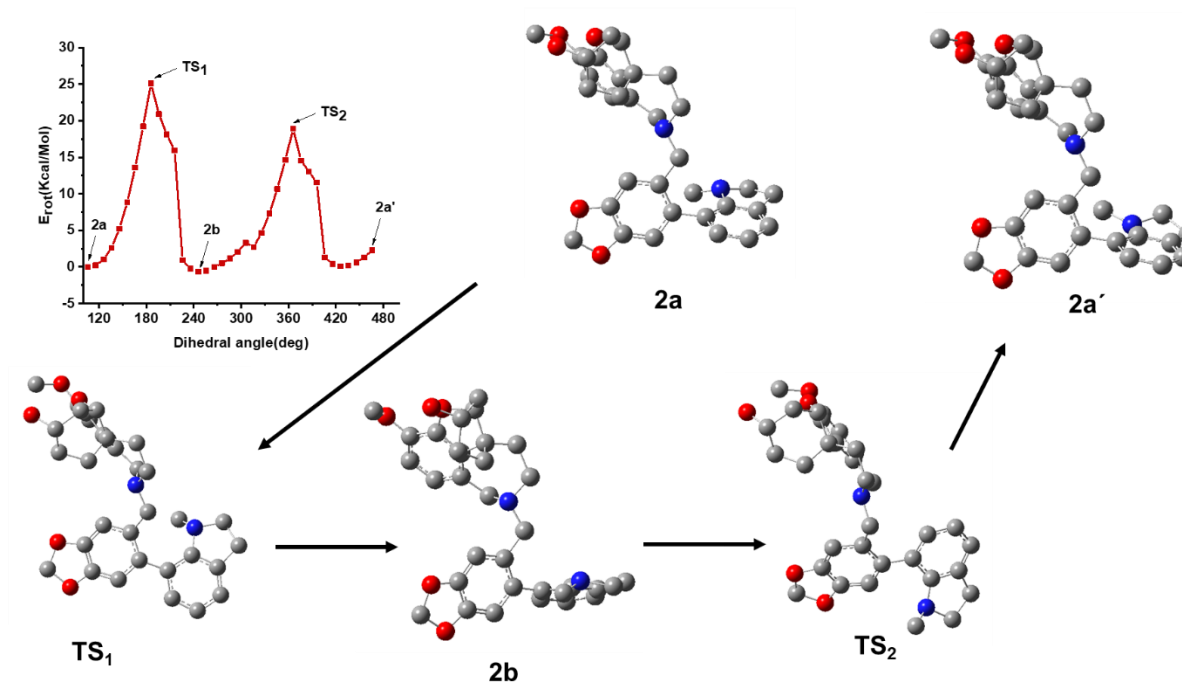

rotational energy barrier plot for narcikachnine 2

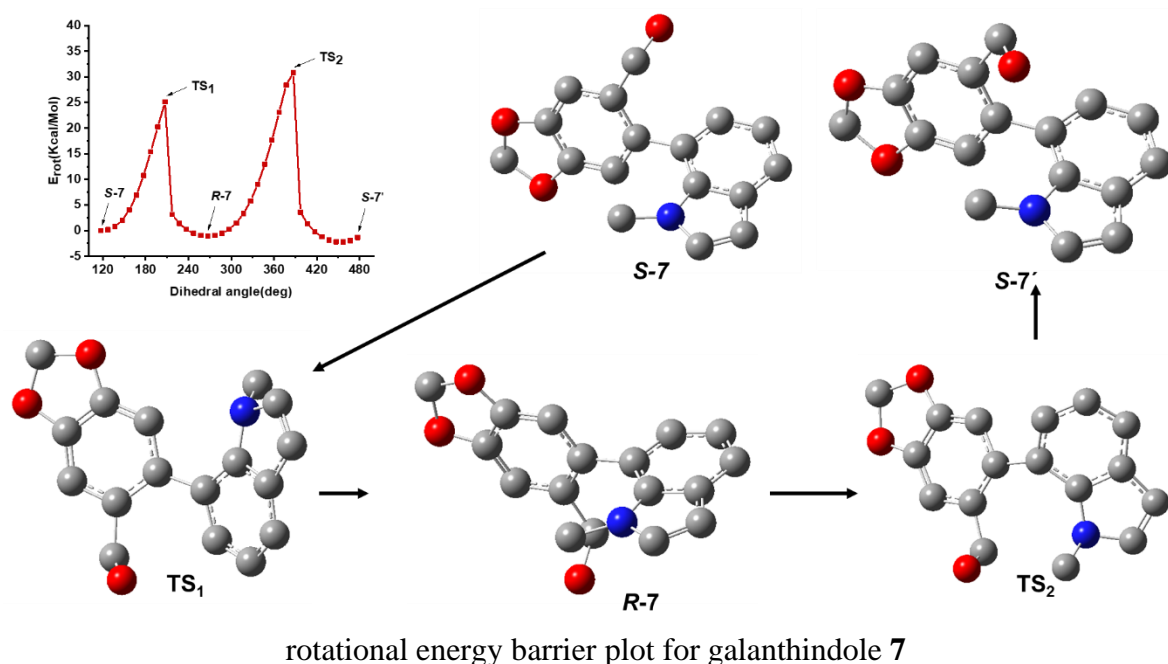

## Results and Discussion

The rotational energy barriers for the three molecules, narcipavline **1**, narcikachnine **2**, and galanthindole **7**, were computed to gain insights into their conformational dynamics, particularly concerning the potential for separating individual isomers. The rotational pathway was modeled as a 360-degree rotation around the C-C bond, divided into 36 discrete steps, with energy profiles indicating distinct transition states (TS<sub>1</sub> and TS<sub>2</sub>) along the pathway. The calculated rotational barriers are as follows: **1**: TS<sub>1</sub> = 35.35 kcal/mol, TS<sub>2</sub> = 28.09 kcal/mol; **2**: TS<sub>1</sub> = 25.08 kcal/mol, TS<sub>2</sub> = 18.90 kcal/mol; **7**: TS<sub>1</sub> = 25.09 kcal/mol, TS<sub>2</sub> = 30.78 kcal/mol.

| Molecules | $\Delta E$ (kcal/mol) |                 |
|-----------|-----------------------|-----------------|
|           | TS <sub>1</sub>       | TS <sub>2</sub> |
| <b>1a</b> | <b>35.35</b>          | <b>28.09</b>    |
| <b>2a</b> | <b>25.08</b>          | <b>18.90</b>    |
| <b>7</b>  | <b>25.09</b>          | <b>30.78</b>    |

For narcipavline **1**, the energy profile reveals that conformations **1a** and **1b** are different, indicating that these conformations are atropisomers of each other. After a full 360-degree rotation, conformations are the same, meaning **1** does not form distinct isomers at this point. The high energy barriers of 35.35 kcal/mol at TS<sub>1</sub> and 28.09 kcal/mol at TS<sub>2</sub> indicate significant intramolecular forces and steric hindrance during rotation. This substantial energy requirement

suggests that **1** is structurally rigid, making it less likely to undergo spontaneous conformational changes. This rigidity could facilitate the distinct separation of conformations **1a** and **1b**.

In contrast, narcikachnine **2** exhibits the lower energy barrier at TS<sub>1</sub> (25.08 kcal/mol) and TS<sub>2</sub> (18.90 kcal/mol), indicating greater rotational flexibility. The energy profile shows that conformations **2a**, **2b**, and **2a'** are all different. This suggests that the molecule undergoes significant structural changes throughout the rotation. The presence of distinct conformations implies that **2** can **readily form different isomers**, complicating the separation of **2a**, **2b**, and **2a'** due to the potential for multiple states in a mixture. The moderate energy peaks at TS<sub>1</sub> and TS<sub>2</sub> suggest weaker intramolecular interactions, allowing **2** to transition between conformations with less resistance, which could lead to challenges in effectively isolating the individual conformers.

Galanthindole **7** presents an intermediate energy barrier, with TS<sub>1</sub> at 25.09 kcal/mol and TS<sub>2</sub> at 30.78 kcal/mol, reflecting a balance between flexibility and rigidity. The energy profile indicates that conformations (*S*)-**7**, (*R*)-**7**, and (*S*)-**7'** are all different, suggesting that **7** also forms distinct conformers. The energy peaks at TS<sub>1</sub> and TS<sub>2</sub> indicate that **7** experiences moderate steric hindrance during rotation. This intermediate behaviour may allow for the possibility of selectively separating the distinct conformers (*S*)-**7**, (*R*)-**7**, and (*S*)-**7'**.

The optimized coordinates of narcipavline **1** are given below:

| Symbol | X        | Y        | Z        |
|--------|----------|----------|----------|
| C      | -2.89781 | 0.796643 | 3.056475 |
| C      | -1.66045 | 0.373727 | 2.567071 |
| C      | -1.55429 | -0.37199 | 1.381697 |
| C      | -2.74091 | -0.66236 | 0.706381 |
| C      | -3.97679 | -0.32541 | 1.255258 |
| C      | -4.09163 | 0.445091 | 2.416405 |
| C      | -2.98611 | -1.44975 | -0.57387 |
| C      | -4.48668 | -1.84004 | -0.35798 |
| O      | -5.03437 | -0.86401 | 0.573622 |
| C      | -2.85504 | -0.58763 | -1.86537 |
| C      | -4.05943 | 0.331565 | -2.0975  |
| C      | -5.34764 | -0.46497 | -2.35409 |

|   |          |          |          |
|---|----------|----------|----------|
| C | -5.33458 | -1.8298  | -1.62079 |
| C | -2.05777 | -2.67809 | -0.62029 |
| O | -6.43183 | 0.37051  | -1.94644 |
| H | -6.36272 | -2.12508 | -1.37602 |
| C | -0.20414 | -0.91725 | 0.951997 |
| C | -0.59442 | -2.37299 | -1.00183 |
| N | -0.04846 | -1.1052  | -0.4959  |
| C | 1.35158  | -0.97234 | -0.91654 |
| C | 1.902445 | 0.445947 | -0.8318  |
| C | 1.012857 | 1.538786 | -0.92762 |
| C | 1.543967 | 2.809872 | -0.90048 |
| C | 2.912596 | 3.032169 | -0.78812 |
| C | 3.805744 | 1.986406 | -0.69817 |
| C | 3.289906 | 0.668091 | -0.71439 |
| C | 4.270628 | -0.46602 | -0.68135 |
| C | 4.923231 | -0.92174 | 0.485991 |
| C | 5.888996 | -1.97481 | 0.441713 |
| C | 6.203161 | -2.58306 | -0.78438 |
| C | 5.562587 | -2.14498 | -1.93307 |
| C | 4.616314 | -1.10509 | -1.87536 |
| N | 4.80674  | -0.52924 | 1.814195 |
| C | 5.670884 | -1.29936 | 2.572936 |
| C | 6.346385 | -2.18698 | 1.782327 |
| O | 0.882734 | 4.015996 | -0.94846 |
| C | 1.907786 | 5.009122 | -1.05457 |
| O | 3.163921 | 4.384954 | -0.7621  |
| H | -5.43496 | -0.67048 | -3.43396 |
| O | -5.29022 | 0.795008 | 2.981653 |
| C | -6.21471 | 1.465007 | 2.116703 |
| C | 3.942129 | 0.494613 | 2.376415 |
| H | -7.25818 | -0.08598 | -2.16918 |
| H | -4.9408  | -2.60544 | -2.29184 |
| H | -4.5488  | -2.82098 | 0.136493 |
| H | -5.81214 | 2.43748  | 1.802558 |
| H | -7.11786 | 1.623516 | 2.71056  |
| H | -6.45161 | 0.869457 | 1.230085 |
| H | -2.96504 | 1.38623  | 3.965976 |
| H | 0.564562 | -0.21079 | 1.279905 |
| H | 0.003217 | -1.86214 | 1.494408 |
| H | -0.51238 | -2.32844 | -2.09418 |
| H | 0.024323 | -3.23357 | -0.67778 |
| H | -2.43363 | -3.41151 | -1.3484  |
| H | -2.09541 | -3.17242 | 0.358185 |
| H | -0.05443 | 1.369276 | -1.0037  |
| H | 4.87409  | 2.160616 | -0.62683 |
| H | 1.927392 | 5.40875  | -2.07877 |

|   |          |          |          |
|---|----------|----------|----------|
| H | 1.720094 | 5.805032 | -0.32843 |
| H | 4.141198 | -0.76714 | -2.79272 |
| H | 5.793837 | -2.59944 | -2.89269 |
| H | 6.937495 | -3.38353 | -0.82553 |
| H | 5.725149 | -1.14009 | 3.641703 |
| H | 7.079045 | -2.9102  | 2.11299  |
| H | 4.032575 | 0.457018 | 3.464624 |
| H | 2.897252 | 0.31873  | 2.106247 |
| H | 4.22141  | 1.495148 | 2.032622 |
| H | -0.75853 | 0.63082  | 3.117999 |
| H | 2.011204 | -1.65768 | -0.35606 |
| H | 1.404238 | -1.30678 | -1.96127 |
| H | -1.93054 | -0.0099  | -1.81099 |
| H | -4.22526 | 0.963044 | -1.21821 |
| H | -3.86891 | 1.008316 | -2.93778 |
| H | -2.74865 | -1.26468 | -2.72728 |

The optimized coordinates of narcikachnine **2** are given below:

| <b>Symbol</b> | <b>X</b> | <b>Y</b> | <b>Z</b> |
|---------------|----------|----------|----------|
| C             | -3.13232 | 0.496227 | 3.077696 |
| C             | -1.84839 | 0.150986 | 2.651179 |
| C             | -1.62889 | -0.47921 | 1.415298 |
| C             | -2.75093 | -0.73412 | 0.624631 |
| C             | -4.035   | -0.48015 | 1.102828 |
| C             | -4.26213 | 0.175941 | 2.316493 |
| C             | -2.87294 | -1.40514 | -0.73729 |
| C             | -4.37209 | -1.85132 | -0.67533 |
| O             | -5.02012 | -0.97915 | 0.293994 |
| C             | -2.67258 | -0.42436 | -1.93179 |
| C             | -3.88538 | 0.481212 | -2.17427 |
| C             | -5.12392 | -0.3212  | -2.60115 |
| C             | -5.12182 | -1.74687 | -1.99455 |
| C             | -1.90454 | -2.60022 | -0.8226  |
| O             | -6.26276 | 0.445064 | -2.20645 |
| H             | -6.1554  | -2.0897  | -1.85868 |
| C             | -0.23457 | -0.95122 | 1.044204 |
| C             | -0.42749 | -2.22297 | -1.06016 |
| N             | 0.033455 | -0.99397 | -0.3994  |
| C             | 1.454363 | -0.77481 | -0.69415 |
| C             | 1.922553 | 0.666448 | -0.52256 |
| C             | 0.974388 | 1.708546 | -0.45093 |
| C             | 1.440613 | 3.004239 | -0.37251 |
| C             | 2.798808 | 3.297326 | -0.37205 |
| C             | 3.748954 | 2.300818 | -0.44508 |

|   |          |          |          |
|---|----------|----------|----------|
| C | 3.304012 | 0.959758 | -0.51258 |
| C | 4.339713 | -0.11174 | -0.67773 |
| C | 4.698581 | -1.06052 | 0.30154  |
| C | 5.640364 | -2.06813 | 0.003388 |
| C | 6.270994 | -2.12849 | -1.22802 |
| C | 5.966335 | -1.16308 | -2.19521 |
| C | 5.013182 | -0.18782 | -1.91378 |
| N | 4.202656 | -1.23021 | 1.611062 |
| C | 5.107452 | -2.16636 | 2.306145 |
| C | 5.742241 | -3.00593 | 1.184862 |
| O | 0.715658 | 4.169584 | -0.26217 |
| C | 1.673531 | 5.226222 | -0.38129 |
| O | 2.982472 | 4.657225 | -0.25865 |
| H | -5.12267 | -0.42874 | -3.69865 |
| O | -5.51108 | 0.441869 | 2.815126 |
| C | -6.38711 | 1.16743  | 1.9448   |
| C | 3.798338 | -0.09917 | 2.433399 |
| H | -7.05448 | -0.01148 | -2.53144 |
| H | -4.65323 | -2.44706 | -2.69961 |
| H | -4.43969 | -2.87482 | -0.27702 |
| H | -5.99181 | 2.174053 | 1.752647 |
| H | -7.33724 | 1.248991 | 2.47788  |
| H | -6.53776 | 0.651417 | 0.991909 |
| H | -3.28733 | 0.997403 | 4.028557 |
| H | 0.488642 | -0.26823 | 1.499394 |
| H | -0.04314 | -1.9405  | 1.50707  |
| H | -0.266   | -2.07426 | -2.13416 |
| H | 0.193266 | -3.09392 | -0.76879 |
| H | -2.20094 | -3.27221 | -1.64115 |
| H | -1.99947 | -3.184   | 0.101247 |
| H | -0.08568 | 1.486178 | -0.45967 |
| H | 4.808998 | 2.530289 | -0.44111 |
| H | 1.57257  | 5.703658 | -1.36688 |
| H | 1.516429 | 5.952202 | 0.421511 |
| H | 4.758942 | 0.547717 | -2.67277 |
| H | 6.457944 | -1.17991 | -3.16362 |
| H | 6.998116 | -2.91039 | -1.43515 |
| H | 5.88668  | -1.60086 | 2.847957 |
| H | 6.76559  | -3.31443 | 1.42131  |
| H | 3.381928 | -0.48408 | 3.370387 |
| H | 4.646138 | 0.563713 | 2.681441 |
| H | 3.031652 | 0.4932   | 1.936239 |
| H | -0.99948 | 0.377898 | 3.29209  |
| H | 2.091643 | -1.44583 | -0.09404 |
| H | 1.619958 | -1.06385 | -1.74045 |
| H | -1.77376 | 0.168989 | -1.75451 |

|   |          |          |          |
|---|----------|----------|----------|
| H | -4.13782 | 1.025187 | -1.25785 |
| H | -3.65383 | 1.236679 | -2.93323 |
| H | -2.48014 | -1.01663 | -2.84003 |
| H | 5.157697 | -3.91881 | 1.002384 |
| H | 4.551545 | -2.75933 | 3.039837 |

The optimized coordinates of galanthindole **7** are given below:

| <b>Symbol</b> | <b>X</b> | <b>Y</b> | <b>Z</b> |
|---------------|----------|----------|----------|
| C             | -0.40543 | 2.387644 | 1.409649 |
| C             | -1.06685 | 1.221206 | 0.706561 |
| C             | -2.46299 | 1.066357 | 0.873802 |
| C             | -3.09609 | 0.054387 | 0.185476 |
| C             | -2.38973 | -0.80329 | -0.65186 |
| C             | -1.02764 | -0.68604 | -0.82804 |
| C             | -0.34764 | 0.34406  | -0.13317 |
| C             | 1.124355 | 0.481779 | -0.36184 |
| C             | 2.072009 | -0.50178 | 0.00792  |
| C             | 3.448955 | -0.38524 | -0.35545 |
| C             | 3.889563 | 0.737597 | -1.07379 |
| C             | 2.97287  | 1.724168 | -1.40247 |
| C             | 1.616908 | 1.593545 | -1.05296 |
| N             | 1.942732 | -1.67332 | 0.74703  |
| C             | 3.187581 | -2.27527 | 0.830024 |
| C             | 4.126286 | -1.53302 | 0.170563 |
| O             | -4.42369 | -0.30503 | 0.205806 |
| C             | -4.56112 | -1.3085  | -0.80738 |
| O             | -3.24802 | -1.73098 | -1.19413 |
| C             | 0.770259 | -2.17565 | 1.443477 |
| H             | -0.48802 | -1.35242 | -1.49235 |
| H             | -5.11248 | -2.16124 | -0.40182 |
| H             | -5.07993 | -0.88227 | -1.67771 |
| H             | 0.917849 | 2.37758  | -1.32327 |
| H             | 3.294935 | 2.607389 | -1.9472  |
| H             | 4.935704 | 0.831107 | -1.35426 |
| H             | 3.292952 | -3.20343 | 1.375903 |
| H             | 5.178658 | -1.76465 | 0.080455 |
| H             | 1.094913 | -2.94496 | 2.148454 |
| H             | 0.037604 | -2.61263 | 0.757249 |
| H             | 0.280436 | -1.37472 | 2.003326 |
| H             | 0.642372 | 2.173065 | 1.626828 |
| H             | -0.92016 | 2.577914 | 2.36455  |
| O             | -0.38638 | 3.577879 | 0.612583 |
| H             | -1.29687 | 3.734866 | 0.315488 |
| H             | -3.02027 | 1.720946 | 1.538067 |



### Vibrational frequencies of narcipavline 1-TS1:

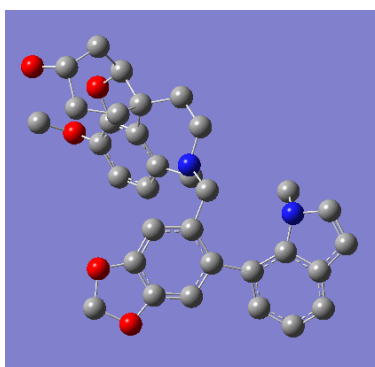

|    |        |    |        |     |         |     |         |     |         |     |         |
|----|--------|----|--------|-----|---------|-----|---------|-----|---------|-----|---------|
| 1  | -19.26 | 37 | 383.53 | 73  | 795.19  | 109 | 1122.08 | 145 | 1381.98 | 181 | 1669.53 |
| 2  | 18.83  | 38 | 391.50 | 74  | 811.82  | 110 | 1133.55 | 146 | 1386.72 | 182 | 1684.23 |
| 3  | 21.97  | 39 | 397.14 | 75  | 816.10  | 111 | 1140.10 | 147 | 1394.45 | 183 | 2911.44 |
| 4  | 36.92  | 40 | 409.69 | 76  | 822.00  | 112 | 1152.41 | 148 | 1397.17 | 184 | 2917.23 |
| 5  | 53.05  | 41 | 421.77 | 77  | 824.81  | 113 | 1155.78 | 149 | 1403.13 | 185 | 2972.23 |
| 6  | 54.62  | 42 | 434.22 | 78  | 858.29  | 114 | 1160.26 | 150 | 1405.75 | 186 | 3009.35 |
| 7  | 58.24  | 43 | 445.46 | 79  | 862.02  | 115 | 1160.62 | 151 | 1412.67 | 187 | 3011.46 |
| 8  | 64.36  | 44 | 455.96 | 80  | 877.29  | 116 | 1173.39 | 152 | 1419.68 | 188 | 3022.13 |
| 9  | 81.57  | 45 | 480.87 | 81  | 880.50  | 117 | 1176.82 | 153 | 1425.05 | 189 | 3027.41 |
| 10 | 91.21  | 46 | 502.22 | 82  | 886.75  | 118 | 1182.35 | 154 | 1436.64 | 190 | 3032.14 |
| 11 | 106.71 | 47 | 511.21 | 83  | 889.50  | 119 | 1185.56 | 155 | 1450.54 | 191 | 3034.23 |
| 12 | 112.23 | 48 | 517.38 | 84  | 910.40  | 120 | 1188.08 | 156 | 1451.64 | 192 | 3038.30 |
| 13 | 118.42 | 49 | 533.07 | 85  | 912.43  | 121 | 1200.83 | 157 | 1453.92 | 193 | 3043.78 |
| 14 | 128.74 | 50 | 537.87 | 86  | 926.86  | 122 | 1203.68 | 158 | 1473.22 | 194 | 3052.46 |
| 15 | 140.85 | 51 | 558.89 | 87  | 932.05  | 123 | 1214.33 | 159 | 1479.19 | 195 | 3068.60 |
| 16 | 159.18 | 52 | 571.72 | 88  | 937.79  | 124 | 1228.52 | 160 | 1497.45 | 196 | 3076.24 |
| 17 | 165.03 | 53 | 580.58 | 89  | 956.71  | 125 | 1238.62 | 161 | 1498.28 | 197 | 3079.66 |
| 18 | 167.83 | 54 | 591.41 | 90  | 962.78  | 126 | 1242.13 | 162 | 1511.21 | 198 | 3094.44 |
| 19 | 185.37 | 55 | 597.05 | 91  | 968.46  | 127 | 1247.22 | 163 | 1516.40 | 199 | 3110.85 |
| 20 | 194.28 | 56 | 605.23 | 92  | 979.26  | 128 | 1251.84 | 164 | 1518.20 | 200 | 3113.79 |
| 21 | 211.90 | 57 | 615.17 | 93  | 980.74  | 129 | 1260.84 | 165 | 1520.37 | 201 | 3115.62 |
| 22 | 215.00 | 58 | 624.58 | 94  | 987.25  | 130 | 1266.05 | 166 | 1521.86 | 202 | 3116.76 |
| 23 | 224.79 | 59 | 640.40 | 95  | 1003.12 | 131 | 1268.42 | 167 | 1526.76 | 203 | 3138.28 |
| 24 | 248.58 | 60 | 647.96 | 96  | 1005.95 | 132 | 1282.78 | 168 | 1529.70 | 204 | 3155.64 |
| 25 | 252.97 | 61 | 662.76 | 97  | 1008.40 | 133 | 1287.36 | 169 | 1533.46 | 205 | 3177.90 |
| 26 | 261.41 | 62 | 677.91 | 98  | 1023.94 | 134 | 1291.48 | 170 | 1542.35 | 206 | 3187.64 |
| 27 | 270.31 | 63 | 688.05 | 99  | 1044.92 | 135 | 1294.82 | 171 | 1542.65 | 207 | 3201.78 |
| 28 | 276.50 | 64 | 721.01 | 100 | 1050.95 | 136 | 1305.96 | 172 | 1545.65 | 208 | 3204.66 |
| 29 | 296.78 | 65 | 730.72 | 101 | 1061.24 | 137 | 1315.42 | 173 | 1552.27 | 209 | 3209.27 |
| 30 | 300.96 | 66 | 736.07 | 102 | 1069.23 | 138 | 1316.95 | 174 | 1574.40 | 210 | 3214.96 |
| 31 | 307.62 | 67 | 739.04 | 103 | 1076.78 | 139 | 1343.21 | 175 | 1576.24 | 211 | 3225.45 |
| 32 | 321.65 | 68 | 753.38 | 104 | 1091.36 | 140 | 1346.75 | 176 | 1586.61 | 212 | 3235.78 |
| 33 | 333.24 | 69 | 765.98 | 105 | 1096.04 | 141 | 1354.21 | 177 | 1630.19 | 213 | 3242.82 |

|    |        |    |        |     |         |     |         |     |         |     |         |
|----|--------|----|--------|-----|---------|-----|---------|-----|---------|-----|---------|
| 34 | 341.69 | 70 | 772.58 | 106 | 1101.58 | 142 | 1354.75 | 178 | 1637.67 | 214 | 3264.14 |
| 35 | 357.00 | 71 | 775.59 | 107 | 1109.18 | 143 | 1362.47 | 179 | 1638.86 | 215 | 3270.96 |
| 36 | 359.98 | 72 | 778.45 | 108 | 1113.98 | 144 | 1381.12 | 180 | 1667.79 | 216 | 3735.97 |

**Vibrational frequencies of 1-TS2:**

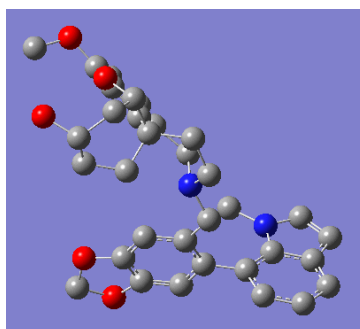

|    |        |    |        |     |         |     |         |     |         |     |         |
|----|--------|----|--------|-----|---------|-----|---------|-----|---------|-----|---------|
| 1  | -      | 37 | 366.59 | 73  | 785.46  | 109 | 1128.25 | 145 | 1387.52 | 181 | 1667.82 |
|    | 332.27 |    |        |     |         |     |         |     |         |     |         |
| 2  | 10.23  | 38 | 389.92 | 74  | 813.71  | 110 | 1137.16 | 146 | 1393.74 | 182 | 1669.81 |
| 3  | 17.06  | 39 | 392.95 | 75  | 816.74  | 111 | 1152.82 | 147 | 1397.07 | 183 | 2915.22 |
| 4  | 23.03  | 40 | 403.99 | 76  | 822.36  | 112 | 1155.68 | 148 | 1399.89 | 184 | 2926.96 |
| 5  | 24.45  | 41 | 429.03 | 77  | 826.14  | 113 | 1156.19 | 149 | 1408.69 | 185 | 2974.28 |
| 6  | 39.98  | 42 | 435.96 | 78  | 845.13  | 114 | 1157.70 | 150 | 1416.63 | 186 | 2993.45 |
| 7  | 54.88  | 43 | 456.46 | 79  | 856.17  | 115 | 1165.88 | 151 | 1418.95 | 187 | 3012.03 |
| 8  | 56.91  | 44 | 460.08 | 80  | 868.51  | 116 | 1180.59 | 152 | 1422.13 | 188 | 3016.47 |
| 9  | 62.66  | 45 | 474.48 | 81  | 880.77  | 117 | 1184.22 | 153 | 1436.68 | 189 | 3024.82 |
| 10 | 70.94  | 46 | 509.53 | 82  | 882.12  | 118 | 1187.85 | 154 | 1442.92 | 190 | 3029.65 |
| 11 | 85.13  | 47 | 511.78 | 83  | 897.78  | 119 | 1192.12 | 155 | 1453.78 | 191 | 3034.51 |
| 12 | 89.96  | 48 | 518.42 | 84  | 903.16  | 120 | 1206.67 | 156 | 1459.91 | 192 | 3041.79 |
| 13 | 95.93  | 49 | 538.53 | 85  | 912.73  | 121 | 1207.29 | 157 | 1468.51 | 193 | 3046.04 |
| 14 | 112.36 | 50 | 541.91 | 86  | 926.30  | 122 | 1215.04 | 158 | 1473.31 | 194 | 3060.79 |
| 15 | 118.73 | 51 | 560.33 | 87  | 930.84  | 123 | 1232.97 | 159 | 1497.77 | 195 | 3066.93 |
| 16 | 128.21 | 52 | 570.18 | 88  | 936.86  | 124 | 1235.69 | 160 | 1497.90 | 196 | 3067.55 |
| 17 | 151.03 | 53 | 575.21 | 89  | 950.53  | 125 | 1241.28 | 161 | 1508.55 | 197 | 3074.30 |
| 18 | 157.42 | 54 | 582.17 | 90  | 954.78  | 126 | 1242.67 | 162 | 1509.24 | 198 | 3080.75 |
| 19 | 167.19 | 55 | 588.25 | 91  | 963.78  | 127 | 1248.62 | 163 | 1510.50 | 199 | 3092.79 |
| 20 | 179.04 | 56 | 595.30 | 92  | 973.81  | 128 | 1256.78 | 164 | 1514.64 | 200 | 3111.22 |
| 21 | 194.31 | 57 | 608.40 | 93  | 976.91  | 129 | 1263.26 | 165 | 1520.97 | 201 | 3112.31 |
| 22 | 213.66 | 58 | 625.10 | 94  | 990.26  | 130 | 1273.70 | 166 | 1521.48 | 202 | 3116.83 |
| 23 | 221.39 | 59 | 640.84 | 95  | 1007.12 | 131 | 1283.59 | 167 | 1528.04 | 203 | 3131.67 |
| 24 | 223.80 | 60 | 650.23 | 96  | 1011.95 | 132 | 1289.83 | 168 | 1529.49 | 204 | 3136.69 |
| 25 | 227.78 | 61 | 674.94 | 97  | 1032.78 | 133 | 1293.30 | 169 | 1532.21 | 205 | 3151.30 |
| 26 | 234.88 | 62 | 676.89 | 98  | 1033.24 | 134 | 1306.06 | 170 | 1538.67 | 206 | 3153.57 |
| 27 | 255.25 | 63 | 700.10 | 99  | 1049.44 | 135 | 1315.39 | 171 | 1539.56 | 207 | 3177.43 |
| 28 | 262.65 | 64 | 723.44 | 100 | 1059.16 | 136 | 1325.19 | 172 | 1541.40 | 208 | 3178.95 |
| 29 | 272.12 | 65 | 727.37 | 101 | 1061.66 | 137 | 1343.82 | 173 | 1543.38 | 209 | 3189.11 |
| 30 | 281.59 | 66 | 728.15 | 102 | 1072.39 | 138 | 1343.97 | 174 | 1552.28 | 210 | 3203.85 |

|    |        |    |        |     |         |     |         |     |         |     |         |
|----|--------|----|--------|-----|---------|-----|---------|-----|---------|-----|---------|
| 31 | 290.52 | 67 | 730.22 | 103 | 1073.25 | 139 | 1348.85 | 175 | 1574.82 | 211 | 3209.92 |
| 32 | 315.35 | 68 | 737.71 | 104 | 1087.92 | 140 | 1356.81 | 176 | 1577.56 | 212 | 3221.12 |
| 33 | 316.19 | 69 | 740.91 | 105 | 1089.27 | 141 | 1358.66 | 177 | 1632.08 | 213 | 3241.64 |
| 34 | 321.28 | 70 | 764.19 | 106 | 1100.38 | 142 | 1367.90 | 178 | 1637.06 | 214 | 3252.88 |
| 35 | 344.76 | 71 | 775.10 | 107 | 1109.62 | 143 | 1379.58 | 179 | 1649.99 | 215 | 3272.26 |
| 36 | 348.16 | 72 | 777.93 | 108 | 1118.19 | 144 | 1382.72 | 180 | 1662.50 | 216 | 3776.47 |

**Vibrational frequencies of 2-TS1:**

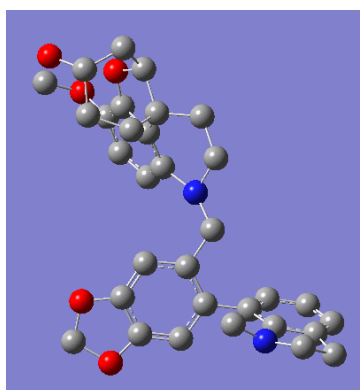

|    |        |    |        |     |         |     |         |     |         |     |         |
|----|--------|----|--------|-----|---------|-----|---------|-----|---------|-----|---------|
| 1  | -      | 38 | 365.30 | 75  | 816.24  | 112 | 1152.10 | 149 | 1394.00 | 186 | 1670.15 |
| 2  | 329.47 |    |        |     |         |     |         |     |         |     |         |
| 3  | 9.26   | 39 | 386.83 | 76  | 823.63  | 113 | 1153.59 | 150 | 1397.16 | 187 | 2914.29 |
| 4  | 16.95  | 40 | 393.17 | 77  | 836.86  | 114 | 1156.61 | 151 | 1400.08 | 188 | 2922.59 |
| 5  | 21.13  | 41 | 403.26 | 78  | 860.29  | 115 | 1166.43 | 152 | 1411.83 | 189 | 2956.02 |
| 6  | 25.43  | 42 | 428.57 | 79  | 869.95  | 116 | 1181.60 | 153 | 1417.40 | 190 | 2965.15 |
| 7  | 43.60  | 43 | 435.02 | 80  | 877.30  | 117 | 1184.35 | 154 | 1419.16 | 191 | 2992.08 |
| 8  | 52.85  | 44 | 452.38 | 81  | 881.97  | 118 | 1187.35 | 155 | 1422.14 | 192 | 2995.67 |
| 9  | 57.85  | 45 | 459.36 | 82  | 888.25  | 119 | 1192.08 | 156 | 1437.72 | 193 | 3011.98 |
| 10 | 62.75  | 46 | 469.46 | 83  | 908.77  | 120 | 1195.60 | 157 | 1443.08 | 194 | 3015.50 |
| 11 | 69.43  | 47 | 488.23 | 84  | 912.29  | 121 | 1205.20 | 158 | 1453.91 | 195 | 3028.17 |
| 12 | 77.23  | 48 | 511.89 | 85  | 916.12  | 122 | 1206.58 | 159 | 1461.23 | 196 | 3029.01 |
| 13 | 89.92  | 49 | 521.44 | 86  | 929.07  | 123 | 1212.58 | 160 | 1466.48 | 197 | 3030.76 |
| 14 | 102.39 | 50 | 538.00 | 87  | 934.69  | 124 | 1228.15 | 161 | 1474.06 | 198 | 3032.58 |
| 15 | 107.81 | 51 | 540.65 | 88  | 947.72  | 125 | 1231.79 | 162 | 1495.14 | 199 | 3033.87 |
| 16 | 117.48 | 52 | 561.76 | 89  | 950.67  | 126 | 1235.11 | 163 | 1497.80 | 200 | 3041.15 |
| 17 | 139.91 | 53 | 566.40 | 90  | 963.66  | 127 | 1236.64 | 164 | 1508.56 | 201 | 3056.84 |
| 18 | 146.76 | 54 | 569.95 | 91  | 974.34  | 128 | 1241.42 | 165 | 1511.15 | 202 | 3067.06 |
| 19 | 158.28 | 55 | 579.98 | 92  | 977.27  | 129 | 1243.69 | 166 | 1513.44 | 203 | 3073.81 |
| 20 | 167.11 | 56 | 580.35 | 93  | 978.76  | 130 | 1257.03 | 167 | 1516.97 | 204 | 3079.06 |
| 21 | 181.06 | 57 | 591.07 | 94  | 990.52  | 131 | 1263.06 | 168 | 1519.10 | 205 | 3089.30 |
| 22 | 187.28 | 58 | 608.58 | 95  | 1007.54 | 132 | 1268.19 | 169 | 1520.97 | 206 | 3093.59 |
| 23 | 204.51 | 59 | 626.50 | 96  | 1012.42 | 133 | 1278.64 | 170 | 1523.21 | 207 | 3097.31 |
| 24 | 207.42 | 60 | 639.88 | 97  | 1019.29 | 134 | 1287.12 | 171 | 1525.71 | 208 | 3101.39 |
| 25 | 221.71 | 61 | 649.08 | 98  | 1029.69 | 135 | 1289.74 | 172 | 1527.41 | 209 | 3110.62 |
| 26 | 230.25 | 62 | 665.16 | 99  | 1044.63 | 136 | 1290.72 | 173 | 1531.65 | 210 | 3111.37 |
| 27 | 239.83 | 63 | 683.14 | 100 | 1052.58 | 137 | 1305.55 | 174 | 1532.71 | 211 | 3111.96 |

|    |        |    |        |     |         |     |         |     |         |     |         |
|----|--------|----|--------|-----|---------|-----|---------|-----|---------|-----|---------|
| 27 | 246.77 | 64 | 692.86 | 101 | 1061.65 | 138 | 1307.88 | 175 | 1535.12 | 212 | 3136.87 |
| 28 | 264.42 | 65 | 727.23 | 102 | 1071.28 | 139 | 1315.18 | 176 | 1539.66 | 213 | 3152.84 |
| 29 | 265.01 | 66 | 731.52 | 103 | 1073.62 | 140 | 1324.72 | 177 | 1543.17 | 214 | 3177.74 |
| 30 | 278.82 | 67 | 735.15 | 104 | 1085.02 | 141 | 1330.28 | 178 | 1552.35 | 215 | 3178.83 |
| 31 | 289.46 | 68 | 740.77 | 105 | 1088.85 | 142 | 1343.56 | 179 | 1552.40 | 216 | 3179.91 |
| 32 | 295.09 | 69 | 755.22 | 106 | 1089.62 | 143 | 1348.28 | 180 | 1575.75 | 217 | 3184.42 |
| 33 | 317.15 | 70 | 773.95 | 107 | 1100.65 | 144 | 1356.66 | 181 | 1635.55 | 218 | 3206.32 |
| 34 | 323.18 | 71 | 775.25 | 108 | 1109.53 | 145 | 1365.12 | 182 | 1637.50 | 219 | 3209.58 |
| 35 | 341.39 | 72 | 777.51 | 109 | 1122.78 | 146 | 1368.29 | 183 | 1659.92 | 220 | 3225.82 |
| 36 | 343.90 | 73 | 792.49 | 110 | 1134.92 | 147 | 1382.98 | 184 | 1663.92 | 221 | 3238.33 |
| 37 | 352.02 | 74 | 795.24 | 111 | 1141.32 | 148 | 1391.53 | 185 | 1668.95 | 222 | 3776.13 |

### Vibrational frequencies of 2-TS2:

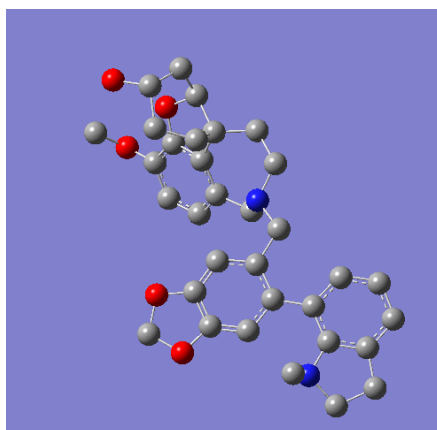

|    |        |    |        |    |        |     |         |     |         |     |         |
|----|--------|----|--------|----|--------|-----|---------|-----|---------|-----|---------|
| 1  | -23.71 | 38 | 387.65 | 75 | 816.91 | 112 | 1152.81 | 149 | 1382.86 | 186 | 1679.21 |
| 2  | 17.73  | 39 | 397.52 | 76 | 822.80 | 113 | 1156.28 | 150 | 1394.25 | 187 | 2916.11 |
| 3  | 21.67  | 40 | 398.44 | 77 | 834.78 | 114 | 1159.11 | 151 | 1396.99 | 188 | 2919.58 |
| 4  | 33.82  | 41 | 404.71 | 78 | 857.99 | 115 | 1162.70 | 152 | 1399.89 | 189 | 2972.10 |
| 5  | 52.41  | 42 | 415.46 | 79 | 865.71 | 116 | 1167.79 | 153 | 1404.07 | 190 | 2972.40 |
| 6  | 53.96  | 43 | 436.18 | 80 | 880.08 | 117 | 1175.50 | 154 | 1419.25 | 191 | 2994.28 |
| 7  | 63.29  | 44 | 450.10 | 81 | 890.59 | 118 | 1182.76 | 155 | 1420.96 | 192 | 3009.50 |
| 8  | 76.42  | 45 | 455.93 | 82 | 904.96 | 119 | 1185.52 | 156 | 1430.72 | 193 | 3010.27 |
| 9  | 78.66  | 46 | 467.37 | 83 | 911.90 | 120 | 1187.76 | 157 | 1448.93 | 194 | 3026.17 |
| 10 | 93.02  | 47 | 500.91 | 84 | 914.62 | 121 | 1202.83 | 158 | 1451.00 | 195 | 3029.09 |
| 11 | 108.57 | 48 | 515.84 | 85 | 928.39 | 122 | 1209.56 | 159 | 1453.27 | 196 | 3034.64 |
| 12 | 114.14 | 49 | 530.87 | 86 | 935.85 | 123 | 1212.50 | 160 | 1468.11 | 197 | 3034.99 |
| 13 | 117.89 | 50 | 537.39 | 87 | 951.26 | 124 | 1217.24 | 161 | 1474.26 | 198 | 3044.14 |
| 14 | 129.39 | 51 | 545.85 | 88 | 955.35 | 125 | 1231.66 | 162 | 1482.46 | 199 | 3047.26 |
| 15 | 139.09 | 52 | 549.63 | 89 | 957.21 | 126 | 1234.81 | 163 | 1497.71 | 200 | 3057.12 |
| 16 | 146.47 | 53 | 566.20 | 90 | 968.53 | 127 | 1239.05 | 164 | 1498.58 | 201 | 3060.89 |
| 17 | 163.28 | 54 | 573.64 | 91 | 971.78 | 128 | 1246.00 | 165 | 1512.50 | 202 | 3069.21 |
| 18 | 168.13 | 55 | 575.61 | 92 | 980.64 | 129 | 1250.32 | 166 | 1512.92 | 203 | 3079.30 |
| 19 | 182.92 | 56 | 584.62 | 93 | 982.32 | 130 | 1253.03 | 167 | 1516.62 | 204 | 3081.30 |

|    |        |    |        |     |         |     |         |     |         |     |         |
|----|--------|----|--------|-----|---------|-----|---------|-----|---------|-----|---------|
| 20 | 193.89 | 57 | 606.17 | 94  | 989.54  | 131 | 1263.03 | 168 | 1520.36 | 205 | 3094.04 |
| 21 | 207.91 | 58 | 612.22 | 95  | 992.06  | 132 | 1266.47 | 169 | 1520.71 | 206 | 3098.20 |
| 22 | 215.40 | 59 | 627.85 | 96  | 1005.04 | 133 | 1281.92 | 170 | 1524.17 | 207 | 3102.65 |
| 23 | 224.21 | 60 | 649.88 | 97  | 1015.75 | 134 | 1284.00 | 171 | 1527.44 | 208 | 3106.86 |
| 24 | 227.86 | 61 | 660.65 | 98  | 1024.94 | 135 | 1287.43 | 172 | 1530.87 | 209 | 3110.78 |
| 25 | 228.81 | 62 | 676.32 | 99  | 1042.21 | 136 | 1293.14 | 173 | 1532.17 | 210 | 3117.21 |
| 26 | 258.39 | 63 | 686.69 | 100 | 1048.19 | 137 | 1306.88 | 174 | 1534.00 | 211 | 3125.69 |
| 27 | 267.30 | 64 | 696.36 | 101 | 1056.22 | 138 | 1312.30 | 175 | 1536.67 | 212 | 3140.29 |
| 28 | 274.98 | 65 | 709.69 | 102 | 1062.01 | 139 | 1316.67 | 176 | 1542.68 | 213 | 3146.50 |
| 29 | 292.94 | 66 | 730.17 | 103 | 1072.44 | 140 | 1327.49 | 177 | 1544.41 | 214 | 3155.99 |
| 30 | 299.38 | 67 | 738.53 | 104 | 1076.73 | 141 | 1330.32 | 178 | 1550.48 | 215 | 3179.55 |
| 31 | 307.30 | 68 | 739.89 | 105 | 1096.68 | 142 | 1338.08 | 179 | 1552.87 | 216 | 3181.69 |
| 32 | 310.25 | 69 | 761.03 | 106 | 1099.72 | 143 | 1346.97 | 180 | 1577.17 | 217 | 3199.20 |
| 33 | 321.04 | 70 | 773.30 | 107 | 1101.29 | 144 | 1354.40 | 181 | 1624.03 | 218 | 3210.10 |
| 34 | 347.53 | 71 | 779.00 | 108 | 1113.05 | 145 | 1357.80 | 182 | 1637.32 | 219 | 3246.21 |
| 35 | 356.51 | 72 | 780.23 | 109 | 1114.37 | 146 | 1362.64 | 183 | 1646.89 | 220 | 3254.32 |
| 36 | 357.70 | 73 | 787.04 | 110 | 1123.15 | 147 | 1364.52 | 184 | 1664.64 | 221 | 3353.48 |
| 37 | 379.14 | 74 | 798.20 | 111 | 1135.37 | 148 | 1379.10 | 185 | 1669.68 | 222 | 3735.93 |

#### Vibrational frequencies of 7-TS1:

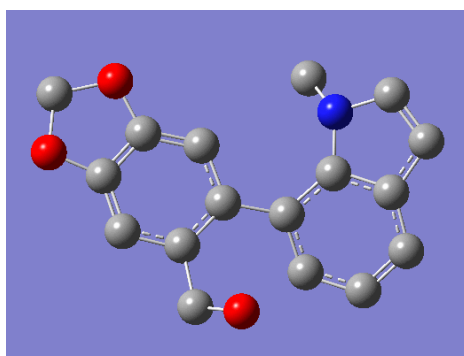

|    |        |    |        |    |         |    |         |    |         |    |         |
|----|--------|----|--------|----|---------|----|---------|----|---------|----|---------|
| 1  | -68.30 | 18 | 377.60 | 35 | 763.60  | 52 | 1098.67 | 69 | 1363.83 | 86 | 1665.62 |
| 2  | 49.01  | 19 | 382.88 | 36 | 770.63  | 53 | 1116.23 | 70 | 1391.67 | 87 | 1678.73 |
| 3  | 66.41  | 20 | 432.71 | 37 | 805.72  | 54 | 1122.31 | 71 | 1400.34 | 88 | 3009.31 |
| 4  | 73.24  | 21 | 469.77 | 38 | 818.17  | 55 | 1145.26 | 72 | 1422.49 | 89 | 3030.15 |
| 5  | 98.21  | 22 | 494.43 | 39 | 825.46  | 56 | 1152.19 | 73 | 1443.75 | 90 | 3053.03 |
| 6  | 104.55 | 23 | 539.07 | 40 | 860.06  | 57 | 1157.39 | 74 | 1449.74 | 91 | 3080.35 |
| 7  | 136.43 | 24 | 551.15 | 41 | 869.40  | 58 | 1182.91 | 75 | 1467.20 | 92 | 3110.23 |
| 8  | 181.88 | 25 | 586.15 | 42 | 877.00  | 59 | 1203.99 | 76 | 1487.80 | 93 | 3114.87 |
| 9  | 195.02 | 26 | 597.75 | 43 | 909.98  | 60 | 1213.32 | 77 | 1525.58 | 94 | 3172.82 |
| 10 | 220.68 | 27 | 621.74 | 44 | 919.34  | 61 | 1218.16 | 78 | 1535.21 | 95 | 3187.68 |
| 11 | 244.23 | 28 | 630.82 | 45 | 962.37  | 62 | 1227.76 | 79 | 1544.71 | 96 | 3205.53 |
| 12 | 254.15 | 29 | 676.47 | 46 | 968.16  | 63 | 1249.37 | 80 | 1552.40 | 97 | 3211.99 |
| 13 | 266.56 | 30 | 691.24 | 47 | 998.93  | 64 | 1279.79 | 81 | 1564.35 | 98 | 3246.38 |
| 14 | 277.73 | 31 | 724.62 | 48 | 1017.49 | 65 | 1285.56 | 82 | 1577.27 | 99 | 3267.98 |

|    |        |    |        |    |         |    |         |    |         |     |         |
|----|--------|----|--------|----|---------|----|---------|----|---------|-----|---------|
| 15 | 285.80 | 32 | 735.63 | 49 | 1041.71 | 66 | 1302.81 | 83 | 1580.96 | 100 | 3289.31 |
| 16 | 336.28 | 33 | 738.48 | 50 | 1071.56 | 67 | 1312.87 | 84 | 1631.29 | 101 | 3400.51 |
| 17 | 361.41 | 34 | 742.68 | 51 | 1091.54 | 68 | 1353.63 | 85 | 1646.52 | 102 | 3742.94 |

**Vibrational frequencies of 7-TS2:**

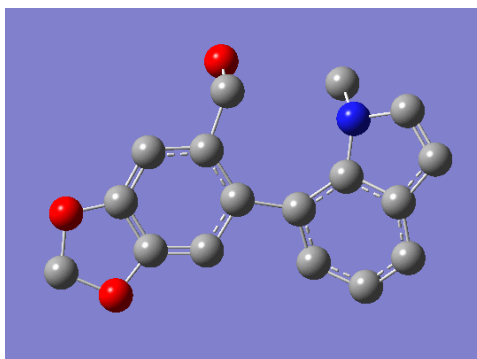

|    |        |    |        |    |         |    |         |    |         |     |         |
|----|--------|----|--------|----|---------|----|---------|----|---------|-----|---------|
| 1  | -38.07 | 18 | 387.56 | 35 | 773.64  | 55 | 1142.06 | 69 | 1365.37 | 86  | 1666.83 |
| 2  | 57.49  | 19 | 407.09 | 36 | 789.77  | 56 | 1151.32 | 70 | 1384.36 | 87  | 1682.30 |
| 3  | 72.09  | 20 | 452.01 | 37 | 812.09  | 57 | 1171.81 | 71 | 1397.98 | 88  | 3015.63 |
| 4  | 100.58 | 21 | 485.27 | 38 | 824.10  | 58 | 1176.75 | 72 | 1426.03 | 89  | 3034.69 |
| 5  | 122.49 | 22 | 505.61 | 39 | 862.16  | 59 | 1188.60 | 73 | 1437.33 | 90  | 3041.31 |
| 6  | 143.37 | 23 | 516.17 | 40 | 871.93  | 60 | 1199.03 | 74 | 1446.58 | 91  | 3116.18 |
| 7  | 156.75 | 24 | 569.66 | 41 | 882.67  | 61 | 1209.77 | 75 | 1452.95 | 92  | 3121.39 |
| 8  | 172.63 | 25 | 586.47 | 42 | 888.91  | 62 | 1218.50 | 76 | 1487.59 | 93  | 3187.18 |
| 9  | 184.79 | 26 | 600.69 | 43 | 908.01  | 63 | 1253.55 | 77 | 1519.05 | 94  | 3198.86 |
| 10 | 209.41 | 27 | 617.61 | 44 | 936.97  | 64 | 1265.06 | 78 | 1526.87 | 95  | 3204.48 |
| 11 | 241.51 | 28 | 644.97 | 45 | 964.76  | 65 | 1289.61 | 79 | 1549.91 | 96  | 3220.30 |
| 12 | 268.87 | 29 | 667.44 | 46 | 973.34  | 66 | 1298.54 | 80 | 1555.03 | 97  | 3224.84 |
| 13 | 283.48 | 30 | 687.45 | 47 | 997.38  | 67 | 1311.18 | 81 | 1576.78 | 98  | 3231.91 |
| 14 | 290.11 | 31 | 730.19 | 48 | 1010.14 | 68 | 1359.80 | 82 | 1582.92 | 99  | 3244.84 |
| 15 | 329.67 | 32 | 735.38 | 49 | 1025.55 | 55 | 1142.06 | 83 | 1583.27 | 100 | 3265.88 |
| 16 | 350.33 | 33 | 749.30 | 50 | 1050.52 | 56 | 1151.32 | 84 | 1630.59 | 101 | 3281.55 |
| 17 | 356.82 | 34 | 760.04 | 51 | 1077.25 | 57 | 1171.81 | 85 | 1639.53 | 102 | 3728.77 |

## Spectral Data

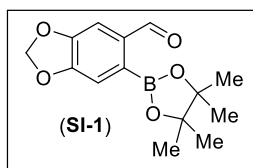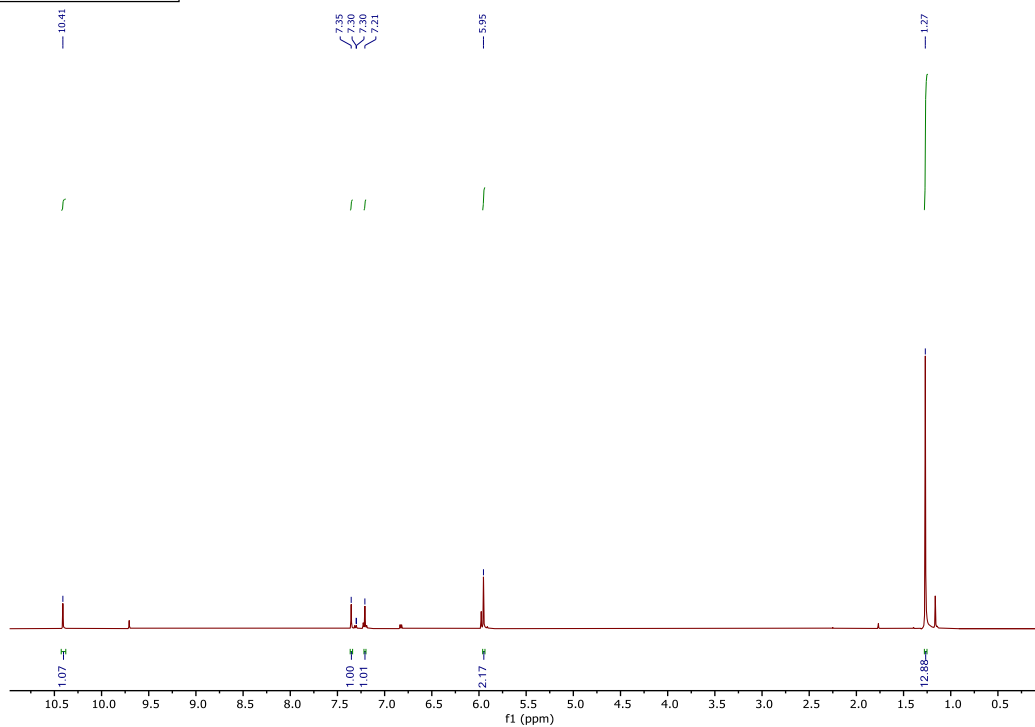

$^1\text{H}$  NMR (500 MHz,  $\text{CDCl}_3$ ) of SI-1

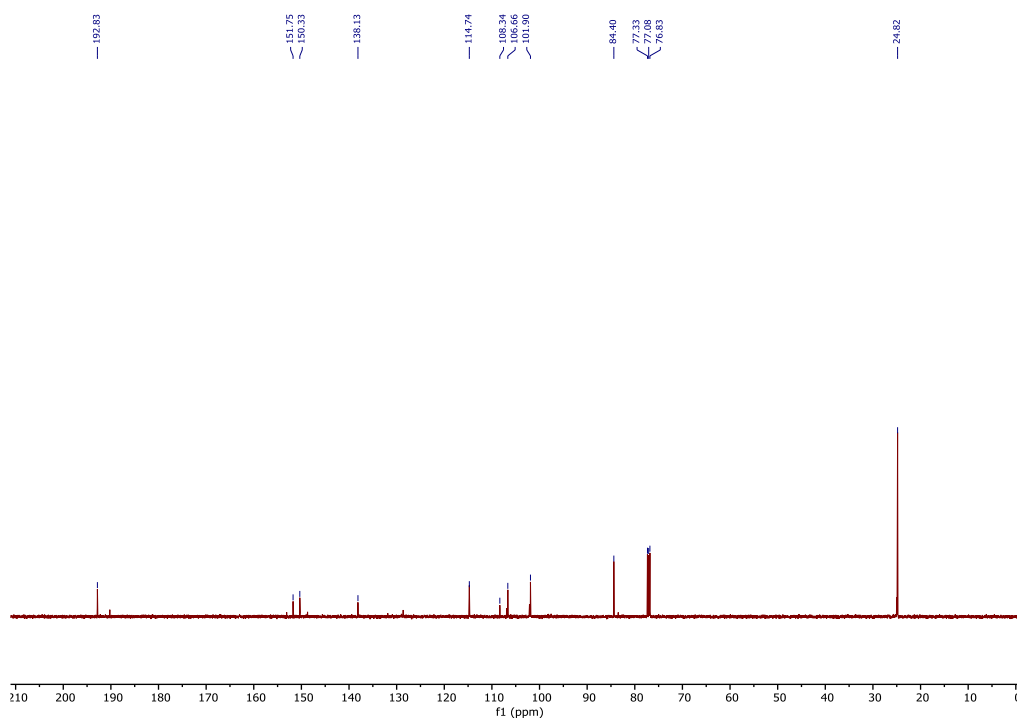

$^{13}\text{C}$  { $^1\text{H}$ } NMR (126 MHz,  $\text{CDCl}_3$ ) of SI-1

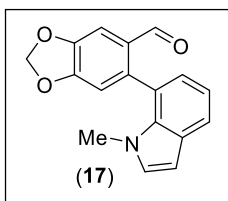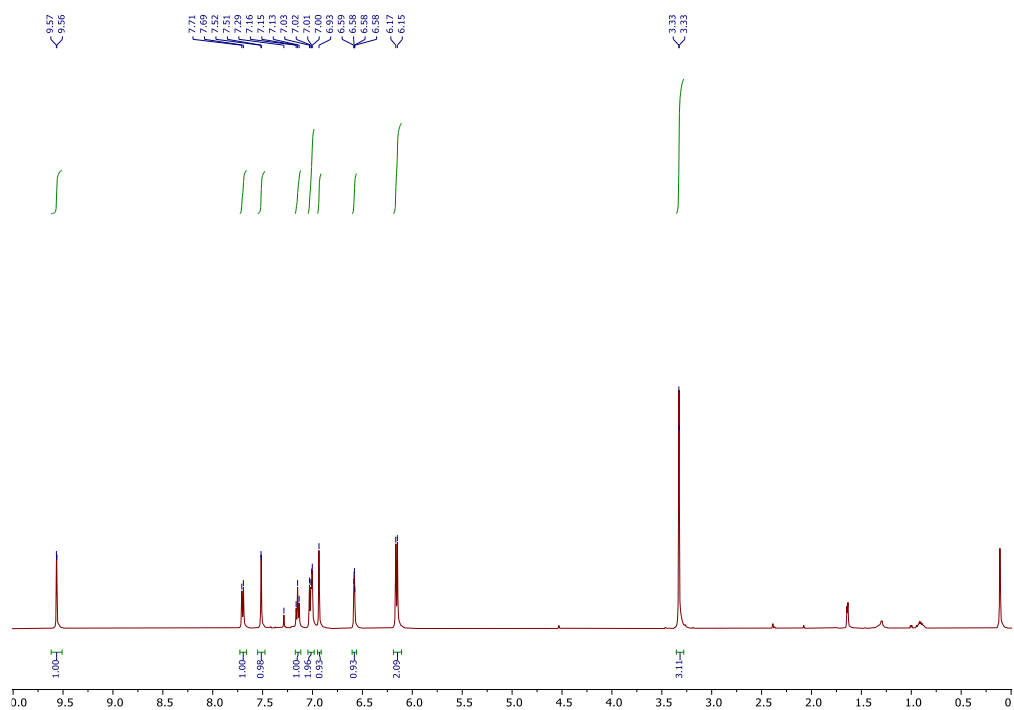

<sup>1</sup>H NMR (500 MHz, CDCl<sub>3</sub>) of **17**

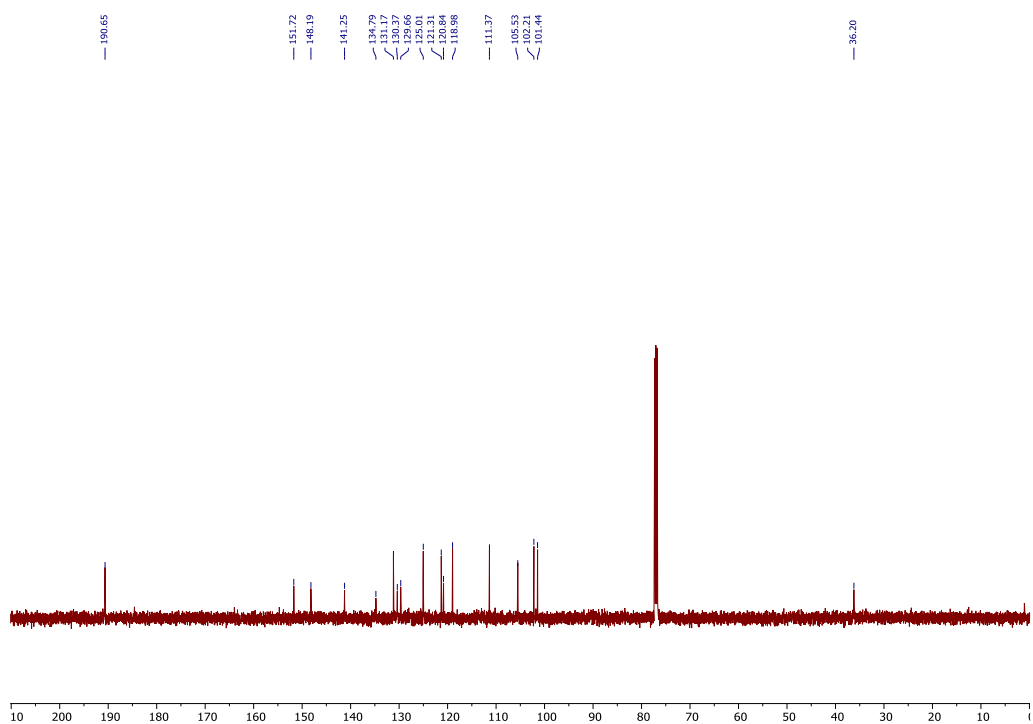

<sup>13</sup>C {<sup>1</sup>H} NMR (126 MHz, CDCl<sub>3</sub>) of **17**



AB09-Nov-2023 13:30:14

AB-AYA-02068P (0.172) Is (1.00,1.00) C<sub>17</sub>H<sub>14</sub>NO<sub>3</sub>

IISER - KOLKATA

1: TOF MS ES+  
8.22e12

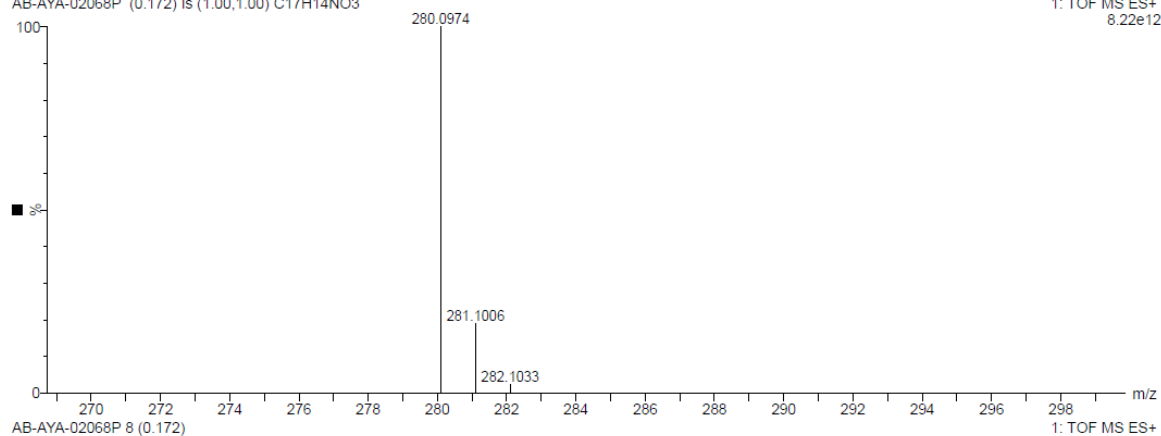

AB-AYA-02068P 8 (0.172)

1: TOF MS ES+  
4.79e5

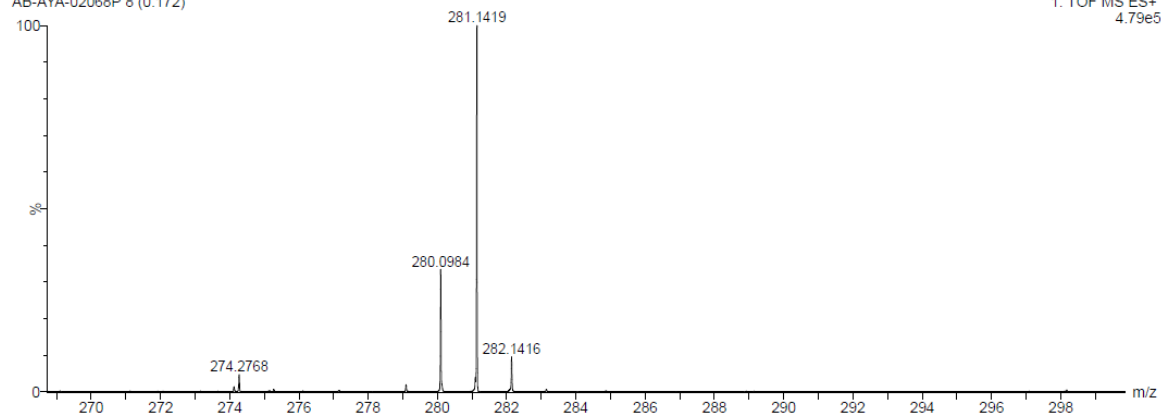

### HRMS data of 17

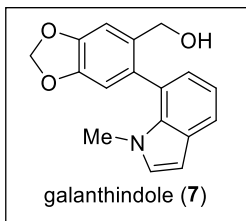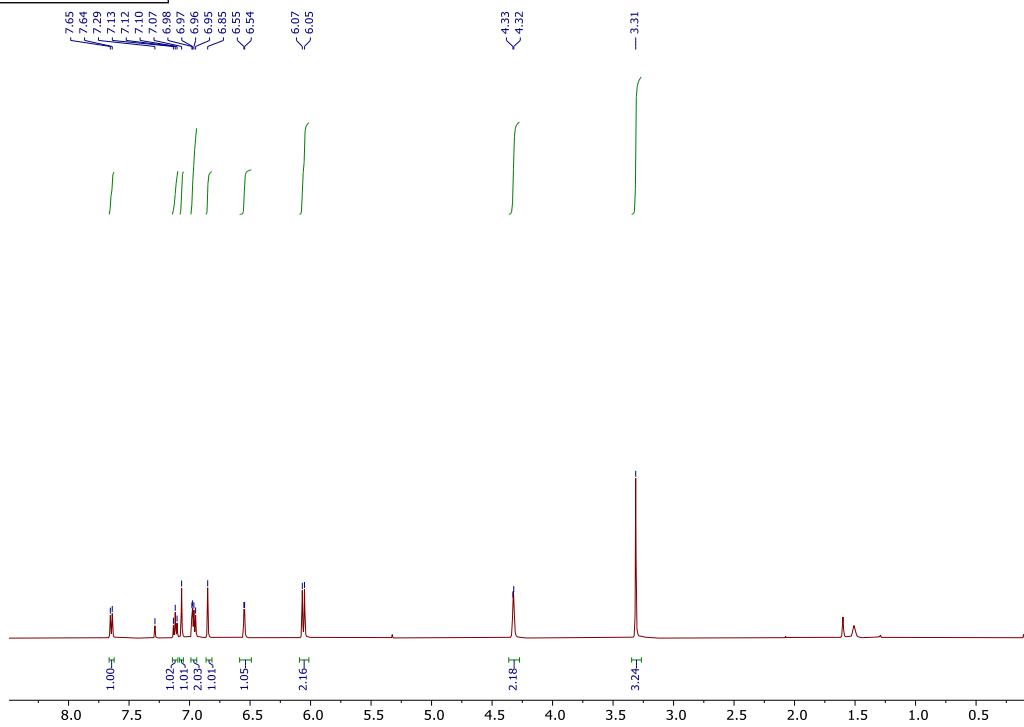

$^1\text{H}$  NMR (500 MHz,  $\text{CDCl}_3$ ) of **7**

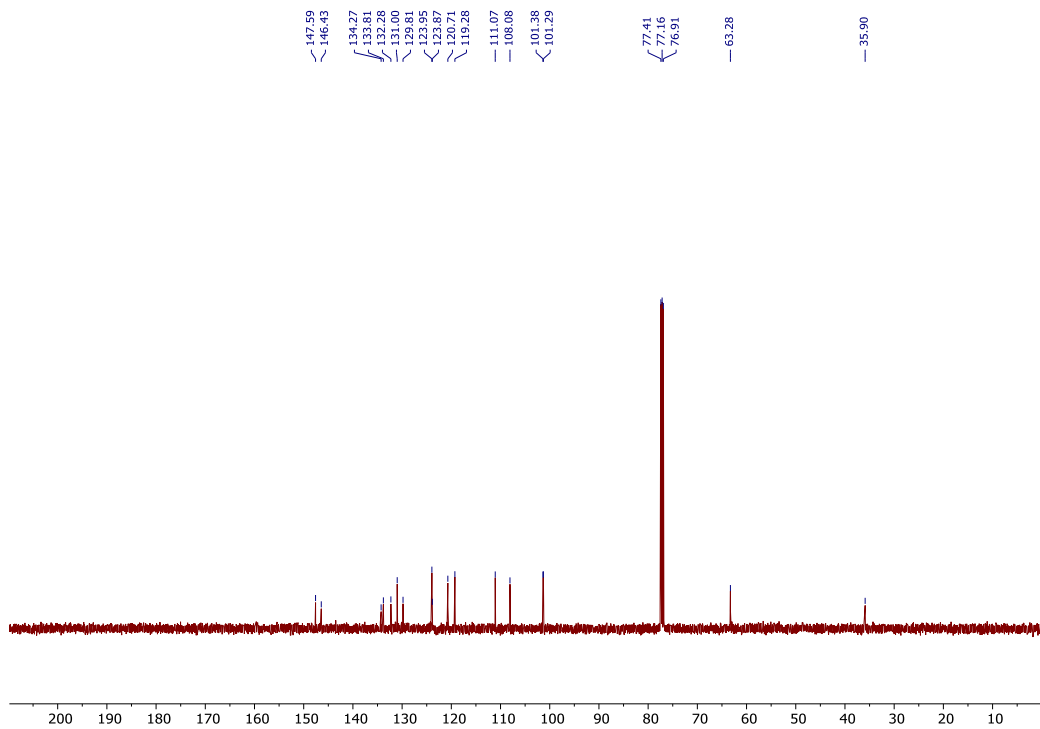

$^{13}\text{C}$  { $^1\text{H}$ } NMR (126 MHz,  $\text{CDCl}_3$ ) of **7**

AB07-Nov-2023 12:32:56

AB-SP-02GI (0.053) Is (1.00,1.00) C17H16NO3

IISER - KOLKATA

1: TOF MS ES+  
8.22e12

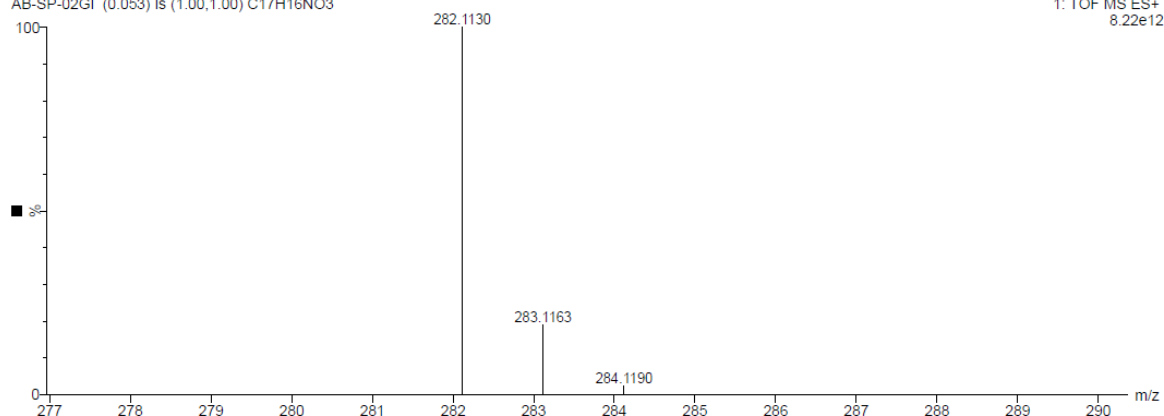

AB-SP-02GI 27 (0.552) AM2 (Ar,22000,0.556,28,0.00,LS 10); ABS

1: TOF MS ES+  
5.31e5

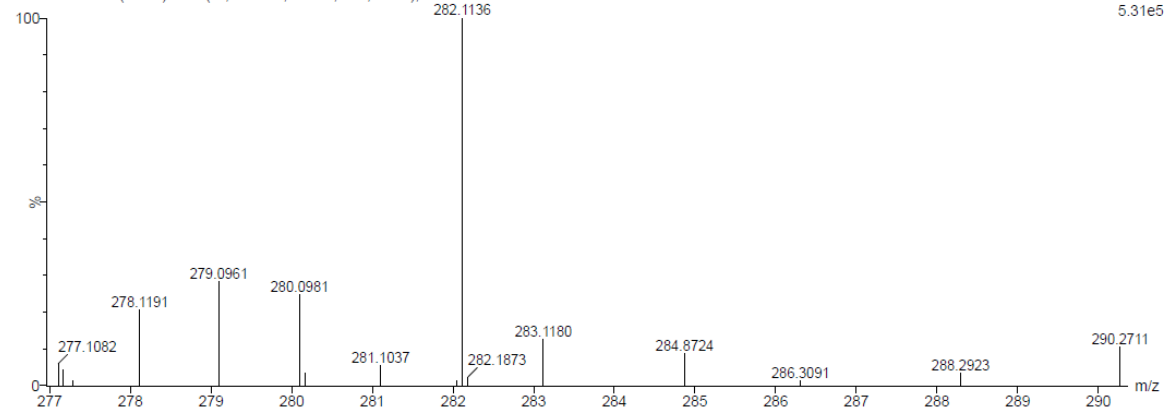

### HRMS data of 7

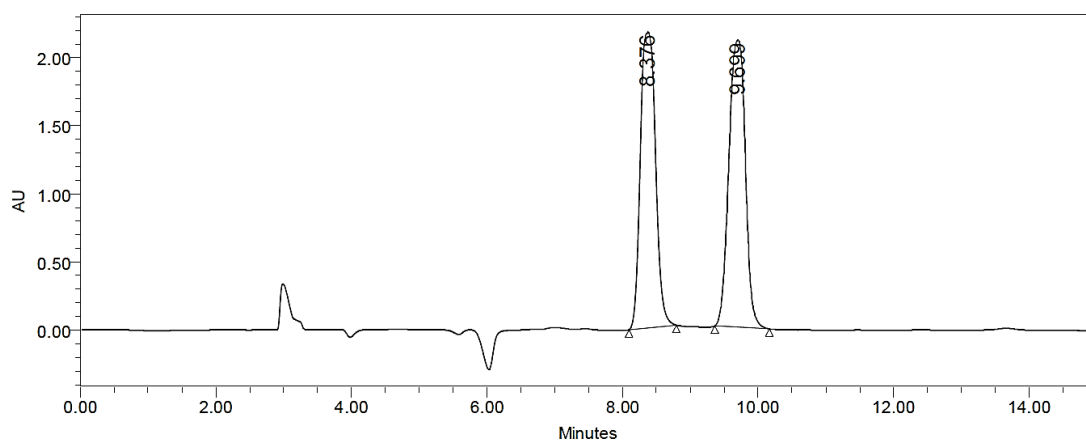

|   | RT    | Area     | % Area | Height  |
|---|-------|----------|--------|---------|
| 1 | 8.376 | 33742892 | 48.67  | 2174522 |
| 2 | 9.699 | 35588589 | 51.33  | 2109148 |

### HPLC data of (±)-7

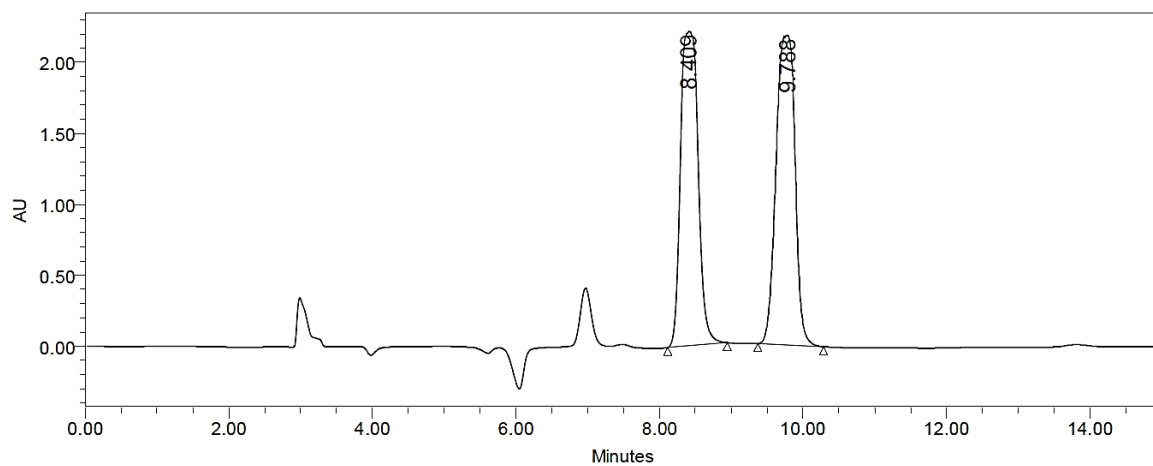

|   | RT    | Area     | % Area | Height  |
|---|-------|----------|--------|---------|
| 1 | 8.409 | 37786579 | 48.46  | 2218917 |
| 2 | 9.788 | 40194672 | 51.54  | 2183919 |

HPLC data of ( $\pm$ )-**7** for (*S*)-CBS at room temperature

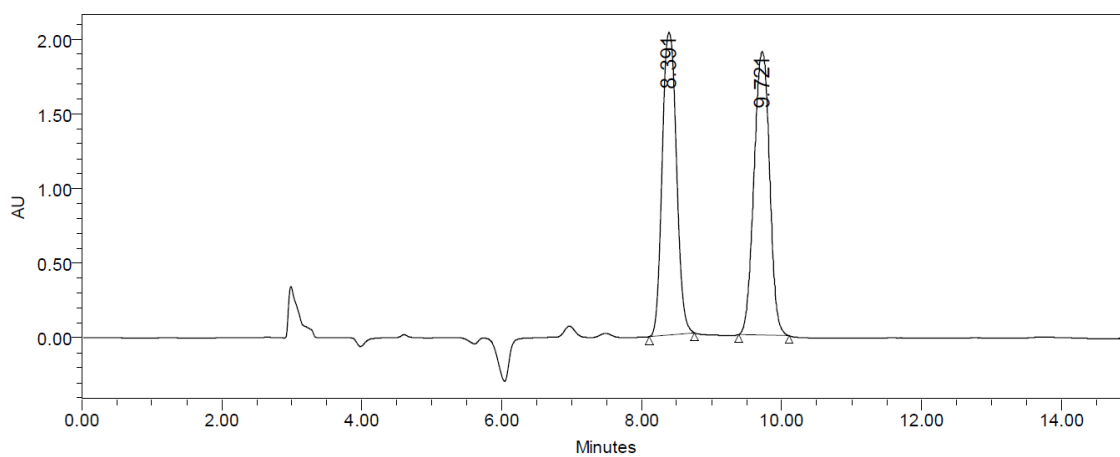

|   | RT    | Area     | % Area | Height  |
|---|-------|----------|--------|---------|
| 1 | 8.391 | 28658275 | 49.31  | 2026996 |
| 2 | 9.721 | 29460934 | 50.69  | 1898492 |

HPLC data of ( $\pm$ )-**7** for (*S*)-CBS at 0 °C

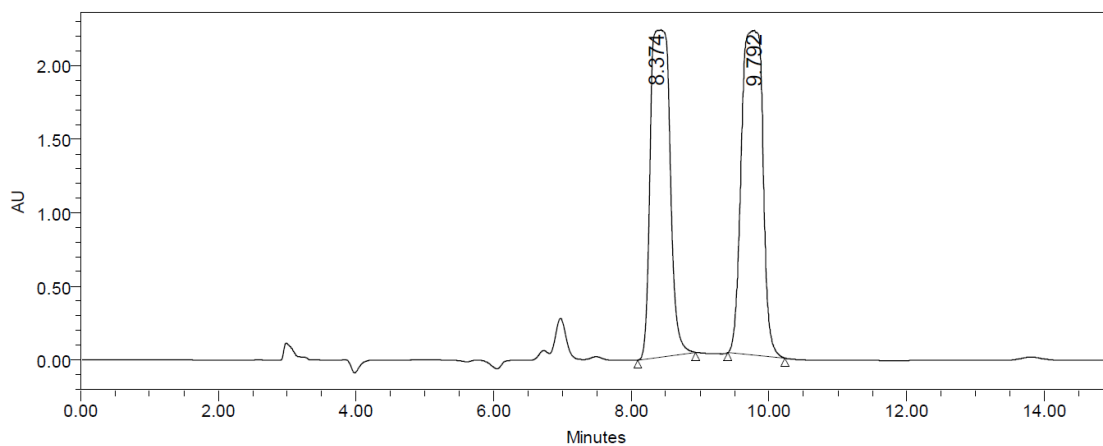

|   | RT    | Area     | % Area | Height  |
|---|-------|----------|--------|---------|
| 1 | 8.374 | 44078723 | 48.21  | 2225252 |
| 2 | 9.792 | 47357150 | 51.79  | 2207294 |

HPLC data of ( $\pm$ )-**7** for (*S*)-CBS at  $-78\text{ }^{\circ}\text{C}$

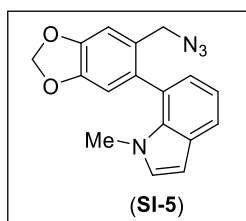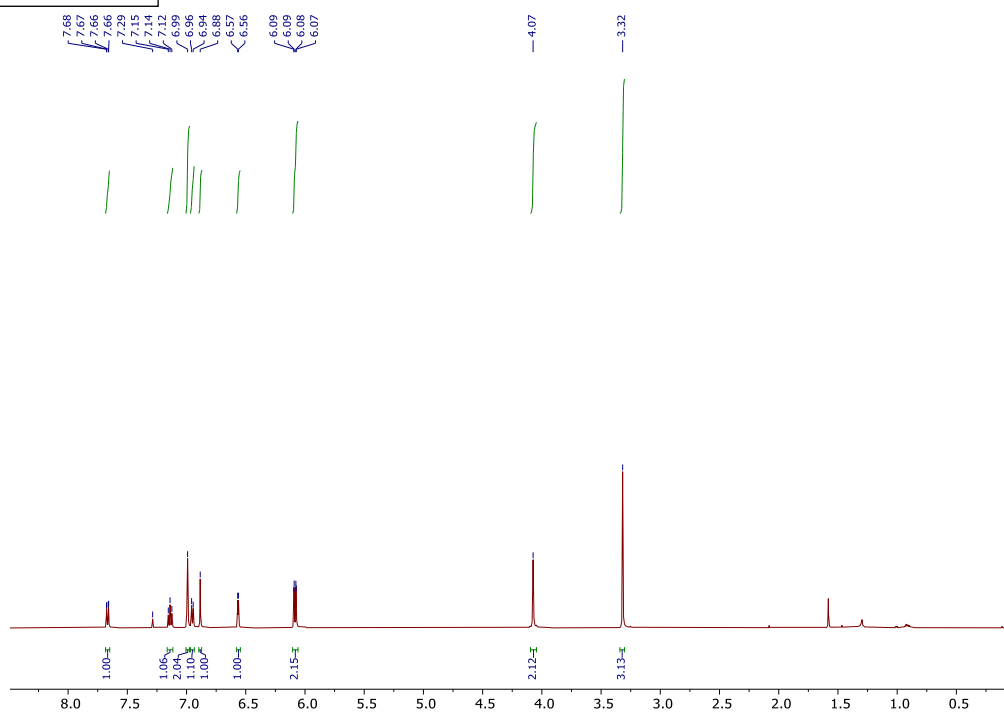

$^1\text{H}$  NMR (400 MHz,  $\text{CDCl}_3$ ) of compound **SI-5**

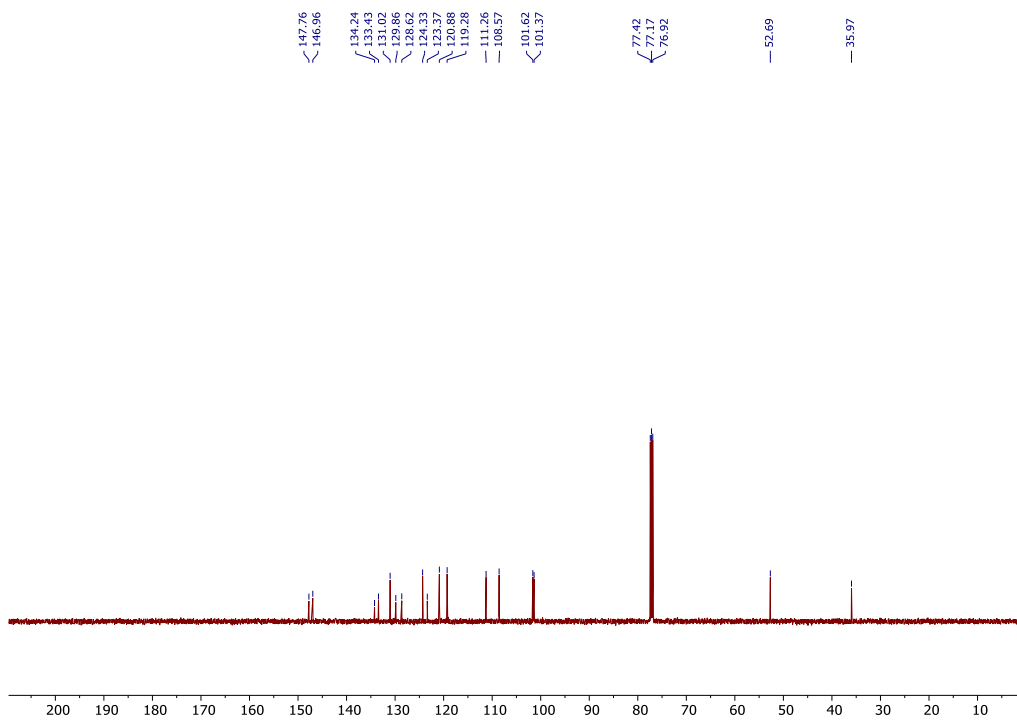

$^{13}\text{C}$   $\{^1\text{H}\}$  NMR (126 MHz,  $\text{CDCl}_3$ ) of **SI-5**

AB09-Nov-2023 13:35:07 IISER - KOLKATA 1: TOF MS ES+ 8.15e12  
 AB-AYA-02072P (0.138) Is (1.00,1.00) C17H15N4O2

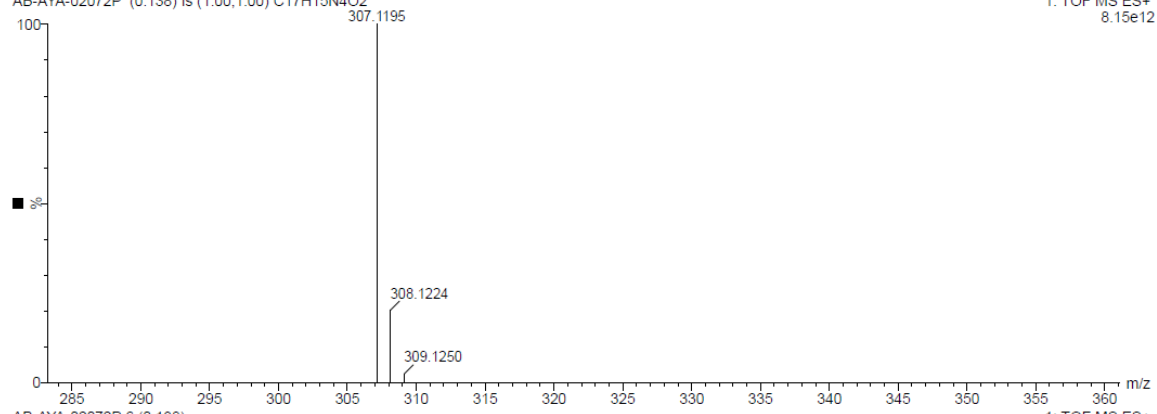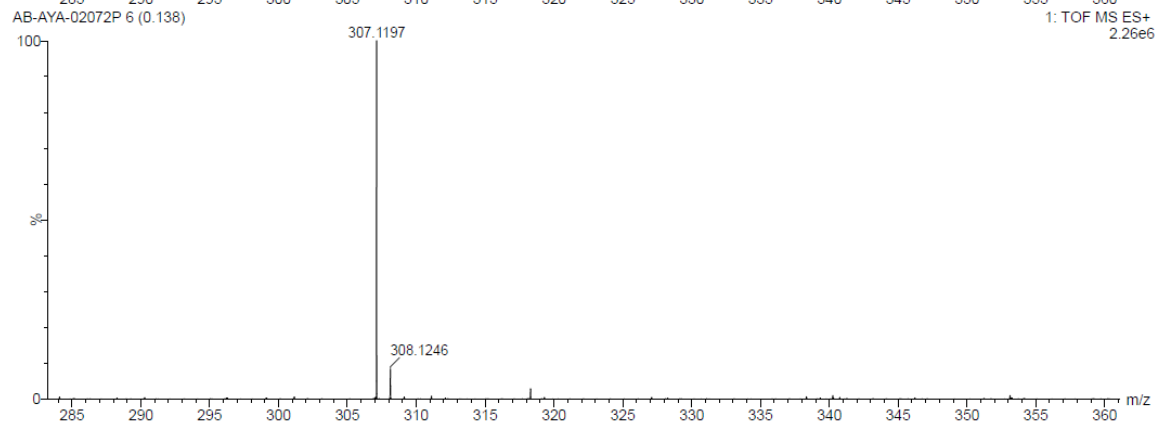

HRMS data of **SI-5**

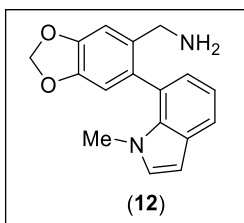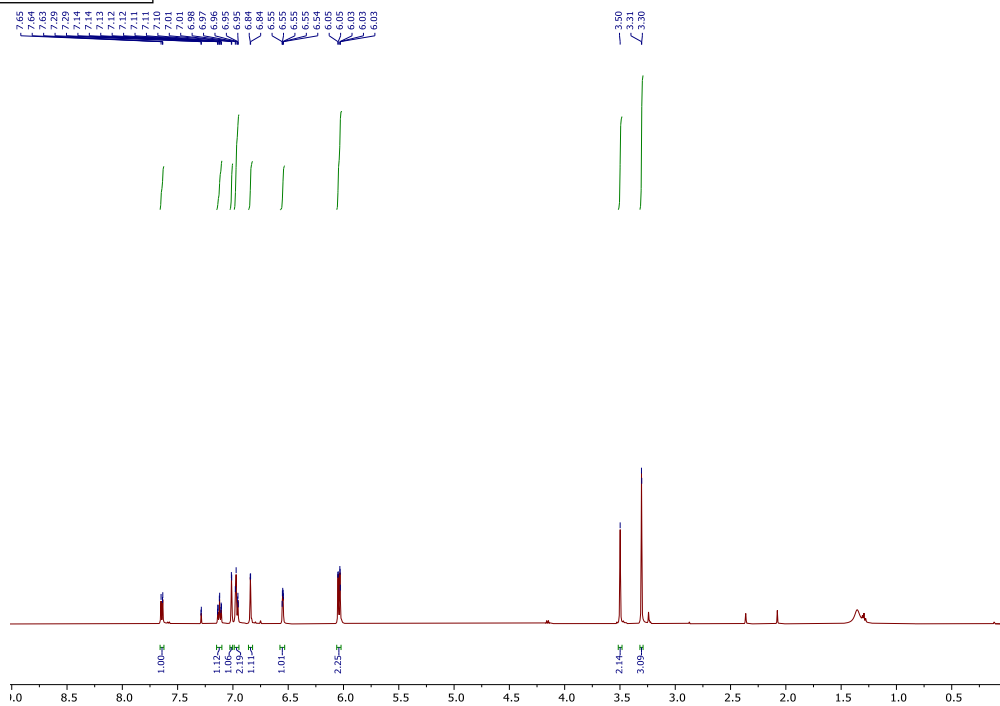

$^1\text{H}$  NMR (400 MHz,  $\text{CDCl}_3$ ) of compound ( $\pm$ )-**12**

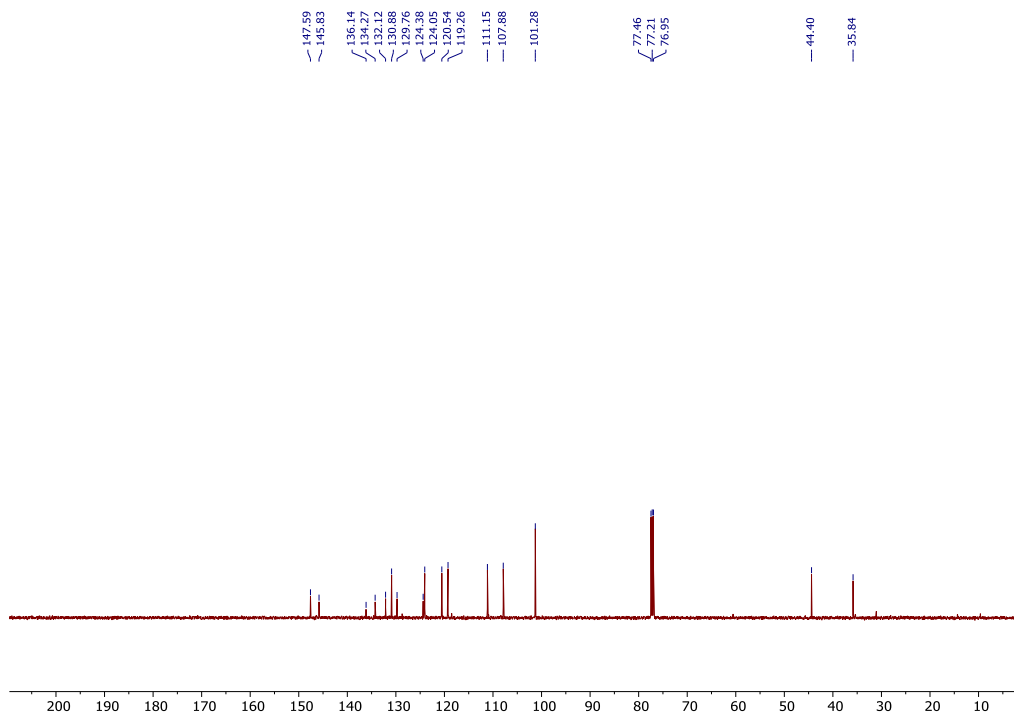

$^{13}\text{C}$   $\{^1\text{H}\}$  NMR (100 MHz,  $\text{CDCl}_3$ ) of compound ( $\pm$ )-**12**

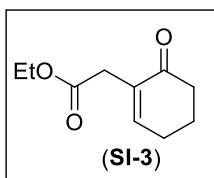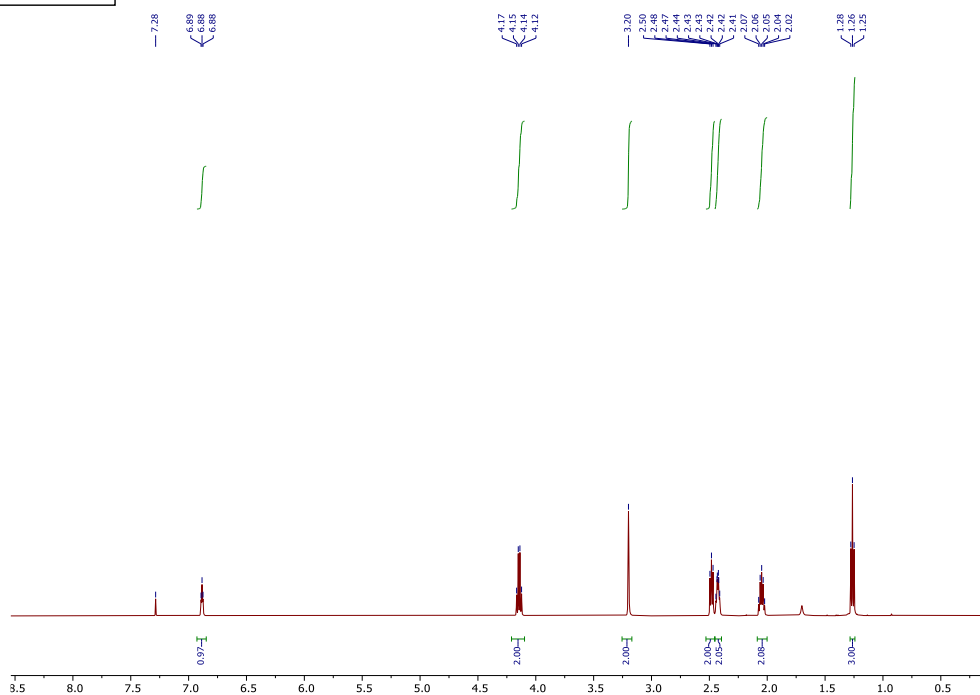

<sup>1</sup>H NMR (500 MHz, CDCl<sub>3</sub>) of compound **SI-3**

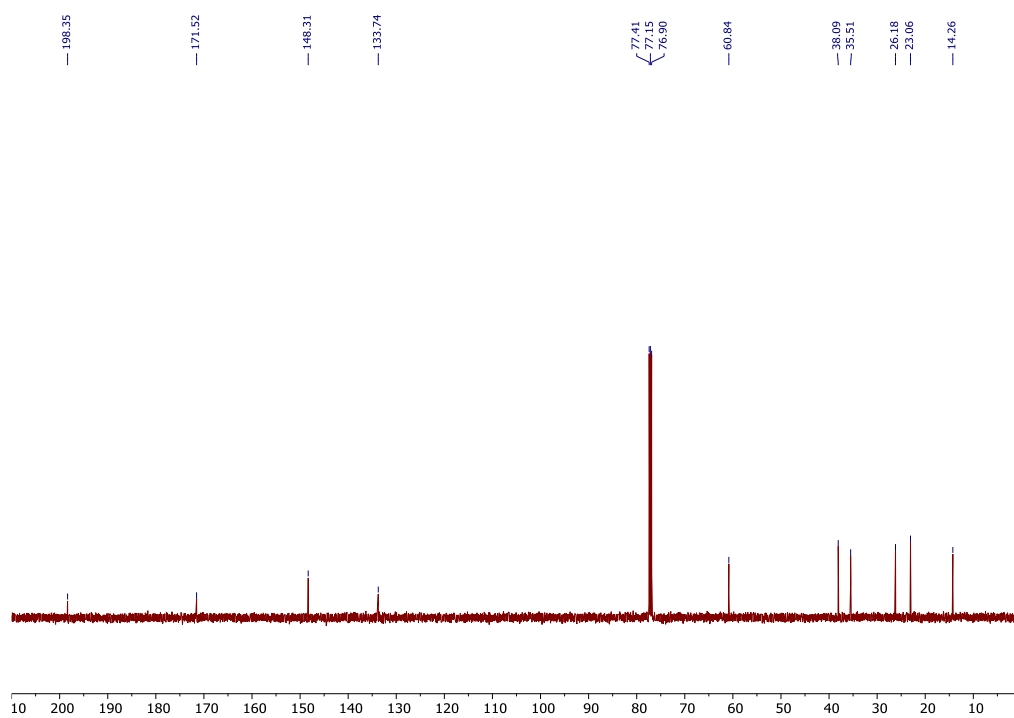

<sup>13</sup>C {<sup>1</sup>H} NMR (126 MHz, CDCl<sub>3</sub>) of compound **SI-3**



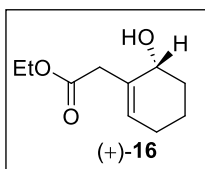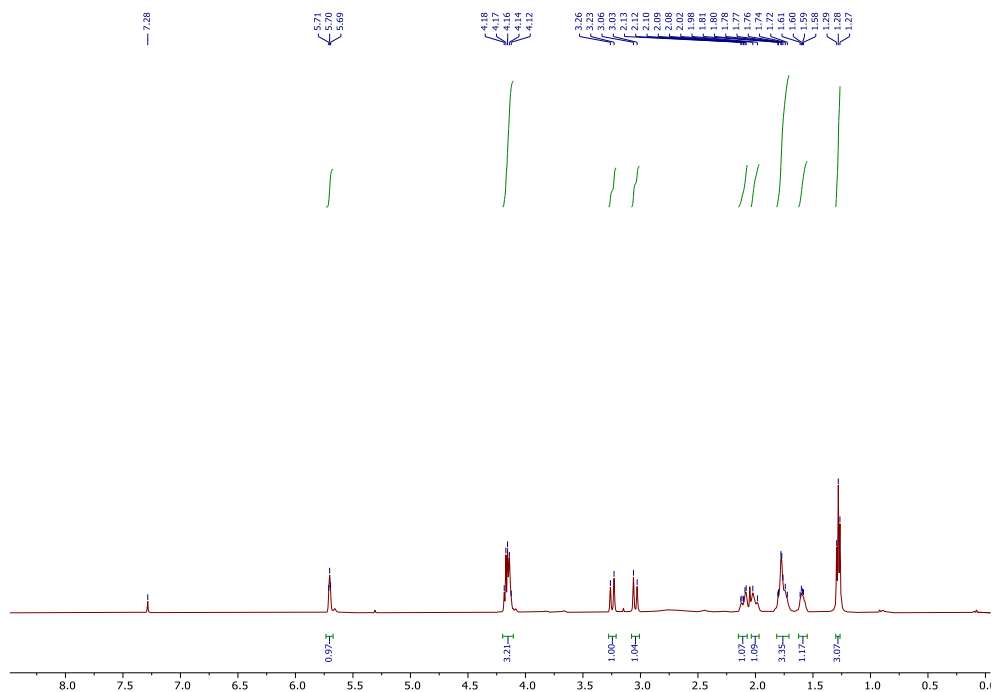

$^1\text{H}$  NMR (400 MHz,  $\text{CDCl}_3$ ) of compound (+)-16

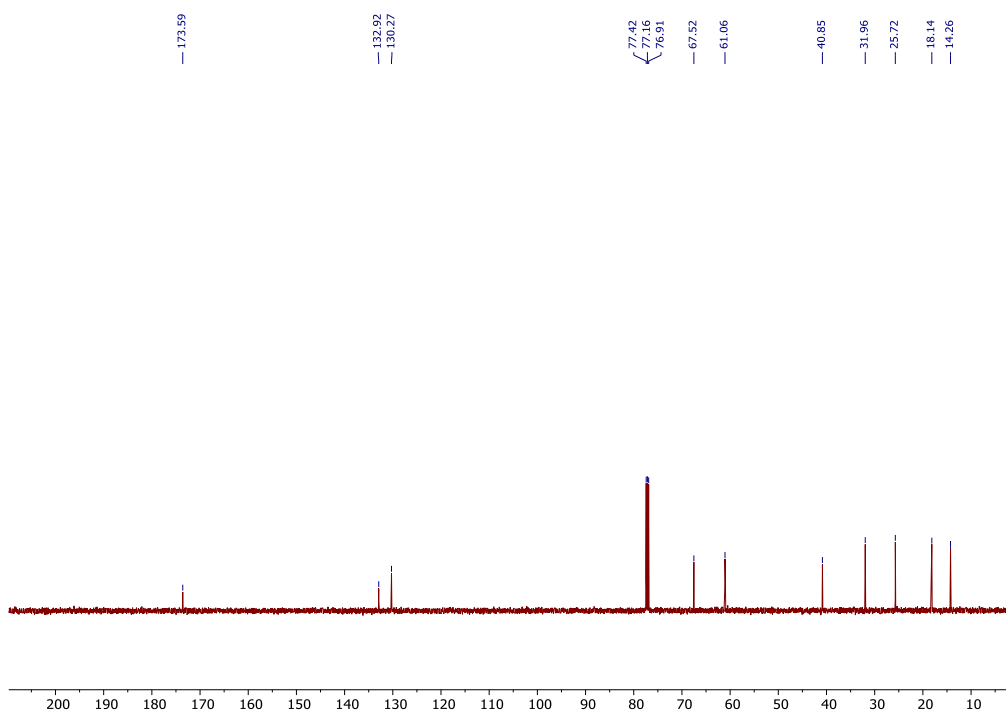

$^{13}\text{C}$   $\{^1\text{H}\}$  NMR (100 MHz,  $\text{CDCl}_3$ ) of compound (+)-16

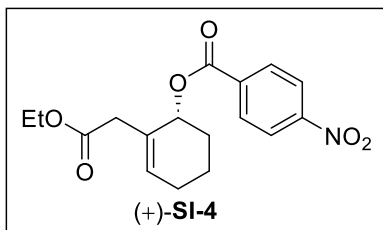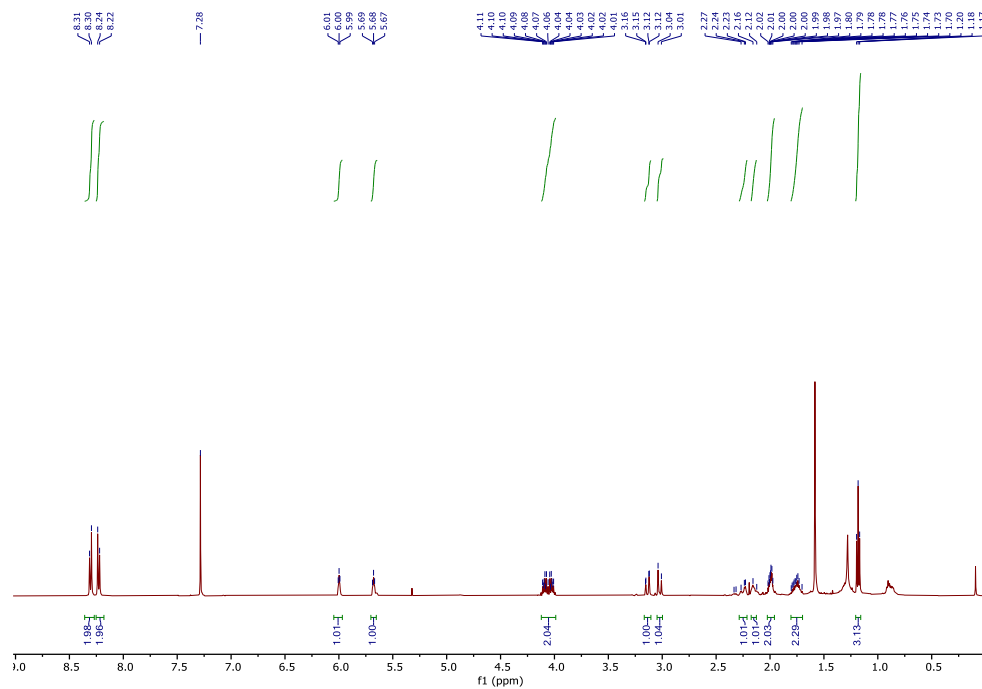

<sup>1</sup>H NMR (500 MHz, CDCl<sub>3</sub>) of compound (+)-SI-4

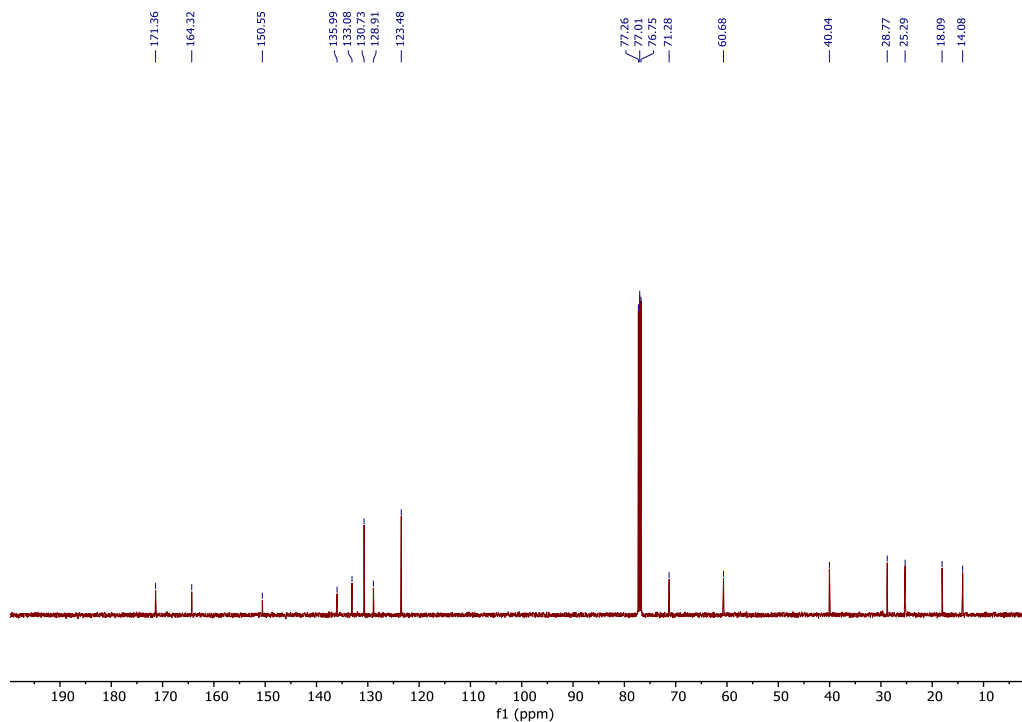

<sup>13</sup>C NMR (126 MHz, CDCl<sub>3</sub>) of compound (+)-SI-4

# Display Report

## Analysis Info

Analysis Name D:\Data\User data\2023\NOV\AB-AYA-02110.d  
Method Tune\_pos\_Standard\_July2022.m  
Sample Name AB-AYA-02110  
Comment

Acquisition Date 11/10/2023 10:57:17 AM

Operator IISER Kolkata  
Instrument maXis impact 8282001.00127

## Acquisition Parameter

|             |          |                      |          |                  |           |
|-------------|----------|----------------------|----------|------------------|-----------|
| Source Type | ESI      | Ion Polarity         | Positive | Set Nebulizer    | 0.4 Bar   |
| Focus       | Active   | Set Capillary        | 4500 V   | Set Dry Heater   | 200 °C    |
| Scan Begin  | 50 m/z   | Set End Plate Offset | -500 V   | Set Dry Gas      | 4.0 l/min |
| Scan End    | 1000 m/z | Set Charging Voltage | 2000 V   | Set Divert Valve | Source    |
|             |          | Set Corona           | 0 nA     | Set APCI Heater  | 0 °C      |

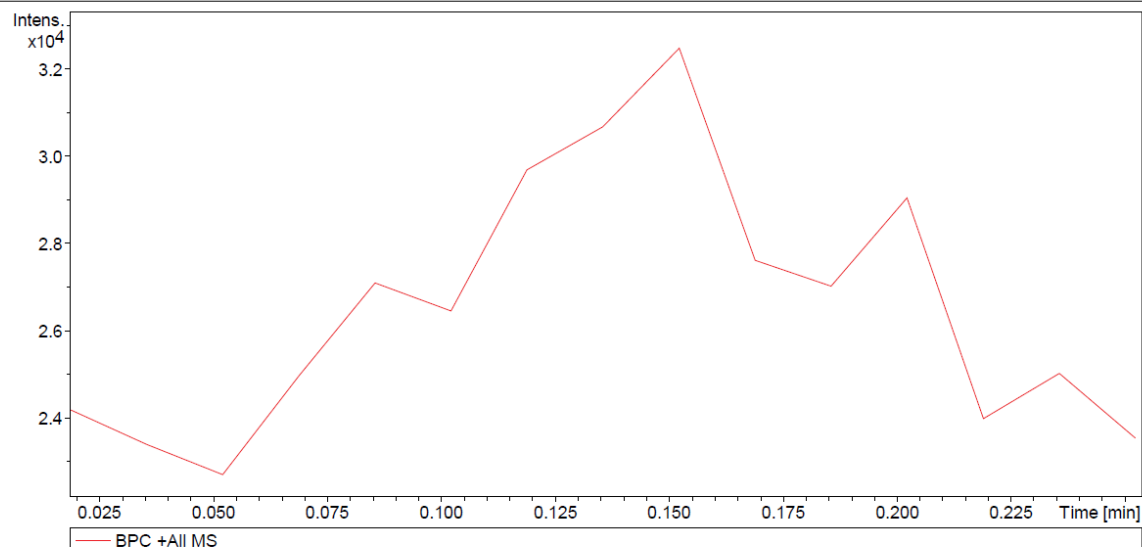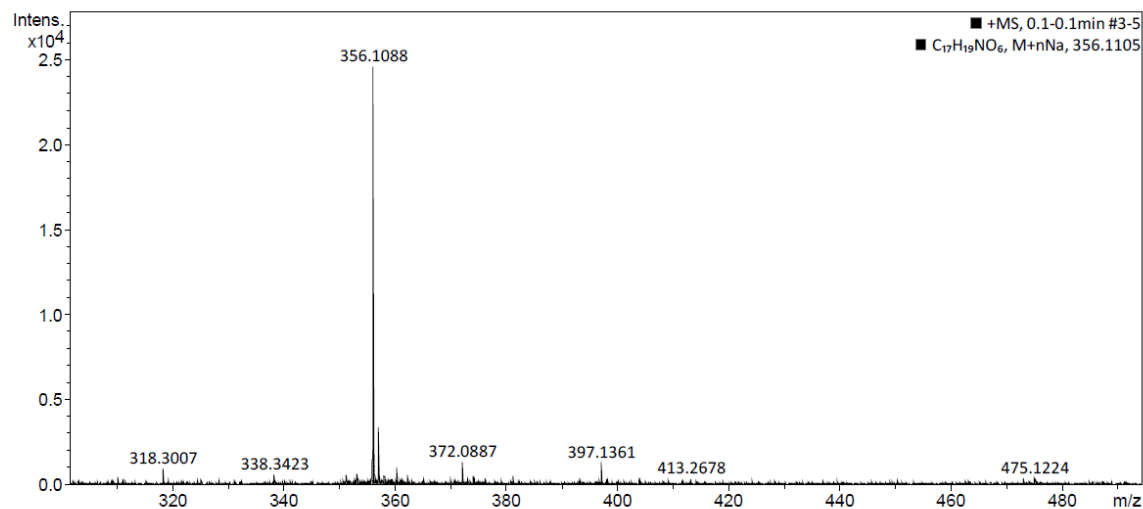

AB-AYA-02110.d

Bruker Compass DataAnalysis 4.1

printed: 11/10/2023 10:59:17 AM

by: IISER Kolkata

Page 1 of 1

HRMS data of (+)-SI-4

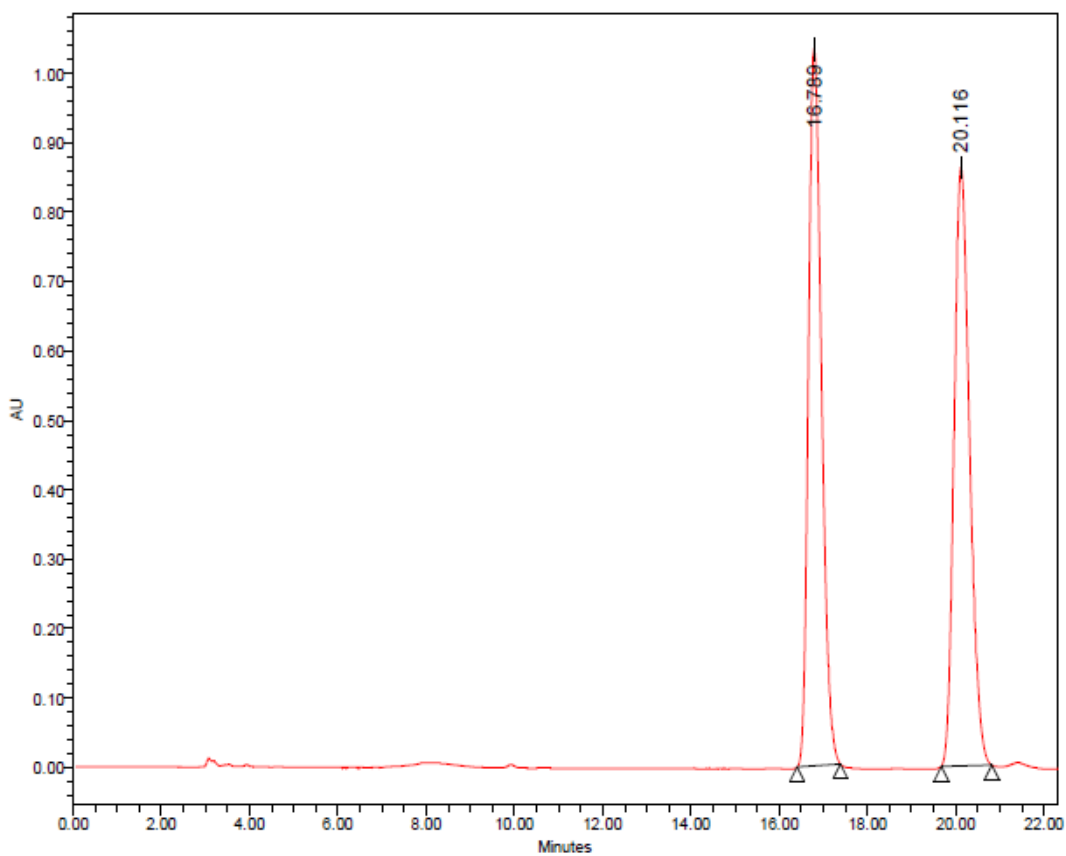

Sample Name: AB\_AYA\_02110\_RAC\_IC3\_15\_1; Date Acquired: 27-12-2022 22:36:18 IST; Vial: 1  
Injection: 1

**Peak Summary with Statistics**

Name:

|           | Sample Name               | Vial | Inj | Retention Time (min) | Area     | % Area | Height  |
|-----------|---------------------------|------|-----|----------------------|----------|--------|---------|
| 1         | AB_AYA_02110_RAC_IC3_15_1 | 1    | 1   | 20.116               | 21083777 | 50.00  | 862683  |
| 2         | AB_AYA_02110_RAC_IC3_15_1 | 1    | 1   | 16.789               | 21087326 | 50.00  | 1032817 |
| Mean      |                           |      |     | 18.452               |          |        |         |
| Std. Dev. |                           |      |     | 2.353                |          |        |         |

HPLC data of (±)-SI-4

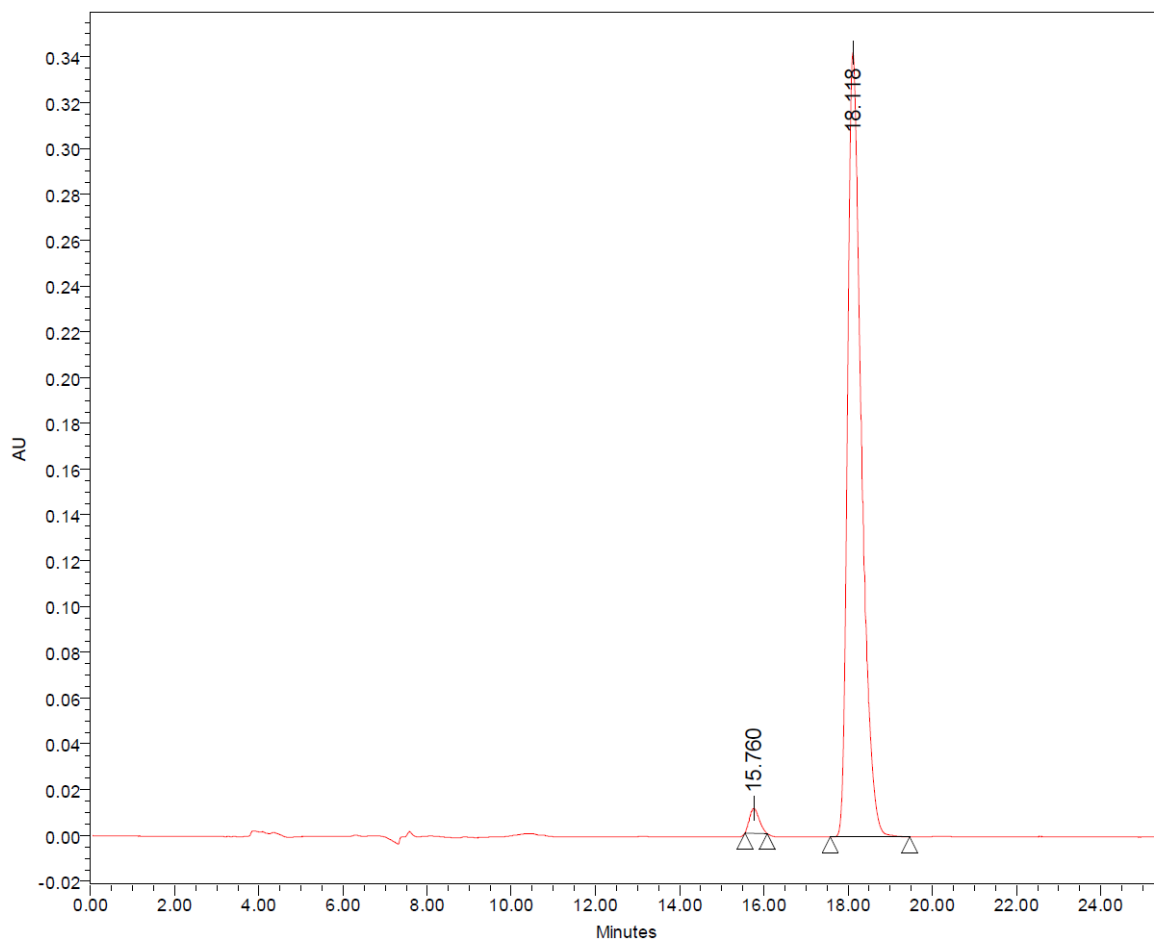

Sample Name: AB-SP-02CBSN-IC-3-15-01-CHI; Date Acquired: 16-09-2024 21:09:09 IST; Vial: 1:A,1; Injection: 1

Peak Summary with Statistics

Name:

|           | Sample Name                 | Vial  | Inj | Retention Time (min) | Area    | % Area | Height |
|-----------|-----------------------------|-------|-----|----------------------|---------|--------|--------|
| 1         | AB-SP-02CBSN-IC-3-15-01-CHI | 1:A,1 | 1   | 18.118               | 7813233 | 97.87  | 342538 |
| 2         | AB-SP-02CBSN-IC-3-15-01-CHI | 1:A,1 | 1   | 15.760               | 170364  | 2.13   | 10787  |
| Mean      |                             |       |     | 16.939               |         |        |        |
| Std. Dev. |                             |       |     | 1.667                |         |        |        |

Reported by User: System  
 Report Method: Peak Summary Report  
 Report Method ID: 2585  
 Page: 1 of 2

Project Name: AB Research Group  
 Date Printed: 16-09-2024  
 21:38:10 Asia/Kolkata

HPLC data of (+)-SI-4

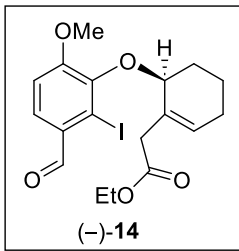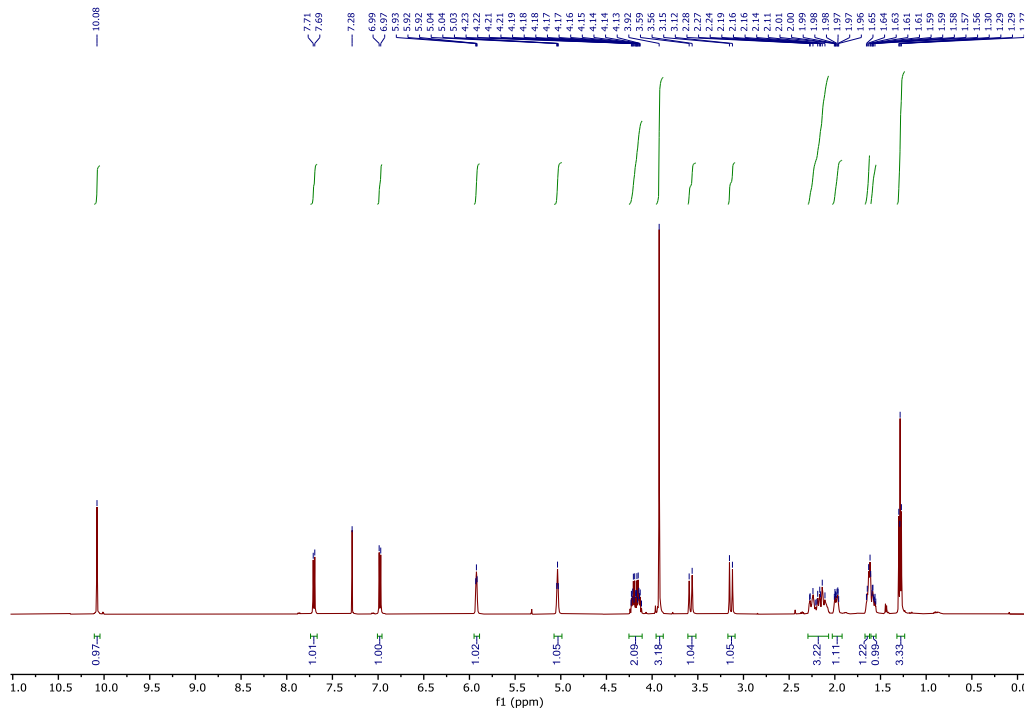

**$^1\text{H}$  NMR (500 MHz,  $\text{CDCl}_3$ ) of (-)-14**

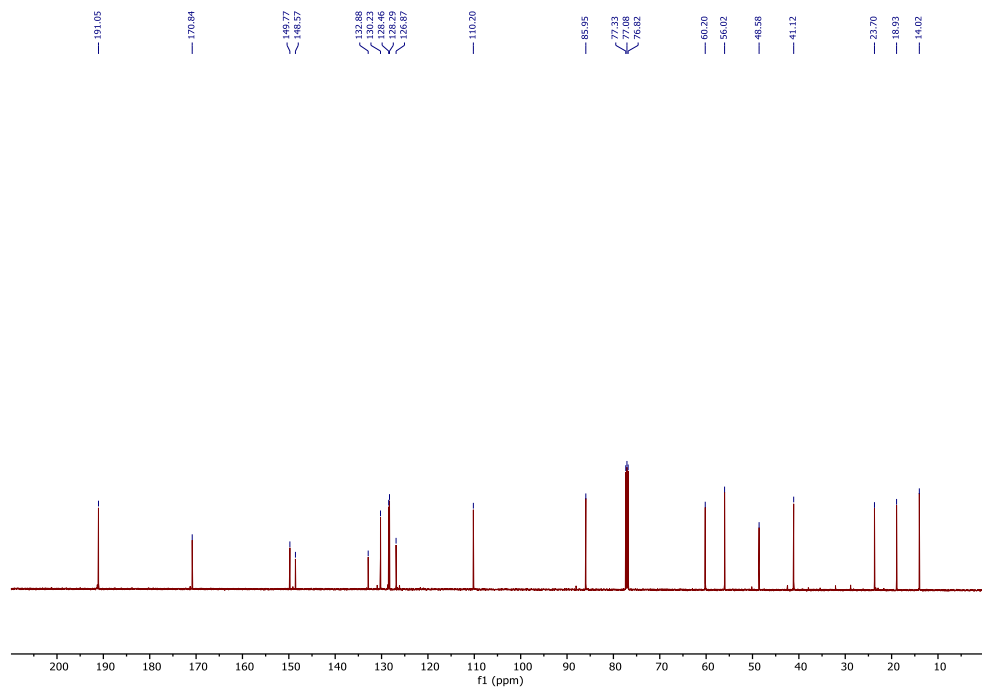

**$^{13}\text{C}$   $\{^1\text{H}\}$  NMR (126 MHz,  $\text{CDCl}_3$ ) of (-)-14**

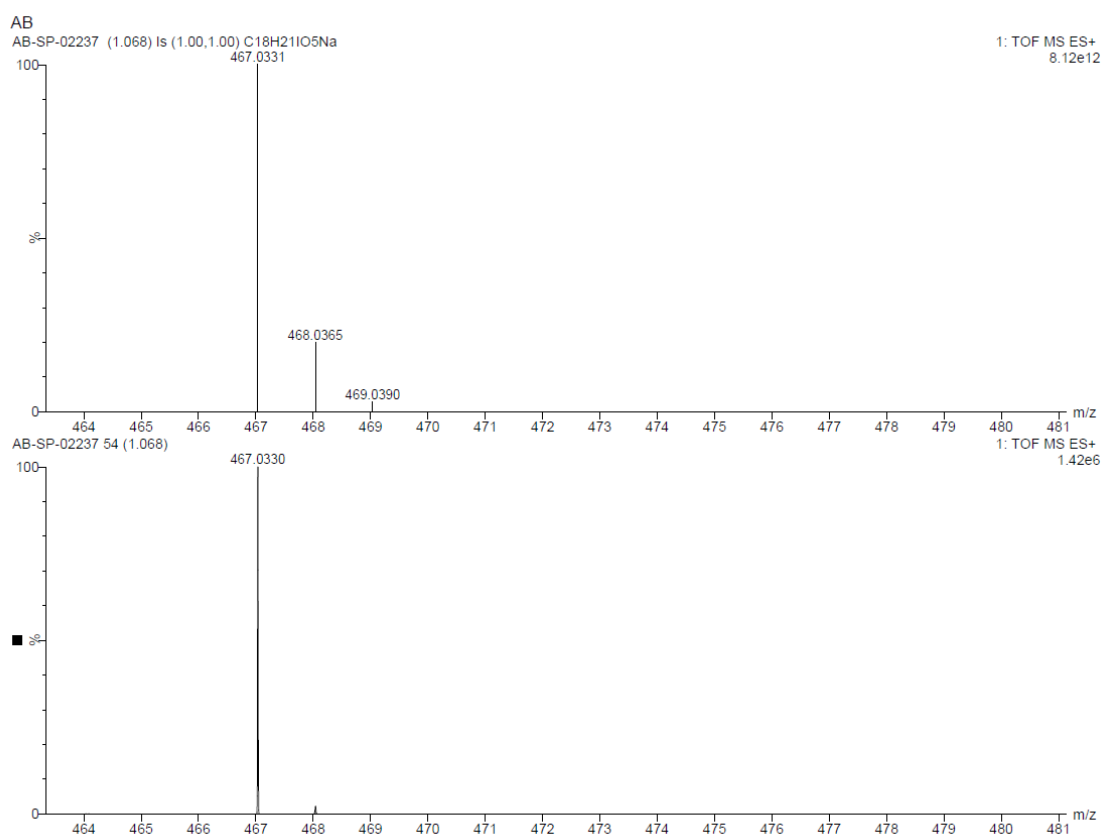

HRMS data of (-)-14

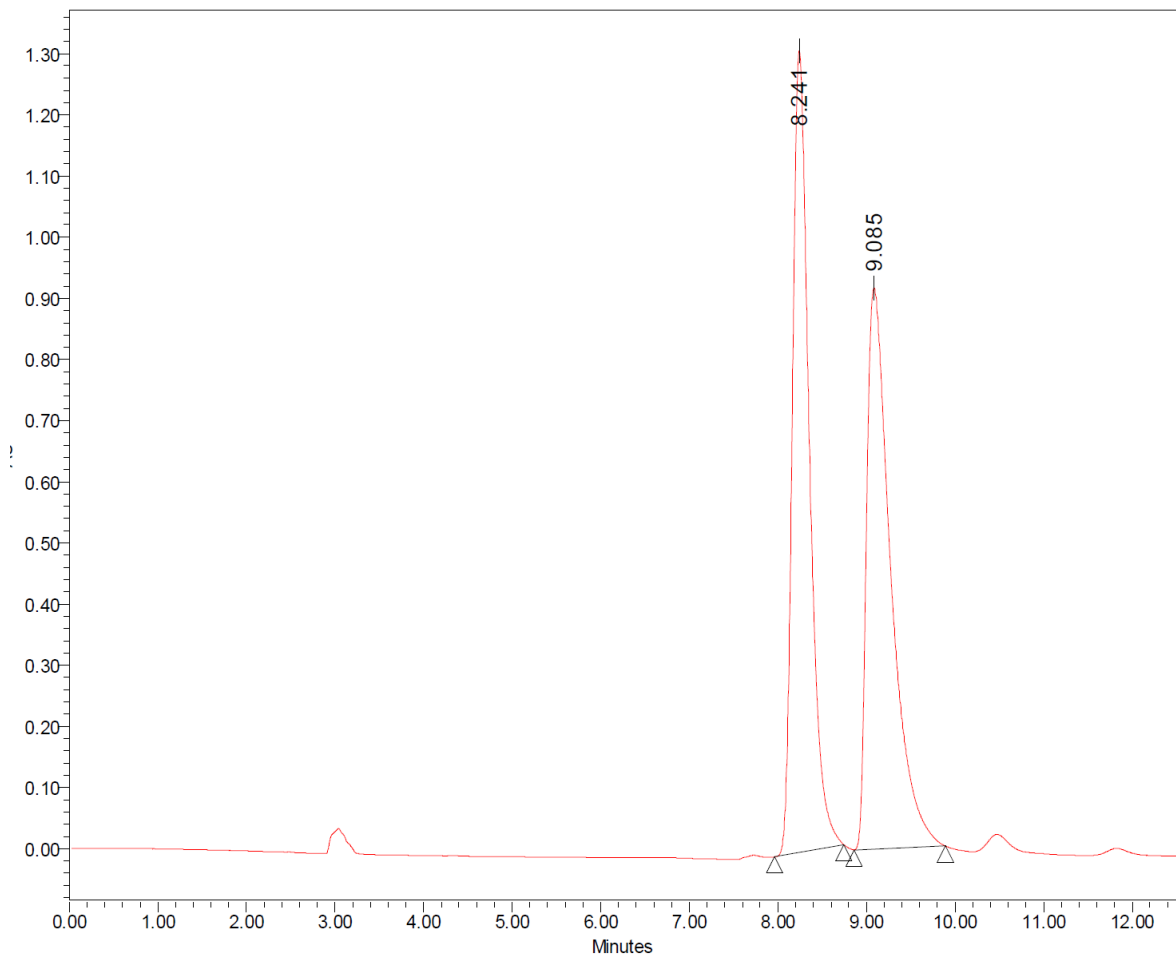

Sample Name: AB-SP\_02227R\_OD-H\_10\_01\_RAC; Date Acquired: 26-12-2023 14:14:44 IST; Vial: 1  
 Injection: 1

**Peak Summary with Statistics**  
**Name :**

|           | Sample Name                 | Vial | Inj | Retention Time (min) | Area     | % Area | Height  |
|-----------|-----------------------------|------|-----|----------------------|----------|--------|---------|
| 1         | AB-SP_02227R_OD-H_10_01_RAC | 1    | 1   | 8.241                | 17523849 | 50.11  | 1311456 |
| 2         | AB-SP_02227R_OD-H_10_01_RAC | 1    | 1   | 9.085                | 17446580 | 49.89  | 917490  |
| Mean      |                             |      |     | 8.663                |          |        |         |
| Std. Dev. |                             |      |     | 0.597                |          |        |         |

Reported by User: System  
 Report Method: Peak Summary Report  
 Report Method ID 7327  
 Page: 1 of 2

Project Name: AB Research Group  
 Date Printed:  
 26-12-2023  
 14:47:02 Asia/Calcutta

**HPLC data of (±)-14**



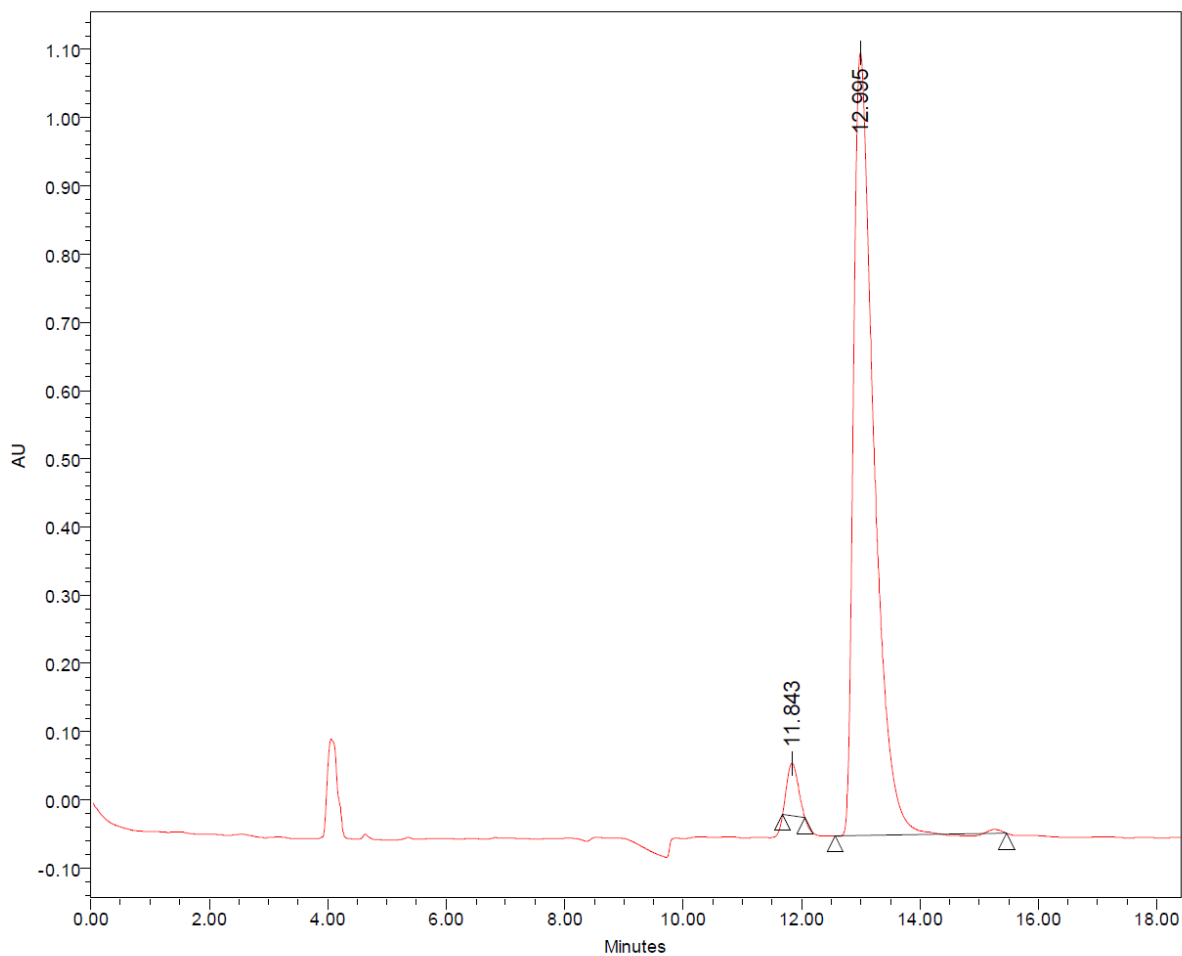

Sample Name: AB-SP-02382-OD-H-10-01-CHI; Date Acquired: 10-09-2024 14:17:37 IST; Vial: 1:A,1; Injection: 1

Peak Summary with Statistics  
Name:

|           | Sample Name                | Vial  | Inj | Retention Time (min) | Area     | % Area | Height  |
|-----------|----------------------------|-------|-----|----------------------|----------|--------|---------|
| 1         | AB-SP-02382-OD-H-10-01-CHI | 1:A,1 | 1   | 12.995               | 27622810 | 96.57  | 1147588 |
| 2         | AB-SP-02382-OD-H-10-01-CHI | 1:A,1 | 1   | 11.843               | 981782   | 3.43   | 76780   |
| Mean      |                            |       |     | 12.419               |          |        |         |
| Std. Dev. |                            |       |     | 0.815                |          |        |         |

Reported by User: System  
Report Method: Peak Summary Report  
Report Method ID: 2585  
Page: 1 of 2

Project Name: AB Research Group  
Date Printed: 06-10-2024  
11:07:22 Asia/Kolkata

HPLC data of (–)-**14** of optimized condition (entry 5).

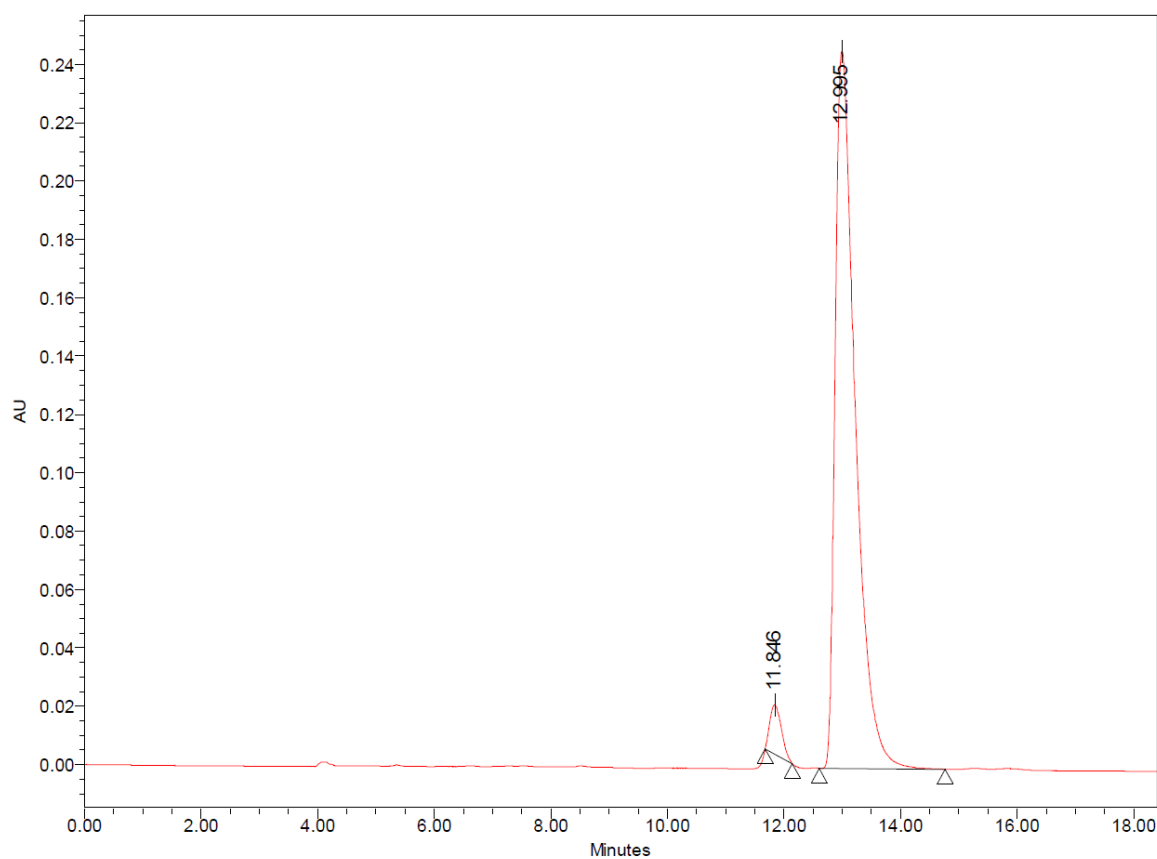

Sample Name: AB-SP-02382-OD-H-10-01-CHI; Date Acquired: 10-09-2024 14:17:37 IST; Vial: 1:A,1; Injection: 1

Peak Summary with Statistics  
Name:

|           | Sample Name                | Vial  | Inj | Retention Time (min) | Area    | % Area | Height |
|-----------|----------------------------|-------|-----|----------------------|---------|--------|--------|
| 1         | AB-SP-02382-OD-H-10-01-CHI | 1:A,1 | 1   | 12.995               | 5889246 | 96.17  | 245717 |
| 2         | AB-SP-02382-OD-H-10-01-CHI | 1:A,1 | 1   | 11.846               | 234631  | 3.83   | 16867  |
| Mean      |                            |       |     | 12.420               |         |        |        |
| Std. Dev. |                            |       |     | 0.813                |         |        |        |

HPLC data of (-)-**14** of reaction condition of entry 8

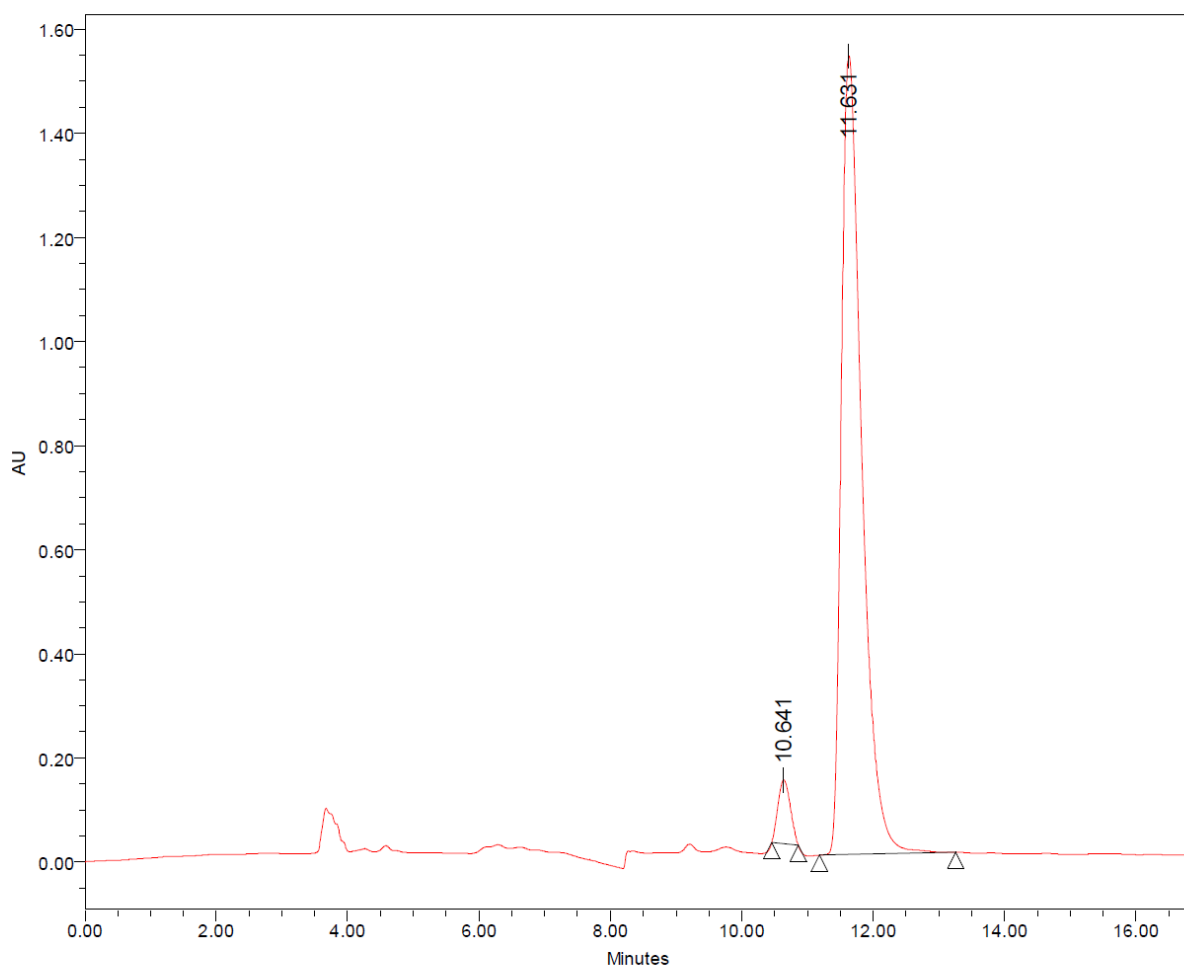

Sample Name: AB-SP-02MITDEPBU-OD-H-30-01; Date Acquired: 23-09-2024 22:46:12 IST; Vial: 1:A,1; Injection: 1

Peak Summary with Statistics  
Name:

|           | Sample Name                 | Vial  | Inj | Retention Time (min) | Area     | % Area | Height  |
|-----------|-----------------------------|-------|-----|----------------------|----------|--------|---------|
| 1         | AB-SP-02MITDEPBU-OD-H-30-01 | 1:A,1 | 1   | 11.631               | 32979747 | 95.41  | 1535098 |
| 2         | AB-SP-02MITDEPBU-OD-H-30-01 | 1:A,1 | 1   | 10.641               | 1587898  | 4.59   | 122178  |
| Mean      |                             |       |     | 11.136               |          |        |         |
| Std. Dev. |                             |       |     | 0.700                |          |        |         |

HPLC data of (–)-**14** of reaction condition of entry 3

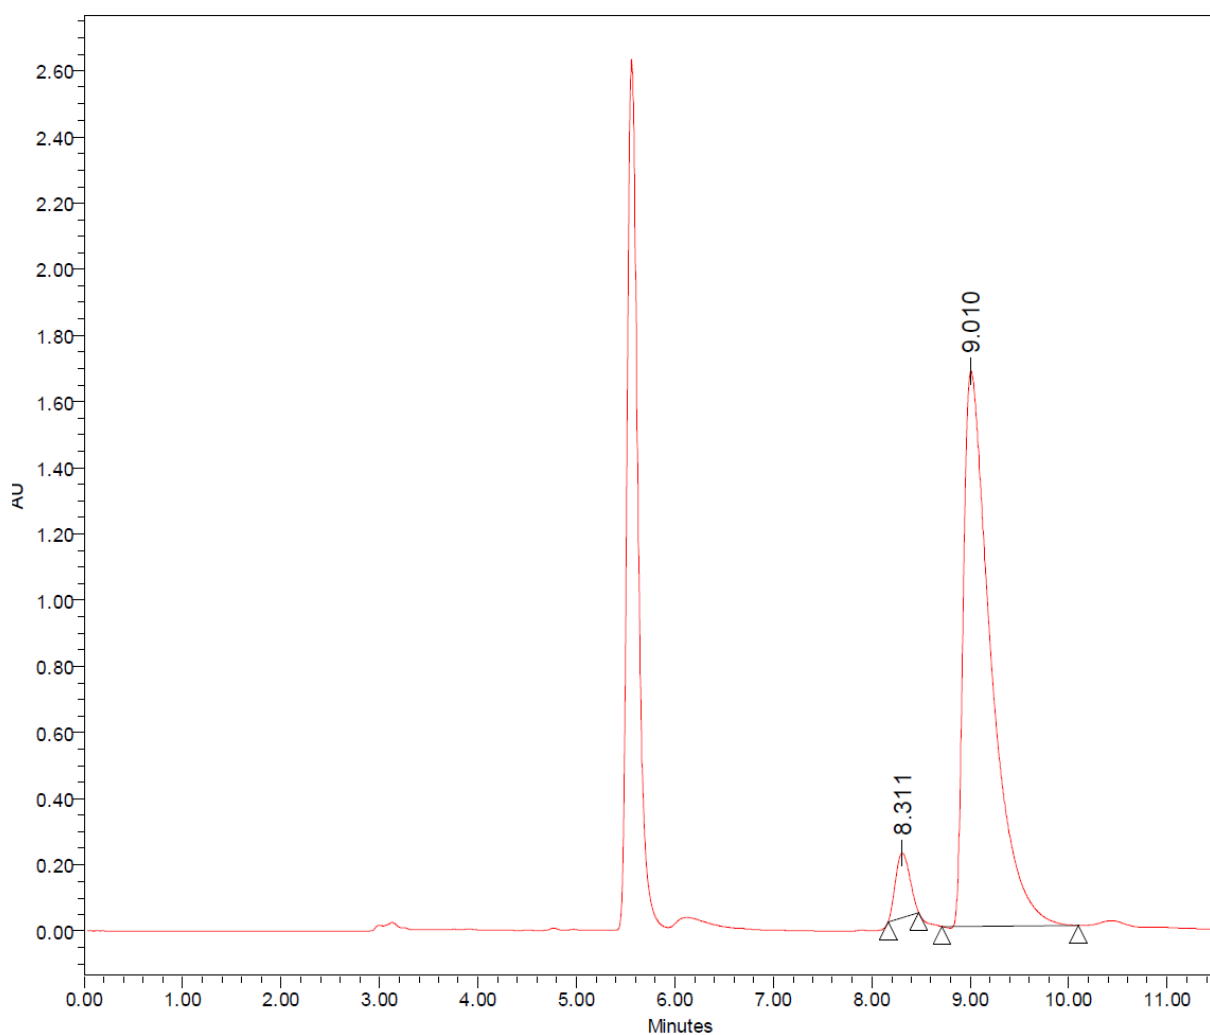

Sample Name: AB\_SP\_02382\_OD-H\_10\_01\_CHI; Date Acquired: 28-12-2023 20:14:45 IST; VI Injection: 2

**Peak Summary with Statistics**  
Name:

|           | Sample Name                | Vial | Inj | Retention Time (min) | Area     | % Area | Height  |
|-----------|----------------------------|------|-----|----------------------|----------|--------|---------|
| 1         | AB_SP_02382_OD-H_10_01_CHI | 1    | 2   | 9.010                | 32723637 | 94.38  | 1678628 |
| 2         | AB_SP_02382_OD-H_10_01_CHI | 1    | 2   | 8.311                | 1949747  | 5.62   | 195672  |
| Mean      |                            |      |     | 8.660                |          |        |         |
| Std. Dev. |                            |      |     | 0.494                |          |        |         |

HPLC data of (-)-**14** of reaction condition of entry 9

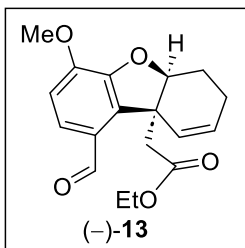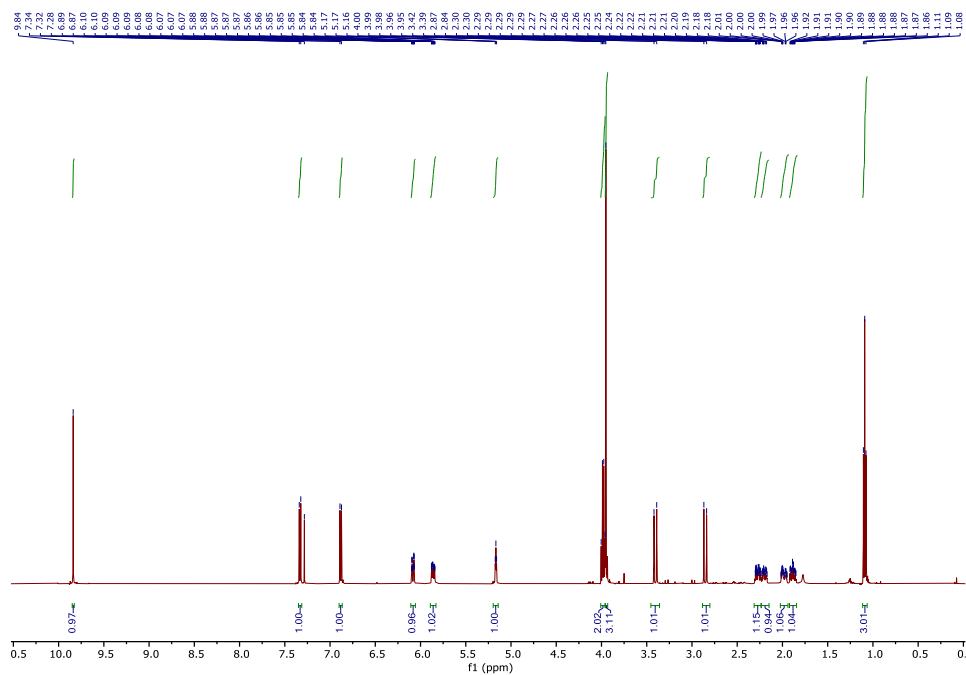

$^1\text{H}$  NMR (500 MHz,  $\text{CDCl}_3$ ) of **(-)-13**

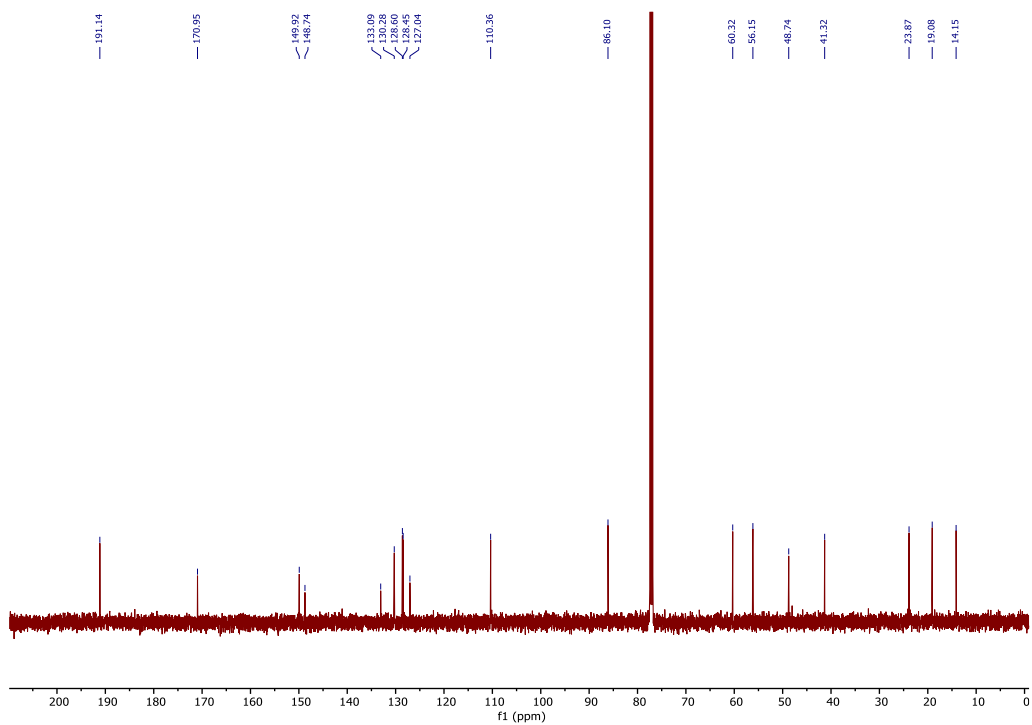

$^{13}\text{C}$   $\{^1\text{H}\}$  NMR (500 MHz,  $\text{CDCl}_3$ ) of **(-)-13**

AB07-Nov-2023 12:39:02  
AB-SP-02337 (0.053) Is (1.00,1.00) C18H20O5Na

IISER - KOLKATA

1: TOF MS ES+  
8.12e12

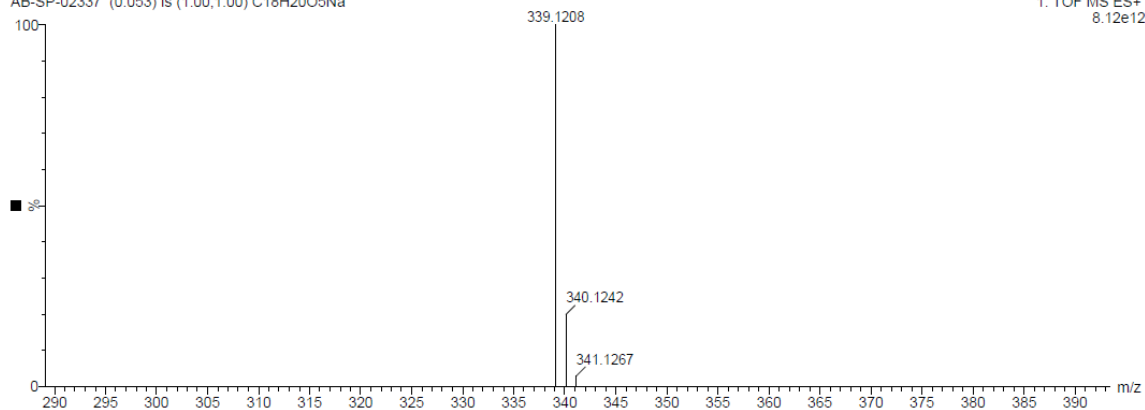

AB-SP-02337 33 (0.674) AM2 (Ar,22000.0,556.28,0.00,LS 10); ABS

1: TOF MS ES+  
1.01e7

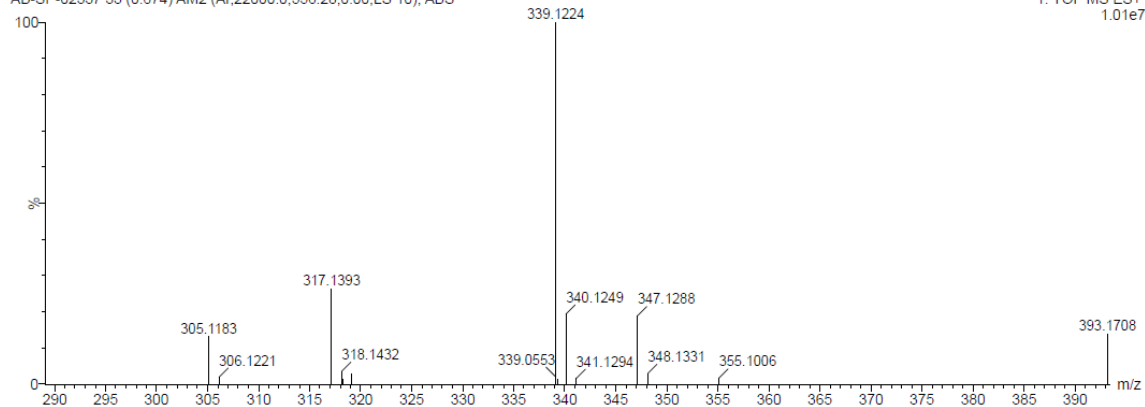

HRMS data of (-)-13

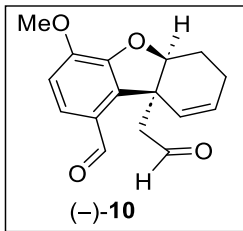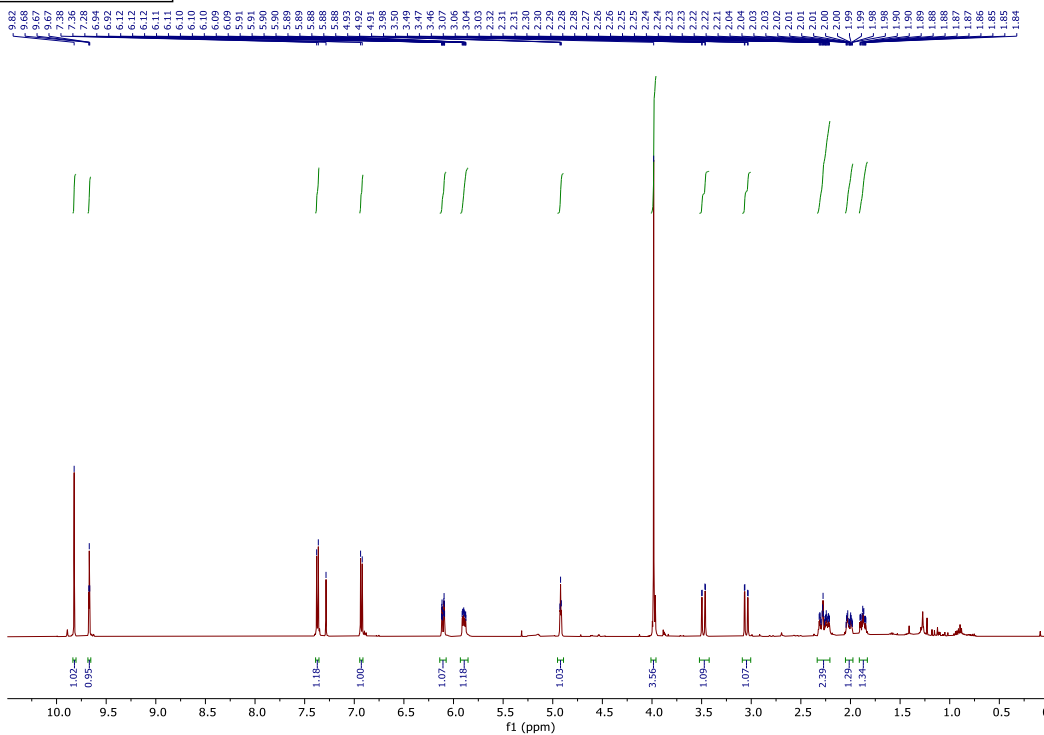

<sup>1</sup>H NMR (500 MHz, CDCl<sub>3</sub>) of (-)-10

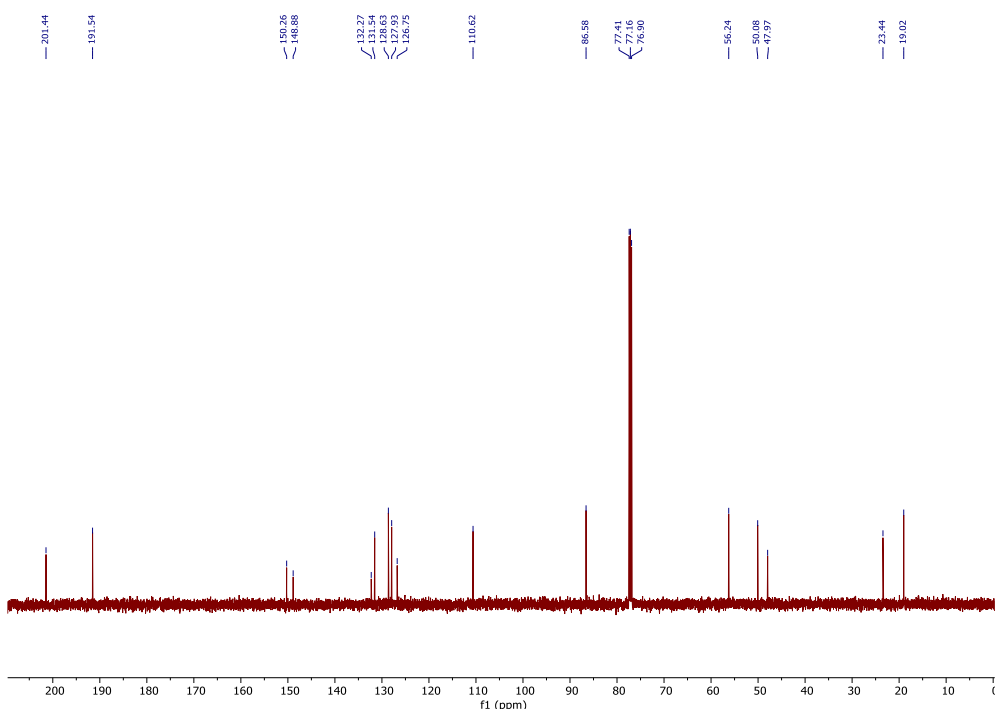

<sup>13</sup>C {<sup>1</sup>H} NMR (126 MHz, CDCl<sub>3</sub>) of (-)-10

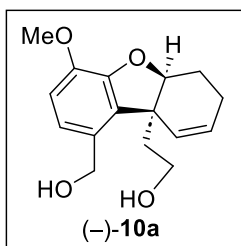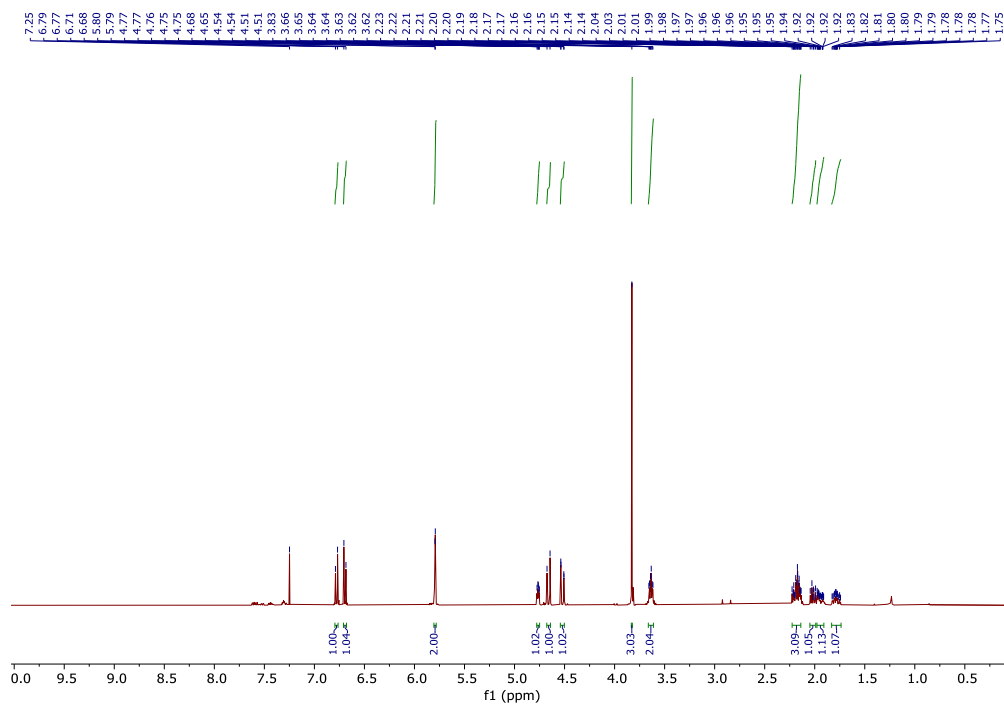

**$^1\text{H}$  NMR (400 MHz,  $\text{CDCl}_3$ ) of (-)-10a**

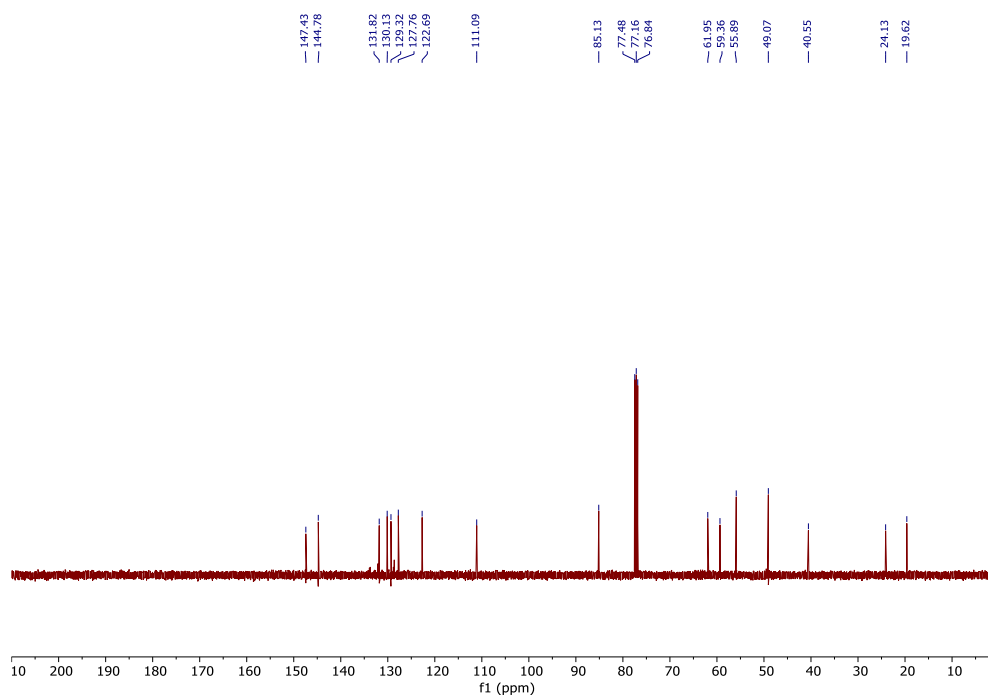



AB16-Oct-2024 12:10:48  
AB-DBM-QPLAH (0.053) Is (1.00,1.00) C<sub>16</sub>H<sub>20</sub>O<sub>4</sub>Na

IISER-KOLKATA

1: TOF MS ES+  
8.32e12

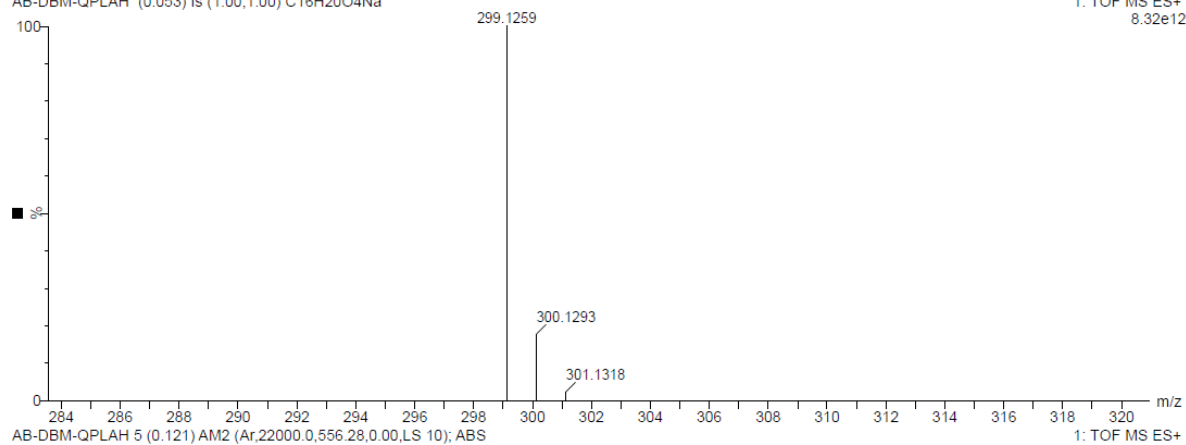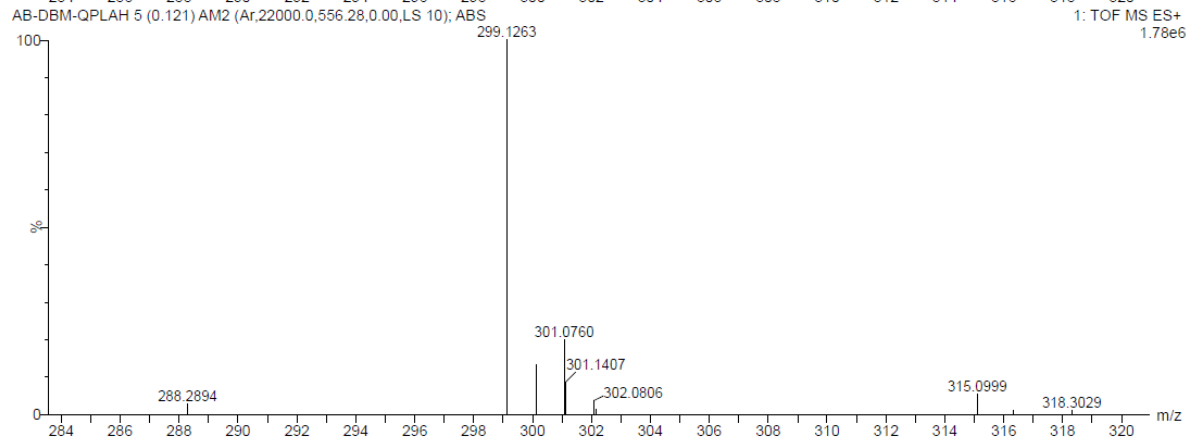

### HRMS data of 10a

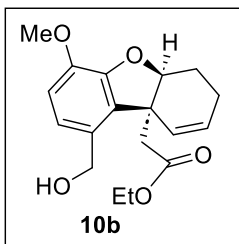

AB16-Oct-2024 12:14:00

IISER-KOLKATA

1: TOF MS ES+  
8.12e12

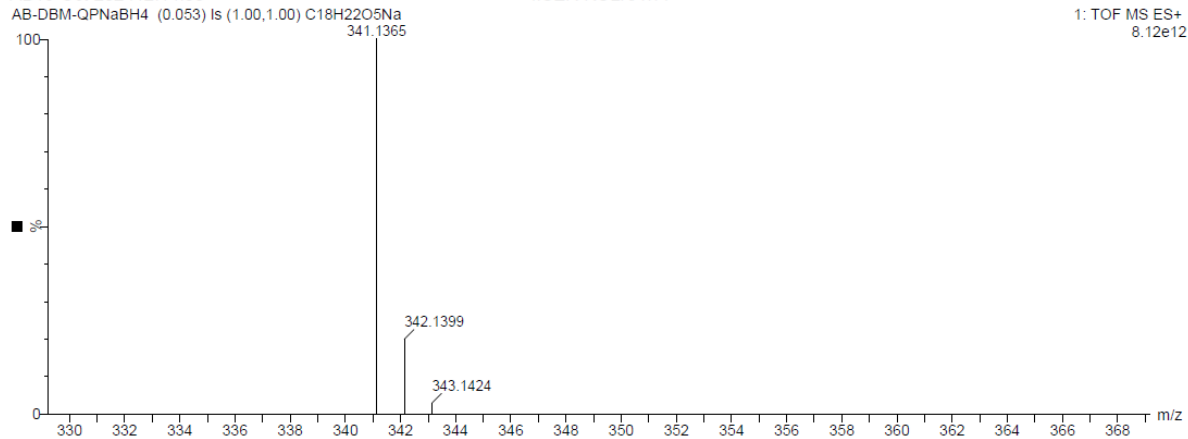

AB-DBM-QPNaBH4 4 (0.104) AM2 (Ar,22000.0,556.28,0,00,LS 10); ABS

1: TOF MS ES+  
5.11e6

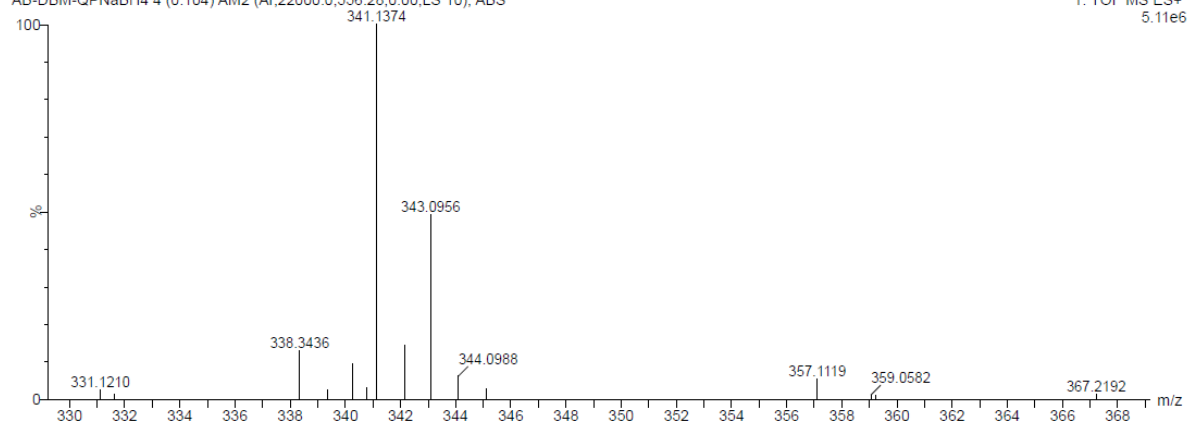

HRMS data of **10b**

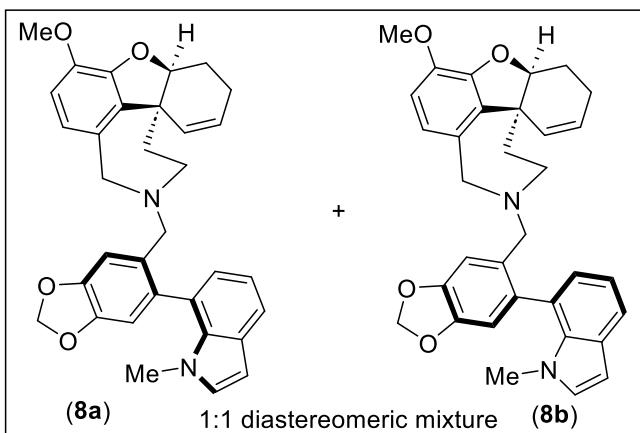

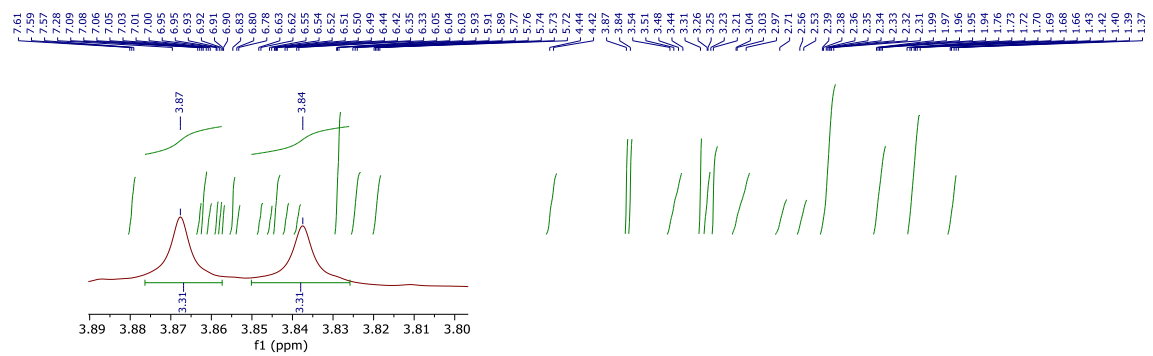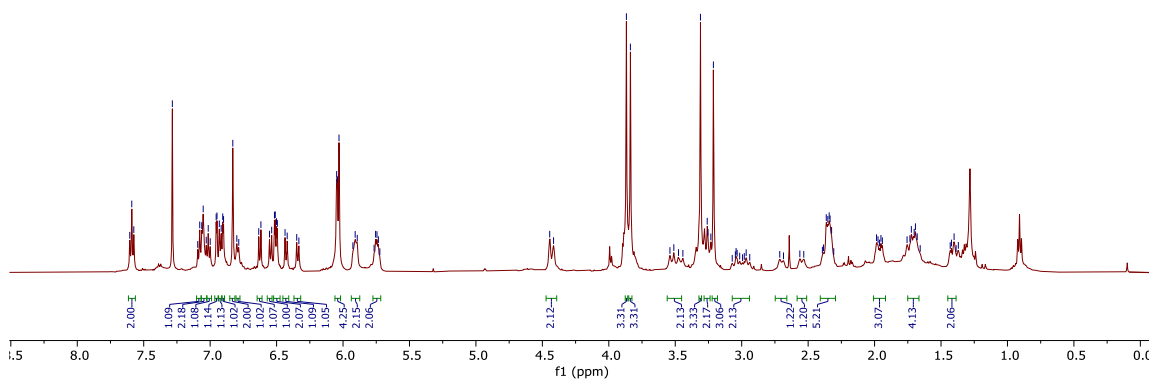

$^1\text{H}$  NMR (500 MHz,  $\text{CDCl}_3$ ) of [8a and 8b]

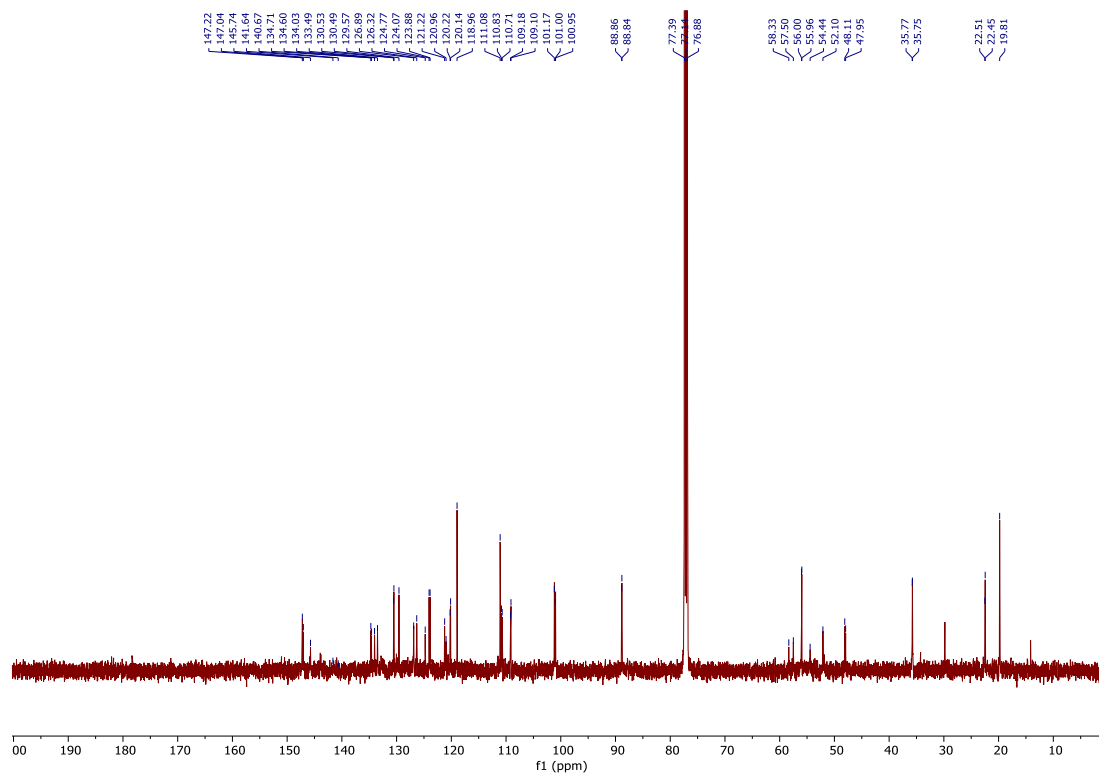

$^{13}\text{C}$   $\{^1\text{H}\}$  NMR (126 MHz,  $\text{CDCl}_3$ ) of [8a and 8b]

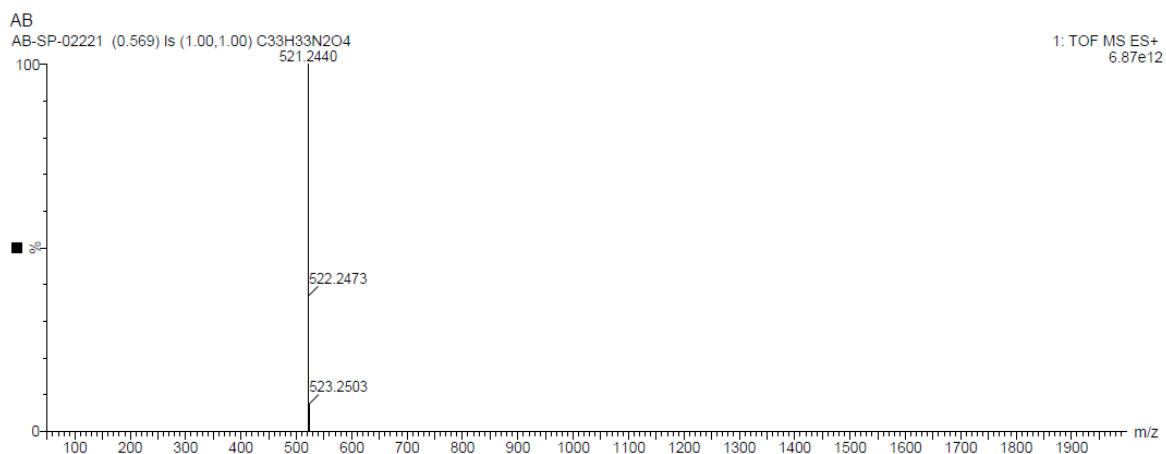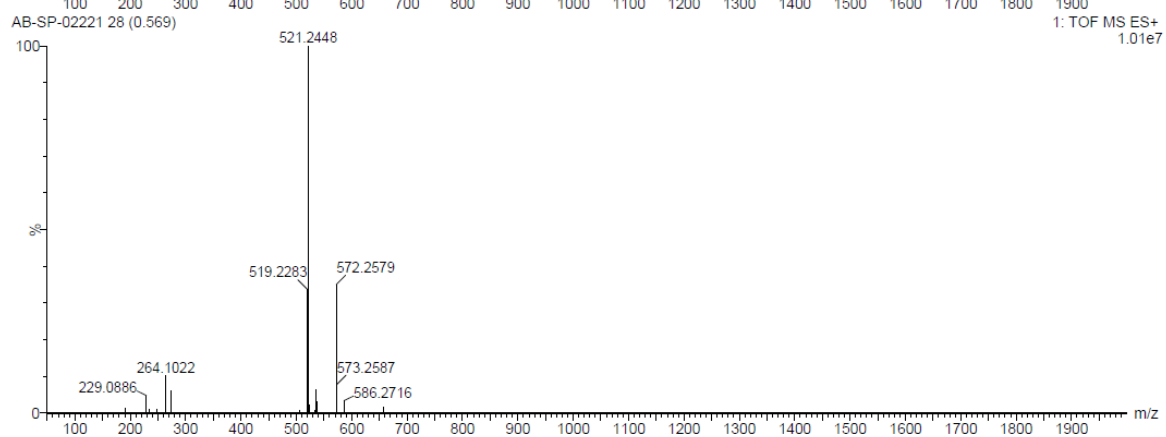

HRMS data of (-)-**8**

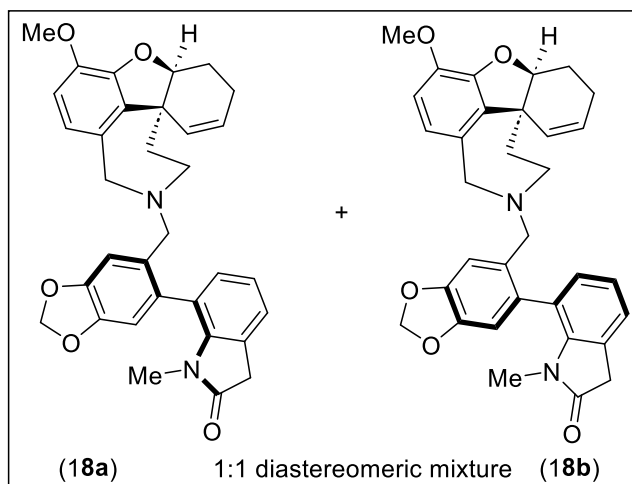

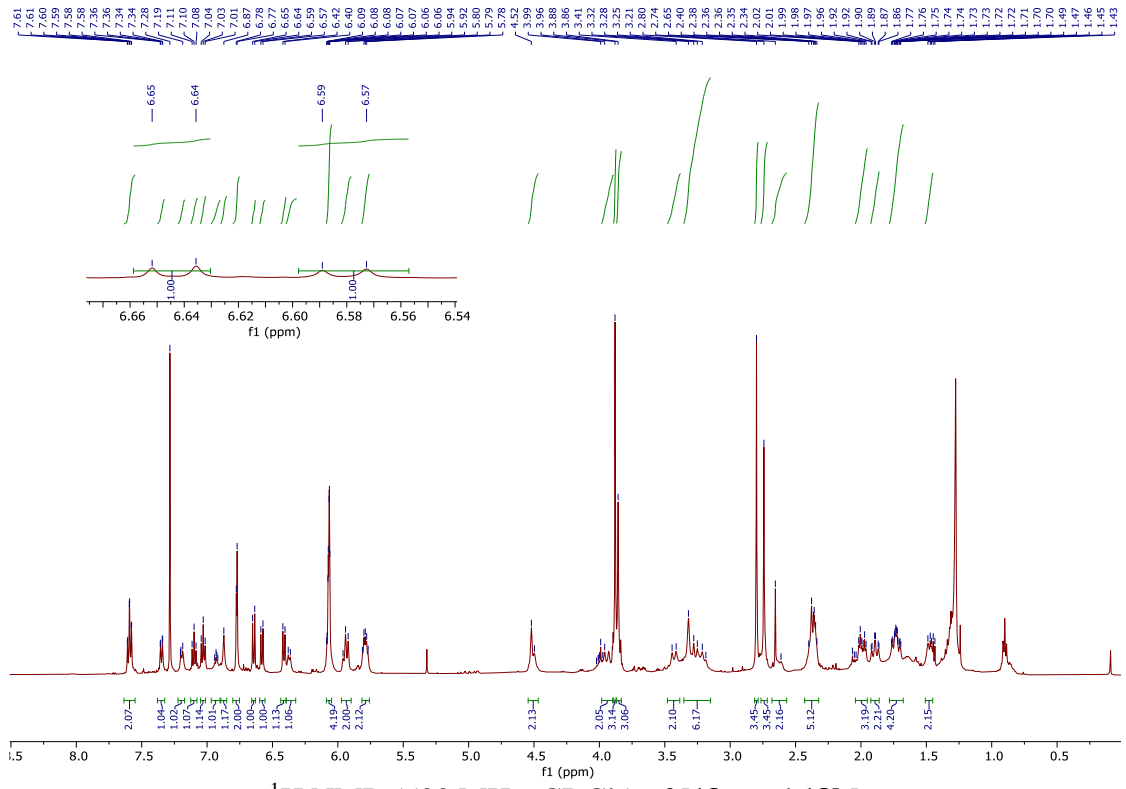

**<sup>1</sup>H NMR (500 MHz, CDCl<sub>3</sub>) of [18a and 18b]**

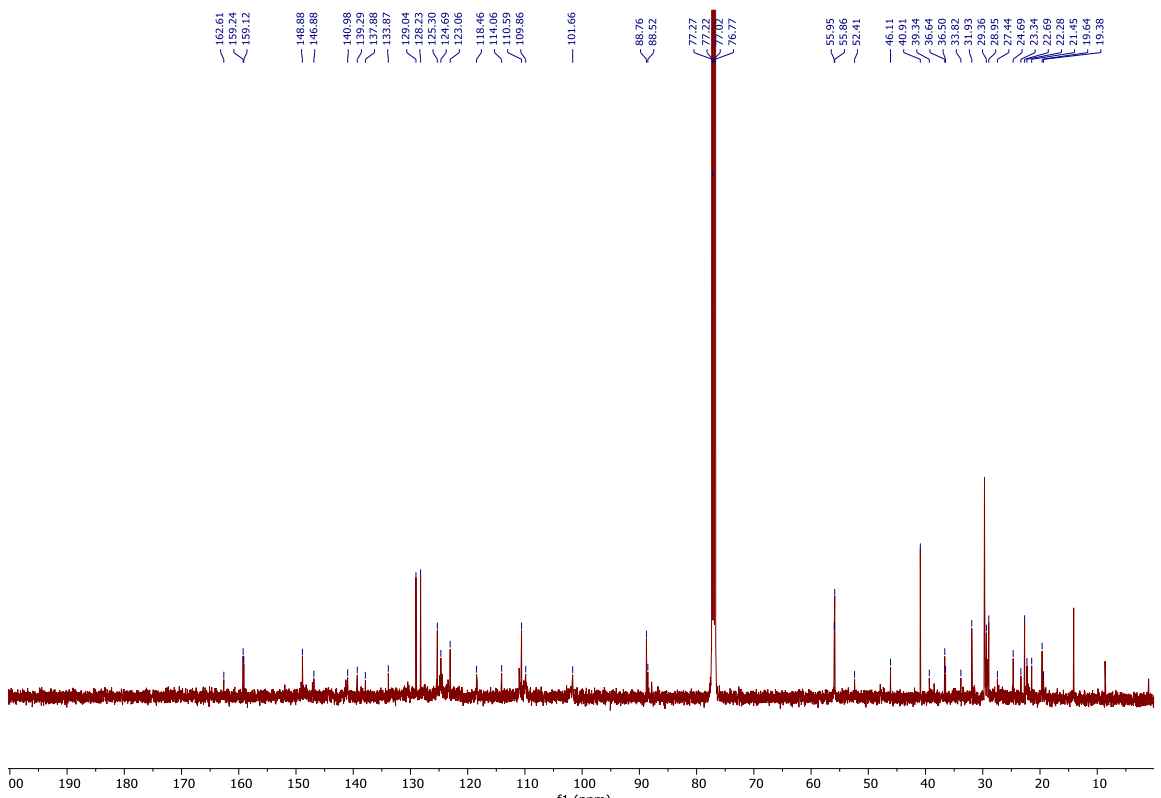

**<sup>13</sup>C {<sup>1</sup>H} NMR (126 MHz, CDCl<sub>3</sub>) of [18a and 18b]**

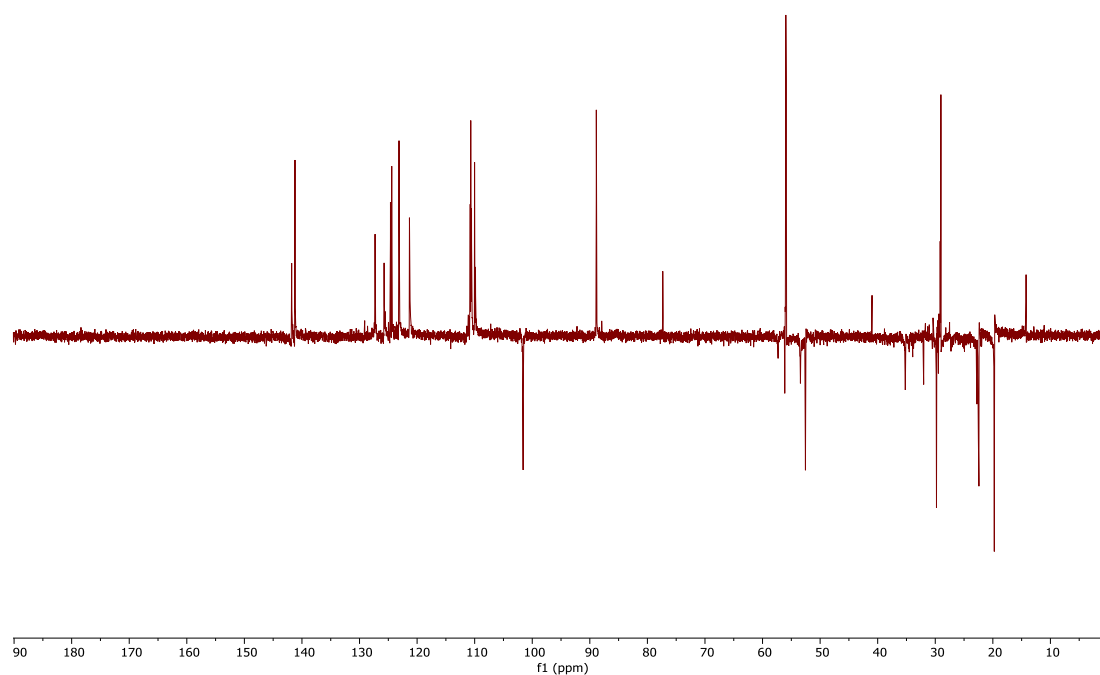

DEPT-135 NMR (126 MHz,  $\text{CDCl}_3$ ) of mixtures [18a and 18b]

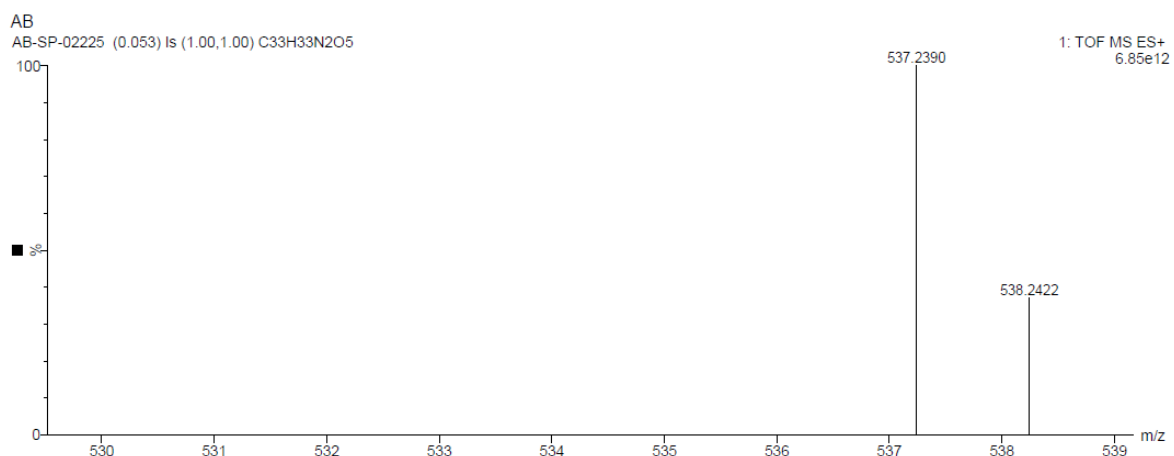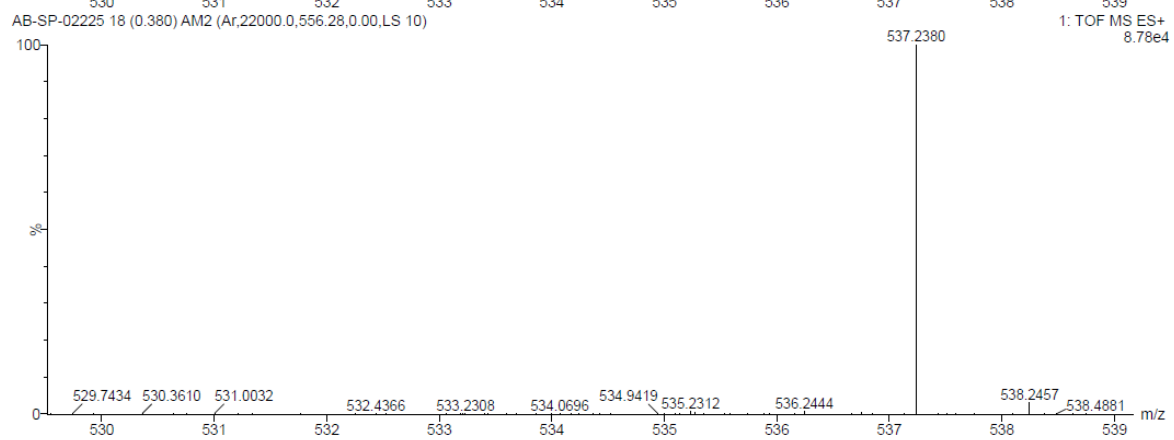

HRMS data of (-)-18

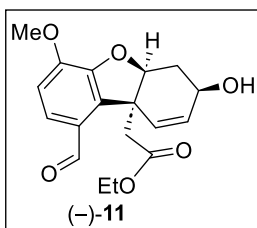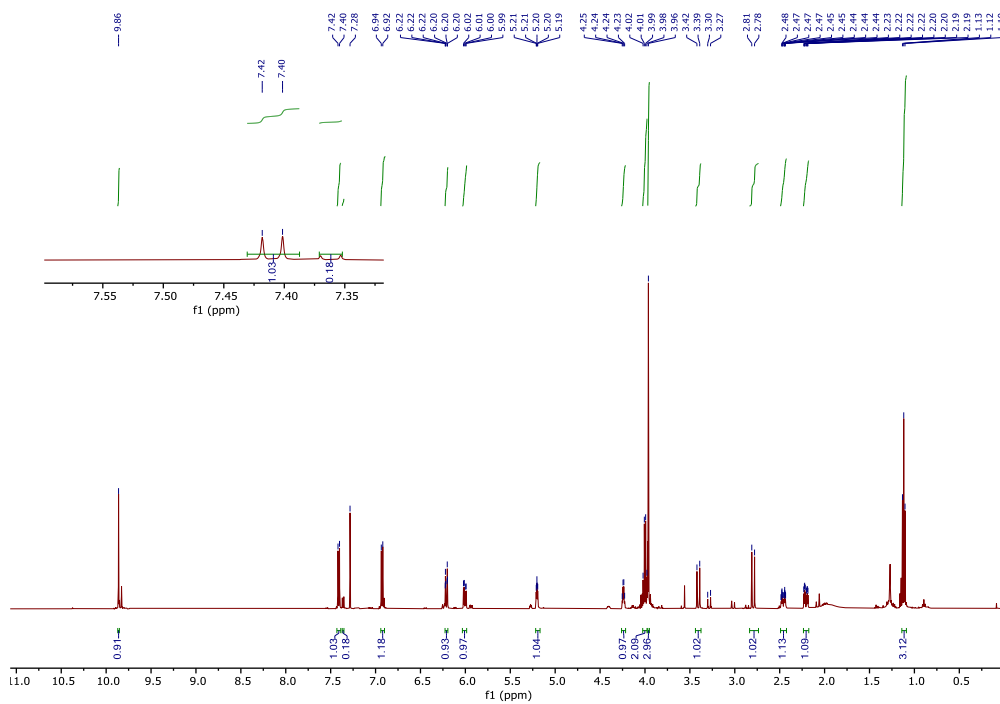

$^1\text{H}$  NMR (500 MHz,  $\text{CDCl}_3$ ) of (-)-11

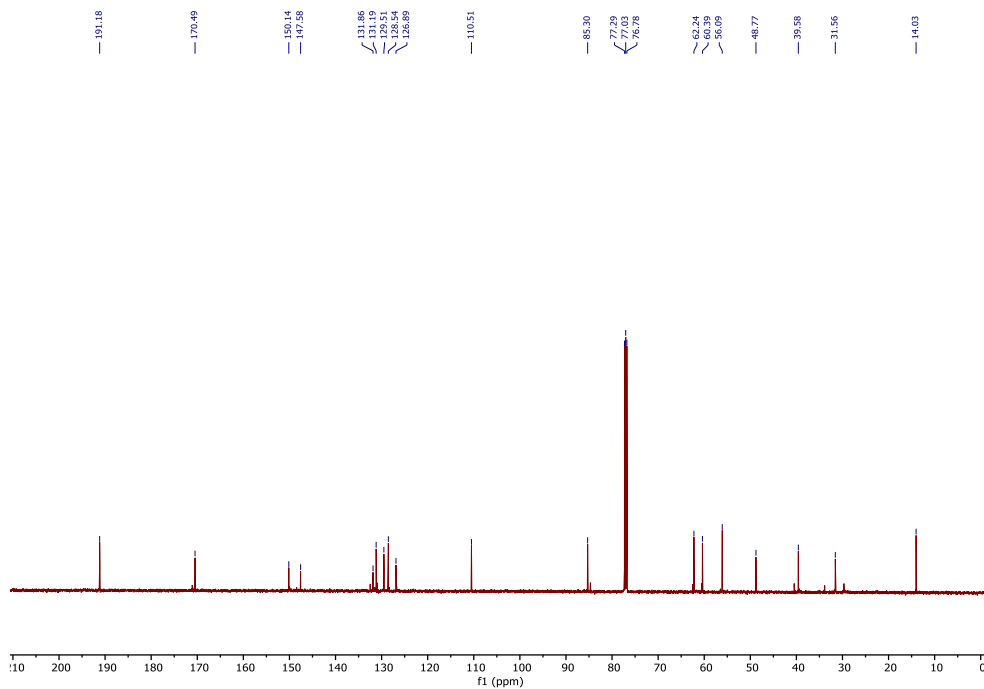

$^{13}\text{C}$  { $^1\text{H}$ } NMR (126 MHz,  $\text{CDCl}_3$ ) of (-)-11

## Display Report

**Analysis Info**  
Analysis Name: D:\Data\User\_data\2023\JAN\lab\_sp\_02255.d  
Method: Tune\_pos\_Standard\_July2022.new.m  
Sample Name: ab\_sp\_02255  
Comment:  
Acquisition Date: 1/30/2023 11:09:05 AM  
Operator: IISER Kolkata  
Instrument: maXis impact  
8282001.00127

**Acquisition Parameter**

|             |          |                      |          |                  |           |
|-------------|----------|----------------------|----------|------------------|-----------|
| Source Type | ESI      | Ion Polarity         | Positive | Set Nebulizer    | 0.4 Bar   |
| Focus       | Active   | Set Capillary        | 4500 V   | Set Dry Heater   | 200 °C    |
| Scan Begin  | 50 m/z   | Set End Plate Offset | -500 V   | Set Dry Gas      | 4.0 l/min |
| Scan End    | 1000 m/z | Set Charging Voltage | 2000 V   | Set Divert Valve | Source    |
|             |          | Set Corona           | 0 nA     | Set APCI Heater  | 0 °C      |

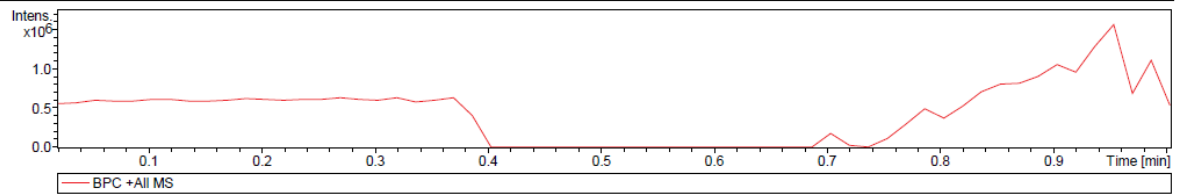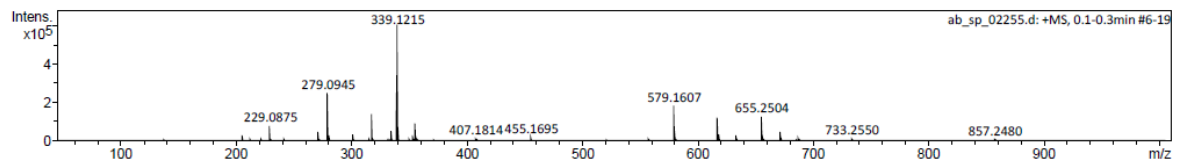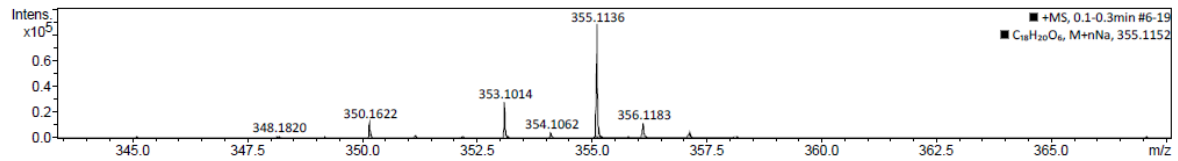

HRMS data of (-)-11



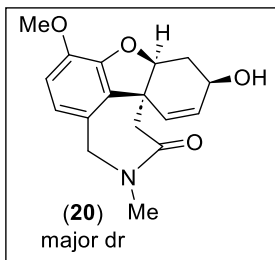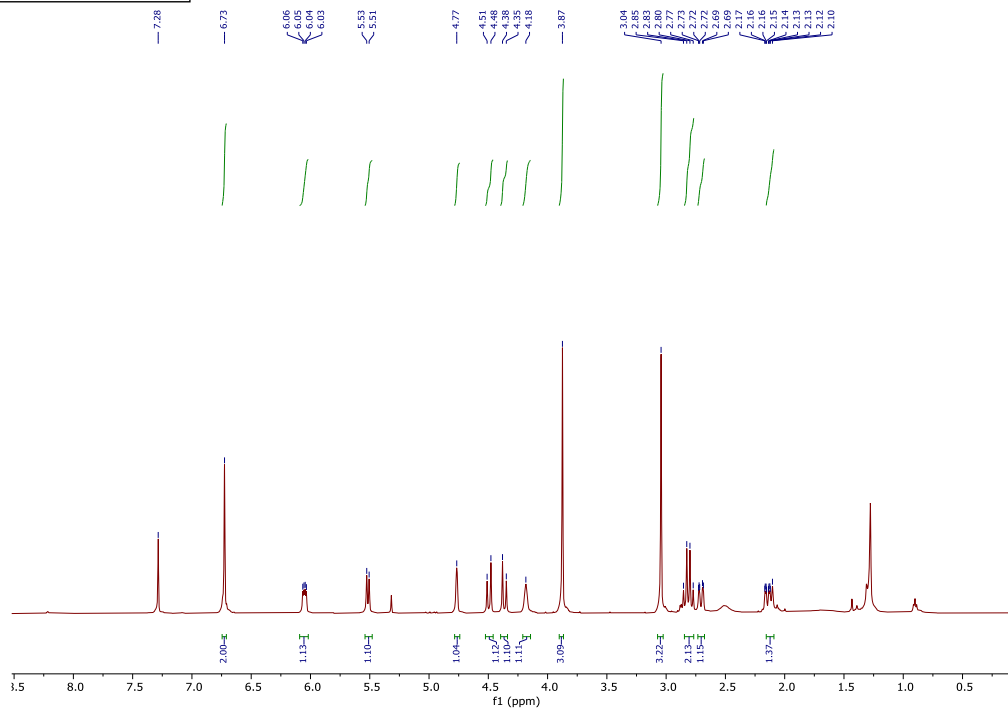

<sup>1</sup>H NMR (500 MHz, CDCl<sub>3</sub>) of (-)-**20**

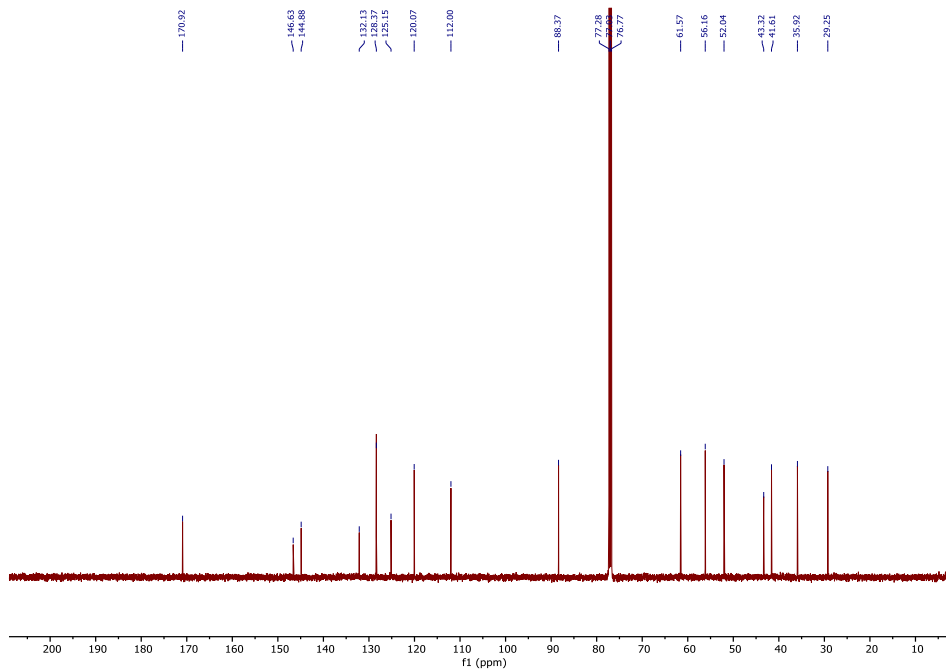

<sup>13</sup>C NMR (126 MHz, CDCl<sub>3</sub>) of (-)-**20**

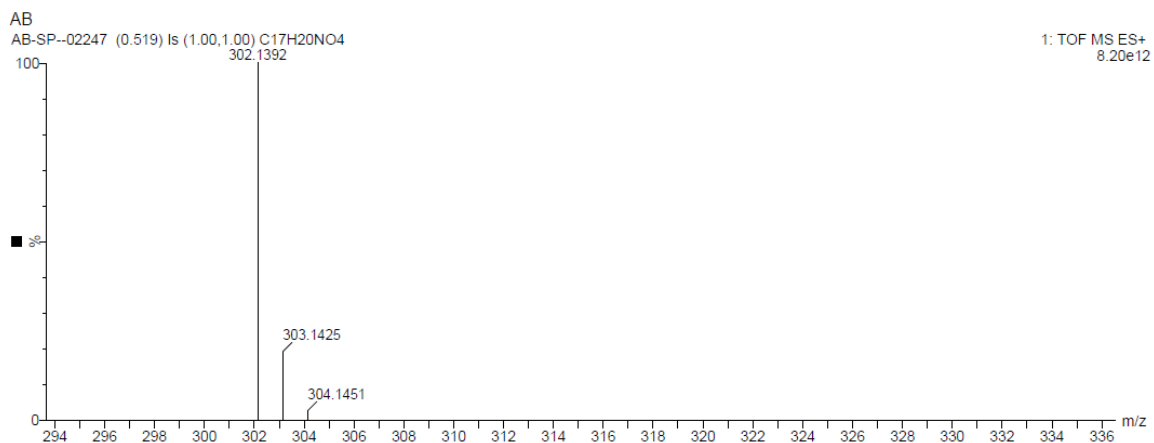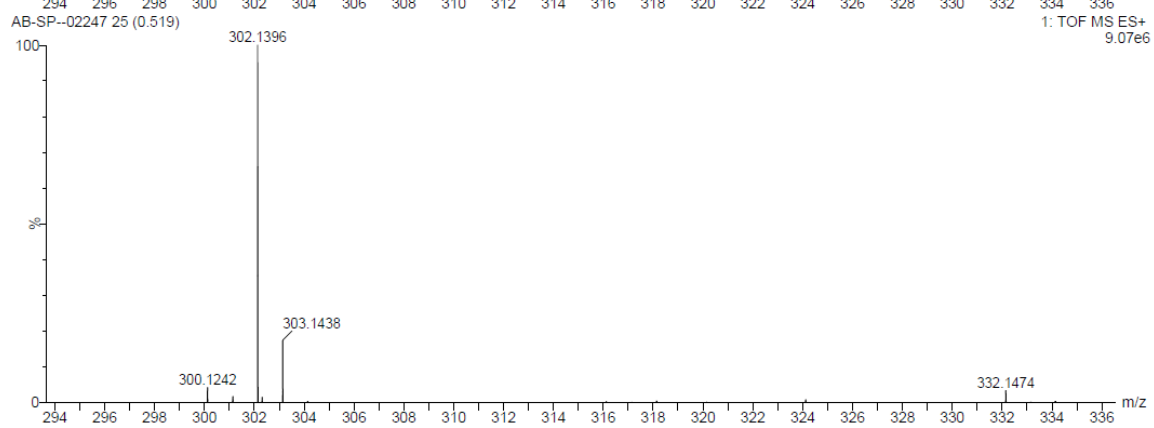

HRMS data of (-)-**20**

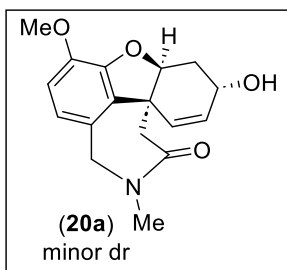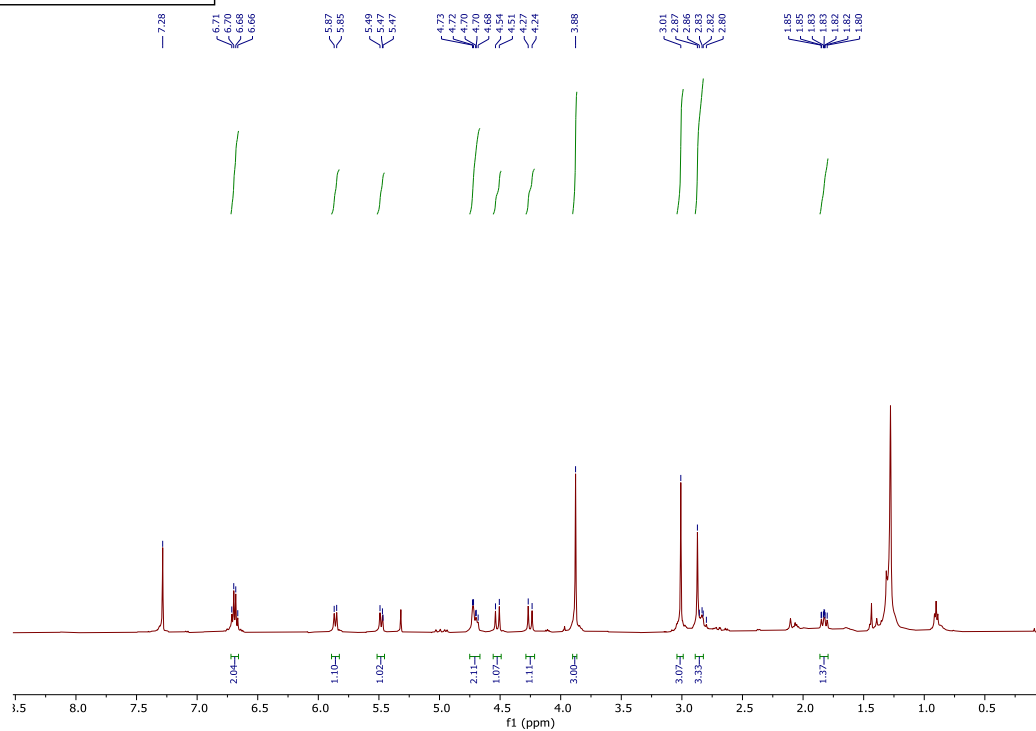

$^1\text{H}$  NMR (500 MHz,  $\text{CDCl}_3$ ) of **20a**

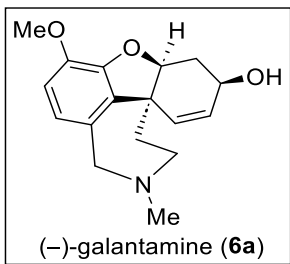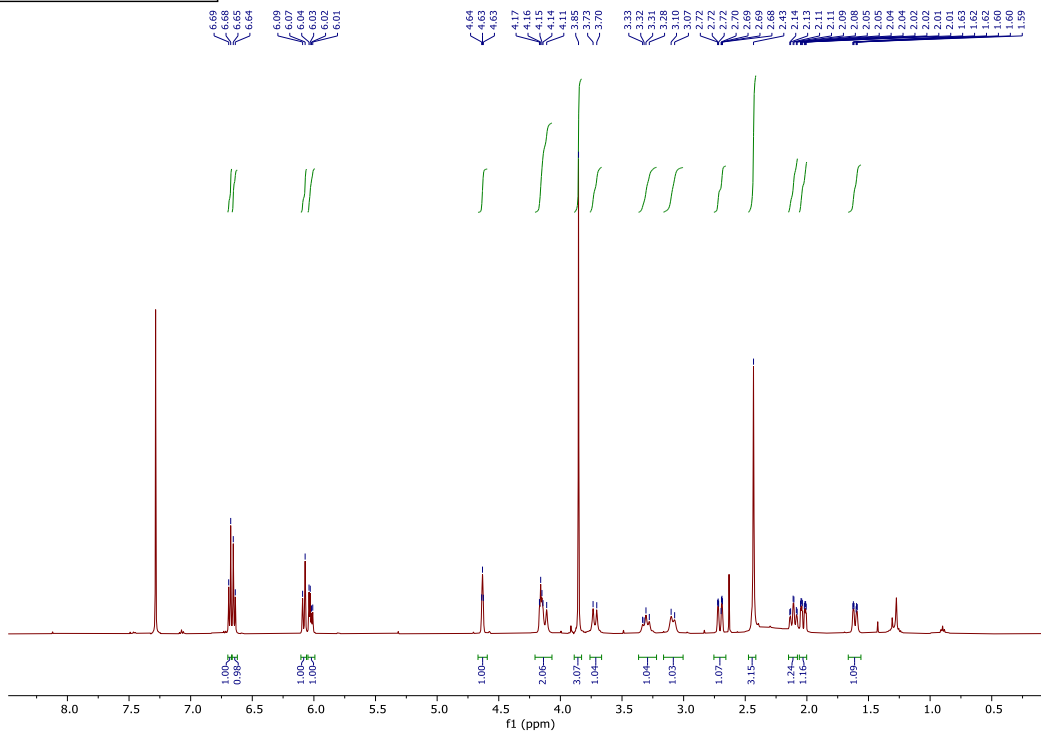

<sup>1</sup>H NMR (500 MHz, CDCl<sub>3</sub>) of (-)-6a

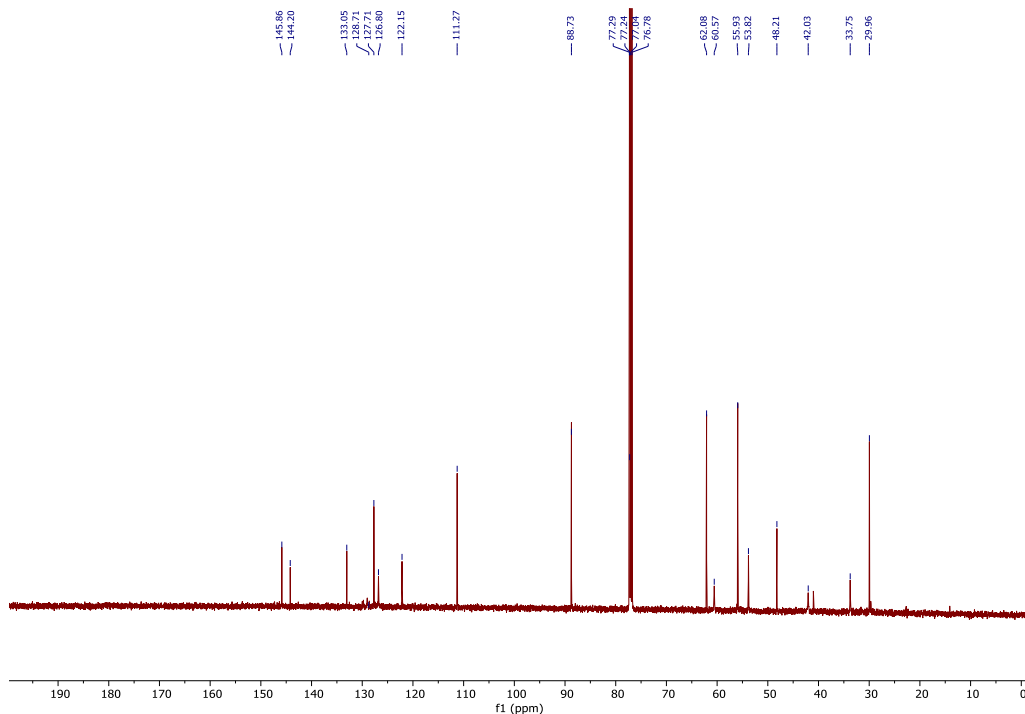

<sup>13</sup>C {<sup>1</sup>H} NMR (126 MHz, CDCl<sub>3</sub>) of (-)-6a

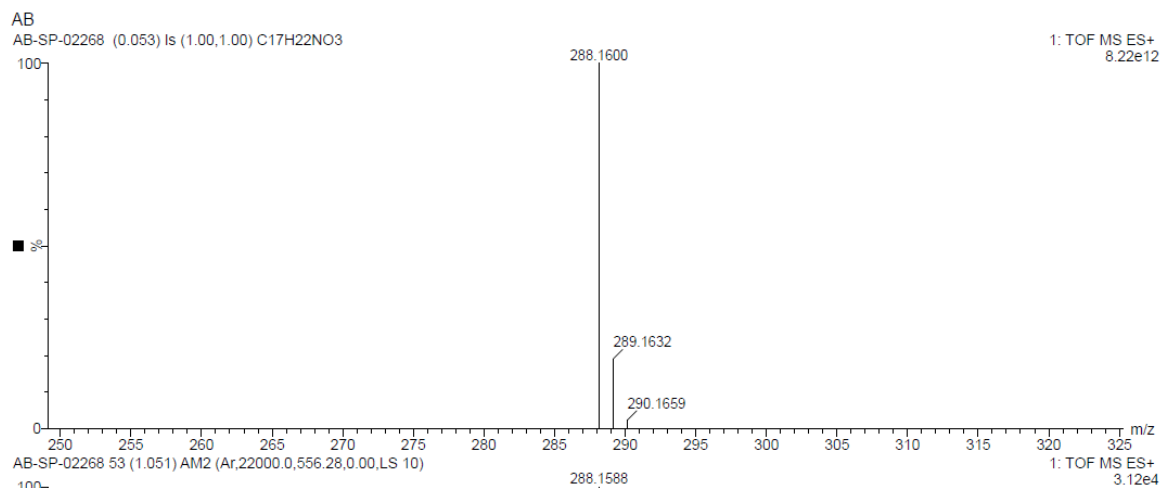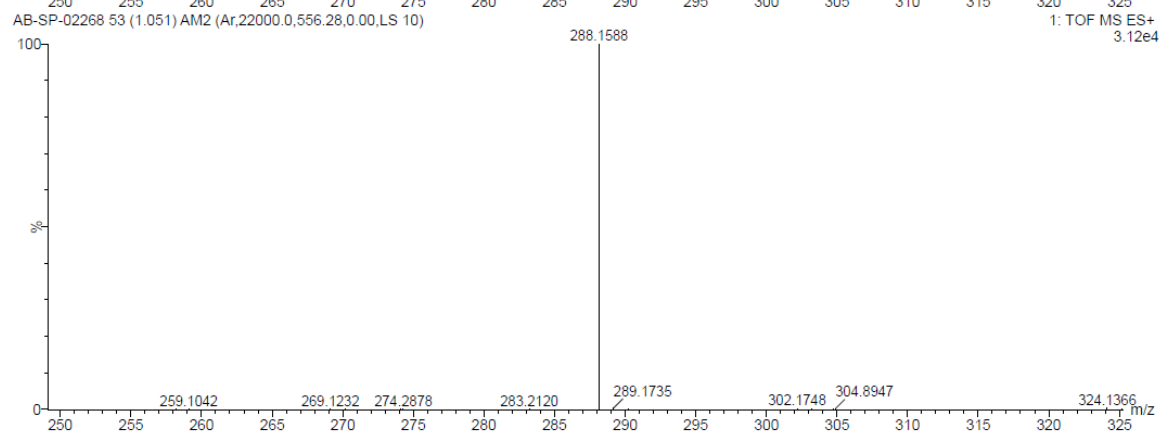

HRMS data of (-)-**6a**

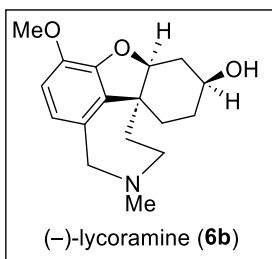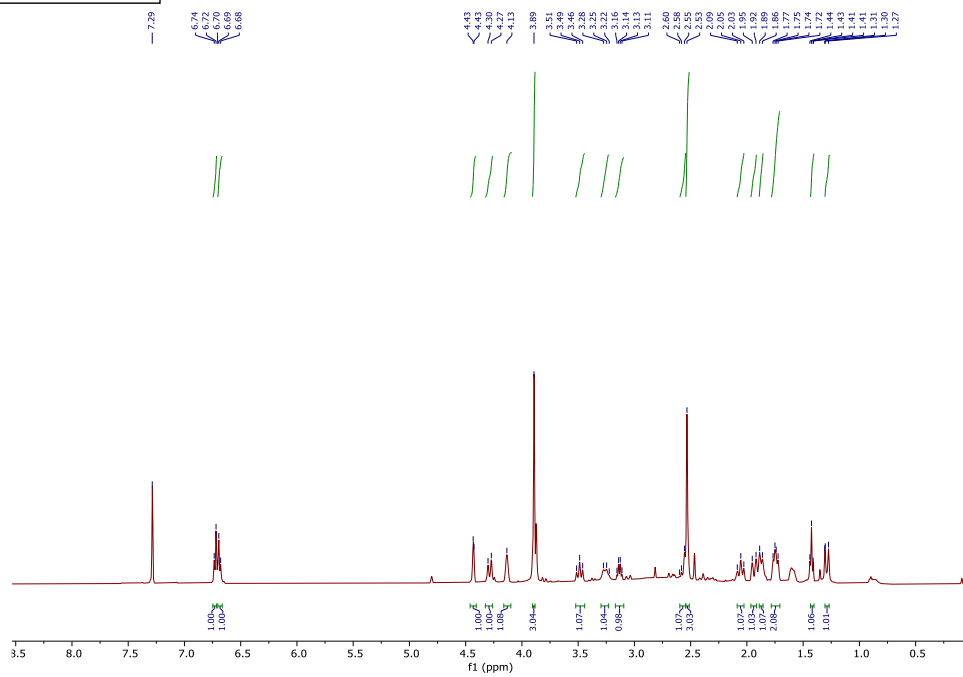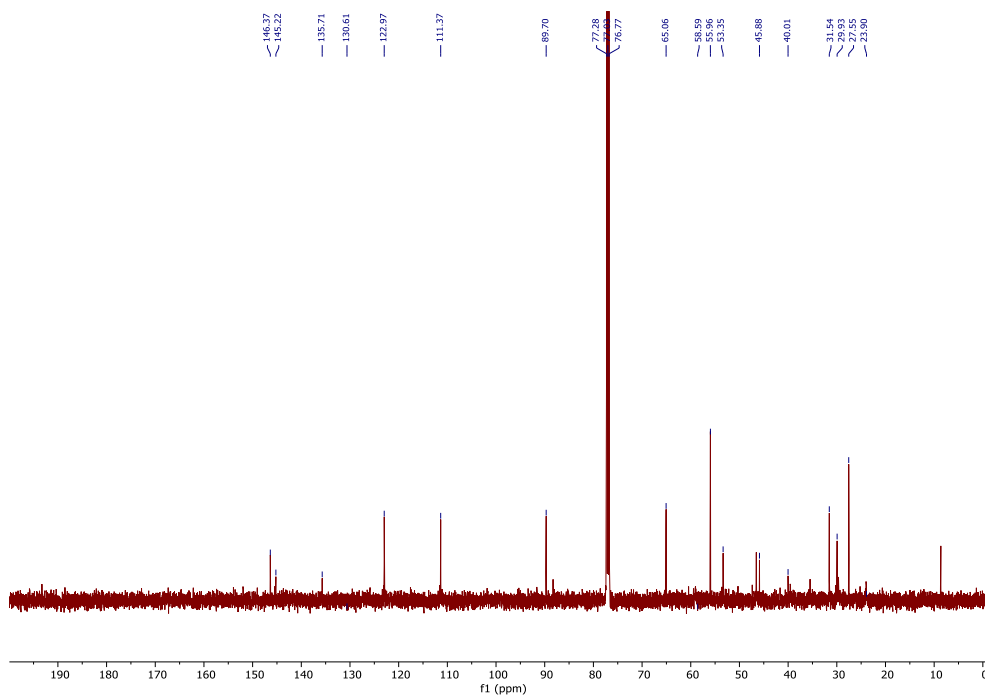

# Display Report

## Analysis Info

Analysis Name D:\Data\User data\2021\SEPT\AB\_SP\_02002.d  
Method Tune\_pos\_Standard.m  
Sample Name AB\_SP\_02002  
Comment

Acquisition Date 9/28/2021 12:58:43 PM

Operator IISER Kolkata  
Instrument maXis impact 8282001.00127

## Acquisition Parameter

|             |          |                      |          |                  |           |
|-------------|----------|----------------------|----------|------------------|-----------|
| Source Type | ESI      | Ion Polarity         | Positive | Set Nebulizer    | 0.5 Bar   |
| Focus       | Active   | Set Capillary        | 3400 V   | Set Dry Heater   | 200 °C    |
| Scan Begin  | 50 m/z   | Set End Plate Offset | -500 V   | Set Dry Gas      | 4.0 l/min |
| Scan End    | 1000 m/z | Set Charging Voltage | 2000 V   | Set Divert Valve | Source    |
|             |          | Set Corona           | 0 nA     | Set APCI Heater  | 0 °C      |

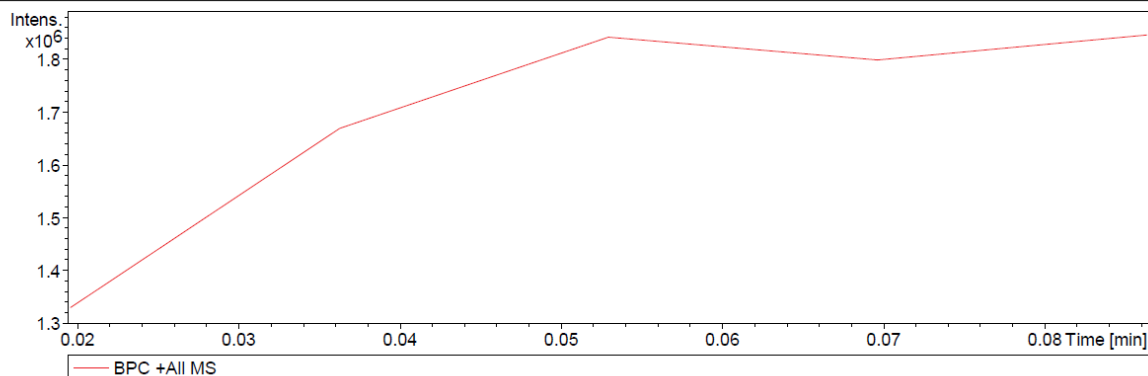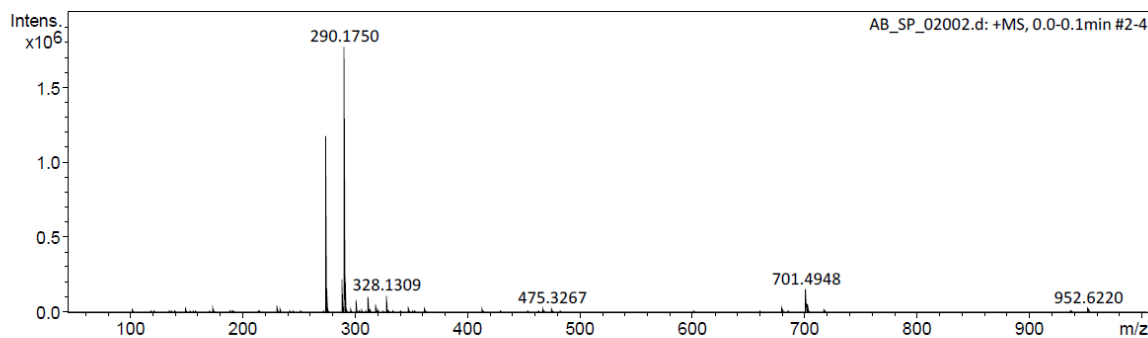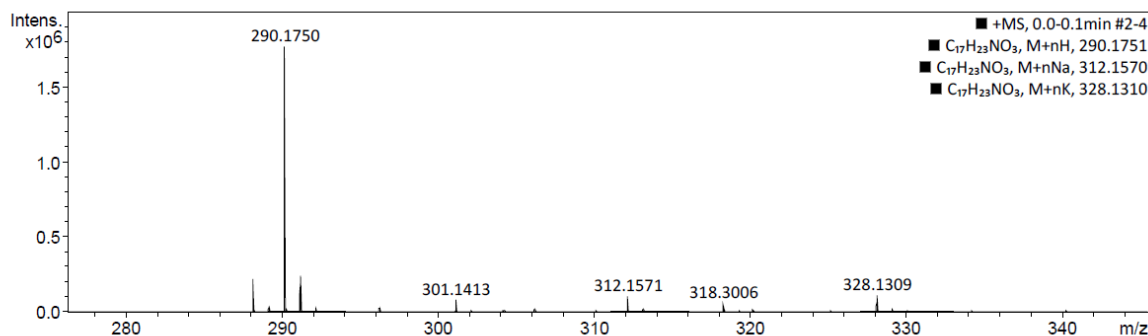

AB\_SP\_02002.d

Bruker Compass DataAnalysis 4.1

printed: 9/28/2021 1:01:57 PM

by: IISER Kolkata

Page 1 of 1

HRMS data of (-)-**6b**

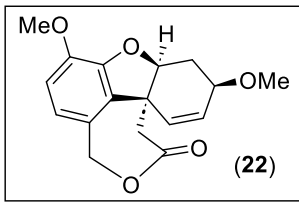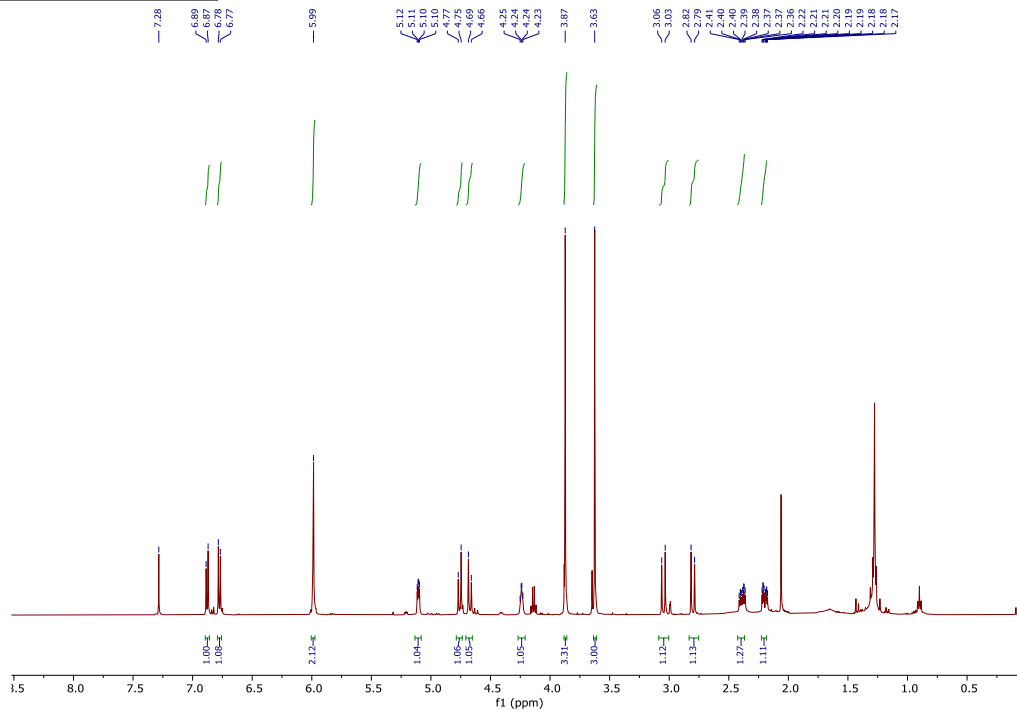

$^1\text{H}$  NMR (500 MHz,  $\text{CDCl}_3$ ) of (-)-22

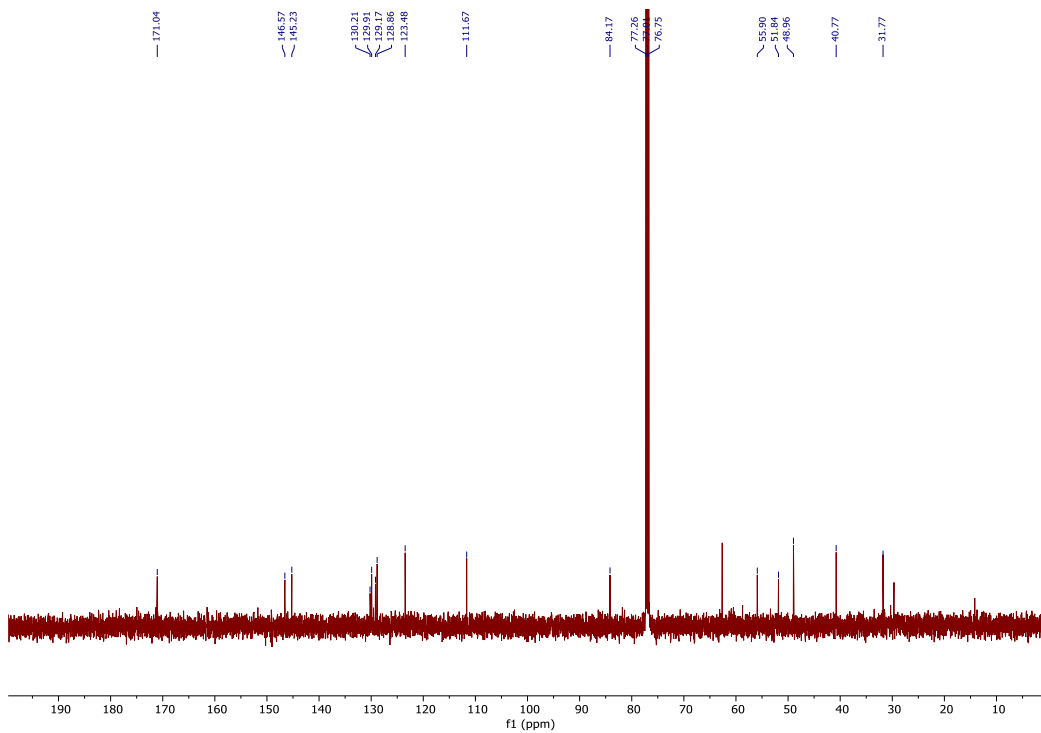

$^{13}\text{C}$   $\{^1\text{H}\}$  NMR (126 MHz,  $\text{CDCl}_3$ ) of (-)-22



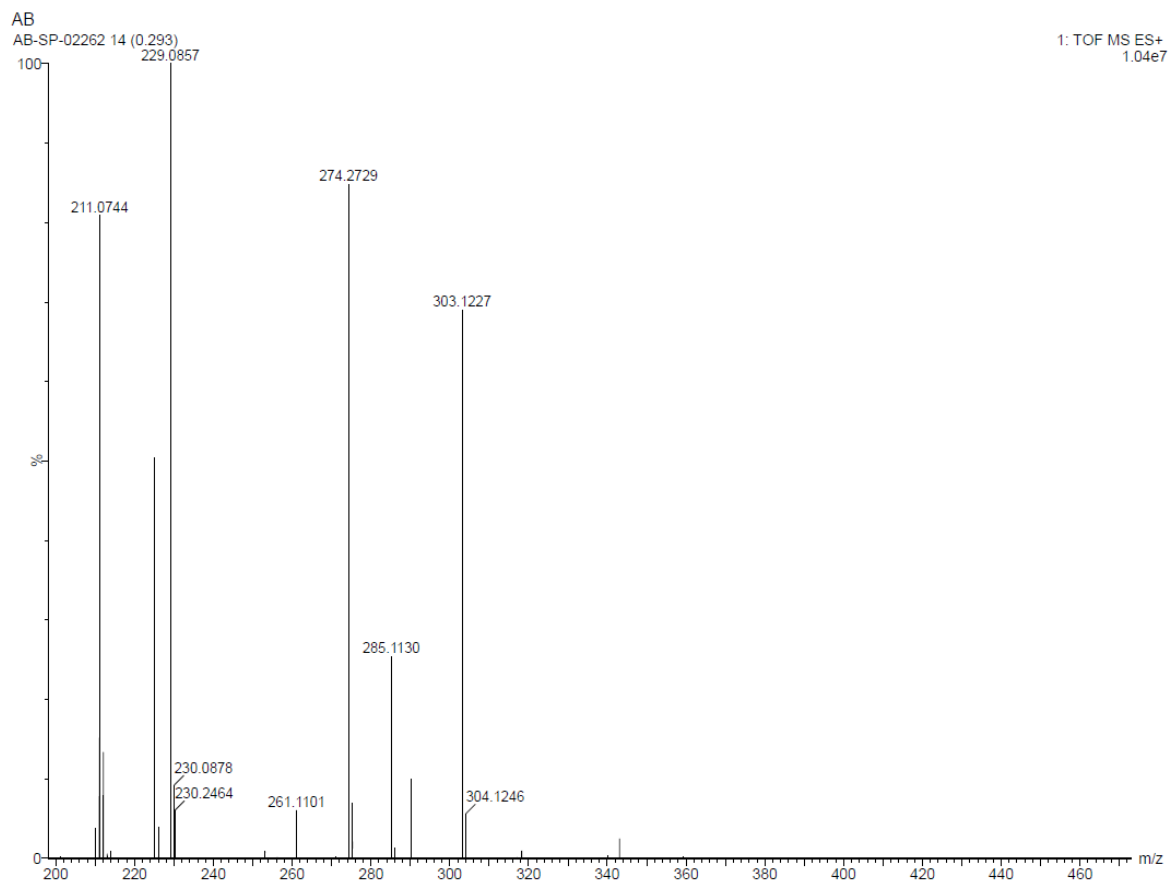

HRMS data of (-)-22

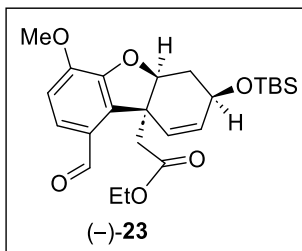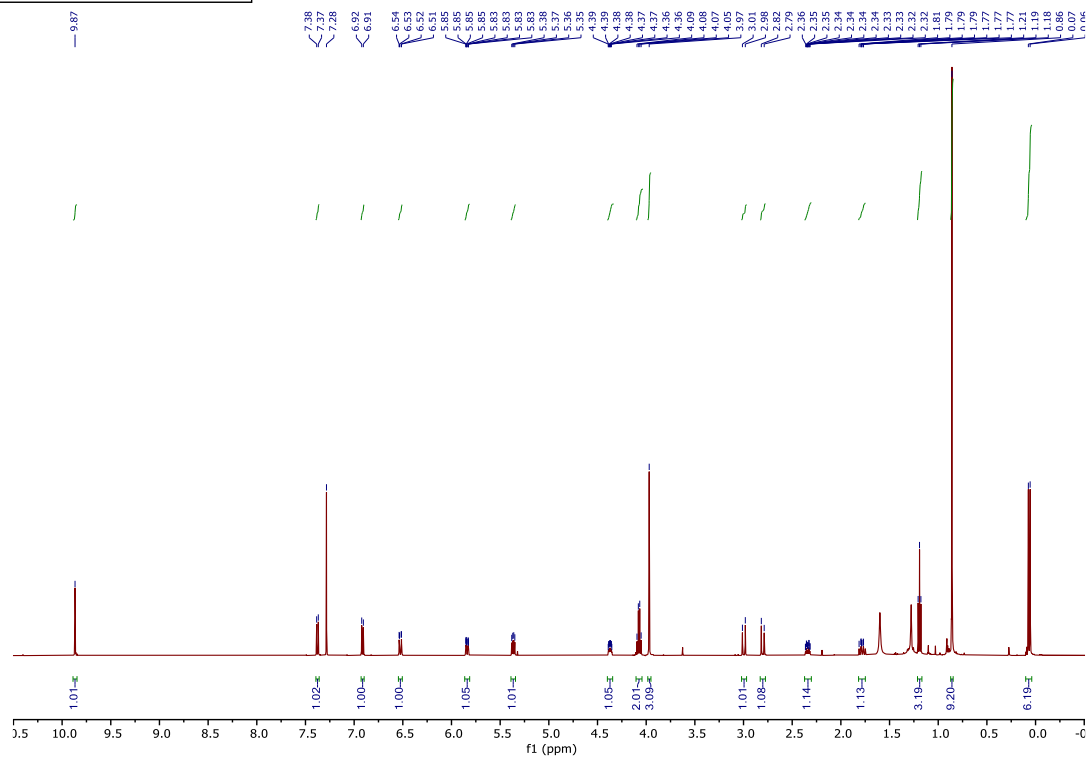

$^1\text{H}$  NMR (500 MHz,  $\text{CDCl}_3$ ) of **(-)-23**

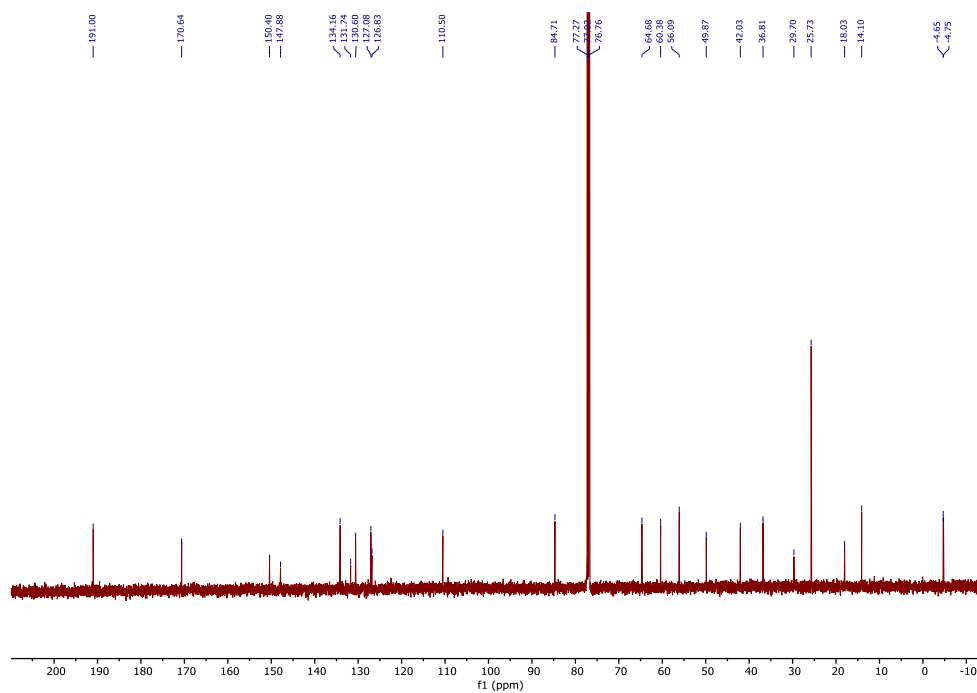

$^{13}\text{C}$   $\{^1\text{H}\}$  NMR (126 MHz,  $\text{CDCl}_3$ ) of **(-)-23**

AB07-Nov-2023 12:43:40

AB-SP-02340 (0.053) Is (1.00,1.00) C<sub>24</sub>H<sub>34</sub>O<sub>6</sub>SiNa

IISER - KOLKATA

1: TOF MS ES+  
6.99e12

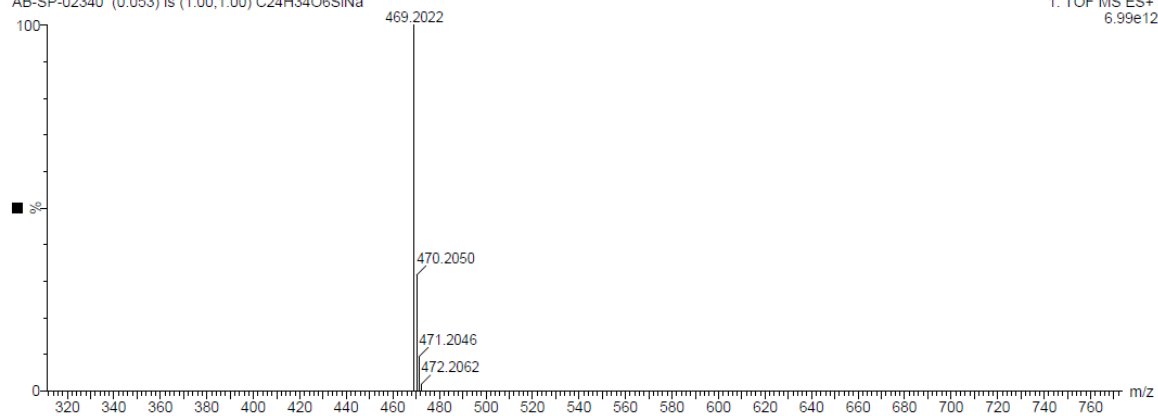

AB-SP-02340 98 (1.931) AM2 (Ar,22000.0,556.28,0.00,LS 10); ABS

1: TOF MS ES+  
1.01e7

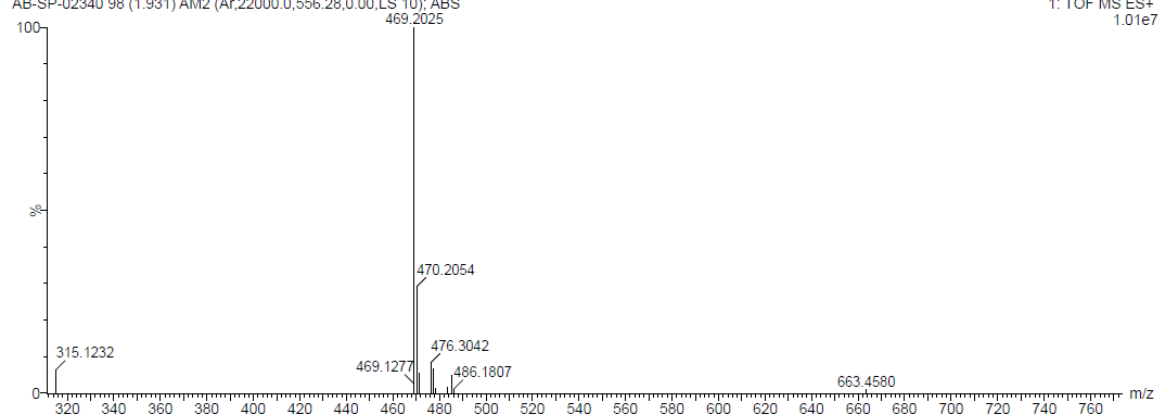

HRMS data of (-)-**23**

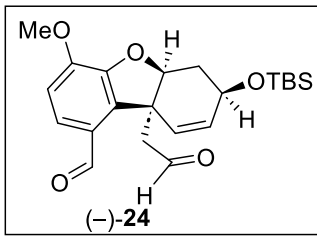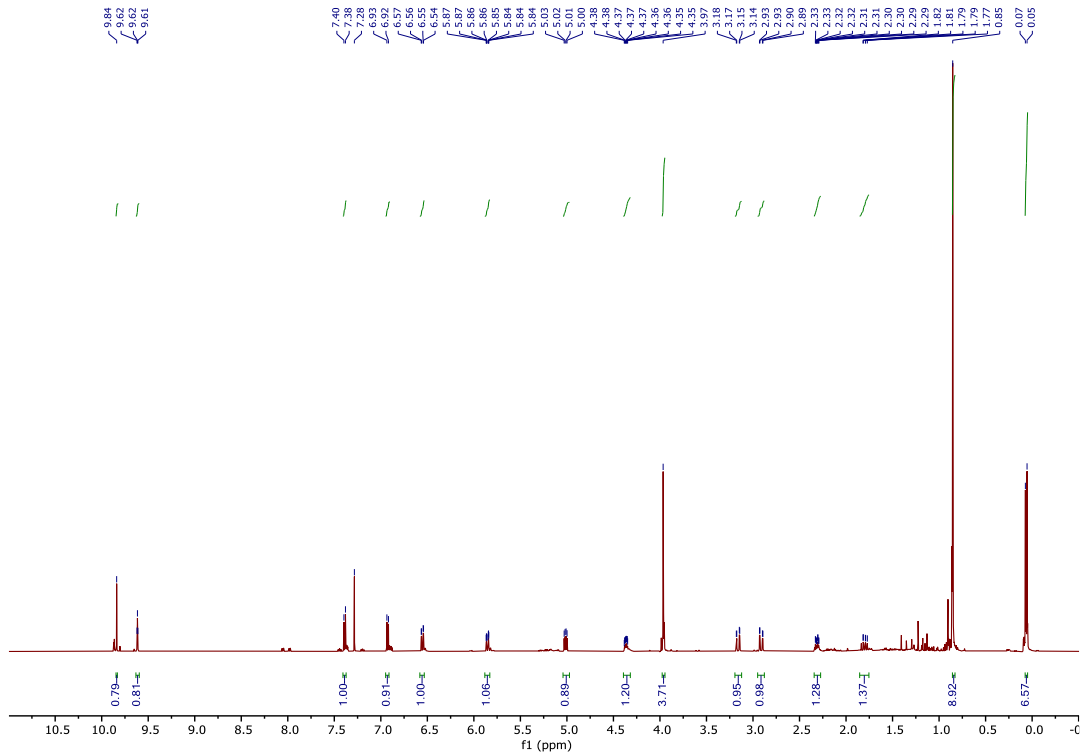

$^1\text{H}$  NMR (500 MHz,  $\text{CDCl}_3$ ) of (-)-24

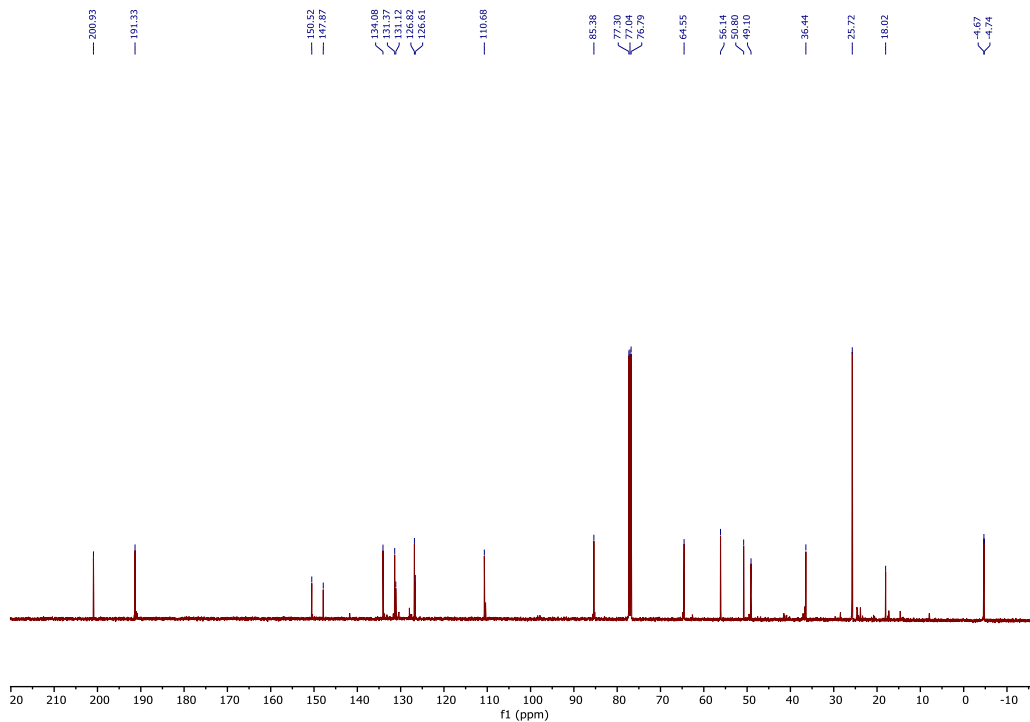

$^{13}\text{C}$  { $^1\text{H}$ } NMR (126 MHz,  $\text{CDCl}_3$ ) of (-)-24

AB07-Nov-2023 12:48:17

IISER - KOLKATA

1: TOF MS ES+  
7.17e12

AB-SP-02342 (0.053) Is (1.00,1.00) C22H30O5SiNa

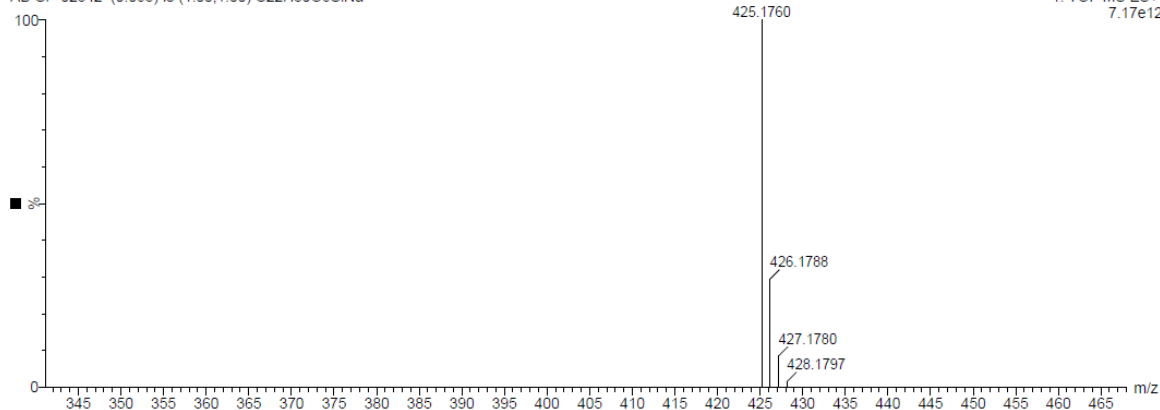

AB-SP-02342 66 (1.311) AM2 (Ar,22000.0,556.26,0.00,LS 10); ABS

1: TOF MS ES+  
1.00e6

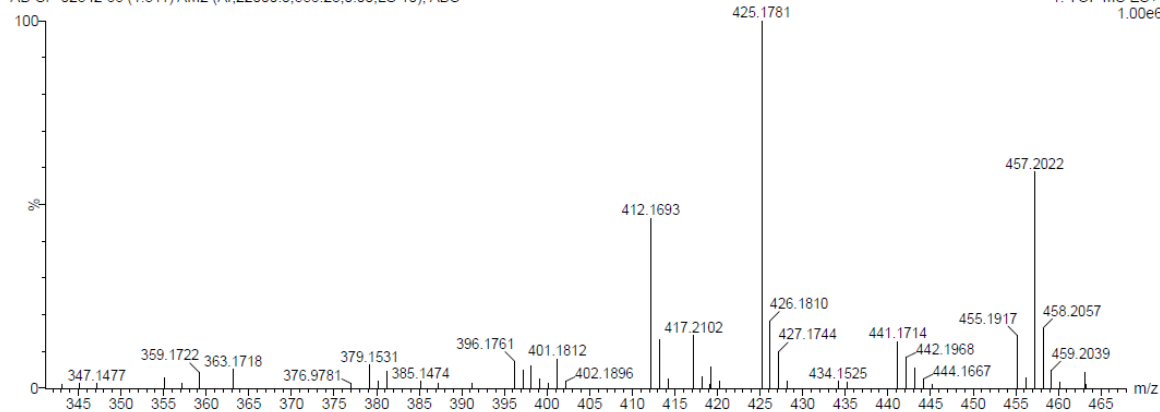

HRMS data of (-)-24

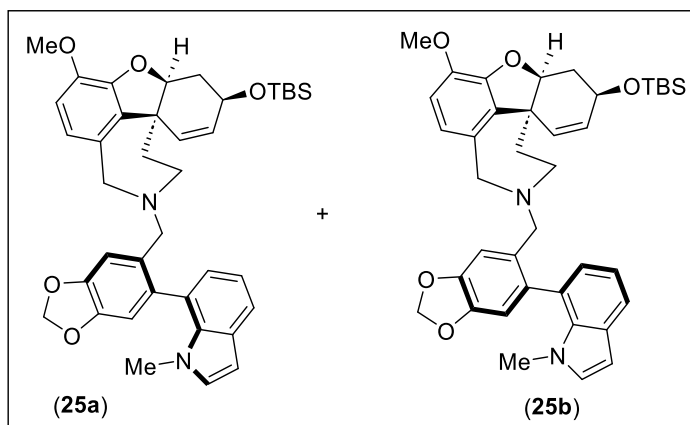

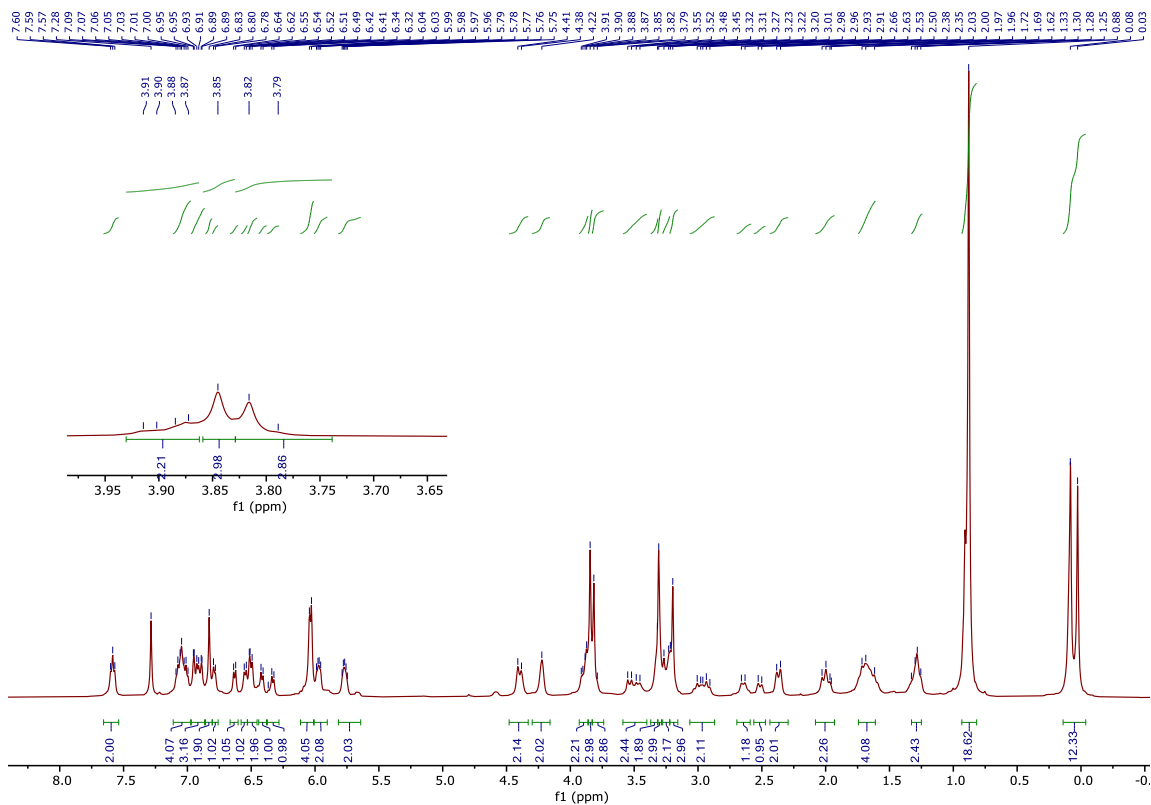

<sup>1</sup>H NMR (500 MHz, CDCl<sub>3</sub>) of compound (25a and 25b)

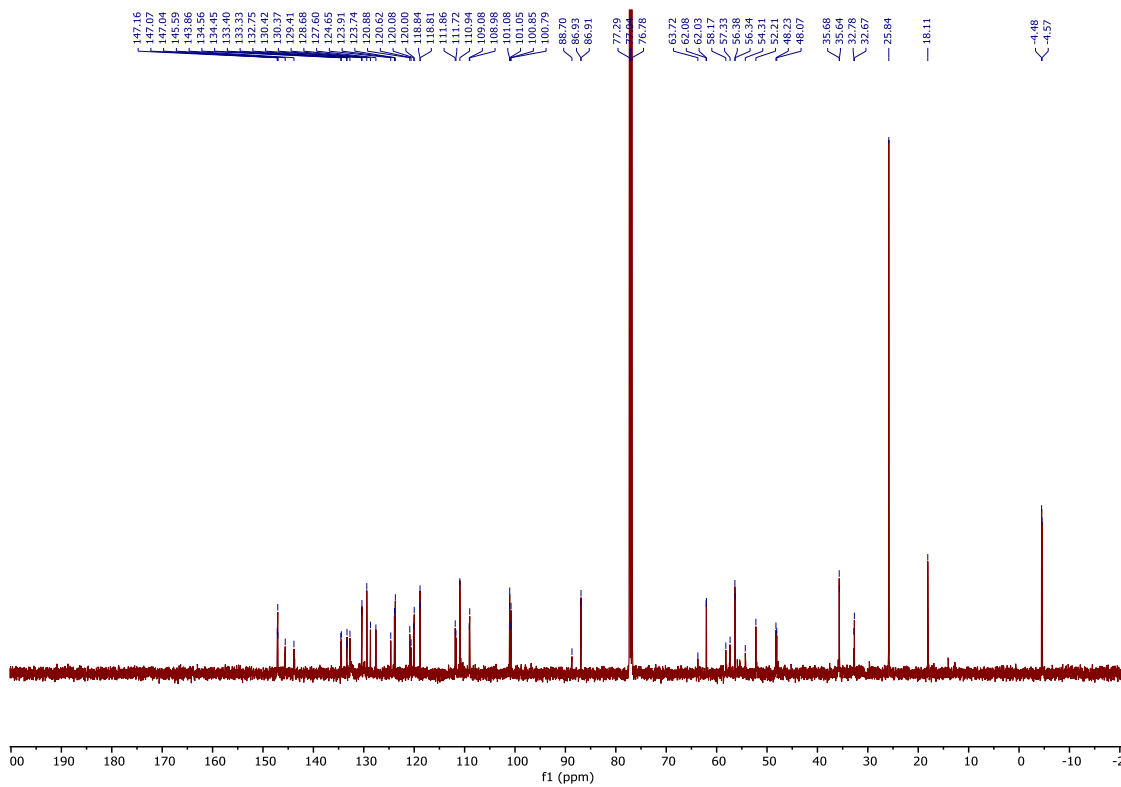

<sup>13</sup>C {<sup>1</sup>H} NMR (126 MHz, CDCl<sub>3</sub>) of Compound (25a and 25b)

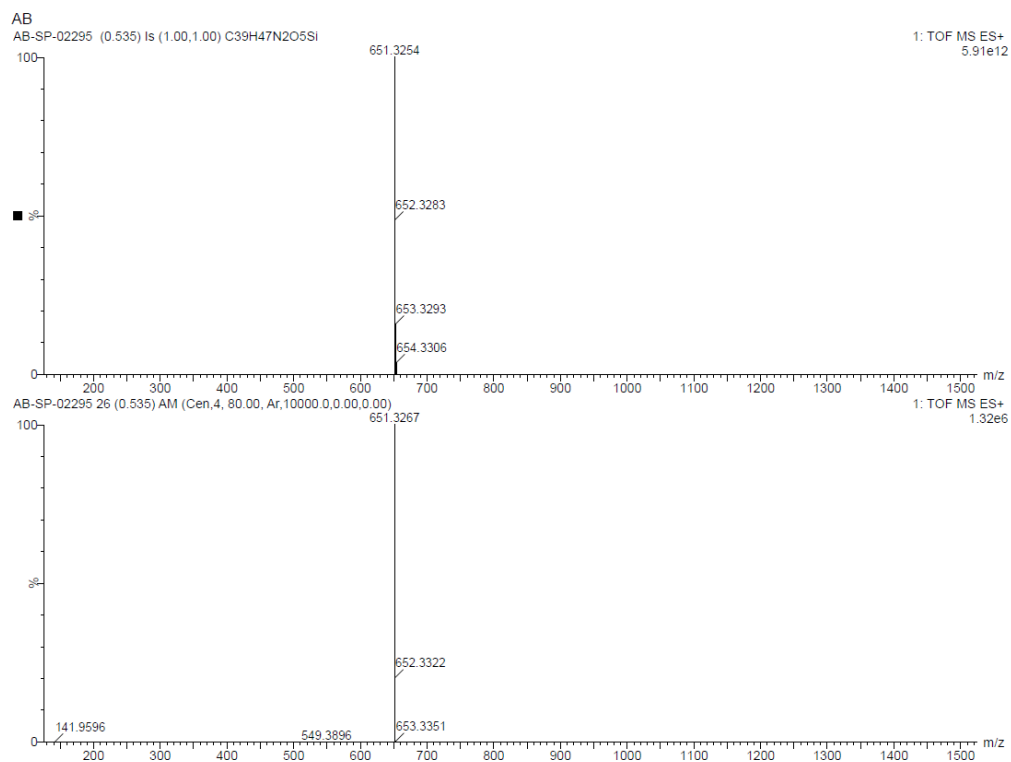

HRMS data of (-)-**25**

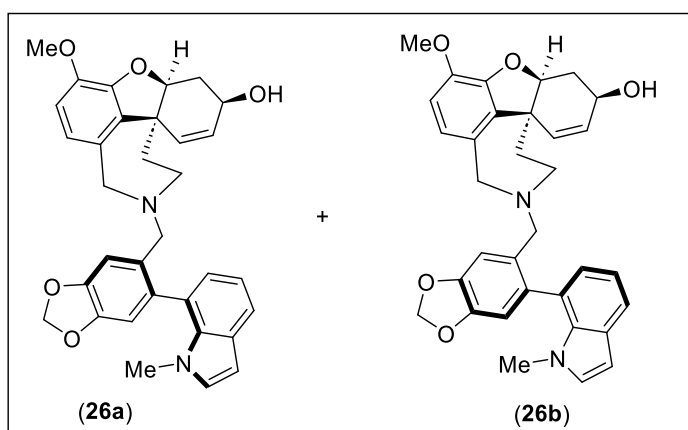

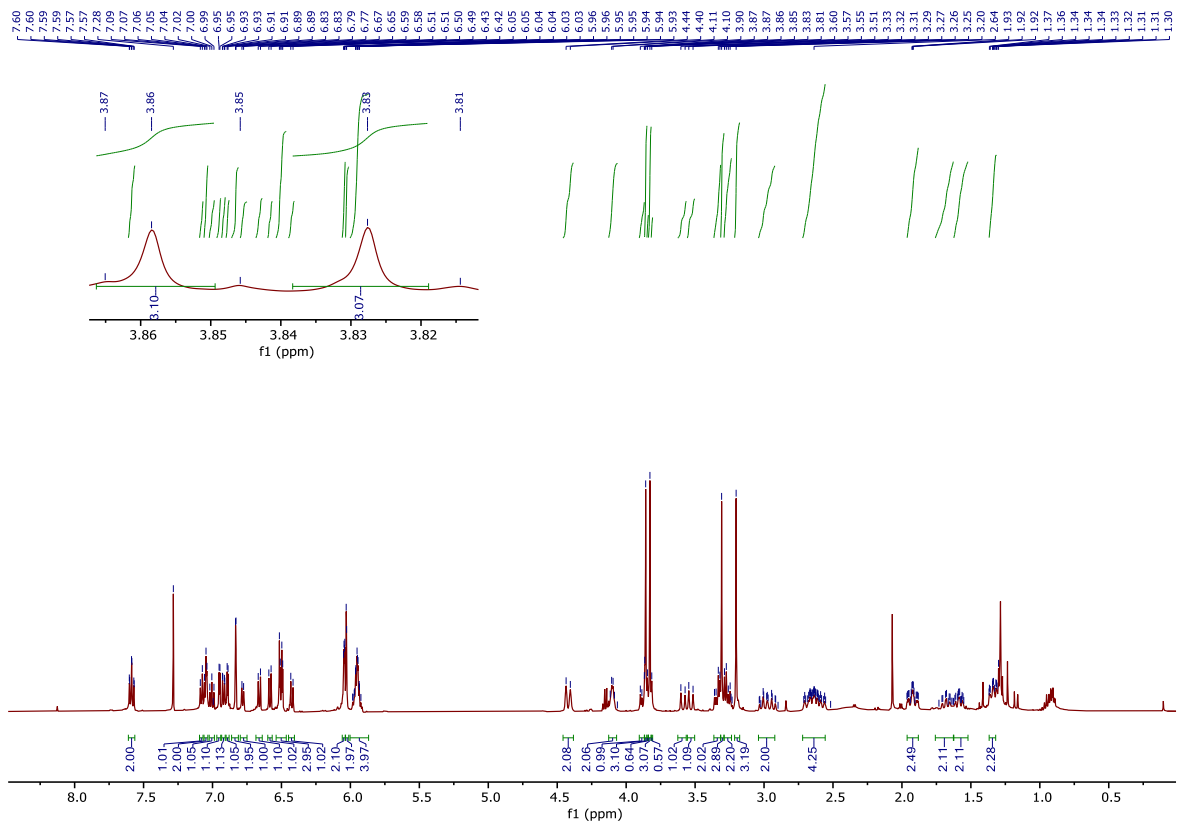

$^1\text{H}$  NMR (500 MHz,  $\text{CDCl}_3$ ) of (-)-dehydro narcipavline (**26a** and **26b**)

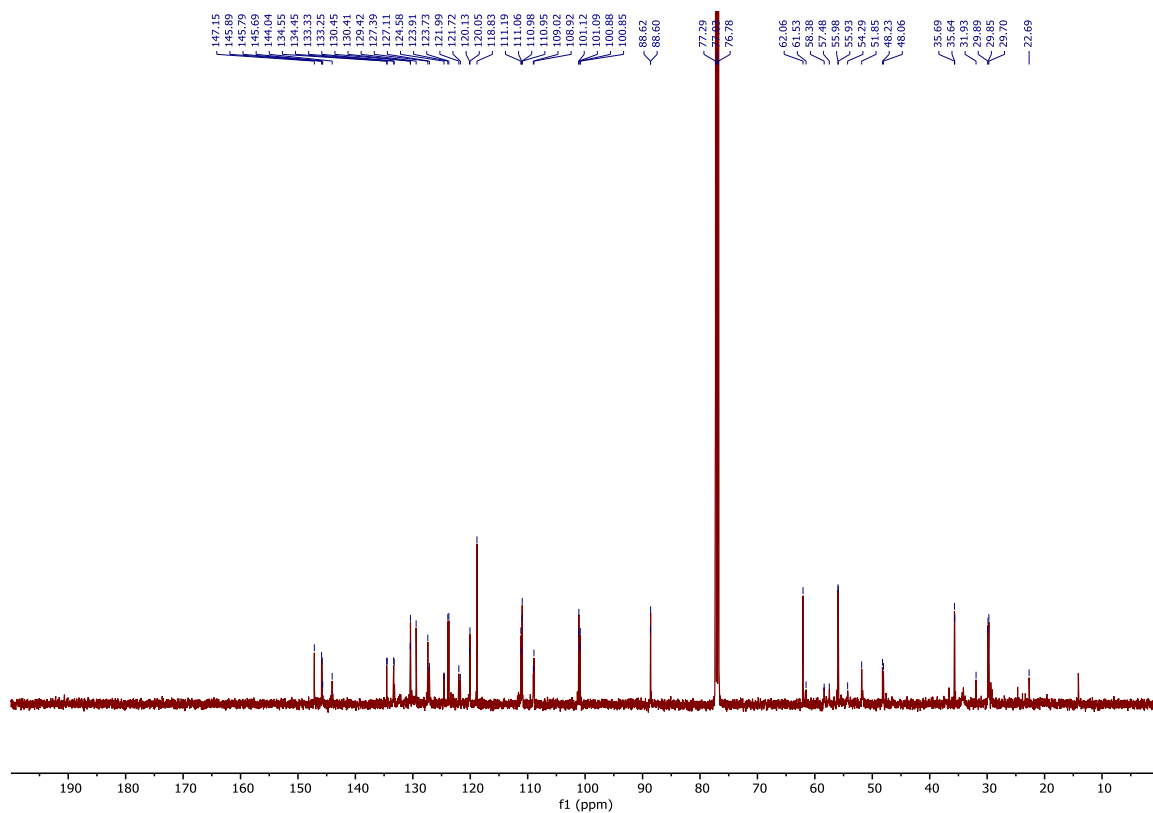

$^{13}\text{C}$   $\{^1\text{H}\}$  NMR (126 MHz,  $\text{CDCl}_3$ ) of (-)-dehydro narcipavline (**26a** and **26b**)



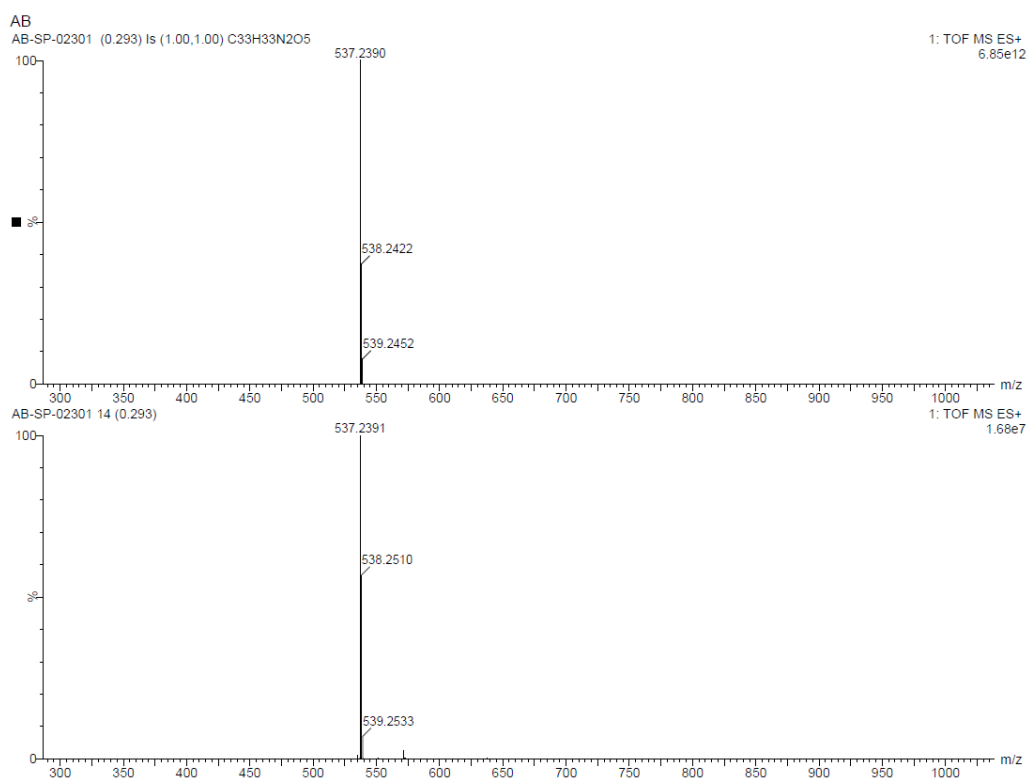

HRMS data of dehydro-Narcipavline (-)-**26**

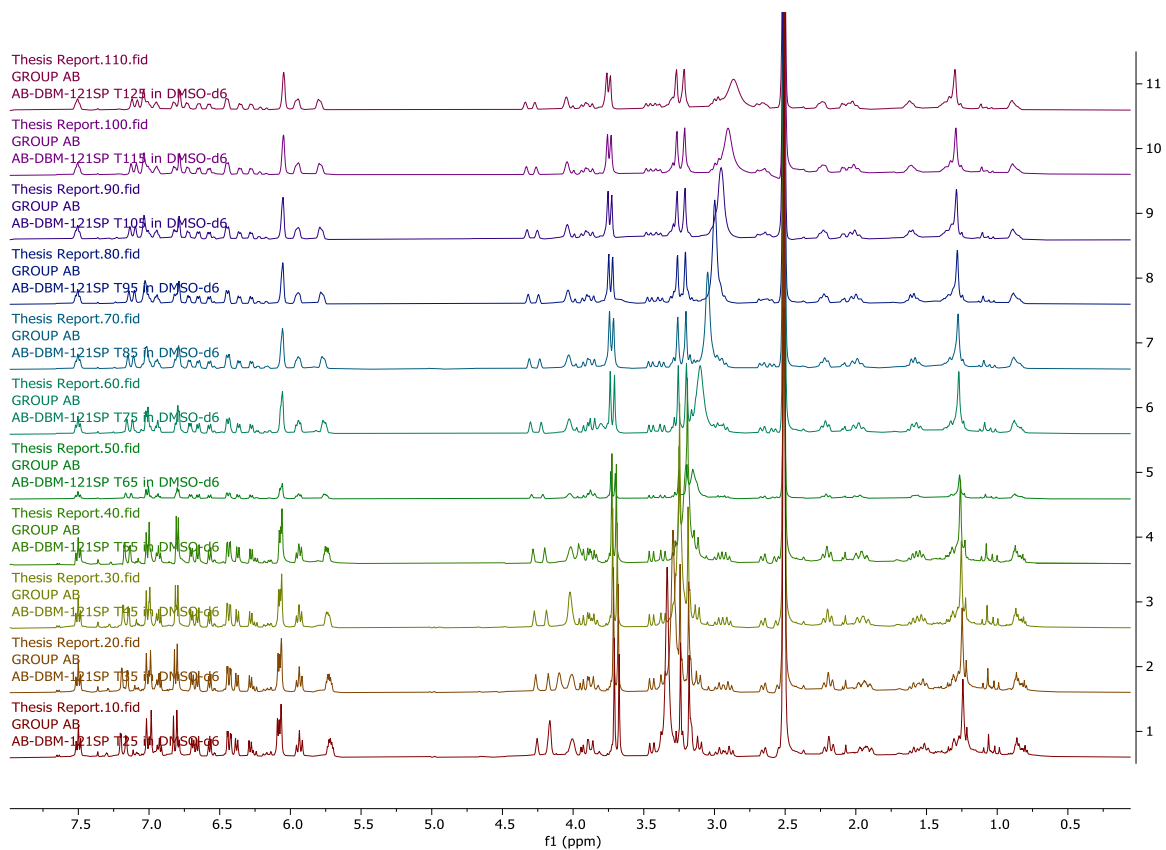

VT experiment spectrum of dehydronarcipavline **[26]** at 298k, 308k, 318k, 328k, 338k, 348k, 358k, 368k, 378k, 388k, 398k in DMSO-d<sub>6</sub> solvent (500 MHz)

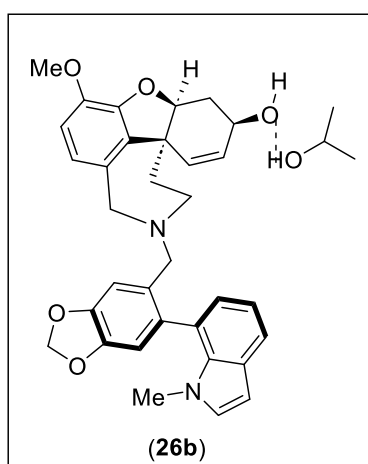

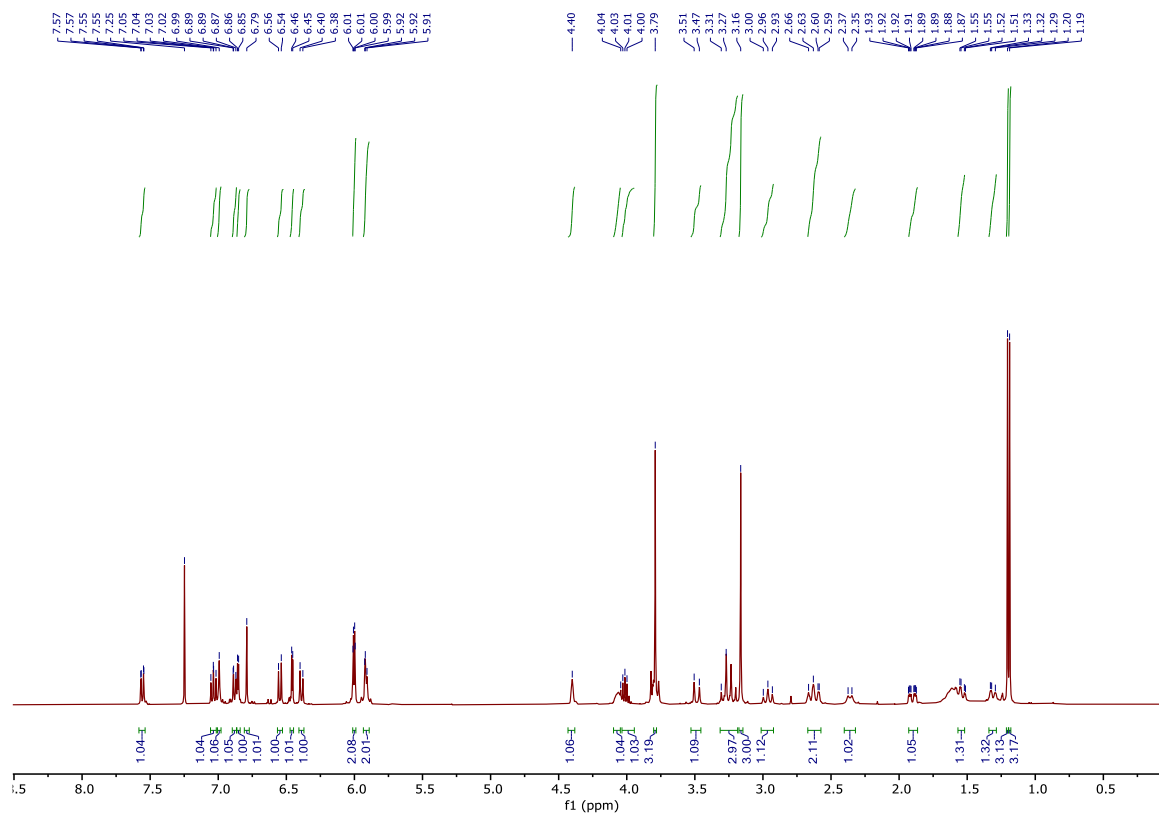

$^1\text{H}$  NMR (500 MHz,  $\text{CDCl}_3$ ) of ( $\pm$ )-dehydro narcipavline (**26b**) [Racemic crystal]

After 24 h

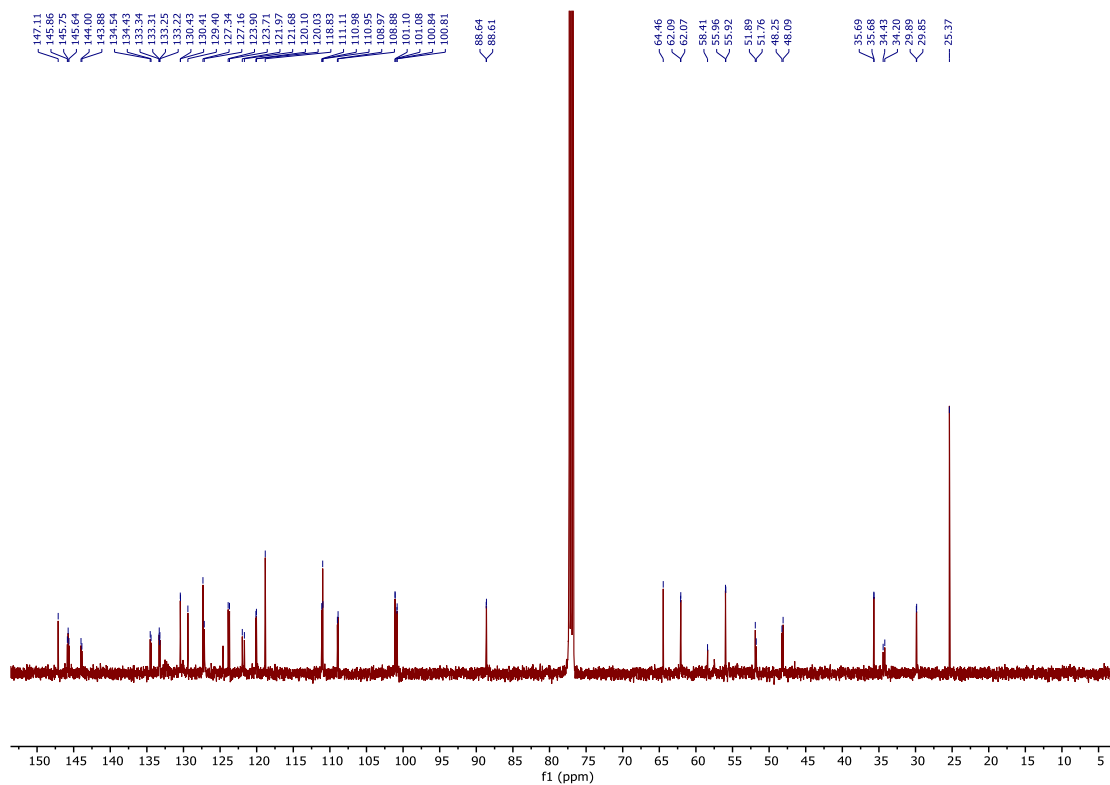

$^{13}\text{C}$   $\{^1\text{H}\}$  NMR (126 MHz,  $\text{CDCl}_3$ ) of (-)-dehydro narcipavline (**26b**) after 24 h of recording the  $^1\text{H}$  NMR (500 MHz,  $\text{CDCl}_3$ ) [Racemic crystal]

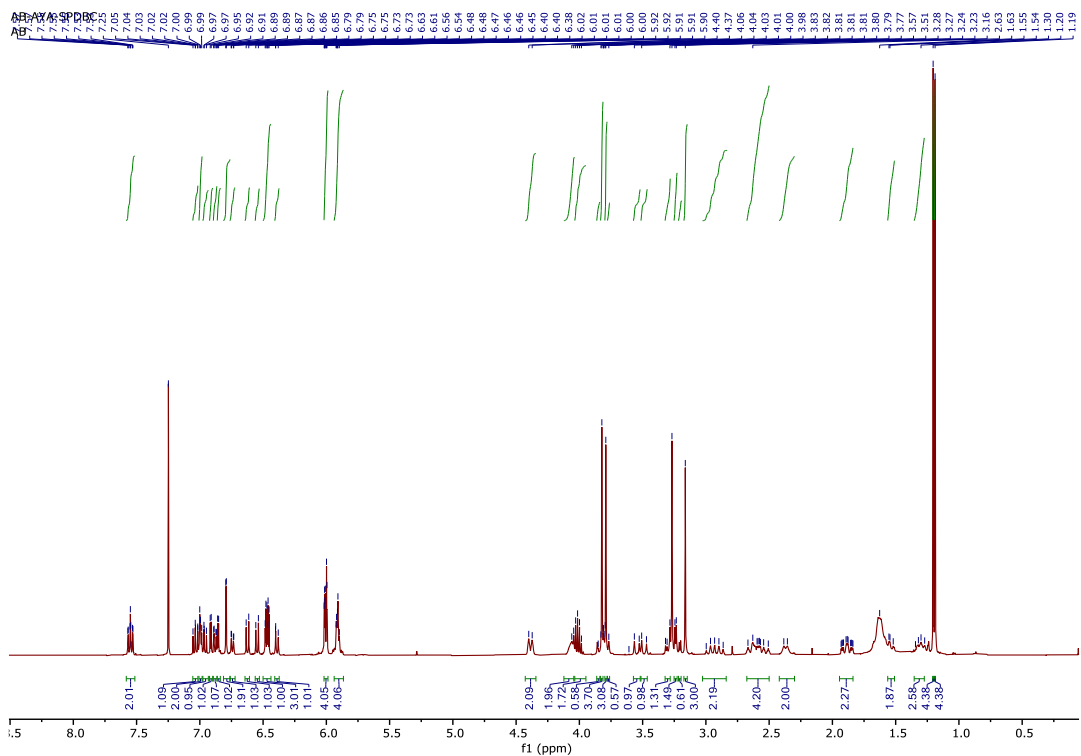

$^1\text{H}$  NMR spectra of ( $\pm$ )-dehydro narcipavline (**26b**) after 24 h in  $\text{CDCl}_3$  showed  $\sim 1:1$  diastereomeric mixtures

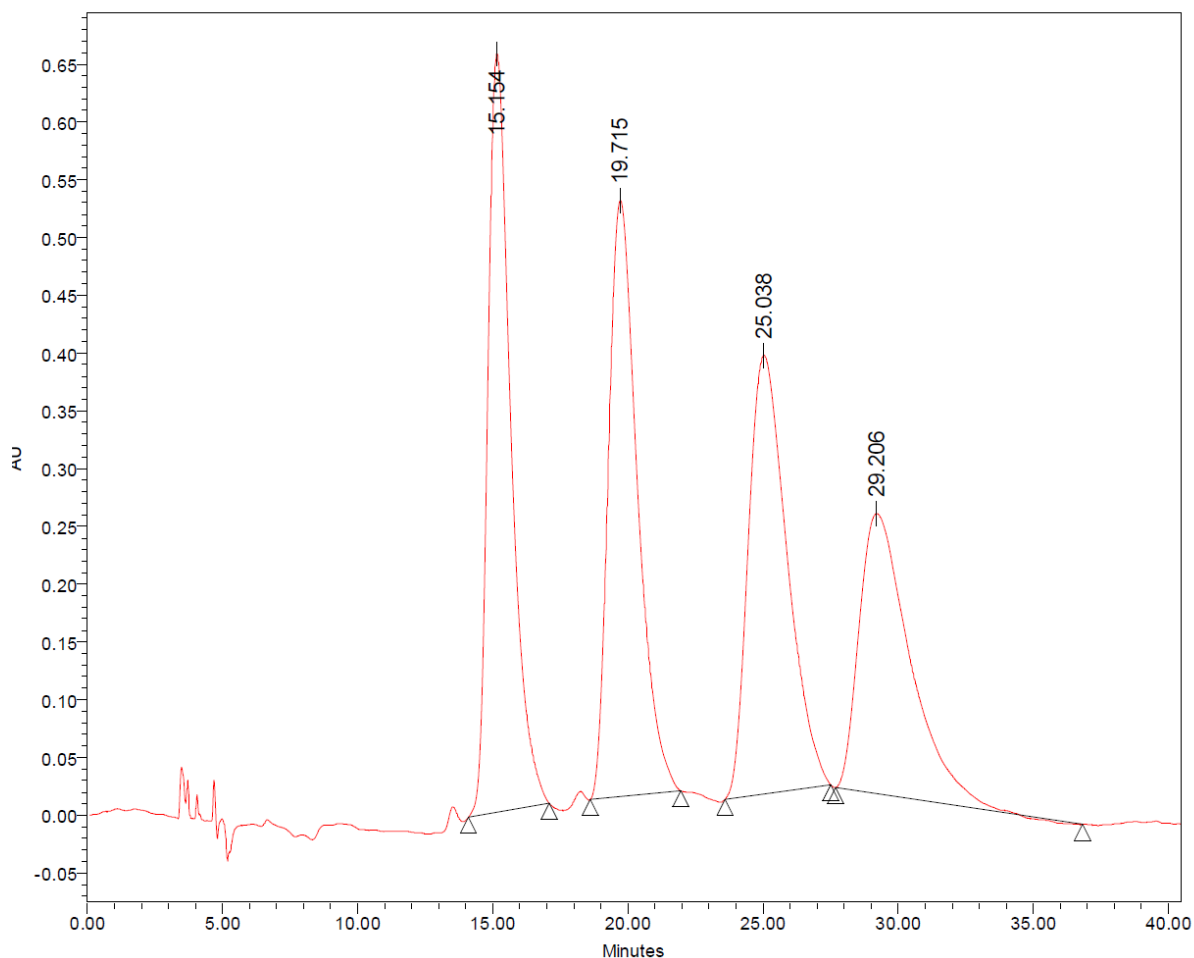

Sample Name: AB-SP-02DEHNPV-OD-H-30-01-RAC1; Date Acquired: 05-10-2024 15:18:03 IST; Vial: 1:A,1; Injection: 1

Peak Summary with Statistics  
Name:

|   | Sample Name                    | Vial  | Inj | Retention Time (min) | Area     | % Area | Height |
|---|--------------------------------|-------|-----|----------------------|----------|--------|--------|
| 1 | AB-SP-02DEHNPV-OD-H-30-01-RAC1 | 1:A,1 | 1   | 15.154               | 38594942 | 26.31  | 656546 |
| 2 | AB-SP-02DEHNPV-OD-H-30-01-RAC1 | 1:A,1 | 1   | 29.206               | 32092897 | 21.88  | 242586 |
| 3 | AB-SP-02DEHNPV-OD-H-30-01-RAC1 | 1:A,1 | 1   | 25.038               | 37554722 | 25.60  | 379346 |
| 4 | AB-SP-02DEHNPV-OD-H-30-01-RAC1 | 1:A,1 | 1   | 19.715               | 38440678 | 26.21  | 515965 |

Reported by User: System  
Report Method: Peak Summary Report  
Report Method ID: 2585  
Page: 1 of 2

Project Name: AB Research Group  
Date Printed: 05-10-2024  
16:10:28 Asia/Kolkata

HPLC data of ( $\pm$ )-**26** (diastereomeric mixtures)

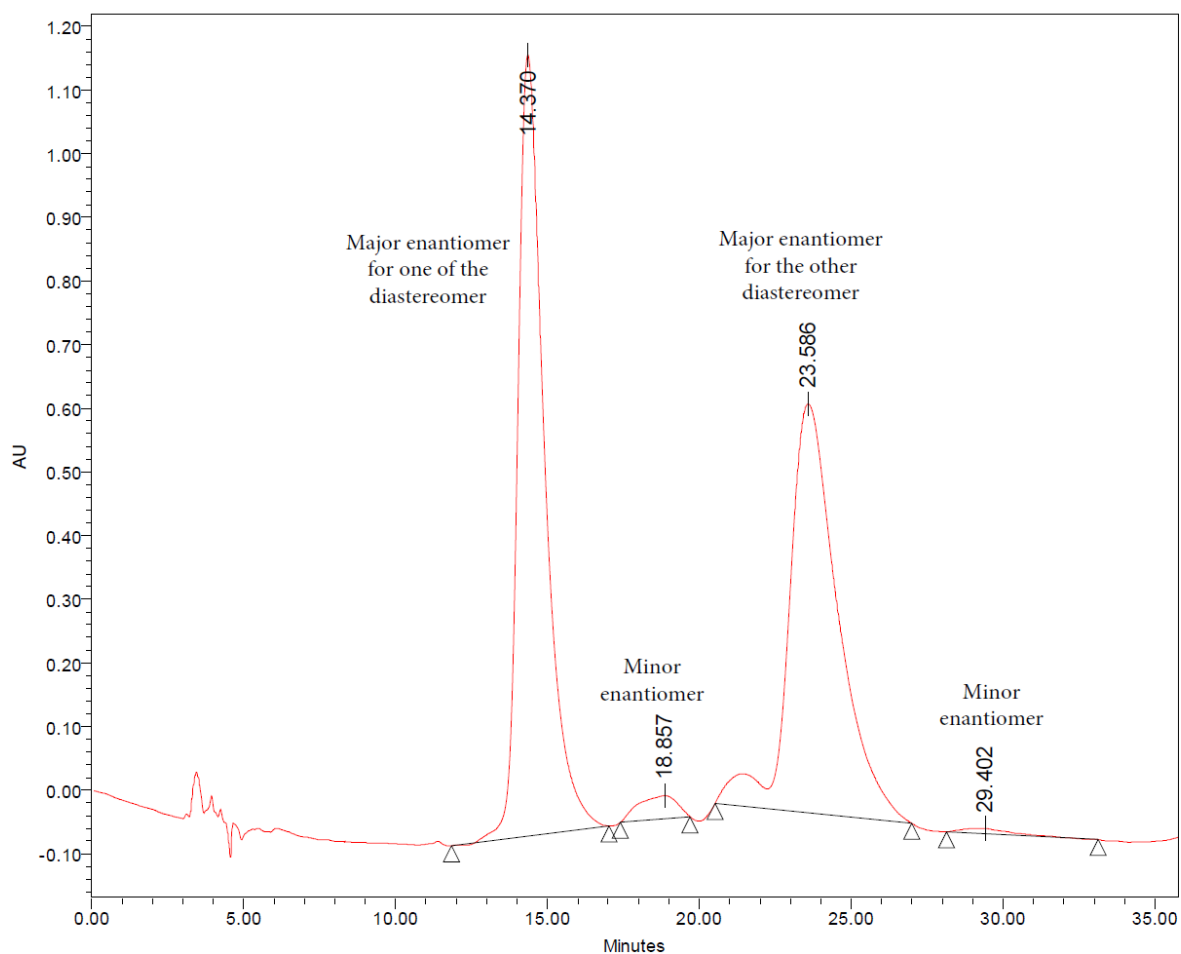

Sample Name: AB-SP-02dhnvpv\_OD-H-30-01-CHI\_RE; Date Acquired: 07-10-2024 18:31:31 IST; Vial: 1:A,1; Injection: 1

Peak Summary with Statistics  
Name:

|   | Sample Name                      | Vial  | Inj | Retention Time (min) | Area     | % Area | Height  |
|---|----------------------------------|-------|-----|----------------------|----------|--------|---------|
| 1 | AB-SP-02dhnvpv_OD-H-30-01-CHI_RE | 1:A,1 | 1   | 14.370               | 75012959 | 49.46  | 1227625 |
| 2 | AB-SP-02dhnvpv_OD-H-30-01-CHI_RE | 1:A,1 | 1   | 29.402               | 982372   | 0.65   | 8619    |
| 3 | AB-SP-02dhnvpv_OD-H-30-01-CHI_RE | 1:A,1 | 1   | 23.586               | 72394760 | 47.73  | 642156  |
| 4 | AB-SP-02dhnvpv_OD-H-30-01-CHI_RE | 1:A,1 | 1   | 18.857               | 3283296  | 2.16   | 36603   |

Reported by User: System  
Report Method: Peak Summary Report  
Report Method ID: 2585  
Page: 1 of 2

Project Name: AB Research Group  
Date Printed: 07-10-2024  
19:15:43 Asia/Kolkata

HPLC data of (-)-**26** (diastereomeric mixtures)

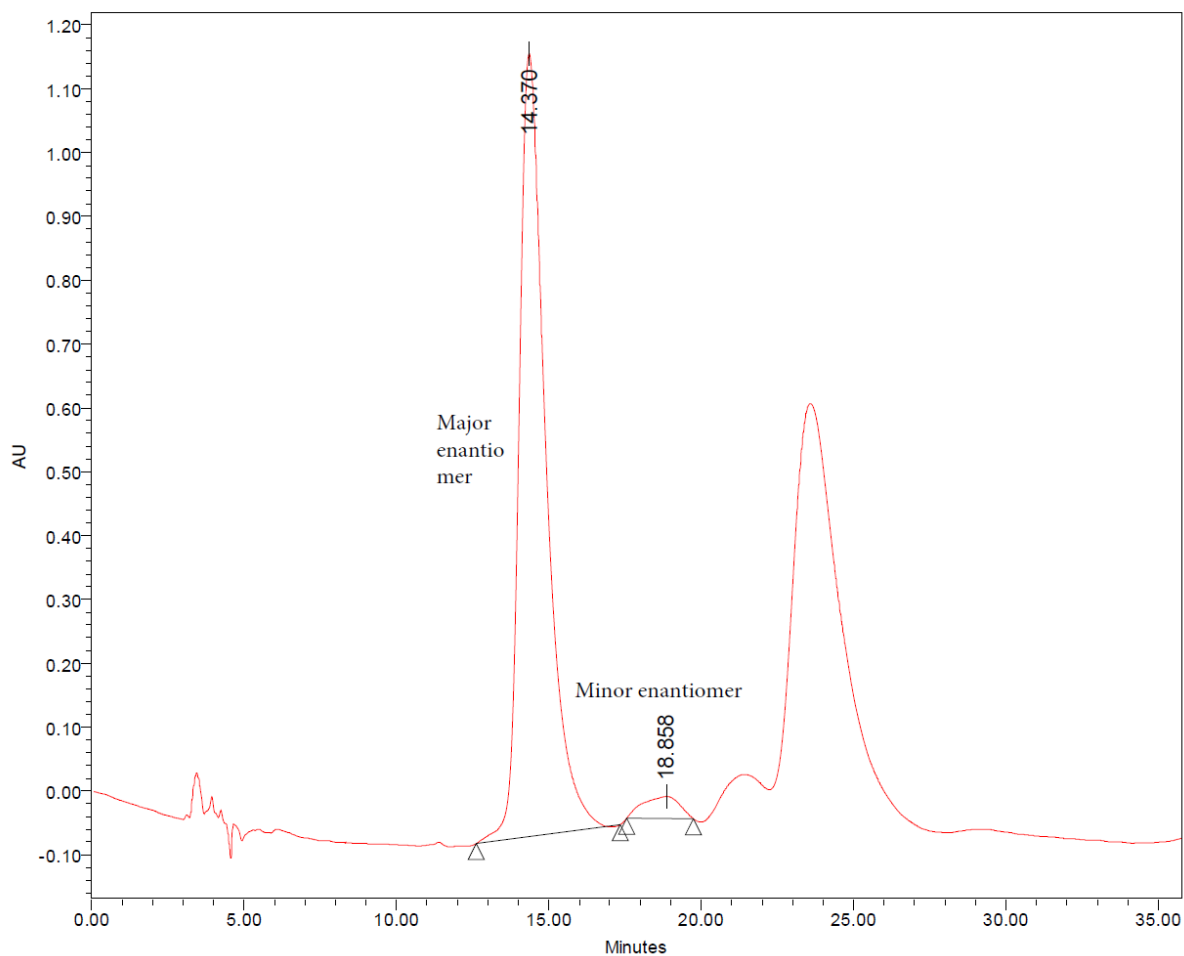

Sample Name: AB-SP-02dhnpv\_OD-H-30-01-CHI\_RE; Date Acquired: 07-10-2024 18:31:31 IST; Vial: 1:A,1; Injection: 1

Peak Summary with Statistics  
Name:

|           | Sample Name                     | Vial  | Inj | Retention Time (min) | Area     | % Area | Height  |
|-----------|---------------------------------|-------|-----|----------------------|----------|--------|---------|
| 1         | AB-SP-02dhnpv_OD-H-30-01-CHI_RE | 1:A,1 | 1   | 18.858               | 2896381  | 3.73   | 34807   |
| 2         | AB-SP-02dhnpv_OD-H-30-01-CHI_RE | 1:A,1 | 1   | 14.370               | 74739034 | 96.27  | 1226782 |
| Mean      |                                 |       |     | 16.614               |          |        |         |
| Std. Dev. |                                 |       |     | 3.173                |          |        |         |

HPLC data of (–)-**26** (diastereomeric mixtures) which shows the enantiopurity (93% ee) of the atropodiastereomer

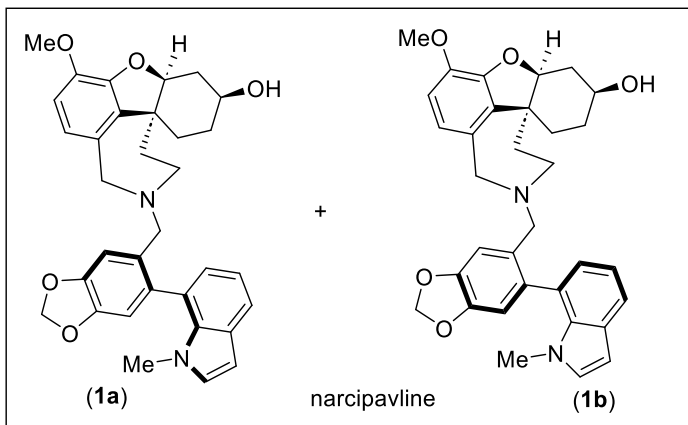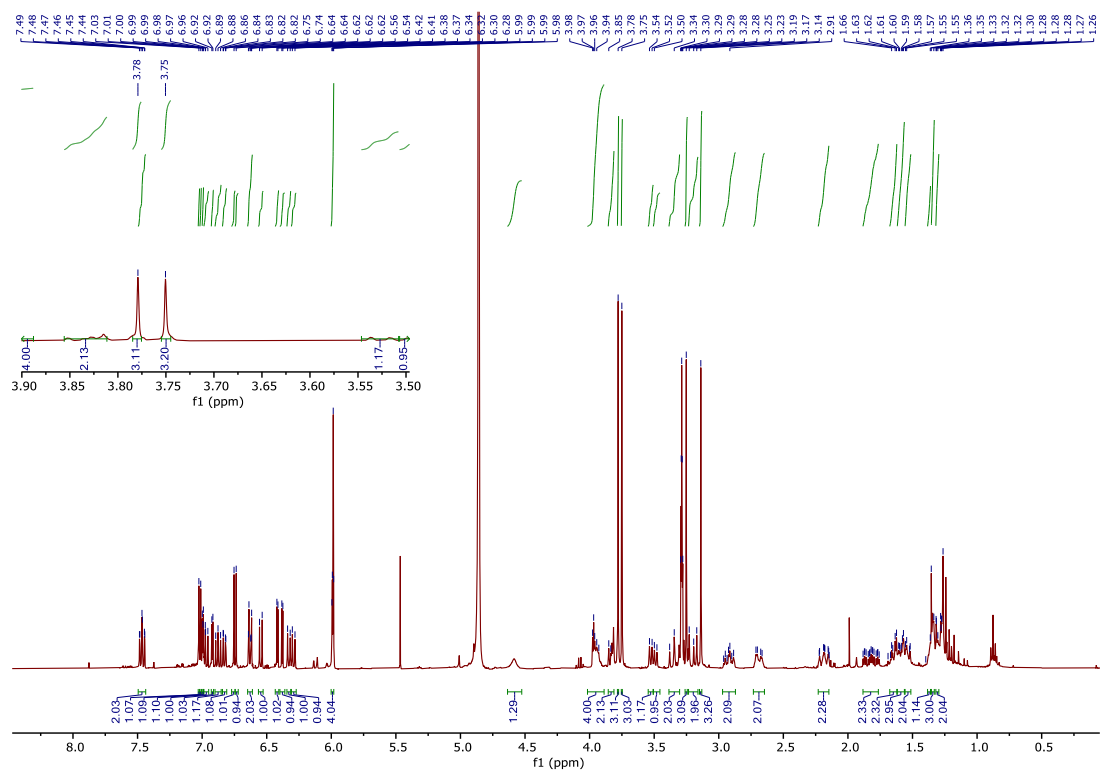

$^1\text{H}$  NMR (400 MHz,  $\text{CD}_3\text{OD}$ ) of (-)-narcipavline (1a and 1b)



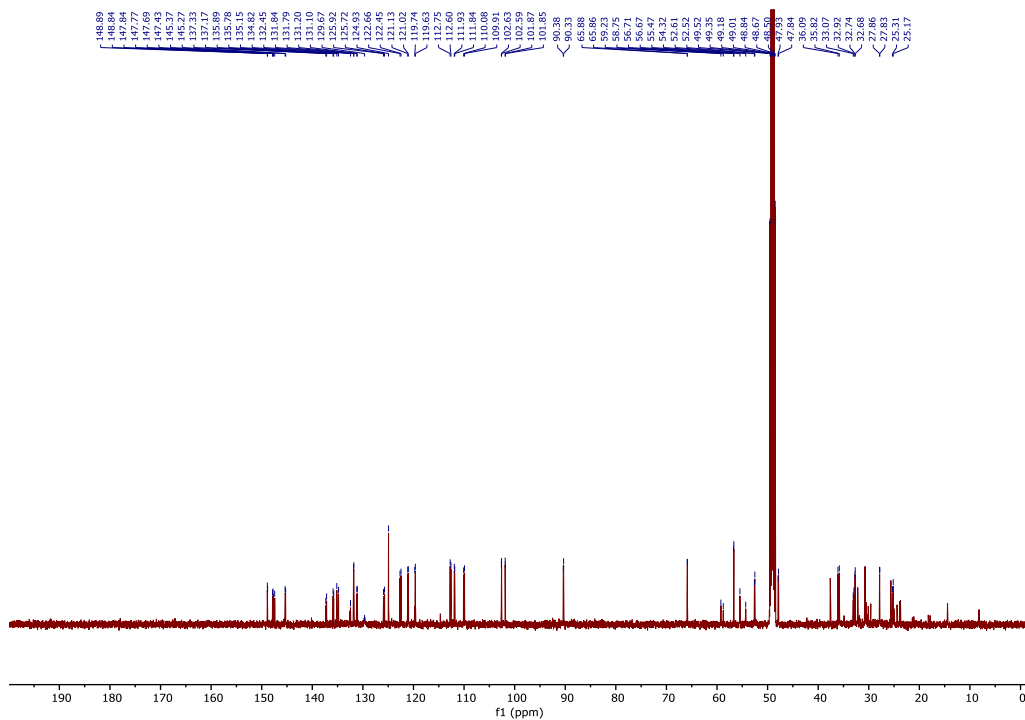

$^{13}\text{C}$   $\{^1\text{H}\}$  NMR (126 MHz,  $\text{CD}_3\text{OD}$ ) of (-)-narcipavline (**1a** and **1b**)

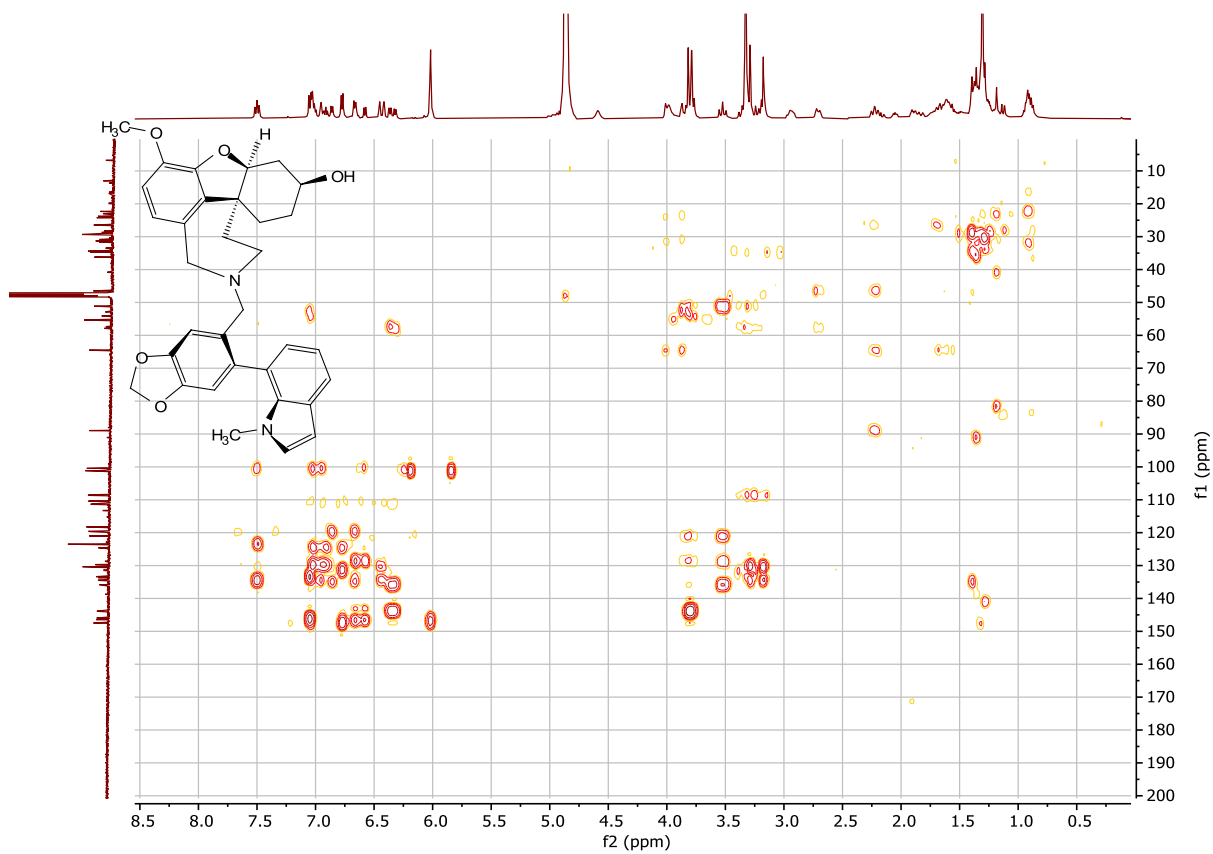

$^1\text{H}$ - $^{13}\text{C}$  HMBC spectrum of (-)-narcipavline (**1**) in  $\text{CD}_3\text{OD}$

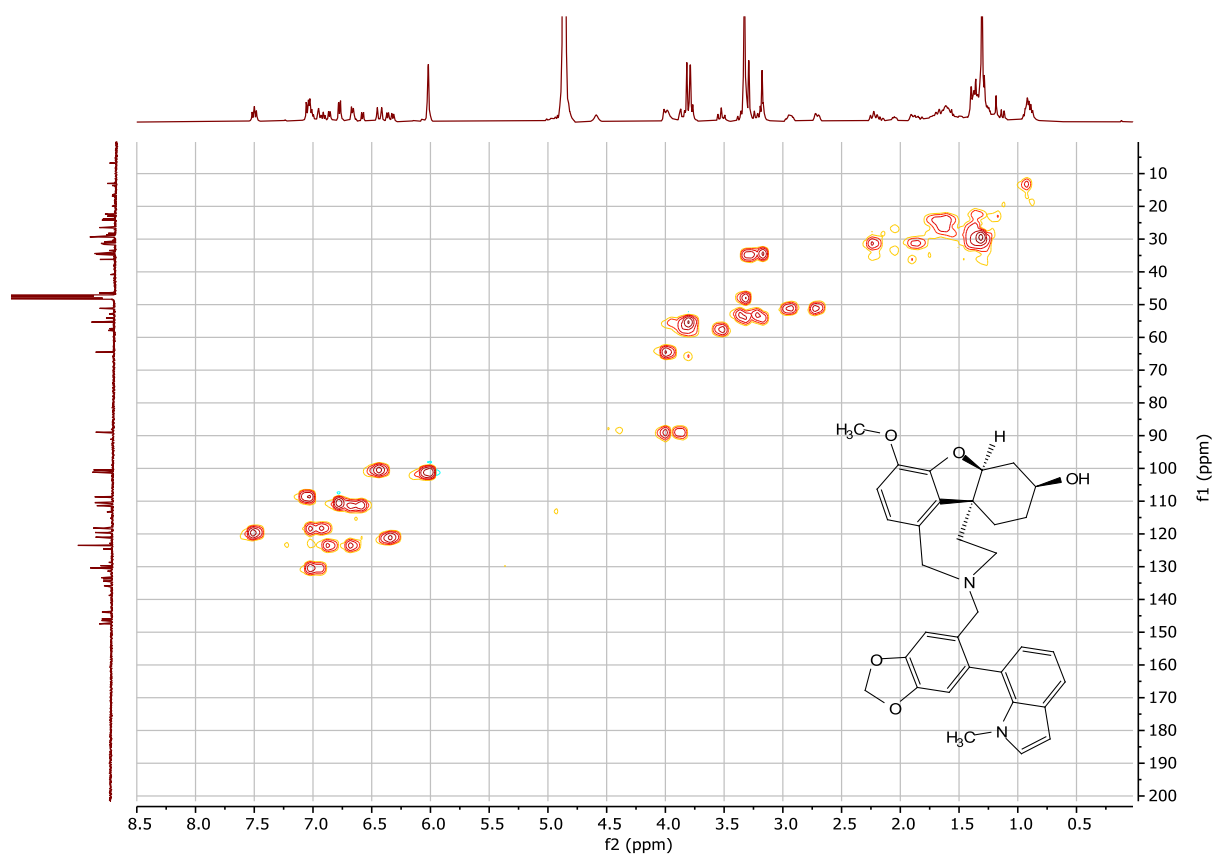

$^1\text{H}$ - $^{13}\text{C}$  HSQC spectrum of of (-)-narcipavline (**1**) in  $\text{CD}_3\text{OD}$

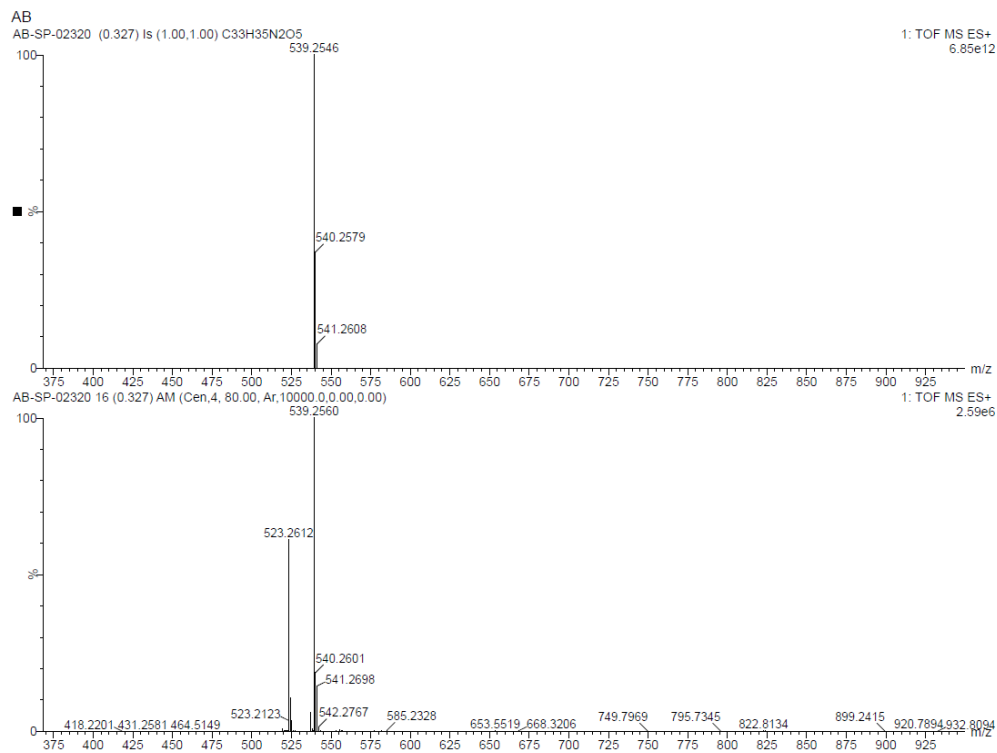

HRMS data of (-)-Narcipavline (**1**)

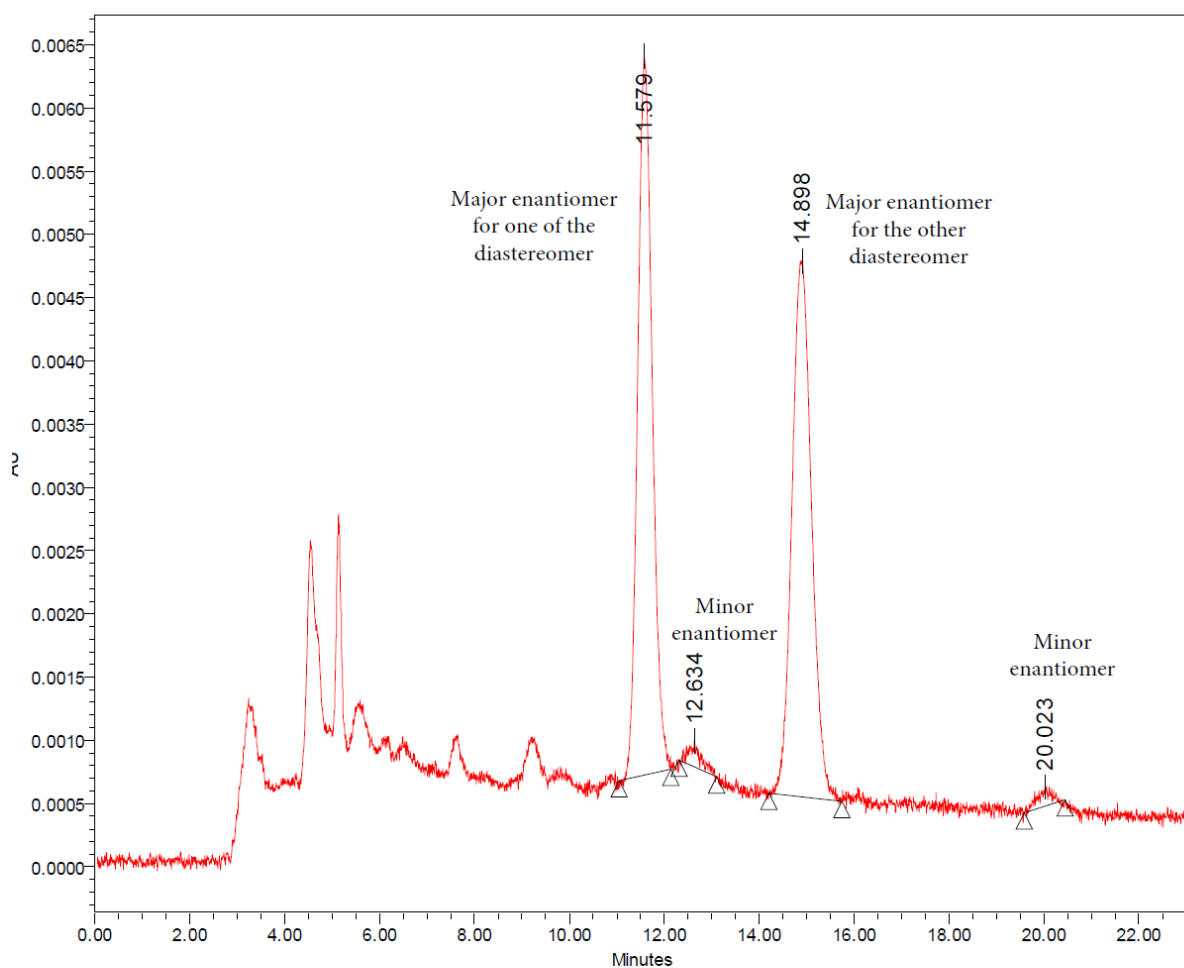

Sample Name: AB\_SP\_NPV\_OD-H\_40\_01\_DR\_CHI; Date Acquired: 18-05-2024 19:48:10 IST; Vial: 1  
Injection: 2

**Peak Summary with Statistics**  
Name:

|   | Sample Name                 | Vial | Inj | Retention Time (min) | Area   | % Area | Height |
|---|-----------------------------|------|-----|----------------------|--------|--------|--------|
| 1 | AB_SP_NPV_OD-H_40_01_DR_CHI | 1    | 2   | 11.579               | 122629 | 48.69  | 5686   |
| 2 | AB_SP_NPV_OD-H_40_01_DR_CHI | 1    | 2   | 20.023               | 3205   | 1.27   | 155    |
| 3 | AB_SP_NPV_OD-H_40_01_DR_CHI | 1    | 2   | 14.898               | 122419 | 48.60  | 4238   |
| 4 | AB_SP_NPV_OD-H_40_01_DR_CHI | 1    | 2   | 12.634               | 3623   | 1.44   | 210    |

Reported by User: System  
Report Method: Peak Summary Report  
Report Method ID 7327  
Page: 1 of 2

Project Name: AB Research Group  
Date Printed: 07-10-2024  
23:29:54 Asia/Calcutta

HPLC data of (–)-narcipavline (1)

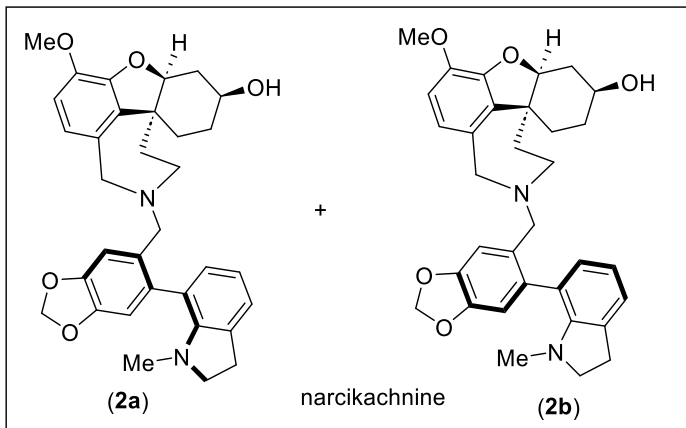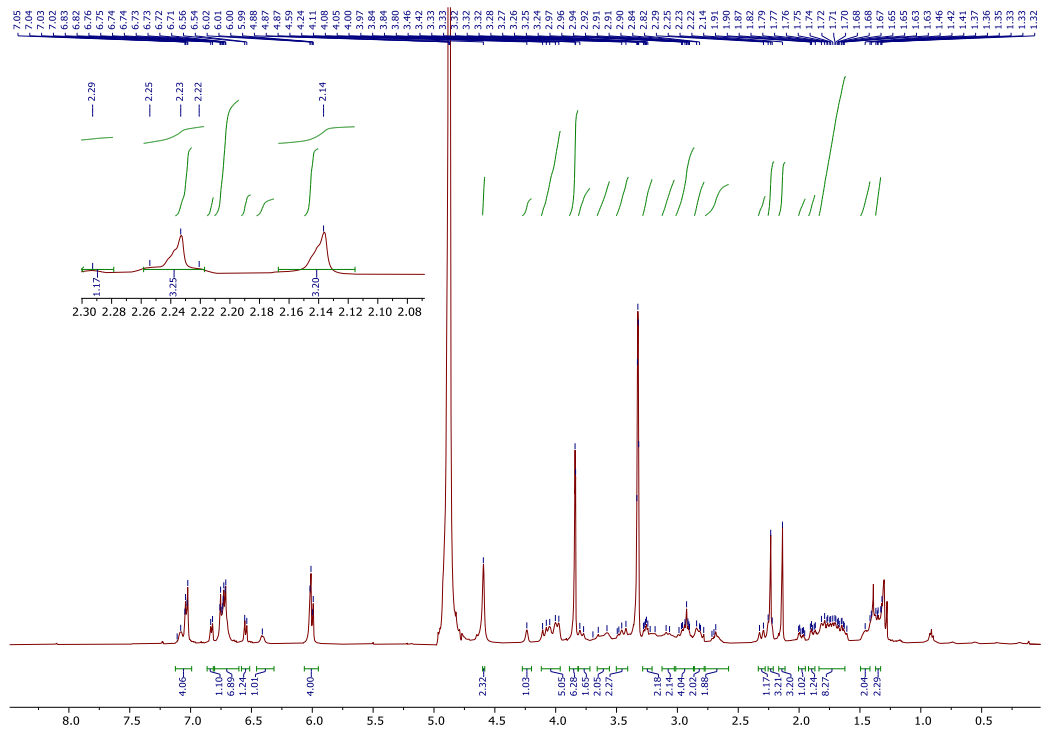

$^1\text{H}$  NMR (500 MHz,  $\text{CD}_3\text{OD}$ ) of (-)-narcikachnine (1:1 dr of **2a** and **2b**)

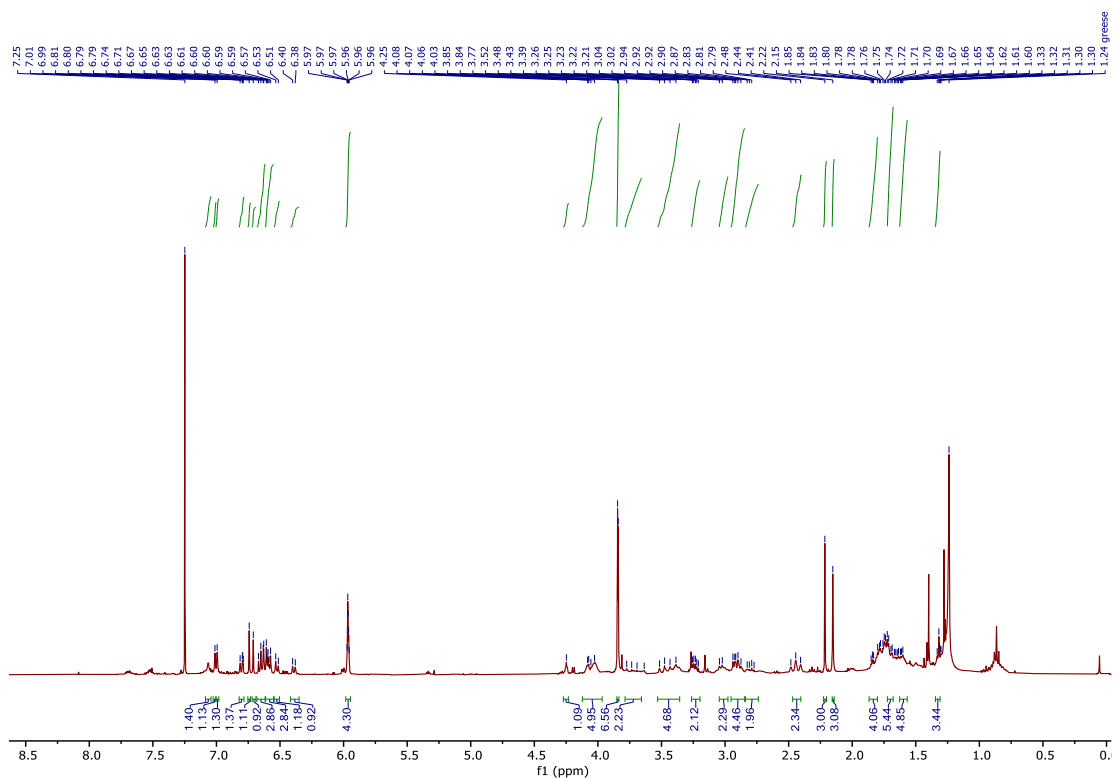

$^1\text{H}$  NMR (400 MHz,  $\text{CDCl}_3$ ) of (-)-narcikachnine (1:1 dr of **2a** and **2b**)

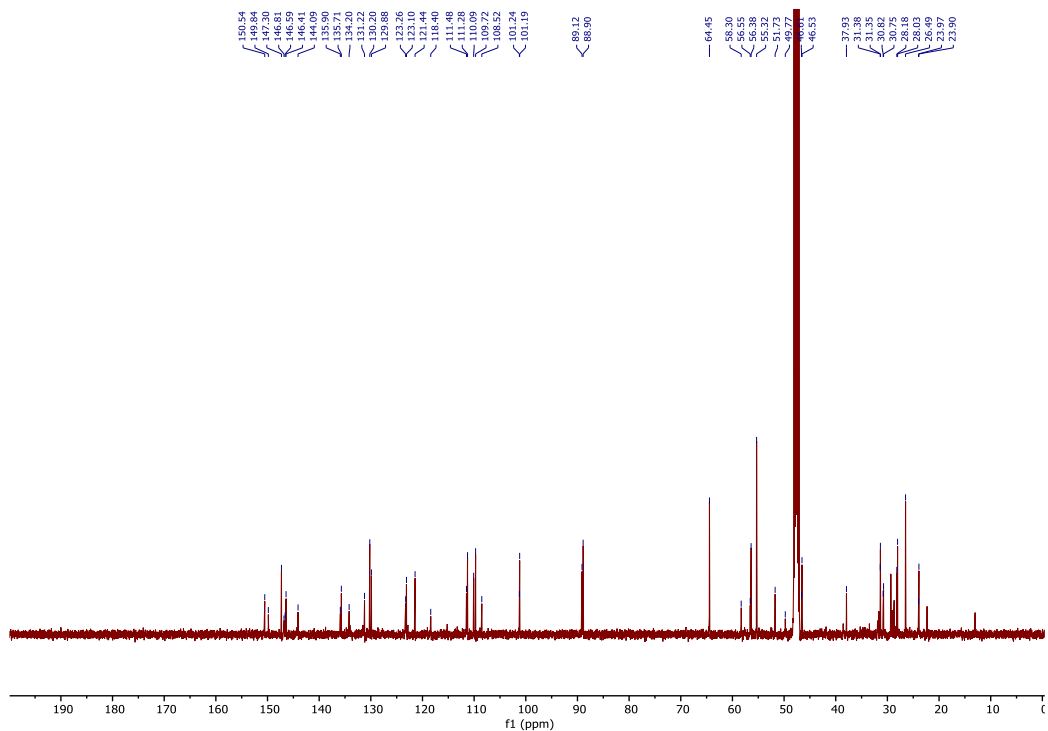

$^{13}\text{C}$   $\{^1\text{H}\}$  NMR (126 MHz,  $\text{CD}_3\text{OD}$ ) of (-)-narcikachnine (1:1 dr of **2a** and **2b**)

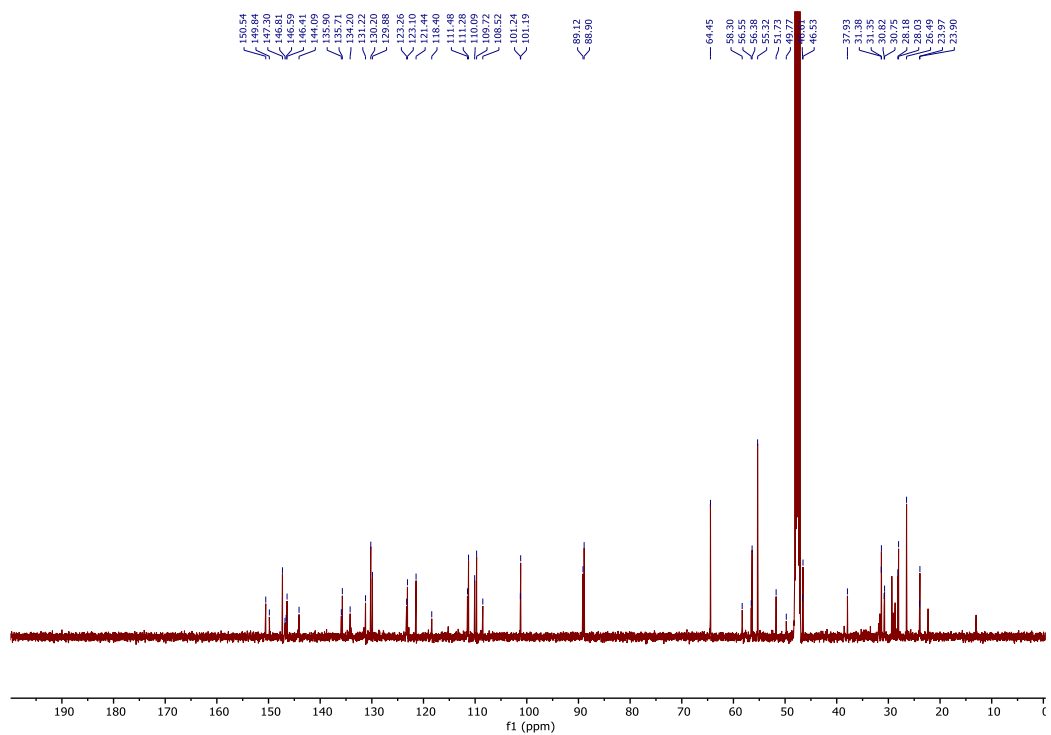

$^{13}\text{C}$  { $^1\text{H}$ } NMR (126 MHz,  $\text{CDCl}_3$ ) of (-)-narcikachnine (1:1 dr of **2a** and **2b**)

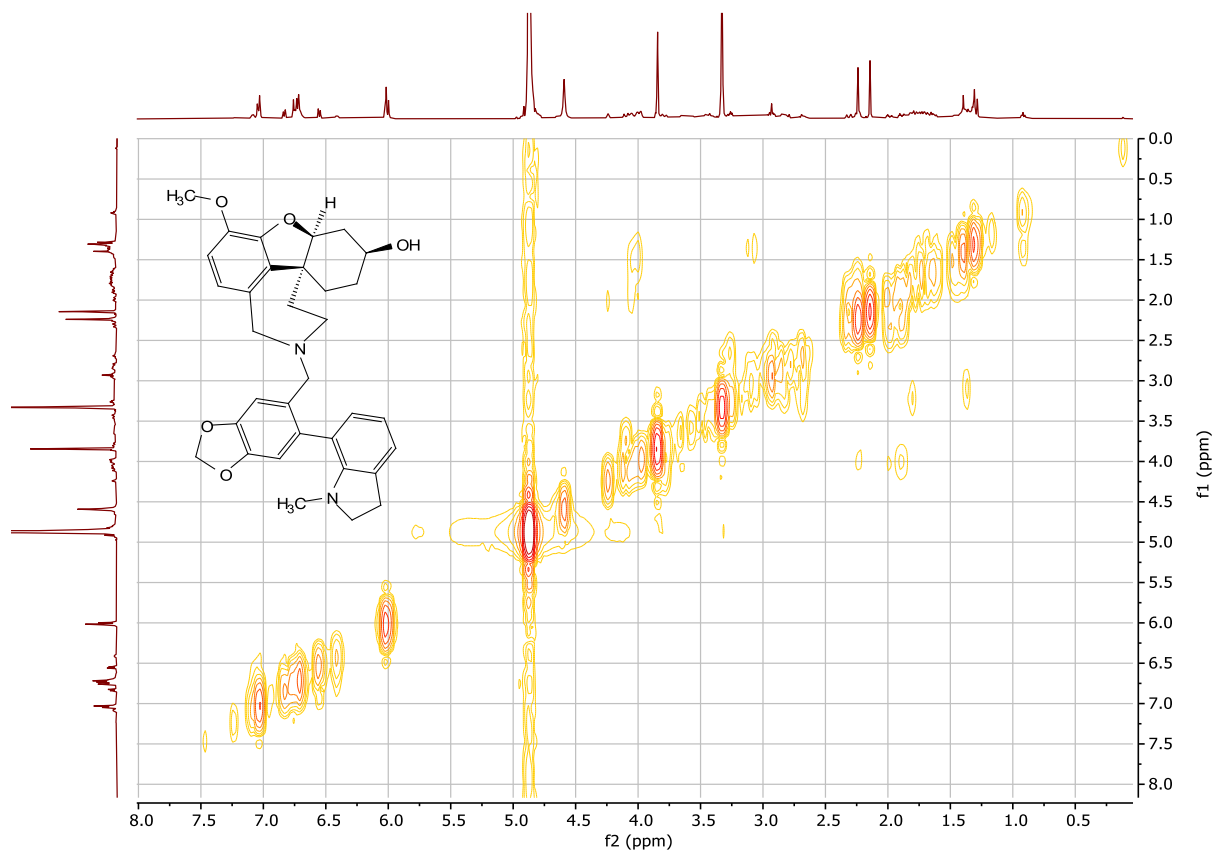

$^1\text{H}$ - $^1\text{H}$  COSY spectrum of (-)-narcikachnine (**2**) in  $\text{CD}_3\text{OD}$

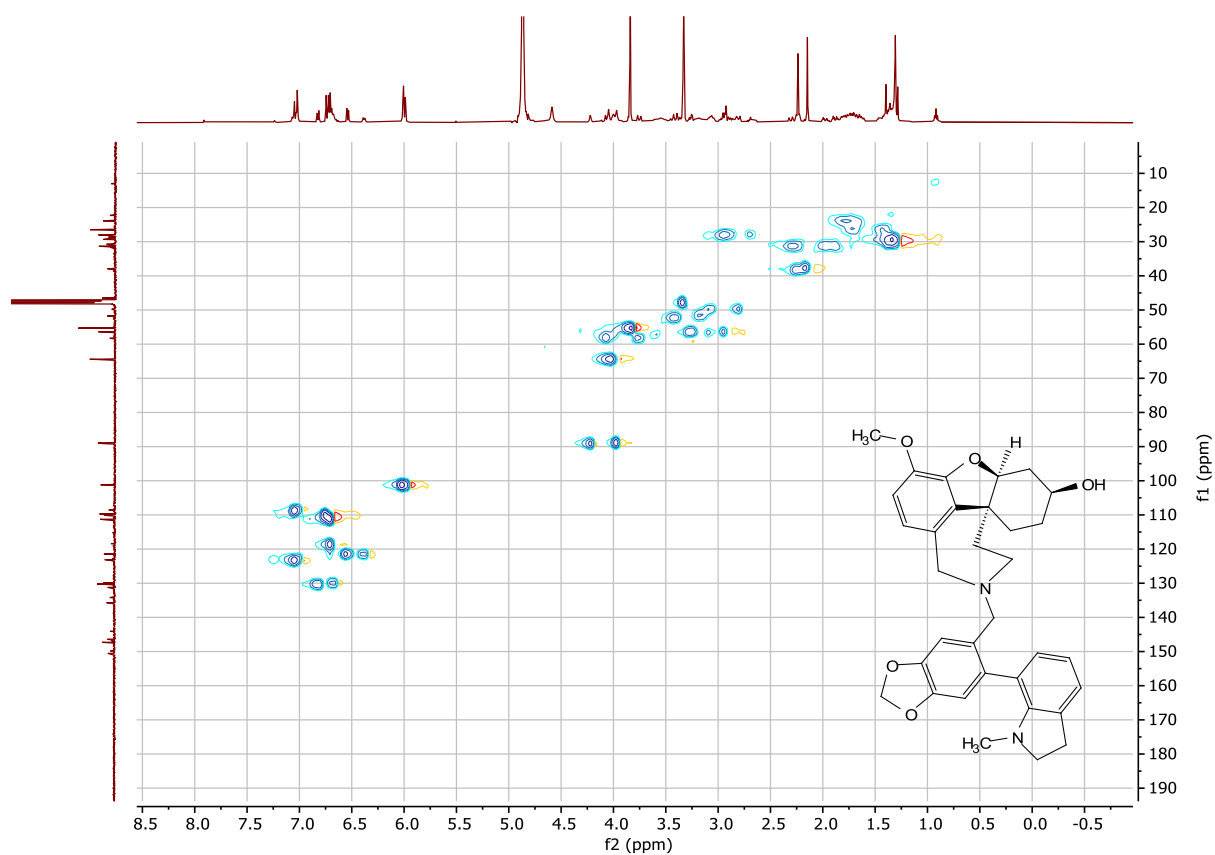

$^1\text{H}$ - $^{13}\text{C}$  HSQC spectrum of (-)-narcikachnine (**2**) in  $\text{CD}_3\text{OD}$

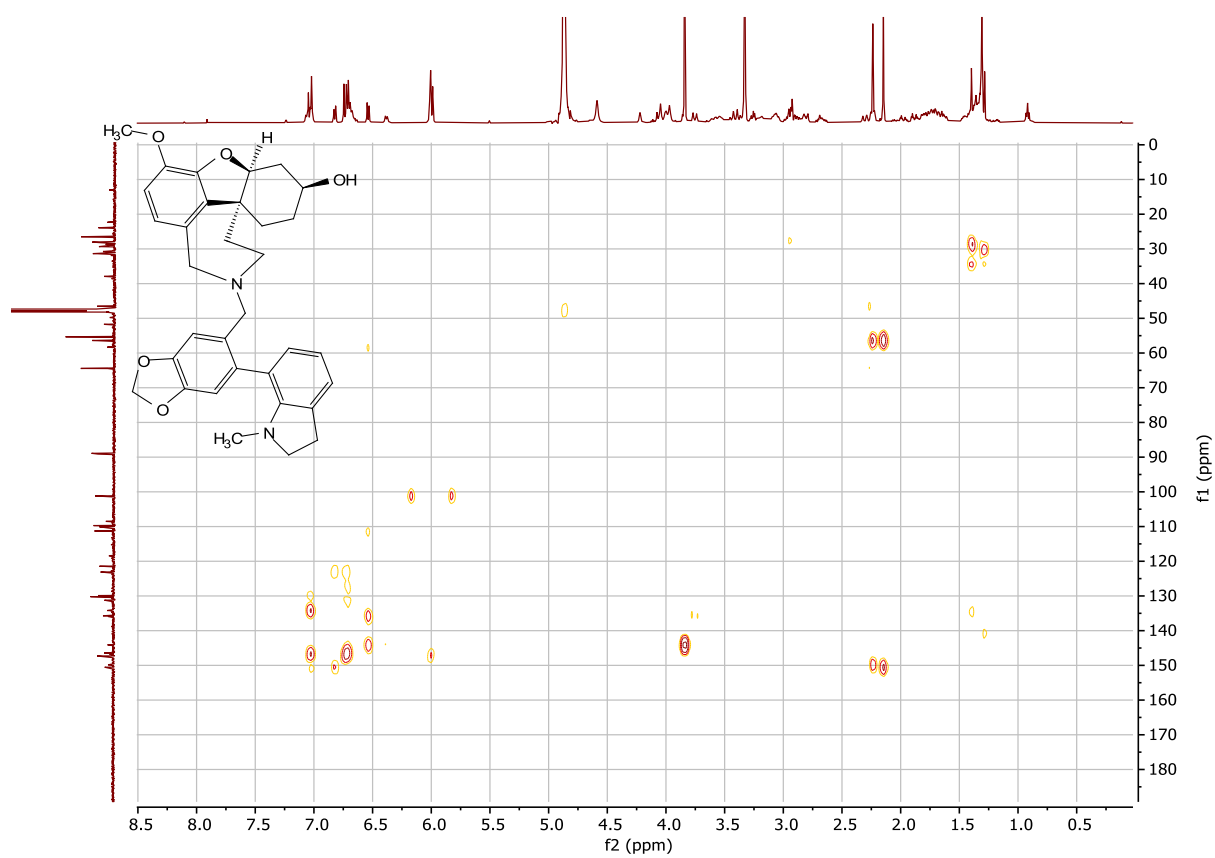

$^1\text{H}$ - $^{13}\text{C}$  HMBC spectrum of (-)-narcikachnine (**2**) in  $\text{CD}_3\text{OD}$

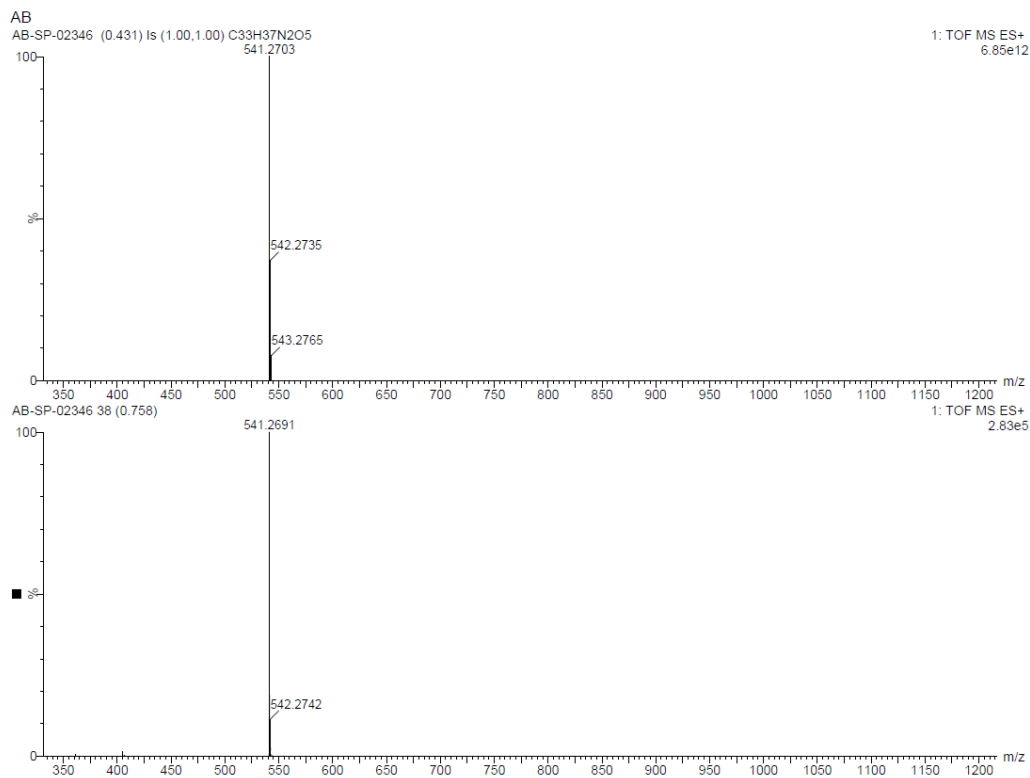

### HRMS data of Narcikachnine (-)-2

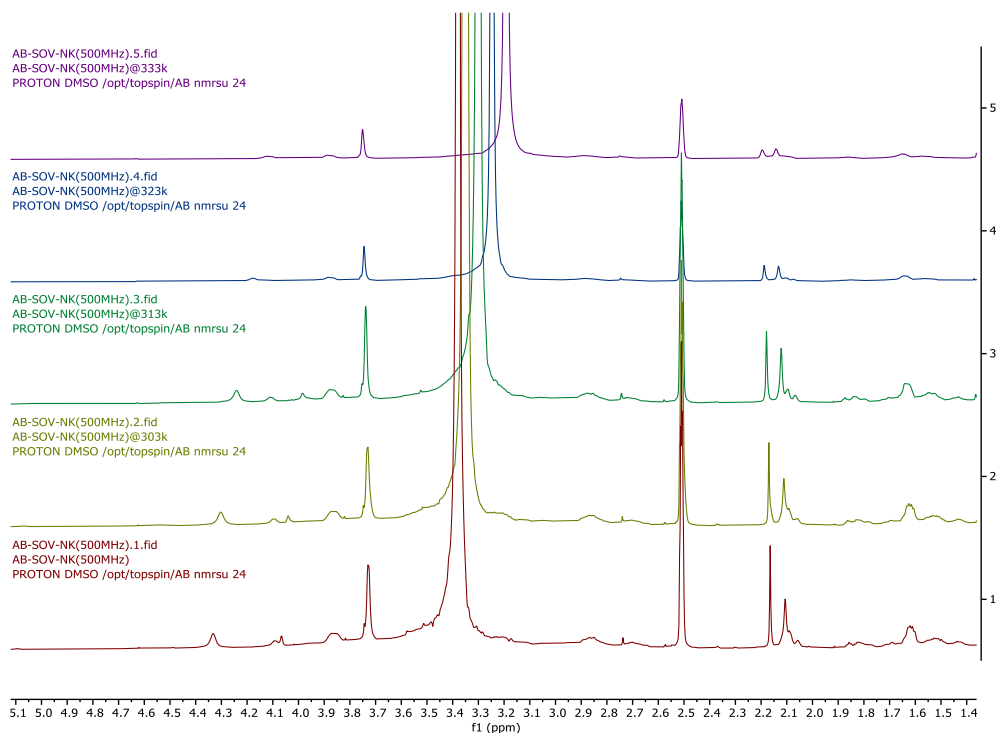

VT experiment spectrum of Narcikachnine [(-)-2] at 298k, 303k, 313k, 323k, 333k, in DMSO-d<sub>6</sub> solvent (500 MHz) [zoomed 1.5-5.0 ppm]



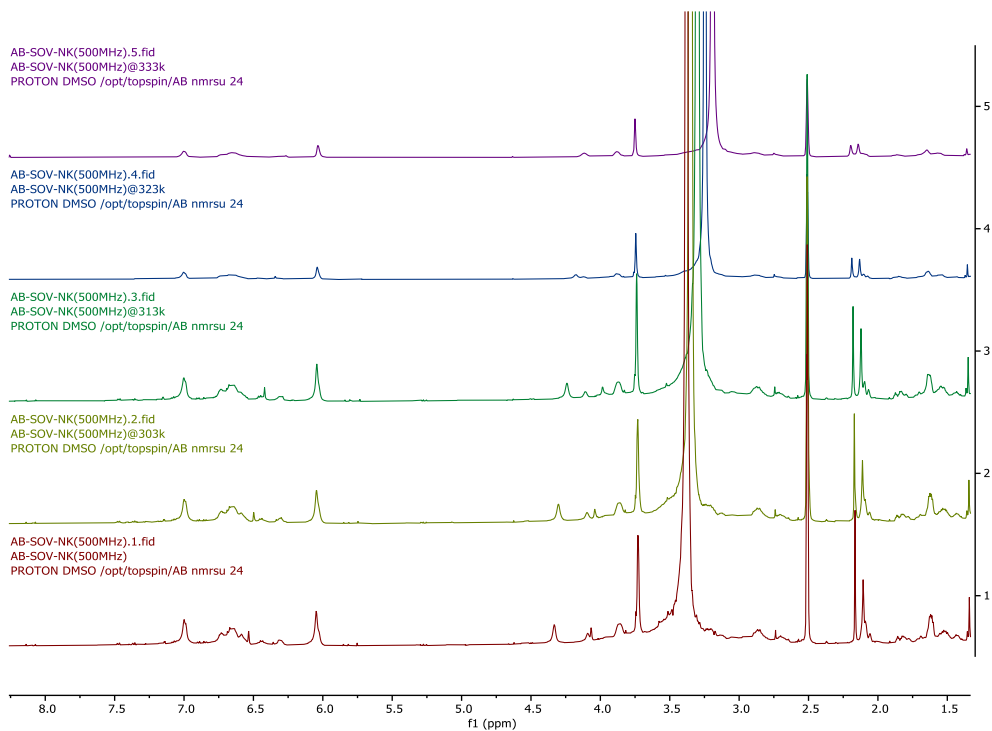

VT experiment spectrum of Narcikachnine [(-)-**2**] at 298k, 303k, 313k, 323k, 333k, in DMSO-d<sub>6</sub> solvent (500 MHz)

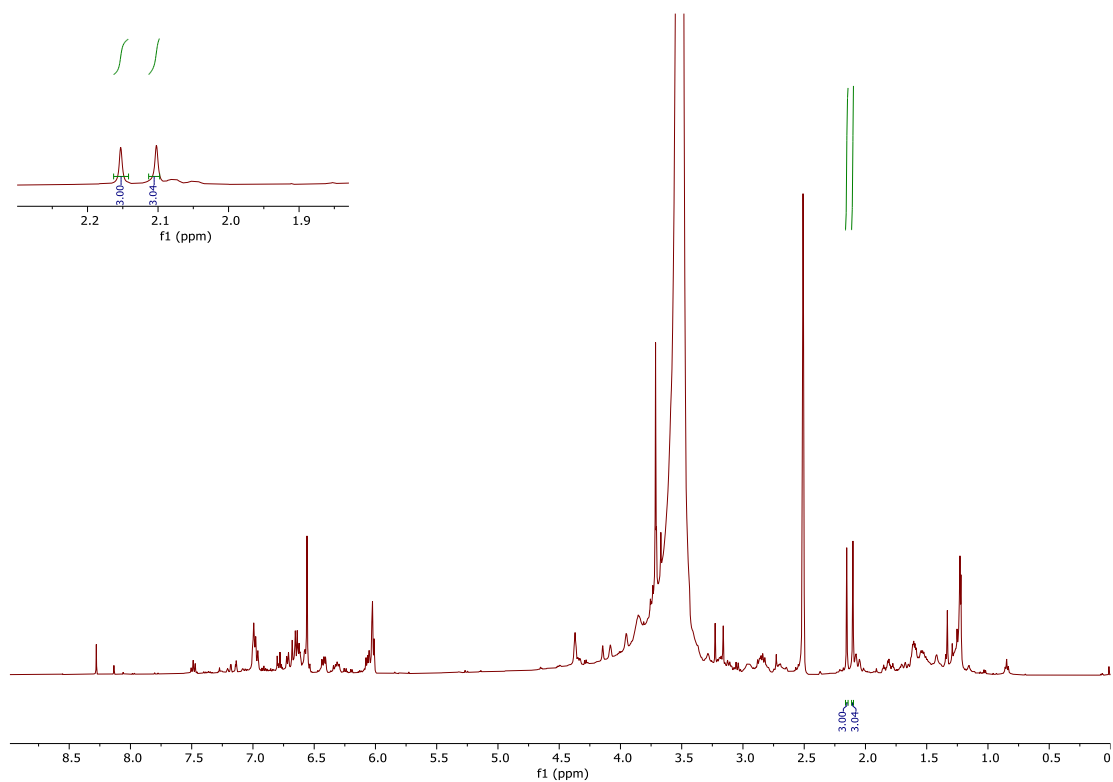

<sup>1</sup>H NMR of (-)-narcikachnine at 298 k after VT experiment cooling back to RT

## SCXRD Data of 20

### Crystal Data and Structure Refinement of 20 (CCDC 2333542):

A colorless block  $0.01 \times 0.02 \times 0.04$  mm in size was mounted on a Cryoloop with Paratone oil. Data were collected in a nitrogen gas stream at 100.15 K using omega scans. Crystal-to detector distance was 42 mm and exposure time was 0.50 seconds per frame at low angles and 2.00 seconds at high angles, using a scan width of  $0.5^\circ$ . The  $2\theta$  range for data collection  $^\circ$  7.252 to 136.454. A total of 20564 reflections were collected covering the indices  $-11 \leq h \leq 9$ ,  $-18 \leq k \leq 18$ ,  $-11 \leq l \leq 11$ . 2597 reflections were founded to be symmetry independent, with an Rint of 0.0585. Indexing and unit cell refinement indicated a primitive, monoclinic lattice.

The space group was found to be P 1 21/n 1 CrysAlisPro 1.171.41.115a (Rigaku Oxford Diffraction, 2021) Empirical absorption correction using spherical harmonics, implemented in SCALE3 ABSPACK scaling algorithm. Solution by intrinsic phasing (SHELXT-2018/2) produced a heavy-atom phasing model consistent with the proposed structure. All nonhydrogen atoms were refined anisotropically by least-squares (SHELXL-2018/3). All hydrogen atoms were placed using a riding model. Their positions were constrained relative to their parent atom using the appropriate HFIX command in SHELXL-2018/3.

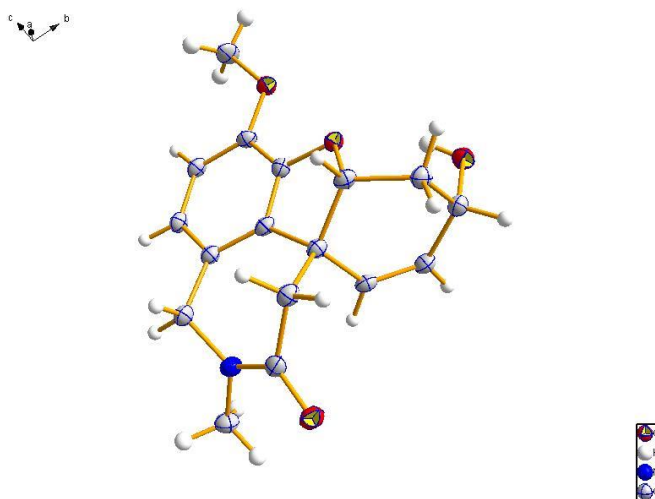

ORTEP Diagram of 20

| <b>Table 1 Crystal data and structure refinement for AB_AYA_SP02261BR_auto.</b> |                                                 |
|---------------------------------------------------------------------------------|-------------------------------------------------|
| Identification code                                                             | AB_AYA_SP02261BR_auto                           |
| Empirical formula                                                               | C <sub>17</sub> H <sub>19</sub> NO <sub>4</sub> |

|                                             |                                                               |
|---------------------------------------------|---------------------------------------------------------------|
| Formula weight                              | 301.33                                                        |
| Temperature/K                               | 100.01(15)                                                    |
| Crystal system                              | monoclinic                                                    |
| Space group                                 | P2 <sub>1</sub> /n                                            |
| a/Å                                         | 9.7354(2)                                                     |
| b/Å                                         | 15.3138(2)                                                    |
| c/Å                                         | 9.9359(2)                                                     |
| α/°                                         | 90                                                            |
| β/°                                         | 105.393(2)                                                    |
| γ/°                                         | 90                                                            |
| Volume/Å <sup>3</sup>                       | 1428.17(5)                                                    |
| Z                                           | 4                                                             |
| ρ <sub>calc</sub> /g/cm <sup>3</sup>        | 1.401                                                         |
| μ/mm <sup>-1</sup>                          | 0.821                                                         |
| F(000)                                      | 640.0                                                         |
| Crystal size/mm <sup>3</sup>                | 0.04 × 0.02 × 0.01                                            |
| Radiation                                   | Cu Kα (λ = 1.54184)                                           |
| 2θ range for data collection/°              | 10.894 to 136.478                                             |
| Index ranges                                | -11 ≤ h ≤ 9, -18 ≤ k ≤ 18, -11 ≤ l ≤ 11                       |
| Reflections collected                       | 20564                                                         |
| Independent reflections                     | 2597 [R <sub>int</sub> = 0.0585, R <sub>sigma</sub> = 0.0270] |
| Data/restraints/parameters                  | 2597/0/202                                                    |
| Goodness-of-fit on F <sup>2</sup>           | 1.057                                                         |
| Final R indexes [I ≥ 2σ (I)]                | R <sub>1</sub> = 0.0376, wR <sub>2</sub> = 0.0999             |
| Final R indexes [all data]                  | R <sub>1</sub> = 0.0408, wR <sub>2</sub> = 0.1028             |
| Largest diff. peak/hole / e Å <sup>-3</sup> | 0.24/-0.27                                                    |

**Table 2 Fractional Atomic Coordinates (×10<sup>4</sup>) and Equivalent Isotropic Displacement Parameters (Å<sup>2</sup>×10<sup>3</sup>) for AB\_AYA\_SP02261BR\_auto. U<sub>eq</sub> is defined as 1/3 of the trace of the orthogonalised U<sub>ij</sub> tensor.**

| Atom | x           | y          | z            | U(eq)    |
|------|-------------|------------|--------------|----------|
| O3   | 5322.1 (10) | 8290.0 (6) | 3304.9 (9)   | 18.5 (2) |
| O4   | 5004.7 (10) | 8232.5 (6) | 6006.8 (10)  | 22.0 (2) |
| O2   | 3650.0 (11) | 5863.7 (6) | -1258.9 (10) | 23.5 (2) |
| O1   | 4014.4 (11) | 9713.4 (6) | 1574.5 (10)  | 25.3 (3) |
| N1   | 3382.6 (12) | 5420.0 (7) | 841.6 (12)   | 20.1 (3) |
| C11  | 4443.7 (14) | 6892.8 (9) | 2890.5 (13)  | 17.6 (3) |
| C12  | 4764.8 (14) | 7576.1 (9) | 3824.2 (14)  | 17.9 (3) |
| C16  | 3908.1 (14) | 6005.2 (9) | 4636.1 (14)  | 19.4 (3) |
| C15  | 4183.8 (14) | 6705.7 (9) | 5571.9 (14)  | 19.9 (3) |

**Table 2 Fractional Atomic Coordinates ( $\times 10^4$ ) and Equivalent Isotropic Displacement Parameters ( $\text{\AA}^2 \times 10^3$ ) for AB\_AYA\_SP02261BR\_auto.  $U_{eq}$  is defined as 1/3 of the trace of the orthogonalised  $U_{ij}$  tensor.**

| Atom | $x$         | $y$         | $z$         | $U(eq)$  |
|------|-------------|-------------|-------------|----------|
| C5   | 4701.7 (14) | 7202.6 (9)  | 1529.9 (13) | 17.2 (3) |
| C10  | 4046.6 (14) | 6077.8 (9)  | 3277.0 (14) | 18.1 (3) |
| C7   | 4055.9 (14) | 5871.1 (8)  | 28.8 (14)   | 19.0 (3) |
| C4   | 3304.8 (14) | 7577.0 (9)  | 638.4 (13)  | 17.8 (3) |
| C6   | 5278.5 (14) | 6465.3 (9)  | 772.9 (14)  | 19.3 (3) |
| C1   | 5743.7 (14) | 8684.5 (9)  | 1085.4 (14) | 20.1 (3) |
| C3   | 3112.2 (14) | 8409.3 (9)  | 258.6 (14)  | 19.9 (3) |
| C14  | 4634.5 (14) | 7508.7 (9)  | 5181.4 (14) | 18.6 (3) |
| C13  | 5764.1 (14) | 7946.9 (9)  | 2093.9 (13) | 17.7 (3) |
| C9   | 3981.2 (15) | 5285.5 (9)  | 2354.4 (14) | 20.6 (3) |
| C2   | 4265.1 (15) | 9089.7 (9)  | 574.1 (14)  | 20.8 (3) |
| C8   | 2067.4 (15) | 4950.3 (10) | 195.9 (15)  | 24.6 (3) |
| C17  | 5211.1 (18) | 8115.3 (10) | 7470.6 (15) | 28.8 (4) |

**Table 3 Anisotropic Displacement Parameters ( $\text{\AA}^2 \times 10^3$ ) for AB\_AYA\_SP02261BR\_auto. The Anisotropic displacement factor exponent takes the form:  $-2\pi^2[h^2a^*2U_{11}+2hka^*b^*U_{12}+\dots]$ .**

| Atom | $U_{11}$ | $U_{22}$ | $U_{33}$ | $U_{23}$ | $U_{13}$ | $U_{12}$ |
|------|----------|----------|----------|----------|----------|----------|
| O3   | 21.9 (5) | 20.2 (5) | 14.4 (5) | 0.0 (4)  | 6.6 (4)  | -1.8 (4) |
| O4   | 29.7 (5) | 22.1 (5) | 15.0 (5) | -1.9 (4) | 7.1 (4)  | -1.5 (4) |
| O2   | 27.4 (5) | 27.0 (5) | 16.2 (5) | -1.6 (4) | 5.9 (4)  | 2.6 (4)  |
| O1   | 29.2 (6) | 21.6 (5) | 25.1 (5) | -1.9 (4) | 7.2 (4)  | 1.6 (4)  |
| N1   | 21.4 (6) | 21.6 (6) | 16.4 (6) | -1.1 (4) | 3.5 (5)  | -0.4 (5) |
| C11  | 14.4 (6) | 22.9 (7) | 15.2 (6) | 1.0 (5)  | 3.6 (5)  | 2.0 (5)  |
| C12  | 16.5 (6) | 19.7 (6) | 17.7 (6) | 2.5 (5)  | 4.6 (5)  | 0.8 (5)  |
| C16  | 18.5 (7) | 21.1 (7) | 19.1 (7) | 3.1 (5)  | 5.8 (5)  | -0.2 (5) |
| C15  | 20.2 (7) | 25.6 (7) | 15.0 (6) | 2.2 (5)  | 6.5 (5)  | 1.2 (5)  |
| C5   | 17.1 (6) | 20.0 (6) | 14.6 (6) | 0.9 (5)  | 4.6 (5)  | 0.0 (5)  |
| C10  | 15.3 (6) | 21.1 (7) | 17.5 (7) | 0.6 (5)  | 3.7 (5)  | 0.9 (5)  |
| C7   | 21.3 (7) | 19.0 (7) | 17.5 (7) | -1.0 (5) | 6.4 (5)  | 5.0 (5)  |
| C4   | 16.5 (7) | 23.5 (7) | 13.3 (6) | -1.7 (5) | 3.7 (5)  | -0.7 (5) |
| C6   | 19.9 (7) | 22.3 (7) | 16.7 (6) | 0.5 (5)  | 6.7 (5)  | 1.2 (5)  |
| C1   | 21.7 (7) | 23.1 (7) | 16.4 (6) | 0.7 (5)  | 6.8 (5)  | -3.4 (5) |
| C3   | 17.7 (7) | 24.0 (7) | 17.4 (7) | 0.3 (5)  | 3.4 (5)  | 1.1 (5)  |
| C14  | 18.3 (7) | 20.9 (7) | 16.6 (6) | -2.1 (5) | 4.8 (5)  | 1.4 (5)  |
| C13  | 17.3 (6) | 22.1 (7) | 14.6 (6) | -1.2 (5) | 5.6 (5)  | -0.4 (5) |
| C9   | 24.5 (7) | 20.3 (7) | 17.0 (7) | 2.1 (5)  | 5.2 (5)  | 0.2 (5)  |
| C2   | 24.0 (7) | 20.6 (7) | 18.0 (7) | 1.3 (5)  | 5.7 (5)  | -0.8 (5) |

**Table 3 Anisotropic Displacement Parameters ( $\text{\AA}^2 \times 10^3$ ) for AB\_AYA\_SP02261BR\_auto. The Anisotropic displacement factor exponent takes the form:  $-2\pi^2[h^2a^*^2U_{11}+2hka^*b^*U_{12}+\dots]$ .**

| Atom | U <sub>11</sub> | U <sub>22</sub> | U <sub>33</sub> | U <sub>23</sub> | U <sub>13</sub> | U <sub>12</sub> |
|------|-----------------|-----------------|-----------------|-----------------|-----------------|-----------------|
| C8   | 22.9 (7)        | 26.5 (7)        | 23.3 (7)        | -2.6 (6)        | 4.3 (6)         | -3.4 (6)        |
| C17  | 42.7 (9)        | 29.9 (8)        | 15.6 (7)        | -3.1 (6)        | 10.9 (6)        | -6.6 (7)        |

**Table 4 Bond Lengths for AB\_AYA\_SP02261BR\_auto.**

| Atom | Atom | Length/ $\text{\AA}$ | Atom | Atom | Length/ $\text{\AA}$ |
|------|------|----------------------|------|------|----------------------|
| O3   | C12  | 1.3799 (16)          | C16  | C15  | 1.3982 (19)          |
| O3   | C13  | 1.4778 (15)          | C16  | C10  | 1.3967 (19)          |
| O4   | C14  | 1.3691 (16)          | C15  | C14  | 1.3947 (19)          |
| O4   | C17  | 1.4257 (16)          | C5   | C4   | 1.5242 (17)          |
| O2   | C7   | 1.2349 (16)          | C5   | C6   | 1.5428 (18)          |
| O1   | C2   | 1.4452 (16)          | C5   | C13  | 1.5412 (18)          |
| N1   | C7   | 1.3565 (18)          | C10  | C9   | 1.5118 (18)          |
| N1   | C9   | 1.4752 (17)          | C7   | C6   | 1.5246 (19)          |
| N1   | C8   | 1.4603 (18)          | C4   | C3   | 1.3283 (19)          |
| C11  | C12  | 1.3781 (19)          | C1   | C13  | 1.5065 (18)          |
| C11  | C5   | 1.5152 (18)          | C1   | C2   | 1.5255 (19)          |
| C11  | C10  | 1.3905 (19)          | C3   | C2   | 1.5023 (19)          |
| C12  | C14  | 1.3915 (19)          |      |      |                      |

**Table 5 Bond Angles for AB\_AYA\_SP02261BR\_auto.**

| Atom | Atom | Atom | Angle/ $^\circ$ | Atom | Atom | Atom | Angle/ $^\circ$ |
|------|------|------|-----------------|------|------|------|-----------------|
| C12  | O3   | C13  | 104.55 (9)      | C11  | C10  | C9   | 121.53 (12)     |
| C14  | O4   | C17  | 116.91 (11)     | C16  | C10  | C9   | 121.54 (12)     |
| C7   | N1   | C9   | 123.72 (11)     | O2   | C7   | N1   | 122.68 (13)     |
| C7   | N1   | C8   | 119.68 (11)     | O2   | C7   | C6   | 120.13 (12)     |
| C8   | N1   | C9   | 116.23 (11)     | N1   | C7   | C6   | 116.98 (11)     |
| C12  | C11  | C5   | 107.53 (11)     | C3   | C4   | C5   | 124.25 (12)     |
| C12  | C11  | C10  | 121.71 (12)     | C7   | C6   | C5   | 109.57 (11)     |
| C10  | C11  | C5   | 130.66 (12)     | C13  | C1   | C2   | 111.79 (11)     |
| O3   | C12  | C14  | 124.56 (12)     | C4   | C3   | C2   | 124.40 (12)     |
| C11  | C12  | O3   | 113.03 (11)     | O4   | C14  | C12  | 116.31 (12)     |
| C11  | C12  | C14  | 122.23 (12)     | O4   | C14  | C15  | 126.83 (12)     |
| C10  | C16  | C15  | 122.08 (13)     | C12  | C14  | C15  | 116.83 (12)     |
| C14  | C15  | C16  | 120.69 (12)     | O3   | C13  | C5   | 104.27 (10)     |
| C11  | C5   | C4   | 107.62 (10)     | O3   | C13  | C1   | 108.65 (10)     |
| C11  | C5   | C6   | 111.95 (11)     | C1   | C13  | C5   | 115.06 (11)     |

| Atom | Atom | Atom | Angle/°     | Atom | Atom | Atom | Angle/°     |
|------|------|------|-------------|------|------|------|-------------|
| C11  | C5   | C13  | 99.29 (10)  | N1   | C9   | C10  | 116.58 (11) |
| C4   | C5   | C6   | 112.09 (10) | O1   | C2   | C1   | 110.89 (11) |
| C4   | C5   | C13  | 110.02 (11) | O1   | C2   | C3   | 110.41 (11) |
| C13  | C5   | C6   | 114.99 (11) | C3   | C2   | C1   | 111.96 (11) |
| C11  | C10  | C16  | 116.34 (12) |      |      |      |             |

| A   | B   | C   | D   | Angle/°     | A   | B   | C   | D   | Angle/°     |
|-----|-----|-----|-----|-------------|-----|-----|-----|-----|-------------|
| O3  | C12 | C14 | O4  | 4.52 (19)   | C10 | C11 | C12 | C14 | -3.7 (2)    |
| O3  | C12 | C14 | C15 | 173.59 (12) | C10 | C11 | C5  | C4  | 92.41 (16)  |
| O2  | C7  | C6  | C5  | 110.54 (14) | C10 | C11 | C5  | C6  | -31.18 (19) |
| N1  | C7  | C6  | C5  | -64.20 (15) | C10 | C11 | C5  | C13 | 153.02 (14) |
| C11 | C12 | C14 | O4  | 179.23 (12) | C10 | C16 | C15 | C14 | -1.0 (2)    |
| C11 | C12 | C14 | C15 | 1.1 (2)     | C7  | N1  | C9  | C10 | 70.75 (17)  |
| C11 | C5  | C4  | C3  | 115.50 (14) | C4  | C5  | C6  | C7  | -42.42 (14) |
| C11 | C5  | C6  | C7  | 78.62 (13)  | C4  | C5  | C13 | O3  | 80.35 (12)  |
| C11 | C5  | C13 | O3  | -32.35 (12) | C4  | C5  | C13 | C1  | -38.54 (15) |
| C11 | C5  | C13 | C1  | 151.24 (11) | C4  | C3  | C2  | O1  | 111.12 (15) |
| C11 | C10 | C9  | N1  | -40.79 (18) | C4  | C3  | C2  | C1  | 12.95 (19)  |
| C12 | O3  | C13 | C5  | 30.96 (12)  | C6  | C5  | C4  | C3  | 120.99 (14) |
| C12 | O3  | C13 | C1  | 154.13 (10) | C6  | C5  | C13 | O3  | 151.96 (10) |
| C12 | C11 | C5  | C4  | -91.42 (12) | C6  | C5  | C13 | C1  | 89.15 (14)  |
| C12 | C11 | C5  | C6  | 144.99 (11) | C13 | O3  | C12 | C11 | -16.69 (14) |
| C12 | C11 | C5  | C13 | 23.15 (13)  | C13 | O3  | C12 | C14 | 158.44 (12) |
| C12 | C11 | C10 | C16 | 3.73 (19)   | C13 | C5  | C4  | C3  | 8.29 (17)   |
| C12 | C11 | C10 | C9  | 167.59 (12) | C13 | C5  | C6  | C7  | 169.05 (11) |
| C16 | C15 | C14 | O4  | 176.70 (13) | C13 | C1  | C2  | O1  | 82.08 (13)  |
| C16 | C15 | C14 | C12 | 1.19 (19)   | C13 | C1  | C2  | C3  | -41.72 (15) |
| C16 | C10 | C9  | N1  | 148.34 (13) | C9  | N1  | C7  | O2  | 168.44 (12) |
| C15 | C16 | C10 | C11 | -1.4 (2)    | C9  | N1  | C7  | C6  | -16.97 (18) |
| C15 | C16 | C10 | C9  | 169.90 (13) | C2  | C1  | C13 | O3  | -59.60 (14) |
| C5  | C11 | C12 | O3  | -5.04 (15)  | C2  | C1  | C13 | C5  | 56.82 (15)  |
| C5  | C11 | C12 | C14 | 179.69 (12) | C8  | N1  | C7  | O2  | -4.3 (2)    |
| C5  | C11 | C10 | C16 | 179.44 (13) | C8  | N1  | C7  | C6  | 170.27 (11) |

| A   | B   | C   | D  | Angle/°     | A   | B  | C   | D   | Angle/°     |
|-----|-----|-----|----|-------------|-----|----|-----|-----|-------------|
| C5  | C11 | C10 | C9 | 8.1 (2)     | C8  | N1 | C9  | C10 | 116.26 (13) |
| C5  | C4  | C3  | C2 | 4.1 (2)     | C17 | O4 | C14 | C12 | 165.24 (12) |
| C10 | C11 | C12 | O3 | 171.55 (11) | C17 | O4 | C14 | C15 | 12.7 (2)    |

| Atom | x       | y       | z       | U(eq) |
|------|---------|---------|---------|-------|
| H1   | 4181.26 | 9477.91 | 2365.04 | 38    |
| H16  | 3617.34 | 5462.72 | 4934.12 | 23    |
| H15  | 4062.82 | 6634.05 | 6483.26 | 24    |
| H4   | 2520.99 | 7189.92 | 334.53  | 21    |
| H6A  | 5738.36 | 6719.54 | 85.95   | 23    |
| H6B  | 6002.04 | 6122.38 | 1457.35 | 23    |
| H1A  | 6049.6  | 8462.43 | 274.93  | 24    |
| H1B  | 6430.4  | 9139.05 | 1548.71 | 24    |
| H3   | 2183.03 | 8586.15 | -246.43 | 24    |
| H13  | 6750.07 | 7703.11 | 2415.63 | 21    |
| H9A  | 4959.33 | 5052.56 | 2508.5  | 25    |
| H9B  | 3407.58 | 4831.81 | 2663.69 | 25    |
| H2   | 4225.64 | 9411.15 | -311.38 | 25    |
| H8A  | 1814.58 | 5040.81 | -816.6  | 37    |
| H8B  | 1298.55 | 5169.31 | 571.48  | 37    |
| H8C  | 2206.57 | 4325.39 | 399.47  | 37    |
| H17A | 4312.77 | 7931.95 | 7652.65 | 43    |
| H17B | 5524.57 | 8667.03 | 7954.68 | 43    |
| H17C | 5937.81 | 7666.39 | 7810.57 | 43    |

### Experimental

Single crystals of  $\text{C}_{17}\text{H}_{19}\text{NO}_4$  were block type. A suitable crystal was selected and mounted on a XtaLAB Synergy, Dualflex, HyPix3000 diffractometer. The crystal was kept at 100.01(15) K during data collection. Using Olex2 [1], the structure was solved with the SHELXT [2] structure solution program using SHELXT and refined with the SHELXL [2] refinement package using SHELXL minimisation.

1. Dolomanov, O.V., Bourhis, L.J., Gildea, R.J., Howard, J.A.K. & Puschmann, H. (2009), *J. Appl. Cryst.* 42, 339-341
2. George M. Sheldrick, *Acta Cryst.* (2015). *C71*, 3–8.

### Crystal structure determination of [AB\_AYA\_SP02261BR\_auto]

**Crystal Data** for  $\text{C}_{17}\text{H}_{19}\text{NO}_4$  ( $M = 301.33$  g/mol): monoclinic, space group  $P2_1/n$  (no. 14),  $a = 9.7354(2)$  Å,  $b = 15.3138(2)$  Å,  $c = 9.9359(2)$  Å,  $\beta = 105.393(2)^\circ$ ,  $V = 1428.17(5)$  Å<sup>3</sup>,  $Z = 4$ ,  $T = 100.01(15)$  K,  $\mu(\text{Cu K}\alpha) = 0.821$  mm<sup>-1</sup>,  $D_{\text{calc}} = 1.401$  g/cm<sup>3</sup>, 20564 reflections measured ( $10.894^\circ \leq 2\theta \leq 136.478^\circ$ ), 2597 unique ( $R_{\text{int}} = 0.0585$ ,  $R_{\text{sigma}} = 0.0270$ ) which were used in all calculations. The final  $R_1$  was 0.0376 ( $I > 2\sigma(I)$ ) and  $wR_2$  was 0.1028 (all data).

### Refinement model description

Number of restraints - 0, number of constraints - unknown.

#### Details:

1.a Ternary CH refined with riding coordinates:

C13(H13), C2(H2)

1.b Secondary CH<sub>2</sub> refined with riding coordinates:

C6(H6A,H6B), C1(H1A,H1B), C9(H9A,H9B)

1.c Aromatic/amide H refined with riding coordinates:

C16(H16), C15(H15), C4(H4), C3(H3)

1.d Idealised Me refined as rotating group:

C8(H8A,H8B,H8C), C17(H17A,H17B,H17C)

1.e Idealised tetrahedral OH refined as rotating group:

O1(H1)

This report has been created with Olex2, compiled on 2023.08.24 svn.re1ec1418 for OlexSys. Please [let us know](#) if there are any errors or if you would like to have additional features.



## checkCIF/PLATON report

Structure factors have been supplied for datablock(s) ab\_aya\_sp02261br\_auto

THIS REPORT IS FOR GUIDANCE ONLY. IF USED AS PART OF A REVIEW PROCEDURE FOR PUBLICATION, IT SHOULD NOT REPLACE THE EXPERTISE OF AN EXPERIENCED CRYSTALLOGRAPHIC REFEREE.

No syntax errors found. CIF dictionary Interpreting this report

### Datablock: ab\_aya\_sp02261br\_auto

---

Bond precision: C-C = 0.0019 A Wavelength=1.54184  
Cell: a=9.7354(2) b=15.3138(2) c=9.9359(2)  
alpha=90 beta=105.393(2) gamma=90  
Temperature: 100 K

|                        | Calculated   | Reported     |
|------------------------|--------------|--------------|
| Volume                 | 1428.17(5)   | 1428.17(5)   |
| Space group            | P 21/n       | P 1 21/n 1   |
| Hall group             | -P 2yn       | -P 2yn       |
| Moiety formula         | C17 H19 N O4 | C17 H19 N O4 |
| Sum formula            | C17 H19 N O4 | C17 H19 N O4 |
| Mr                     | 301.33       | 301.33       |
| Dx, g cm <sup>-3</sup> | 1.401        | 1.401        |
| Z                      | 4            | 4            |
| Mu (mm <sup>-1</sup> ) | 0.821        | 0.821        |
| F000                   | 640.0        | 640.0        |
| F000'                  | 642.05       |              |
| h, k, lmax             | 11, 18, 11   | 11, 18, 11   |
| Nref                   | 2620         | 2597         |
| Tmin, Tmax             | 0.980, 0.992 | 0.249, 1.000 |
| Tmin'                  | 0.968        |              |

Correction method= # Reported T Limits: Tmin=0.249 Tmax=1.000  
AbsCorr = MULTI-SCAN

Data completeness= 0.991 Theta(max)= 68.239

R(reflections)= 0.0376( 2347) wR2(reflections)=  
0.1028( 2597)  
S = 1.057 Npar= 202

---

The following ALERTS were generated. Each ALERT has the format  
**test-name\_ALERT\_alert-type\_alert-level.**  
Click on the hyperlinks for more details of the test.

---

● **Alert level C**

PLAT911\_ALERT\_3\_C Missing FCF Refl Between Thmin & STh/L= 0.600 2 Report  
-8 13 4, -4 16 5,

---

● **Alert level G**

PLAT007\_ALERT\_5\_G Number of Unrefined Donor-H Atoms ..... 1 Report  
H1  
PLAT153\_ALERT\_1\_G The s.u.'s on the Cell Axes are Equal ..(Note) 0.0002 Ang.  
PLAT398\_ALERT\_2\_G Deviating C-O-C Angle From 120 for O3 . 104.5 Degree  
PLAT912\_ALERT\_4\_G Missing # of FCF Reflections Above STh/L= 0.600 21 Note  
PLAT969\_ALERT\_5\_G The 'Henn et al.' R-Factor-gap value ..... 2.87 Note  
Predicted wR2: Based on SigI\*\*2 3.59 or SHELX Weight 10.12  
PLAT978\_ALERT\_2\_G Number C-C Bonds with Positive Residual Density. 9 Info

---

0 **ALERT level A** = Most likely a serious problem - resolve or explain  
0 **ALERT level B** = A potentially serious problem, consider carefully  
1 **ALERT level C** = Check. Ensure it is not caused by an omission or oversight  
6 **ALERT level G** = General information/check it is not something unexpected

1 ALERT type 1 CIF construction/syntax error, inconsistent or missing data  
2 ALERT type 2 Indicator that the structure model may be wrong or deficient  
1 ALERT type 3 Indicator that the structure quality may be low  
1 ALERT type 4 Improvement, methodology, query or suggestion  
2 ALERT type 5 Informative message, check

---

---

It is advisable to attempt to resolve as many as possible of the alerts in all categories. Often the minor alerts point to easily fixed oversights, errors and omissions in your CIF or refinement strategy, so attention to these fine details can be worthwhile. In order to resolve some of the more serious problems it may be necessary to carry out additional measurements or structure refinements. However, the purpose of your study may justify the reported deviations and the more serious of these should normally be commented upon in the discussion or experimental section of a paper or in the "special\_details" fields of the CIF. checkCIF was carefully designed to identify outliers and unusual parameters, but every test has its limitations and alerts that are not important in a particular case may appear. Conversely, the absence of alerts does not guarantee there are no aspects of the results needing attention. It is up to the individual to critically assess their own results and, if necessary, seek expert advice.

#### **Publication of your CIF in IUCr journals**

A basic structural check has been run on your CIF. These basic checks will be run on all CIFs submitted for publication in IUCr journals (*Acta Crystallographica*, *Journal of Applied Crystallography*, *Journal of Synchrotron Radiation*); however, if you intend to submit to *Acta Crystallographica Section C* or *E* or *IUCrData*, you should make sure that full publication checks are run on the final version of your CIF prior to submission.

#### **Publication of your CIF in other journals**

Please refer to the *Notes for Authors* of the relevant journal for any special instructions relating to CIF submission.

---

PLATON version of 06/01/2024; check.def file version of 05/01/2024

Datblock ab\_aya\_sp02261br\_auto - ellipsoid plot

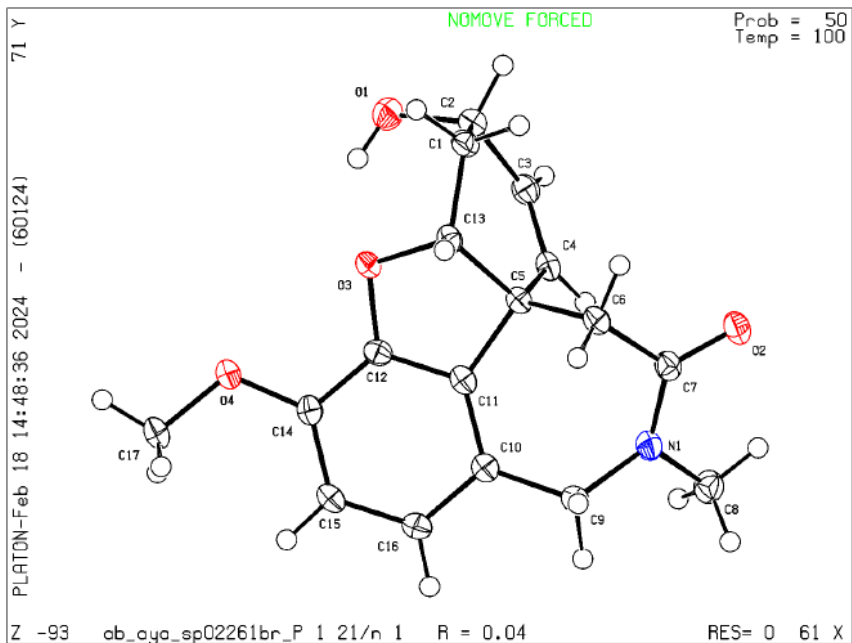

## SCXRD Data of dehydro-narcipavline (26b)

Crystal Data and Structure Refinement of (±)-26b (CCDC 2363948):

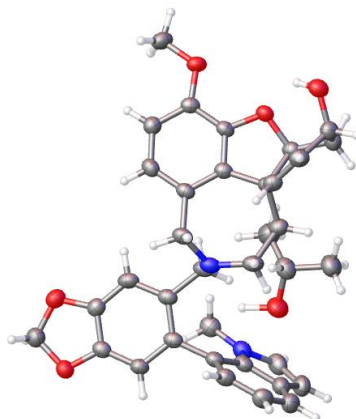

### **AB\_SP\_DHNPV\_auto**

|                                    |                                                               |
|------------------------------------|---------------------------------------------------------------|
| Identification code                | 2363948                                                       |
| Empirical formula                  | C <sub>36</sub> H <sub>40</sub> N <sub>2</sub> O <sub>6</sub> |
| Formula weight                     | 596.70                                                        |
| Temperature/K                      | 100.15                                                        |
| Crystal system                     | monoclinic                                                    |
| Space group                        | P2 <sub>1</sub> /c                                            |
| a/Å                                | 11.5497(2)                                                    |
| b/Å                                | 13.3748(3)                                                    |
| c/Å                                | 19.9348(3)                                                    |
| α/°                                | 90                                                            |
| β/°                                | 101.134(2)                                                    |
| γ/°                                | 90                                                            |
| Volume/Å <sup>3</sup>              | 3021.47(10)                                                   |
| Z                                  | 4                                                             |
| ρ <sub>calc</sub> /cm <sup>3</sup> | 1.312                                                         |
| μ/mm <sup>-1</sup>                 | 0.719                                                         |
| F(000)                             | 1272.0                                                        |
| Crystal size/mm <sup>3</sup>       | 0.4 × 0.4 × 0.4                                               |
| Radiation                          | CuKα (λ = 1.54184)                                            |
| 2θ range for data collection/°     | 7.802 to 140.658                                              |
| Index ranges                       | -13 ≤ h ≤ 13, -15 ≤ k ≤ 16, -20 ≤ l ≤ 24                      |
| Reflections collected              | 43284                                                         |
| Independent reflections            | 5477 [R <sub>int</sub> = 0.0549, R <sub>sigma</sub> = 0.0275] |
| Data/restraints/parameters         | 5477/0/405                                                    |
| Goodness-of-fit on F <sup>2</sup>  | 1.046                                                         |

|                                                |                               |
|------------------------------------------------|-------------------------------|
| Final R indexes [ $I \geq 2\sigma(I)$ ]        | $R_1 = 0.0535, wR_2 = 0.1481$ |
| Final R indexes [all data]                     | $R_1 = 0.0662, wR_2 = 0.1595$ |
| Largest diff. peak/hole / $e \text{ \AA}^{-3}$ | 0.55/-0.31                    |

## checkCIF/PLATON report

Structure factors have been supplied for datablock(s) ab\_sp\_dhnpv\_auto

THIS REPORT IS FOR GUIDANCE ONLY. IF USED AS PART OF A REVIEW PROCEDURE FOR PUBLICATION, IT SHOULD NOT REPLACE THE EXPERTISE OF AN EXPERIENCED CRYSTALLOGRAPHIC REFEREE.

No syntax errors found. CIF dictionary Interpreting this report

### Datablock: ab\_sp\_dhnpv\_auto

---

Bond precision: C-C = 0.0031 A Wavelength=1.54184

Cell: a=11.5497 (2) b=13.3748 (3) c=19.9348 (3)  
alpha=90 beta=101.134 (2) gamma=90

Temperature: 100 K

|                        | Calculated             | Reported               |
|------------------------|------------------------|------------------------|
| Volume                 | 3021.47 (10)           | 3021.47 (10)           |
| Space group            | P 21/c                 | P 1 21/c 1             |
| Hall group             | -P 2ybc                | -P 2ybc                |
| Moiety formula         | C33 H32 N2 O5, C3 H8 O | C33 H32 N2 O5, C3 H8 O |
| Sum formula            | C36 H40 N2 O6          | C36 H40 N2 O6          |
| Mr                     | 596.70                 | 596.70                 |
| Dx, g cm <sup>-3</sup> | 1.312                  | 1.312                  |
| Z                      | 4                      | 4                      |
| Mu (mm <sup>-1</sup> ) | 0.719                  | 0.719                  |
| F000                   | 1272.0                 | 1272.0                 |
| F000'                  | 1275.86                |                        |
| h, k, lmax             | 14, 16, 24             | 13, 16, 24             |
| Nref                   | 5770                   | 5477                   |
| Tmin, Tmax             | 0.788, 0.750           | 0.528, 1.000           |
| Tmin'                  | 0.714                  |                        |

Correction method= # Reported T Limits: Tmin=0.528 Tmax=1.000  
AbsCorr = ?

Data completeness= 0.949 Theta(max)= 70.329

R(reflections)= 0.0535 ( 4506) wR2(reflections)=  
0.1595 ( 5477)

S = 1.046 Npar= 405

---

The following ALERTS were generated. Each ALERT has the format  
**test-name\_ALERT\_alert-type\_alert-level.**  
Click on the hyperlinks for more details of the test.

---

 **Alert level A**

PLAT355\_ALERT\_3\_A Long O-H (X0.82,N0.98A) O008 - H008 . 1.17 Ang.

---

 **Alert level C**

PLAT052\_ALERT\_1\_C Info on Absorption Correction Method Not Given Please Do !  
PLAT906\_ALERT\_3\_C Large K Value in the Analysis of Variance ..... 4.844 Check  
PLAT911\_ALERT\_3\_C Missing FCF Refl Between Thmin & STh/L= 0.600 15 Report  
-12 8 5, -11 9 8, -11 9 9, -10 10 10, -13 3 11, -10 9 11,  
-9 9 14, -8 10 14, -7 10 14, -2 13 14, -9 8 15, -8 9 15,  
-8 8 16, 0 11 17, -5 7 21,

---

 **Alert level G**

PLAT007\_ALERT\_5\_G Number of Unrefined Donor-H Atoms ..... 1 Report  
H004  
PLAT398\_ALERT\_2\_G Deviating C-O-C Angle From 120 for O001 . 104.4 Degree  
PLAT398\_ALERT\_2\_G Deviating C-O-C Angle From 120 for O003 . 105.8 Degree  
PLAT398\_ALERT\_2\_G Deviating C-O-C Angle From 120 for O005 . 106.2 Degree  
PLAT432\_ALERT\_2\_G Short Inter X...Y Contact O005 ..C011 . 2.95 Ang.  
1-x,-1/2+y,1/2-z = 2\_645 Check  
PLAT720\_ALERT\_4\_G Number of Unusual/Non-Standard Labels ..... 84 Note  
O001 O002 O003 O004 H004 O005 N006 N007  
O008 H008 C009 C00A H00A C00B C00C C00D  
C00E C00F C00G C00H C00I C00J C00K H00K  
C00L C00M H00M C00N H00N C00O H00O C00P  
H00P C00Q H00B H00C C00R H00R C00S H00S  
C00T H00D H00E C00U H00F H00G C00V H00H  
H00I C00W H00J H00L C00X C00Y H00Y C00Z  
H00Z C010 H010 C011 H01A H01B H01C C012  
H01D H01E H01F C013 H013 C014 H014 C015  
H01G H01H C016 H016 C017 H01I H01J H01K  
C018 H01L H01M H01N  
PLAT793\_ALERT\_4\_G Model has Chirality at C00C (Centro SpGr) R Verify  
PLAT793\_ALERT\_4\_G Model has Chirality at C00M (Centro SpGr) R Verify  
PLAT793\_ALERT\_4\_G Model has Chirality at C00Y (Centro SpGr) S Verify  
PLAT883\_ALERT\_1\_G No Info/Value for \_atom\_sites\_solution\_primary . Please Do !  
PLAT912\_ALERT\_4\_G Missing # of FCF Reflections Above STh/L= 0.600 269 Note  
PLAT969\_ALERT\_5\_G The 'Henn et al.' R-Factor-gap value ..... 4.720 Note  
Predicted wR2: Based on SigI\*\*2 3.38 or SHELX Weight 15.24  
PLAT978\_ALERT\_2\_G Number C-C Bonds with Positive Residual Density. 7 Info

---

1 **ALERT level A** = Most likely a serious problem - resolve or explain  
0 **ALERT level B** = A potentially serious problem, consider carefully  
3 **ALERT level C** = Check. Ensure it is not caused by an omission or oversight  
13 **ALERT level G** = General information/check it is not something unexpected

2 ALERT type 1 CIF construction/syntax error, inconsistent or missing data



```
5 ALERT type 2 Indicator that the structure model may be wrong or deficient
3 ALERT type 3 Indicator that the structure quality may be low
5 ALERT type 4 Improvement, methodology, query or suggestion
2 ALERT type 5 Informative message, check
```

---

It is advisable to attempt to resolve as many as possible of the alerts in all categories. Often the minor alerts point to easily fixed oversights, errors and omissions in your CIF or refinement strategy, so attention to these fine details can be worthwhile. In order to resolve some of the more serious problems it may be necessary to carry out additional measurements or structure refinements. However, the purpose of your study may justify the reported deviations and the more serious of these should normally be commented upon in the discussion or experimental section of a paper or in the "special\_details" fields of the CIF. checkCIF was carefully designed to identify outliers and unusual parameters, but every test has its limitations and alerts that are not important in a particular case may appear. Conversely, the absence of alerts does not guarantee there are no aspects of the results needing attention. It is up to the individual to critically assess their own results and, if necessary, seek expert advice.

#### **Publication of your CIF in IUCr journals**

A basic structural check has been run on your CIF. These basic checks will be run on all CIFs submitted for publication in IUCr journals (*Acta Crystallographica*, *Journal of Applied Crystallography*, *Journal of Synchrotron Radiation*); however, if you intend to submit to *Acta Crystallographica Section C* or *E* or *IUCrData*, you should make sure that full publication checks are run on the final version of your CIF prior to submission.

#### **Publication of your CIF in other journals**

Please refer to the *Notes for Authors* of the relevant journal for any special instructions relating to CIF submission.

#### **Validation response form**

Please find below a validation response form (VRF) that can be filled in and pasted into your CIF.

```
# start Validation Reply Form
_vrf_PLAT355_ab_sp_dhnpv_auto
;
PROBLEM: Long O-H (X0.82,N0.98A) O008 - H008 . 1.17 Ang.
RESPONSE: ...
;
# end Validation Reply Form
```

---

**PLATON version of 13/05/2024; check.def file version of 04/05/2024**

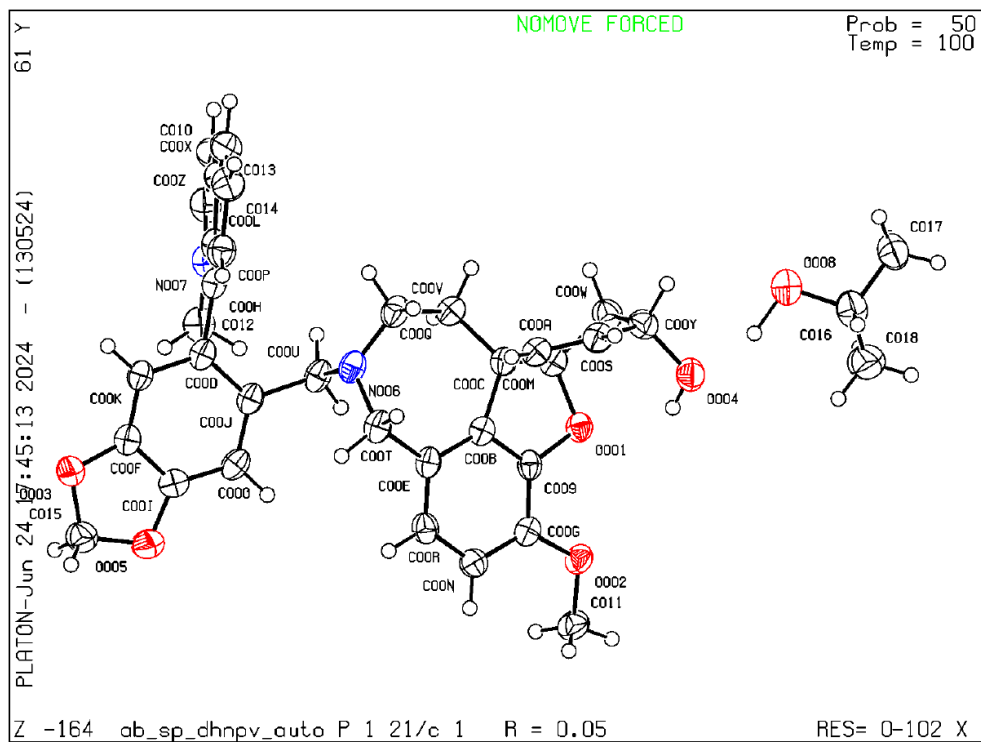

## SCXRD Data of (-)-14

Crystal Data and Structure Refinement of (-)-14 (CCDC 2384521):

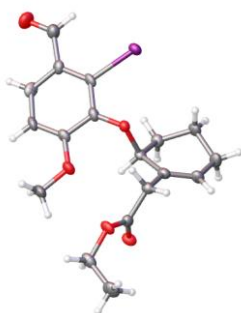

| <b>Table 1 Crystal data and structure refinement for (-)-14</b> |                                                               |
|-----------------------------------------------------------------|---------------------------------------------------------------|
| CCDC                                                            | 2384521                                                       |
| Empirical formula                                               | C <sub>18</sub> H <sub>21</sub> IO <sub>5</sub>               |
| Formula weight                                                  | 444.25                                                        |
| Temperature/K                                                   | 99.98(11)                                                     |
| Crystal system                                                  | monoclinic                                                    |
| Space group                                                     | P2 <sub>1</sub>                                               |
| a/Å                                                             | 13.1948(3)                                                    |
| b/Å                                                             | 4.76050(10)                                                   |
| c/Å                                                             | 14.5444(4)                                                    |
| α/°                                                             | 90                                                            |
| β/°                                                             | 102.504(3)                                                    |
| γ/°                                                             | 90                                                            |
| Volume/Å <sup>3</sup>                                           | 891.92(4)                                                     |
| Z                                                               | 2                                                             |
| ρ <sub>calc</sub> /g/cm <sup>3</sup>                            | 1.654                                                         |
| μ/mm <sup>-1</sup>                                              | 14.318                                                        |
| F(000)                                                          | 444.0                                                         |
| Crystal size/mm <sup>3</sup>                                    | 0.54 × 0.08 × 0.04                                            |
| Radiation                                                       | Cu Kα (λ = 1.54184)                                           |
| 2θ range for data collection/°                                  | 6.224 to 136.044                                              |
| Index ranges                                                    | -15 ≤ h ≤ 15, -4 ≤ k ≤ 5, -17 ≤ l ≤ 17                        |
| Reflections collected                                           | 9822                                                          |
| Independent reflections                                         | 2723 [R <sub>int</sub> = 0.0499, R <sub>sigma</sub> = 0.0439] |
| Data/restraints/parameters                                      | 2723/1/219                                                    |
| Goodness-of-fit on F <sup>2</sup>                               | 1.079                                                         |
| Final R indexes [I > 2σ (I)]                                    | R <sub>1</sub> = 0.0309, wR <sub>2</sub> = 0.0764             |
| Final R indexes [all data]                                      | R <sub>1</sub> = 0.0323, wR <sub>2</sub> = 0.0774             |
| Largest diff. peak/hole / e Å <sup>-3</sup>                     | 0.94/-1.05                                                    |
| Flack parameter                                                 | -0.028(6)                                                     |

**Table 2 Fractional Atomic Coordinates ( $\times 10^4$ ) and Equivalent Isotropic Displacement Parameters ( $\text{\AA}^2 \times 10^3$ ) for 2384521.  $U_{eq}$  is defined as 1/3 of the trace of the orthogonalised  $U_{ij}$  tensor.**

| Atom | x         | y          | z         | U(eq)     |
|------|-----------|------------|-----------|-----------|
| II   | 3839.1(2) | 5176.0(13) | 4943.9(2) | 25.13(14) |
| O3   | 3107(3)   | 4289(10)   | 6815(3)   | 22.9(11)  |
| O2   | 1452(4)   | -150(20)   | 2898(3)   | 47.8(19)  |
| C11  | 5001(4)   | 5070(30)   | 8839(4)   | 27.3(14)  |
| C4   | 973(4)    | -342(16)   | 5653(4)   | 27(2)     |
| C1   | 2590(5)   | 2757(16)   | 5213(5)   | 23.9(15)  |
| C2   | 1927(5)   | 1252(15)   | 4498(4)   | 24.7(16)  |
| C15  | 3132(5)   | 5943(14)   | 8747(4)   | 25(2)     |
| C8   | 2021(5)   | 1169(17)   | 3510(5)   | 35(2)     |
| C6   | 2467(5)   | 2751(15)   | 6141(5)   | 23.9(15)  |
| C13  | 5598(5)   | 3130(18)   | 7453(5)   | 29.0(17)  |
| C9   | 3734(5)   | 2603(15)   | 7598(4)   | 21.4(15)  |
| C14  | 4650(5)   | 1202(15)   | 7298(5)   | 24.7(16)  |
| C5   | 1618(5)   | 1248(15)   | 6347(5)   | 24.3(16)  |
| C7   | 681(4)    | -90(30)    | 7516(5)   | 36(2)     |
| C10  | 4015(5)   | 4567(15)   | 8417(4)   | 24.3(19)  |
| O1   | 1494(3)   | 1493(11)   | 7249(3)   | 30.5(12)  |
| C12  | 5914(5)   | 3929(19)   | 8490(5)   | 34.2(19)  |
| C3   | 1143(5)   | -297(17)   | 4751(5)   | 27(2)     |
| C16  | 2575(5)   | 4080(16)   | 9312(4)   | 23.3(15)  |
| O5   | 1658(3)   | 5246(18)   | 9385(3)   | 28.7(9)   |
| C17  | 1100(5)   | 3700(19)   | 9988(5)   | 31.9(18)  |
| C18  | 1454(5)   | 4620(20)   | 11003(5)  | 44(3)     |
| O4   | 2894(3)   | 1911(11)   | 9678(3)   | 26.7(11)  |

**Table 3 Anisotropic Displacement Parameters ( $\text{\AA}^2 \times 10^3$ ) for 2384521. The Anisotropic displacement factor exponent takes the form:  $-2\pi^2[h^2a^{*2}U_{11}+2hka^*b^*U_{12}+\dots]$ .**

| Atom | $U_{11}$  | $U_{22}$ | $U_{33}$  | $U_{23}$ | $U_{13}$  | $U_{12}$ |
|------|-----------|----------|-----------|----------|-----------|----------|
| II   | 21.91(19) | 27.6(3)  | 28.75(19) | 3.5(3)   | 11.72(13) | 1.3(3)   |
| O3   | 19(2)     | 27(3)    | 23(2)     | 0.4(19)  | 5.8(16)   | -1.7(19) |
| O2   | 49(3)     | 60(6)    | 33(2)     | -16(4)   | 5(2)      | -12(4)   |
| C11  | 26(3)     | 32(4)    | 27(3)     | -5(5)    | 13(2)     | -1(5)    |
| C4   | 16(3)     | 27(7)    | 40(3)     | 4(3)     | 7(2)      | -5(3)    |
| C1   | 15(3)     | 24(4)    | 36(4)     | 4(3)     | 12(3)     | 3(3)     |
| C2   | 17(3)     | 25(4)    | 31(3)     | -3(3)    | 3(3)      | 3(3)     |
| C15  | 22(3)     | 27(6)    | 27(3)     | 3(3)     | 8(2)      | 3(3)     |
| C8   | 27(3)     | 43(6)    | 35(4)     | -4(3)    | 8(3)      | -4(3)    |
| C6   | 17(3)     | 22(4)    | 34(4)     | 0(3)     | 7(3)      | 0(3)     |

**Table 3 Anisotropic Displacement Parameters ( $\text{\AA}^2 \times 10^3$ ) for 2384521. The Anisotropic displacement factor exponent takes the form:  $-2\pi^2[h^2a^{*2}U_{11}+2hka^*b^*U_{12}+\dots]$ .**

| Atom | $U_{11}$ | $U_{22}$ | $U_{33}$ | $U_{23}$ | $U_{13}$ | $U_{12}$ |
|------|----------|----------|----------|----------|----------|----------|
| C13  | 20(3)    | 38(5)    | 31(3)    | -2(3)    | 12(3)    | 0(3)     |
| C9   | 21(3)    | 19(4)    | 25(3)    | 6(3)     | 5(3)     | 1(3)     |
| C14  | 23(3)    | 22(4)    | 30(3)    | 0(3)     | 8(3)     | 5(3)     |
| C5   | 19(3)    | 24(4)    | 34(3)    | 2(3)     | 13(3)    | 4(3)     |
| C7   | 22(3)    | 50(7)    | 38(3)    | 10(5)    | 11(2)    | -8(5)    |
| C10  | 22(3)    | 28(6)    | 25(3)    | 4(3)     | 10(2)    | 3(3)     |
| O1   | 23(2)    | 37(3)    | 34(2)    | 1(2)     | 12.8(19) | -5(2)    |
| C12  | 19(3)    | 53(6)    | 33(3)    | -6(4)    | 9(3)     | -1(3)    |
| C3   | 31(3)    | 14(7)    | 34(3)    | -5(3)    | 2(2)     | 5(3)     |
| C16  | 22(3)    | 26(4)    | 23(3)    | -4(3)    | 6(2)     | -1(3)    |
| O5   | 19.9(18) | 32(3)    | 39(2)    | 6(4)     | 16.1(15) | 4(4)     |
| C17  | 25(4)    | 27(5)    | 49(4)    | 5(3)     | 19(3)    | 5(3)     |
| C18  | 31(3)    | 59(9)    | 48(4)    | 5(4)     | 23(3)    | 5(4)     |
| O4   | 29(3)    | 21(3)    | 34(2)    | 4(2)     | 14(2)    | 5(2)     |

**Table 4 Bond Lengths for 2384521.**

| Atom | Atom | Length/ $\text{\AA}$ | Atom | Atom | Length/ $\text{\AA}$ |
|------|------|----------------------|------|------|----------------------|
| I1   | C1   | 2.116(7)             | C15  | C16  | 1.504(9)             |
| O3   | C6   | 1.361(8)             | C6   | C5   | 1.415(9)             |
| O3   | C9   | 1.490(7)             | C13  | C14  | 1.528(10)            |
| O2   | C8   | 1.209(9)             | C13  | C12  | 1.524(9)             |
| C11  | C10  | 1.334(8)             | C9   | C14  | 1.524(9)             |
| C11  | C12  | 1.507(9)             | C9   | C10  | 1.496(9)             |
| C4   | C5   | 1.395(9)             | C5   | O1   | 1.362(8)             |
| C4   | C3   | 1.379(9)             | C7   | O1   | 1.432(9)             |
| C1   | C2   | 1.402(9)             | C16  | O5   | 1.356(8)             |
| C1   | C6   | 1.394(9)             | C16  | O4   | 1.195(8)             |
| C2   | C8   | 1.469(9)             | O5   | C17  | 1.460(9)             |
| C2   | C3   | 1.384(10)            | C17  | C18  | 1.514(10)            |
| C15  | C10  | 1.504(9)             |      |      |                      |

**Table 5 Bond Angles for 2384521.**

| Atom Atom Atom Angle/ $^\circ$ |     |     |          | Atom Atom Atom Angle/ $^\circ$ |     |     |          |
|--------------------------------|-----|-----|----------|--------------------------------|-----|-----|----------|
| C6                             | O3  | C9  | 114.6(5) | C10                            | C9  | C14 | 115.2(5) |
| C10                            | C11 | C12 | 123.4(7) | C9                             | C14 | C13 | 111.7(6) |
| C3                             | C4  | C5  | 118.7(6) | C4                             | C5  | C6  | 120.6(6) |
| C2                             | C1  | I1  | 121.8(5) | O1                             | C5  | C4  | 124.2(6) |
| C6                             | C1  | I1  | 116.0(5) | O1                             | C5  | C6  | 115.2(6) |
| C6                             | C1  | C2  | 122.2(6) | C11                            | C10 | C15 | 121.3(6) |
| C1                             | C2  | C8  | 124.7(6) | C11                            | C10 | C9  | 121.8(7) |
| C3                             | C2  | C1  | 117.2(6) | C9                             | C10 | C15 | 116.8(5) |

**Table 5 Bond Angles for 2384521.**

| Atom Atom Atom Angle/° |     |     |          | Atom Atom Atom Angle/° |     |     |          |
|------------------------|-----|-----|----------|------------------------|-----|-----|----------|
| C3                     | C2  | C8  | 118.2(6) | C5                     | O1  | C7  | 118.0(6) |
| C10                    | C15 | C16 | 114.9(6) | C11                    | C12 | C13 | 110.9(5) |
| O2                     | C8  | C2  | 124.4(7) | C4                     | C3  | C2  | 123.2(6) |
| O3                     | C6  | C1  | 120.8(6) | O5                     | C16 | C15 | 110.5(6) |
| O3                     | C6  | C5  | 121.1(6) | O4                     | C16 | C15 | 125.9(6) |
| C1                     | C6  | C5  | 118.0(6) | O4                     | C16 | O5  | 123.5(7) |
| C12                    | C13 | C14 | 109.6(6) | C16                    | O5  | C17 | 114.5(7) |
| O3                     | C9  | C14 | 111.1(5) | O5                     | C17 | C18 | 110.5(7) |
| O3                     | C9  | C10 | 105.8(5) |                        |     |     |          |

**Table 6 Torsion Angles for 2384521.**

| A   | B   | C   | D   | Angle/°   | A   | B   | C   | D   | Angle/°   |
|-----|-----|-----|-----|-----------|-----|-----|-----|-----|-----------|
| I1  | C1  | C2  | C8  | 0.3(10)   | C6  | C5  | O1  | C7  | -176.9(7) |
| I1  | C1  | C2  | C3  | 179.1(5)  | C9  | O3  | C6  | C1  | -118.0(6) |
| I1  | C1  | C6  | O3  | 1.7(8)    | C9  | O3  | C6  | C5  | 66.2(8)   |
| I1  | C1  | C6  | C5  | 177.6(5)  | C14 | C13 | C12 | C11 | -51.9(9)  |
| O3  | C6  | C5  | C4  | -179.4(6) | C14 | C9  | C10 | C11 | 0.9(10)   |
| O3  | C6  | C5  | O1  | 0.6(10)   | C14 | C9  | C10 | C15 | -178.7(6) |
| O3  | C9  | C14 | C13 | 87.2(6)   | C5  | C4  | C3  | C2  | 0.1(11)   |
| O3  | C9  | C10 | C11 | -122.3(8) | C10 | C11 | C12 | C13 | 21.0(13)  |
| O3  | C9  | C10 | C15 | 58.1(7)   | C10 | C15 | C16 | O5  | -165.4(5) |
| C4  | C5  | O1  | C7  | 3.1(10)   | C10 | C15 | C16 | O4  | 16.8(9)   |
| C1  | C2  | C8  | O2  | 179.4(8)  | C10 | C9  | C14 | C13 | -33.2(8)  |
| C1  | C2  | C3  | C4  | 2.1(11)   | C12 | C11 | C10 | C15 | -175.0(7) |
| C1  | C6  | C5  | C4  | 4.7(10)   | C12 | C11 | C10 | C9  | 5.4(13)   |
| C1  | C6  | C5  | O1  | -175.3(6) | C12 | C13 | C14 | C9  | 58.9(8)   |
| C2  | C1  | C6  | O3  | -178.3(6) | C3  | C4  | C5  | C6  | -3.6(10)  |
| C2  | C1  | C6  | C5  | -2.4(10)  | C3  | C4  | C5  | O1  | 176.4(6)  |
| C15 | C16 | O5  | C17 | -175.2(5) | C3  | C2  | C8  | O2  | 0.6(12)   |
| C8  | C2  | C3  | C4  | -179.0(7) | C16 | C15 | C10 | C11 | -103.2(8) |
| C6  | O3  | C9  | C14 | 77.4(7)   | C16 | C15 | C10 | C9  | 76.4(7)   |
| C6  | O3  | C9  | C10 | -156.8(5) | C16 | O5  | C17 | C18 | 87.1(8)   |
| C6  | C1  | C2  | C8  | -179.7(7) | O4  | C16 | O5  | C17 | 2.7(9)    |
| C6  | C1  | C2  | C3  | -0.9(10)  |     |     |     |     |           |

**Table 7 Hydrogen Atom Coordinates ( $\text{\AA} \times 10^4$ ) and Isotropic Displacement Parameters ( $\text{\AA}^2 \times 10^3$ ) for 2384521.**

| Atom | x       | y        | z       | U(eq) |
|------|---------|----------|---------|-------|
| H11  | 5133.5  | 6203.51  | 9389.71 | 33    |
| H4   | 426.17  | -1436.44 | 5799.17 | 33    |
| H15A | 2622.67 | 6632.06  | 8190.14 | 30    |
| H15B | 3404.25 | 7597.45  | 9135.29 | 30    |

**Table 7 Hydrogen Atom Coordinates ( $\text{\AA}\times 10^4$ ) and Isotropic Displacement Parameters ( $\text{\AA}^2\times 10^3$ ) for 2384521.**

| Atom | <i>x</i> | <i>y</i> | <i>z</i> | U(eq) |
|------|----------|----------|----------|-------|
| H8   | 2565.12  | 2221.16  | 3341.44  | 41    |
| H13A | 6180.39  | 2156.31  | 7257.21  | 35    |
| H13B | 5431.76  | 4845.36  | 7064.44  | 35    |
| H9   | 3279.62  | 1094.48  | 7767.31  | 26    |
| H14A | 4447.14  | 691.3    | 6623.42  | 30    |
| H14B | 4832.69  | -548.46  | 7663.96  | 30    |
| H7A  | 6.65     | 690.59   | 7204.04  | 54    |
| H7B  | 755.34   | 11.16    | 8200.52  | 54    |
| H7C  | 723.71   | -2054.02 | 7326.55  | 54    |
| H12A | 6192.84  | 2254.68  | 8864.17  | 41    |
| H12B | 6469.38  | 5364.44  | 8575.37  | 41    |
| H3   | 700.53   | -1380.58 | 4280.2   | 32    |
| H17A | 1227.28  | 1661.51  | 9937.83  | 38    |
| H17B | 345.65   | 4037.14  | 9775.42  | 38    |
| H18A | 1353.21  | 6651.32  | 11048.64 | 66    |
| H18B | 2191.1   | 4169.66  | 11226.35 | 66    |
| H18C | 1046.74  | 3636.71  | 11392.69 | 66    |

## checkCIF/PLATON report

Structure factors have been supplied for datablock(s) ab\_aya\_sp02336r\_souvik

THIS REPORT IS FOR GUIDANCE ONLY. IF USED AS PART OF A REVIEW PROCEDURE FOR PUBLICATION, IT SHOULD NOT REPLACE THE EXPERTISE OF AN EXPERIENCED CRYSTALLOGRAPHIC REFEREE.

No syntax errors found. CIF dictionary Interpreting this report

### Datablock: ab\_aya\_sp02336r\_souvik

---

Bond precision: C-C = 0.0096 A Wavelength=1.54184  
Cell: a=13.1948 (3) b=4.7605 (1) c=14.5444 (4)  
alpha=90 beta=102.504 (3) gamma=90  
Temperature: 100 K

|                        | Calculated   | Reported     |
|------------------------|--------------|--------------|
| Volume                 | 891.92 (4)   | 891.92 (4)   |
| Space group            | P 21         | P 1 21 1     |
| Hall group             | P 2yb        | P 2yb        |
| Moiety formula         | C18 H21 I O5 | C18 H21 I O5 |
| Sum formula            | C18 H21 I O5 | C18 H21 I O5 |
| Mr                     | 444.25       | 444.25       |
| Dx, g cm <sup>-3</sup> | 1.654        | 1.654        |
| Z                      | 2            | 2            |
| Mu (mm <sup>-1</sup> ) | 14.318       | 14.318       |
| F000                   | 444.0        | 444.0        |
| F000'                  | 444.69       |              |
| h, k, lmax             | 15, 5, 17    | 15, 5, 17    |
| Nref                   | 3255 [ 1840] | 2723         |
| Tmin, Tmax             | 0.291, 0.564 | 0.189, 1.000 |
| Tmin'                  | 0.000        |              |

Correction method= # Reported T Limits: Tmin=0.189 Tmax=1.000  
AbsCorr = MULTI-SCAN

Data completeness= 1.48/0.84 Theta(max)= 68.022

R(reflections)= 0.0309 ( 2575) wR2(reflections)=  
0.0774 ( 2723)  
S = 1.079 Npar= 219

---



---

The following ALERTS were generated. Each ALERT has the format  
**test-name\_ALERT\_alert-type\_alert-level.**  
Click on the hyperlinks for more details of the test.

---

● **Alert level C**

PLAT342\_ALERT\_3\_C Low Bond Precision on C-C Bonds ..... 0.00956 Ang.  
PLAT911\_ALERT\_3\_C Missing FCF Refl Between Thmin & STh/L= 0.600 6 Report  
6 5 0, -11 4 5, 4 5 6, -8 2 10, -7 3 14, -6 3 14,  
PLAT915\_ALERT\_3\_C No Flack x Check Done: Low Friedel Pair Coverage 63 %

---

● **Alert level G**

PLAT791\_ALERT\_4\_G Model has Chirality at C9 (Sohncke SpGr) S Verify  
PLAT909\_ALERT\_3\_G Percentage of I>2sig(I) Data at Theta(Max) Still 88% Note  
PLAT912\_ALERT\_4\_G Missing # of FCF Reflections Above STh/L= 0.600 3 Note  
PLAT969\_ALERT\_5\_G The 'Henn et al.' R-Factor-gap value ..... 1.839 Note  
Predicted wR2: Based on SigI\*\*2 4.21 or SHELX Weight 7.17  
PLAT978\_ALERT\_2\_G Number C-C Bonds with Positive Residual Density. 0 Info

---

- 0 **ALERT level A** = Most likely a serious problem - resolve or explain
- 0 **ALERT level B** = A potentially serious problem, consider carefully
- 3 **ALERT level C** = Check. Ensure it is not caused by an omission or oversight
- 5 **ALERT level G** = General information/check it is not something unexpected

- 0 ALERT type 1 CIF construction/syntax error, inconsistent or missing data
  - 1 ALERT type 2 Indicator that the structure model may be wrong or deficient
  - 4 ALERT type 3 Indicator that the structure quality may be low
  - 2 ALERT type 4 Improvement, methodology, query or suggestion
  - 1 ALERT type 5 Informative message, check
- 
-

It is advisable to attempt to resolve as many as possible of the alerts in all categories. Often the minor alerts point to easily fixed oversights, errors and omissions in your CIF or refinement strategy, so attention to these fine details can be worthwhile. In order to resolve some of the more serious problems it may be necessary to carry out additional measurements or structure refinements. However, the purpose of your study may justify the reported deviations and the more serious of these should normally be commented upon in the discussion or experimental section of a paper or in the "special\_details" fields of the CIF. checkCIF was carefully designed to identify outliers and unusual parameters, but every test has its limitations and alerts that are not important in a particular case may appear. Conversely, the absence of alerts does not guarantee there are no aspects of the results needing attention. It is up to the individual to critically assess their own results and, if necessary, seek expert advice.

#### **Publication of your CIF in IUCr journals**

A basic structural check has been run on your CIF. These basic checks will be run on all CIFs submitted for publication in IUCr journals (*Acta Crystallographica*, *Journal of Applied Crystallography*, *Journal of Synchrotron Radiation*); however, if you intend to submit to *Acta Crystallographica Section C* or *E* or *IUCrData*, you should make sure that full publication checks are run on the final version of your CIF prior to submission.

#### **Publication of your CIF in other journals**

Please refer to the *Notes for Authors* of the relevant journal for any special instructions relating to CIF submission.

---

**PLATON version of 22/08/2024; check.def file version of 21/08/2024**

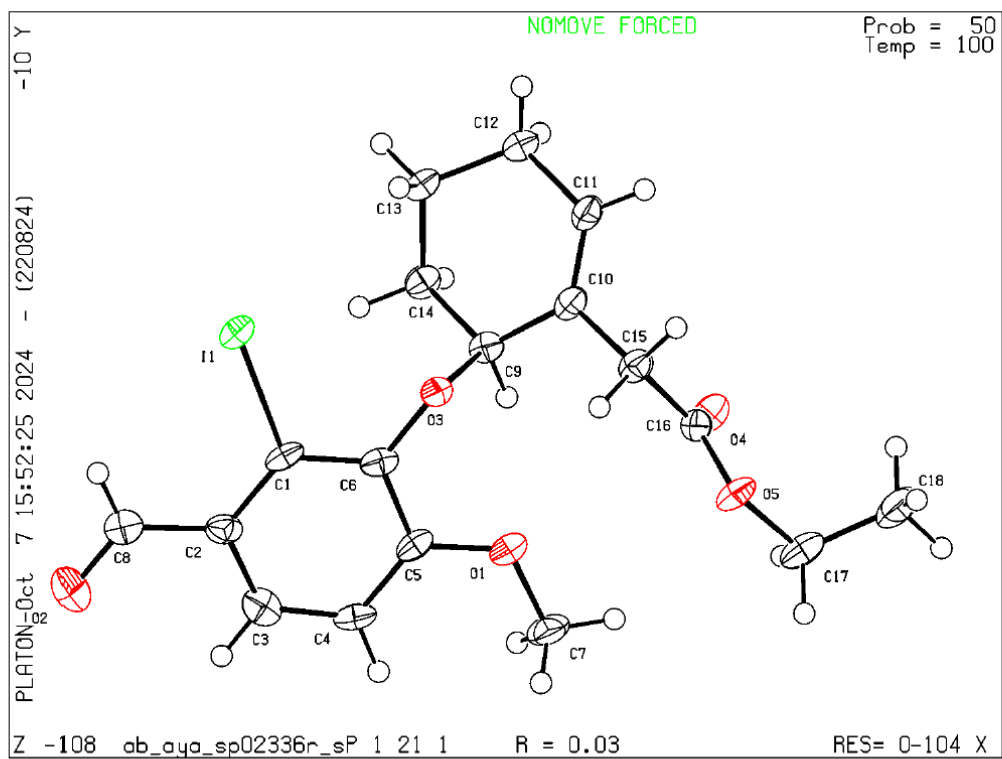

## References:

1. (a) T. T. F. Chiang, H. K. Wang and J. C. Hsieh, *Tetrahedron*, 2016, **72**, 5640–5645.  
(b) J. Q. Chen, J. H. Xie, D. H. Bao, S. Liu, Q. L. Zhou, *Org. Lett.* 2012, **14**, 2714–2717.
2. B. M. Trost, F. D. Toste, *J. Am. Chem. Soc.* 2000, **122**, 11262–11263.
3. Y. Zhang, S. Shen, H. Fang, T. Xu, *Org. Lett.* 2020, **22**, 1244–1248.
4. M. Safratová, A. H. álková, D. Hulcová, K. Breiterová, V. Hrabcová, M. Machado, D. Fontnha, M. Prudêncio, J. Kuněs, J. Chlebek, D. Jan, M. Hrabínová, L. Nováková, R. Havelek, M. Seifrtová, L. Opletal, L. Cahlíková, *Arch. Pharm. Res.* 2018, **41**, 208–218.
5. Gaussian 16, Revision C.01, M. J. Frisch, G. W. Trucks, H. B. Schlegel, G. E. Scuseria, M. A. Robb, J. R. Cheeseman, G. Scalmani, V. Barone, G. A. Petersson, H. Nakatsuji, X. Li, M. Caricato, A. V. Marenich, J. Bloino, B. G. Janesko, R. Gomperts, B. Mennucci, H. P. Hratchian, J. V. Ortiz, A. F. Izmaylov, J. L. Sonnenberg, D. Williams-Young, F. Ding, F. Lipparini, F. Egidi, J. Goings, B. Peng, A. Petrone, T. Henderson, D. Ranasinghe, V. G. Zakrzewski, J. Gao, N. Rega, G. Zheng, W. Liang, M. Hada, M. Ehara, K. Toyota, R. Fukuda, J. Hasegawa, M. Ishida, T. Nakajima, Y. Honda, O. Kitao, H. Nakai, T. Vreven, K. Throssell, J. A. Jr. Montgomery, J. E. Peralta, F. Ogliaro, M. J. Bearpark, J. J. Heyd, E. N. Brothers, K. N. Kudin, V. N. Staroverov, T. A. Keith, R. Kobayashi, J. Normand, K. Raghavachari, A. P. Rendell, J. C. Burant, S. S. Iyengar, J. Tomasi, M. Cossi, J. M. Millam, M. Klene, C. Adamo, R. Cammi, J. W. Ochterski, R. L. Martin, K. Morokuma, O. Farkas, J. B. Foresman and D. J. Fox, Gaussian, Inc., Wallingford CT, 2016.
